# Supplementary material for: Ox-LDL-mediated ILF3 overexpression in gastric cancer progression by activating the PI3K/AKT/mTOR signaling pathway
Source: Aging (Albany NY). 2022 May 4;14(9):3887–909. doi: 10.18632/aging.204051 (PMC9134943; doi:10.18632/aging.204051)
Supplement: Supplementary Table 1 [file aging-14-204051-s001.xlsx]

## Sheet: Sheet 1
Supplementary Table 1. The differentially expressed genes between the control group and the si-ILF3 group.
ENSEMBL_ID	SYMBOL	ENTREZID	GENENAME	log2FoldChange	pvalue	padj	B_1_Counts	B_2_Counts	B_3_Counts	A_1_Counts	A_2_Counts	A_3_Counts	B_1_FPKM	B_2_FPKM	B_3_FPKM	A_1_FPKM	A_2_FPKM	A_3_FPKM
ENSG00000010310	GIPR	2696	gastric inhibitory polypeptide receptor	-1.48793	8.2862e-14	5.09084e-11	215.312	215.949	241.332	494.05	694.807	696.473	2.2162	1.90944	2.87199	3.4771	4.04414	4.42719
ENSG00000011201	ANOS1	3730	anosmin 1	5.27561	0.0105583		3.68055	8.30573	9.78372	0	0	0	0.006895	0.013502	0.016181	0	0	0
ENSG00000019582	CD74	972	CD74 molecule	-1.17485	0.0451021		29.4444	11.9972	32.6124	82.6819	48.9144	35.241	0.338208	0.074184	0.214496	0.709821	0.476941	0.438388
ENSG00000047457	CP	1356	ceruloplasmin	-1.64125	0.00479746		8.28123	21.2258	29.3512	74.5158	65.5898	42.6601	0.028566	0.070049	0.097692	0.413391	0.26293	0.146804
ENSG00000070182	SPTB	6710	spectrin beta, erythrocytic	1.65831	0.0014499		54.2881	209.489	80.4439	36.7475	40.0209	32.4588	0.172283	0.512457	0.263516	0.069913	0.155215	0.07424
ENSG00000070985	TRPM5	29850	transient receptor potential cation channel subfamily M member 5	-6.04714	0.00152462		0	0	0	4.08306	4.44676	26.8944	0	0	0	0.012412	0.01055	0.079637
ENSG00000075290	WNT8B	7479	Wnt family member 8B	-1.50902	0.0371531		16.5625	3.69144	14.132	29.6022	35.5741	32.4588	0.090467	0.017006	0.073971	0.163916	0.199195	0.182289
ENSG00000075461	CACNG4	27092	calcium voltage-gated channel auxiliary subunit gamma 4	-2.04734	0.000578083		8.28123	22.1486	18.4804	50.0175	106.722	45.4423	0.02787	0.075665	0.060452	0.173468	0.376733	0.156503
ENSG00000075891	PAX2	5076	paired box 2	5.78748	0.00227667		3.68055	17.5343	9.78372	0	0	0	0.010235	0.048603	0.024677	0	0	0
ENSG00000076067	RBMS2	5939	RNA binding motif single stranded interacting protein 2	-1.36198	0.0238938	0.160435	6532.97	2225.01	1926.31	8961.29	9251.49	9250.75	10.6111	13.8452	13.3871	14.5658	14.3548	14.1348
ENSG00000077264	PAK3	5063	p21 (RAC1) activated kinase 3	-1.49846	0.0255378		23.9236	29.5315	4.34832	50.0175	75.595	38.9505	0.031223	0.038127	0.005714	0.191313	0.299812	0.237375
ENSG00000077522	ACTN2	88	actinin alpha 2	-2.26073	0.0333011		0	11.0743	4.34832	21.4361	14.452	38.0232	0	0.16516	0.009977	0.048094	0.09083	0.130133
ENSG00000078549	ADCYAP1R1	117	ADCYAP receptor type I	-5.15566	0.0416414		0	0	0	9.18688	10.0052	0	0	0	0	0.014834	0.016262	0
ENSG00000078795	PKD2L2	27039	polycystin 2 like 2, transient receptor potential cation channel	-2.13326	0.0121605		7.3611	12.92	4.34832	30.6229	10.0052	67.6998	0.074215	0.059094	0.054812	0.15291	0.051233	0.424177
ENSG00000079215	SLC1A3	6507	solute carrier family 1 member 3	-1.89508	2.13675e-06	0.000190948	64.4096	24.9172	58.7023	136.782	184.541	228.139	0.403822	0.374824	0.398861	0.652515	0.645773	1.15341
ENSG00000081842	PCDHA6	56142	protocadherin alpha 6	-4.47652	0.00202495		3.68055	0	0	9.18688	71.1482	3.70958	0.013325	0	0	0.029853	0.372148	0.013489
ENSG00000082074	FYB1	2533	FYN binding protein 1	-1.58649	0.0120327		8.28123	29.5315	14.132	74.5158	40.0209	41.7327	0.071384	0.071789	0.032263	0.214126	0.101297	0.104187
ENSG00000082497	SERTAD4	56256	SERTA domain containing 4	-1.64477	0.00112428		14.7222	25.8401	23.9158	77.5781	45.5793	77.9011	0.033365	0.056925	0.115432	0.176819	0.103738	0.175804
ENSG00000084674	APOB	338	apolipoprotein B	-3.40166	0.00975805		0	0	5.4354	20.4153	18.8987	15.7657	0	0	0.003617	0.017209	0.015144	0.012483
ENSG00000087495	PHACTR3	116154	phosphatase and actin regulator 3	-5.6781	0.00340297		0	0	0	8.16611	4.44676	14.8383	0	0	0	0.037634	0.022054	0.076404
ENSG00000089116	LHX5	64211	LIM homeobox 5	-1.36228	0.0409024		7.3611	17.5343	21.7416	45.9344	22.2338	51.0067	0.029624	0.065264	0.08591	0.182517	0.09065	0.202428
ENSG00000089505	CMTM1	113540	CKLF like MARVEL transmembrane domain containing 1	-1.86743	0.0106713		20.243	19.38	35.8736	214.361	23.3455	37.0958	0.327099	0.239916	0.533295	2.83375	0.313981	0.534286
ENSG00000091844	RGS17	26575	regulator of G protein signaling 17	-1.00691	0.00867838		71.7707	54.4487	43.4832	79.6196	132.291	129.835	0.109191	0.083852	0.099815	0.121774	0.295876	0.399665
ENSG00000092847	AGO1	26523	argonaute RISC component 1	1.41541	0.00226857	0.0362406	4748.83	1688.83	4953.82	1453.57	1412.96	1404.07	4.09743	2.573	4.24518	2.22407	2.03646	2.11554
ENSG00000100060	MFNG	4242	MFNG O-fucosylpeptide 3-beta-N-acetylglucosaminyltransferase	1.16548	0.000151223	0.00532849	314.687	222.409	217.416	90.848	90.047	154.875	2.72944	1.65011	1.74341	1.10167	0.846471	1.76403
ENSG00000100092	SH3BP1	23616	SH3 domain binding protein 1	-1.1465	0.0292381	0.181065	1022.27	959.773	1069.69	1421.92	4010.98	1323.39	4.82336	3.9263	5.08605	6.2632	16.2649	5.98588
ENSG00000100292	HMOX1	3162	heme oxygenase 1	-1.10984	1.16242e-18	1.55817e-15	5642.28	4032.89	5008.18	10162.7	10784.5	10742	37.561	26.7624	33.1148	67.068	72.6331	70.8412
ENSG00000101082	SLA2	84174	Src like adaptor 2	-1.62254	0.0491021		11.0416	7.38287	3.26124	28.5814	21.1221	17.6205	0.045843	0.030109	0.010698	0.122941	0.092022	0.073473
ENSG00000101883	RHOXF1	158800	Rhox homeobox family member 1	4.7784	0.0421624		9.20137	1.84572	4.34832	0	0	0	0.139285	0.023718	0.054216	0	0	0
ENSG00000102230	PCYT1B	9468	phosphate cytidylyltransferase 1, choline, beta	3.04001	0.0486775		19.3229	7.38287	8.69664	0	4.44676	0	0.041014	0.016064	0.019251	0	0.010074	0
ENSG00000102962	CCL22	6367	C-C motif chemokine ligand 22	-3.91146	1.01971e-05		3.68055	0	4.34832	30.6229	51.1378	37.0958	0.014863	0	0.01744	0.124424	0.209846	0.150408
ENSG00000103426	CORO7-PAM16	100529144	CORO7-PAM16 readthrough	-1.30278	0.0237383	0.159827	47.8471	65.523	57.6152	298.063	46.691	76.9737	0.292676	0.221391	0.351945	1.20611	0.317029	0.385236
ENSG00000103546	SLC6A2	6530	solute carrier family 6 member 2	-3.7919	0.00993938		0	0	3.26124	8.16611	18.8987	15.7657	0	0	0.009949	0.028564	0.060222	0.049642
ENSG00000104112	SCG3	29106	secretogranin III	5.17675	0.0391188		15.6423	4.6143	0	0	0	0	0.052528	0.012858	0	0	0	0
ENSG00000104833	TUBB4A	10382	tubulin beta 4A class IVa	-1.10972	0.000720308		50.6075	50.7572	60.8765	119.429	118.951	111.287	0.271374	0.27077	0.279498	0.572611	0.620112	0.515534
ENSG00000104953	TLE6	79816	TLE family member 6, subcortical maternal complex member	-1.37723	2.225e-06	0.000196452	84.6526	63.6773	68.486	218.444	174.535	170.64	0.881187	0.811791	1.08529	1.87593	2.35928	1.76074
ENSG00000104967	NOVA2	4858	NOVA alternative splicing regulator 2	-5.50781	0.00643862		0	0	0	5.10382	4.44676	14.8383	0	0	0	0.00625	0.006166	0.022478
ENSG00000105388	CEACAM5	1048	carcinoembryonic antigen related cell adhesion molecule 5	1.31486	0.0498779		41.4062	78.443	93.4889	61.2459	13.3403	11.1287	0.194124	0.366592	0.404211	0.254516	0.055744	0.05394
ENSG00000106692	FKTN	2218	fukutin	1.56782	4.12643e-17	4.05628e-14	2349.11	3341.67	3030.78	1128.97	1098.35	715.948	5.13432	6.62449	6.41463	3.83601	4.1393	3.35963
ENSG00000107831	FGF8	2253	fibroblast growth factor 8	-5.97277	0.00104788		0	0	0	18.3738	8.89353	6.49176	0	0	0	0.296378	0.089327	0.060998
ENSG00000108018	SORCS1	114815	sortilin related VPS10 domain containing receptor 1	-2.0573	0.02906		3.68055	3.69144	4.34832	13.2699	17.7871	17.6205	0.005986	0.005861	0.007024	0.036659	0.031164	0.056265
ENSG00000111913	RIPOR2	9750	RHO family interacting cell polarization regulator 2	-2.64859	0.0274367		0	3.69144	3.26124	12.2492	13.3403	17.6205	0	0.007695	0.004611	0.026412	0.028956	0.035865
ENSG00000114638	UPK1B	7348	uroplakin 1B	-2.13847	0.0243241		5.52082	3.69144	4.34832	16.3322	8.89353	34.3136	0.026079	0.020125	0.024118	0.092097	0.050484	0.187263
ENSG00000114779	ABHD14B	84836	abhydrolase domain containing 14B	1.05464	3.02637e-09	7.43729e-07	1848.56	2595.08	1591.48	1049.35	964.948	892.153	13.9809	17.6142	12.2697	8.11483	7.55558	6.83436
ENSG00000115738	ID2	3398	inhibitor of DNA binding 2	1.02889	0.00159304	0.0286455	243.836	224.255	209.806	160.26	67.8131	103.868	2.41388	1.72029	1.66975	1.51409	0.84648	0.904128
ENSG00000116701	NCF2	4688	neutrophil cytosolic factor 2	-1.08895	1.59178e-07	2.30106e-05	249.357	332.229	242.419	595.106	484.697	673.288	1.42484	1.85777	1.55615	3.49798	2.97361	3.58861
ENSG00000116785	CFHR3	10878	complement factor H related 3	-5.34406	0.00944798		0	0	0	5.10382	5.55845	11.1287	0	0	0	0.024817	0.0325	0.090429
ENSG00000117009	KMO	8564	kynurenine 3-monooxygenase	1.40883	0.0118859	0.106799	126.979	127.355	161.975	21.4361	23.3455	111.287	0.361549	0.327283	0.431167	0.047788	0.320518	0.249613
ENSG00000117115	PADI2	11240	peptidyl arginine deiminase 2	1.16814	0.00361494		81.8922	122.74	85.8793	55.1213	40.0209	34.3136	0.34709	0.324793	0.358964	0.246569	0.110534	0.091283
ENSG00000118160	SLC8A2	6543	solute carrier family 8 member A2	3.00723	0.0255547		22.0833	36.9144	6.52248	8.16611	0	0	0.049848	0.244998	0.014639	0.018634	0	0
ENSG00000118194	TNNT2	7139	troponin T2, cardiac type	-5.13595	0.0440188		0	0	0	12.2492	6.67014	0	0	0	0	0.063386	0.072968	0
ENSG00000118513	MYB	4602	MYB proto-oncogene, transcription factor	-1.05262	0.0326437		32.2048	30.4543	25.0028	87.7857	48.9144	45.4423	0.11355	0.092864	0.077579	0.283743	0.159766	0.242829
ENSG00000118596	SLC16A7	9194	solute carrier family 16 member 7	1.06796	0.0225483	0.156399	1016.75	2206.56	785.959	754.345	581.414	576.839	5.83274	3.5698	4.43506	6.13012	4.15123	3.27786
ENSG00000119401	TRIM32	22954	tripartite motif containing 32	-1.2183	0.00237758	0.037255	567.725	1205.25	1094.69	2405.94	2725.87	1540.4	2.44078	4.02978	3.49243	7.73206	8.81319	4.95865
ENSG00000119919	NKX2-3	159296	NK2 homeobox 3	-1.51733	0.0189106		6.44096	16.6115	23.9158	60.2251	34.4624	38.9505	0.031503	0.091334	0.130219	0.338039	0.191996	0.217047
ENSG00000119950	MXI1	4601	MAX interactor 1, dimerization protein	-1.19332	0.00534167	0.0634003	558.523	1206.18	1428.42	1847.58	2664.72	2788.67	3.87893	5.88799	8.41569	10.8997	13.3115	14.2505
ENSG00000121068	TBX2	6909	T-box 2	-1.21131	0.00356181		59.8089	27.6858	36.9607	91.8688	101.164	95.5216	0.196162	0.092773	0.106758	0.272509	0.314151	0.320421
ENSG00000124120	TTPAL	79183	alpha tocopherol transfer protein like	-1.48735	0.0150577	0.123347	468.35	465.121	458.748	1981.3	415.772	1506.09	2.49779	2.29649	1.88919	3.9779	1.41729	3.31455
ENSG00000125430	HS3ST3B1	9953	heparan sulfate-glucosamine 3-sulfotransferase 3B1	-4.95406	0.0277782		0	0	0	4.08306	8.89353	3.70958	0	0	0	0.009086	0.019923	0.008211
ENSG00000125695	NA	NA	NA	-8.82619	1.20616e-11		0	0	0	117.388	57.8079	68.6272	0	0	0	0.656542	0.322943	0.379394
ENSG00000125726	CD70	970	CD70 molecule	-1.0175	0.00281748	0.0419301	100.295	55.3715	71.7473	136.782	187.876	136.327	1.29612	0.692469	0.909931	1.81272	2.46976	1.78309
ENSG00000125954	CHURC1-FNTB	100529261	CHURC1-FNTB readthrough	1.29692	0.00252661	0.0389288	240.156	271.321	100.011	44.9136	95.6054	108.505	2.26775	2.28208	0.749401	0.288068	0.710384	0.874834
ENSG00000126353	CCR7	1236	C-C motif chemokine receptor 7	-5.51964	0.00542497		0	0	0	12.2492	7.78184	4.63697	0	0	0	0.066048	0.042291	0.02028
ENSG00000126709	IFI6	2537	interferon alpha inducible protein 6	-1.55727	3.41518e-32	1.25892e-28	2143	1773.74	2392.66	6226.66	5581.8	6753.28	30.2579	24.443	33.5651	88.7665	80.0327	95.8413
ENSG00000128714	HOXD13	3239	homeobox D13	1.71541	0.0299679		30.3645	16.6115	23.9158	8.16611	8.89353	4.63697	0.155474	0.085249	0.122917	0.04354	0.047734	0.019674
ENSG00000128965	CHAC1	79094	ChaC glutathione specific gamma-glutamylcyclotransferase 1	1.78634	0.00255248		103.975	47.9887	81.531	13.2699	12.2286	41.7327	0.826082	0.29961	0.655027	0.101957	0.112759	0.262175
ENSG00000129521	EGLN3	112399	egl-9 family hypoxia inducible factor 3	-1.03521	0.00830265	0.0857301	55.2082	102.437	129.363	233.755	114.504	238.34	0.23877	0.527375	0.644653	1.09993	0.691608	1.09122
ENSG00000130224	LRCH2	57631	leucine rich repeats and calponin homology domain containing 2	5.36285	0.0251466		8.28123	14.7657	0	0	0	0	0.017693	0.034591	0	0	0	0
ENSG00000130948	HSD17B3	3293	hydroxysteroid 17-beta dehydrogenase 3	5.53686	0.00474141		4.60068	7.38287	14.132	0	0	0	0.03615	0.07511	0.135019	0	0	0
ENSG00000131885	NA	NA	NA	-5.20285	0.0146814		0	0	0	7.14535	3.33507	9.27394	0	0	0	0.096532	0.048982	0.068888
ENSG00000132437	DDC	1644	dopa decarboxylase	-2.2429	0.000204611		7.3611	11.0743	9.78372	48.9967	45.5793	38.9505	0.041663	0.062653	0.050056	0.436293	0.267156	0.236831
ENSG00000132854	KANK4	163782	KN motif and ankyrin repeat domains 4	-1.20496	9.07687e-06	0.000637326	129.739	83.0573	107.621	254.17	273.476	211.446	0.355589	0.29253	0.384708	0.972585	0.712475	0.671889
ENSG00000133466	C1QTNF6	114904	C1q and TNF related 6	1.06746	4.69638e-08	7.78068e-06	4421.26	5444.87	2736.18	1971.1	2092.2	1951.24	19.3084	22.4556	14.3905	10.6563	11.3958	9.53617
ENSG00000134827	TCN1	6947	transcobalamin 1	-5.78082	0.00988913		0	0	0	18.3738	0	11.1287	0	0	0	0.203213	0	0.08357
ENSG00000135097	MSI1	4440	musashi RNA binding protein 1	-6.05693	0.000564348		0	0	0	12.2492	13.3403	10.2013	0	0	0	0.048956	0.053672	0.040042
ENSG00000135100	HNF1A	6927	HNF1 homeobox A	-6.27965	0.00030026		0	0	0	17.353	18.8987	5.56436	0	0	0	0.066265	0.063637	0.075627
ENSG00000135114	OASL	8638	2'-5'-oligoadenylate synthetase like	-1.27261	3.6509e-26	6.72906e-23	3955.67	3211.55	3878.7	9607.43	7887.45	9188.62	17.6215	13.4109	18.1386	42.8668	36.334	40.0255
ENSG00000135503	ACVR1B	91	activin A receptor type 1B	-1.22339	0.00444014	0.0564882	2350.95	979.153	1003.37	3723.75	3336.18	3059.47	8.91536	6.78579	6.64409	14.8438	9.57521	11.8989
ENSG00000135697	BCO1	53630	beta-carotene oxygenase 1	5.15864	0.016028		3.68055	11.9972	4.34832	0	0	0	0.045872	0.047893	0.015636	0	0	0
ENSG00000135702	CHST5	23563	carbohydrate sulfotransferase 5	2.25802	0.0269697		44.1666	16.6115	19.5674	9.18688	7.78184	0	0.158393	0.057832	0.18672	0.030056	0.081285	0
ENSG00000135932	CAB39	51719	calcium binding protein 39	1.07227	3.20372e-26	6.72906e-23	4134.18	4398.35	4008.06	2049.69	2067.74	1848.3	13.6495	13.9024	13.1323	6.77634	7.22008	6.15463
ENSG00000136010	ALDH1L2	160428	aldehyde dehydrogenase 1 family member L2	1.43981	1.97731e-27	4.85924e-24	1495.22	1552.25	1490.39	614.5	493.591	563.856	2.65358	2.70038	2.73552	1.33681	0.897516	0.92313
ENSG00000136514	RTP4	64108	receptor transporter protein 4	-6.33558	0.000302381		0	0	0	4.08306	18.8987	20.4027	0	0	0	0.03138	0.137613	0.155972
ENSG00000137507	LRRC32	2615	leucine rich repeat containing 32	-1.41835	0.00030523	0.00900124	36.8055	124.586	122.84	259.274	271.253	228.139	0.224242	0.67492	0.903777	0.736058	0.771577	0.759418
ENSG00000137959	IFI44L	10964	interferon induced protein 44 like	-1.56427	7.70817e-10	2.27314e-07	128.819	182.726	101.098	374.621	393.539	454.423	0.747841	0.38915	0.350264	1.38406	1.17856	1.33533
ENSG00000138336	TET1	80312	tet methylcytosine dioxygenase 1	-3.17707	0.0303092		0	0	5.4354	23.4776	4.44676	19.4753	0	0	0.0055	0.028877	0.005737	0.023724
ENSG00000139410	SDSL	113675	serine dehydratase like	1.02795	0.00169743	0.0299744	182.187	124.586	210.893	96.9726	64.4781	91.812	1.49293	0.98475	1.71954	0.838428	0.539273	0.844087
ENSG00000139626	ITGB7	3695	integrin subunit beta 7	1.6185	0.00292033		46.0068	84.903	92.4018	16.3322	40.0209	16.6931	0.213518	0.983498	0.96518	0.132407	0.229531	0.064397
ENSG00000140488	CELF6	60677	CUGBP Elav-like family member 6	5.24056	0.0358058		17.4826	3.69144	0	0	0	0	0.058643	0.012743	0	0	0	0
ENSG00000141314	RHBDL3	162494	rhomboid like 3	-1.08479	0.000131527	0.00477678	78.2116	91.363	85.8793	148.011	205.663	188.261	0.29885	0.224052	0.253393	0.394409	0.529886	0.537312
ENSG00000141469	SLC14A1	6563	solute carrier family 14 member 1 (Kidd blood group)	5.46057	0.0213253		0	7.38287	17.3933	0	0	0	0	0.029954	0.051412	0	0	0
ENSG00000141979	NA	NA	NA	5.83998	0.00339712		239.236	13.8429	39.1349	5.10382	0	0	1.1001	0.061361	0.178657	0.019467	0	0
ENSG00000142606	MMEL1	79258	membrane metalloendopeptidase like 1	1.18774	0.0153764		50.6075	71.983	89.1406	44.9136	26.6806	21.3301	0.375682	0.565104	0.627845	0.485282	0.181368	0.231193
ENSG00000142611	PRDM16	63976	PR/SET domain 16	5.50094	0.0189571		15.6423	0	9.78372	0	0	0	0.020038	0	0.011757	0	0	0
ENSG00000142920	AZIN2	113451	antizyme inhibitor 2	-1.28938	0.000868677		41.4062	42.4515	38.0478	96.9726	125.621	76.0463	0.524851	0.28509	0.262999	0.68382	0.850673	0.449425
ENSG00000143603	KCNN3	3782	potassium calcium-activated channel subfamily N member 3	5.40309	0.00873911		3.68055	15.6886	4.34832	0	0	0	0.003334	0.013058	0.003912	0	0	0
ENSG00000143851	PTPN7	5778	protein tyrosine phosphatase non-receptor type 7	-6.19628	0.000405762		0	0	0	12.2492	6.67014	20.4027	0	0	0	0.097171	0.044197	0.061464
ENSG00000144063	MALL	7851	mal, T cell differentiation protein like	1.22977	0.0295891		49.6874	34.1458	55.4411	26.5399	12.2286	20.4027	0.191353	0.128737	0.208601	0.102995	0.043664	0.078968
ENSG00000144278	GALNT13	114805	polypeptide N-acetylgalactosaminyltransferase 13	-2.05492	0.0482287		11.0416	4.6143	0	19.3945	28.904	17.6205	0.023591	0.0077	0	0.041695	0.061098	0.035932
ENSG00000145103	ILDR1	286676	immunoglobulin like domain containing receptor 1	-5.29389	0.012487		0	0	0	4.08306	13.3403	3.70958	0	0	0	0.01834	0.060319	0.016574
ENSG00000145242	EPHA5	2044	EPH receptor A5	-1.19536	0.0123577		23.0034	33.2229	32.6124	81.6611	43.3559	77.9011	0.031294	0.045555	0.045216	0.115413	0.060632	0.144317
ENSG00000145431	PDGFC	56034	platelet derived growth factor C	-1.77458	0.00282317		40.486	45.2201	5.4354	78.5989	107.834	127.053	0.114903	0.122808	0.013248	0.310374	0.310249	0.391947
ENSG00000146151	HMGCLL1	54511	3-hydroxymethyl-3-methylglutaryl-CoA lyase like 1	1.46877	0.0324341		20.243	56.2944	73.9214	30.6229	14.452	9.27394	0.091297	0.256685	0.345193	0.14906	0.06532	0.039187
ENSG00000146233	CYP39A1	51302	cytochrome P450 family 39 subfamily A member 1	-1.01123	2.68791e-05	0.0014679	135.26	116.28	121.753	236.817	226.785	288.42	0.908046	0.588024	0.627665	1.29517	1.19908	1.57299
ENSG00000147174	GCNA	93953	germ cell nuclear acidic peptidase	1.00582	0.000816878	0.0179182	322.968	299.929	195.674	93.9103	154.525	159.512	1.7037	1.17662	0.856883	0.388483	0.727849	0.776407
ENSG00000150783	TEX12	56158	testis expressed 12	5.73774	0.0112215		8.28123	0	21.7416	0	0	0	0.075907	0	0.222677	0	0	0
ENSG00000151611	MMAA	166785	metabolism of cobalamin associated A	1.01122	0.00377282	0.0515572	186.788	149.503	222.851	76.5573	64.4781	135.4	0.425296	0.598249	0.915081	0.214041	0.177532	0.302224
ENSG00000152086	TUBA3E	112714	tubulin alpha 3e	-5.1781	0.0394159		0	0	0	0	11.1169	8.34655	0	0	0	0	0.086677	0.06235
ENSG00000152380	FAM151B	167555	family with sequence similarity 151 member B	1.05766	0.0124279		93.854	64.6001	65.2248	30.6229	38.9092	38.0232	0.985648	0.712157	0.614886	0.237303	0.299228	0.518065
ENSG00000152527	PLEKHH2	130271	pleckstrin homology, MyTH4 and FERM domain containing H2	-1.17628	9.68628e-07	9.65028e-05	134.34	130.123	97.8372	289.897	269.029	261.525	0.294255	0.304817	0.163735	0.704635	0.498262	0.611421
ENSG00000153253	SCN3A	6328	sodium voltage-gated channel alpha subunit 3	-3.00778	0.000610601		4.60068	8.30573	0	34.706	31.1273	39.8779	0.004772	0.009344	0	0.104746	0.041021	0.050863
ENSG00000153822	KCNJ16	3773	potassium voltage-gated channel subfamily J member 16	1.12226	0.00199785	0.0337082	108.576	172.575	160.888	74.5158	44.4676	83.4655	0.305788	0.48695	0.484577	0.234881	0.137838	0.263292
ENSG00000154133	ROBO4	54538	roundabout guidance receptor 4	-5.36016	0.0270267		0	0	0	0	10.0052	12.0561	0	0	0	0	0.022702	0.02807
ENSG00000154839	SKA1	220134	spindle and kinetochore associated complex subunit 1	1.23208	8.86124e-06	0.000627401	1315.8	511.264	1133.82	469.552	406.879	383.941	6.37703	4.8245	5.30467	3.32051	4.35494	3.9733
ENSG00000155792	DEPTOR	64798	DEP domain containing MTOR interacting protein	-1.93182	0.00110211		8.28123	39.6829	18.4804	122.492	71.1482	60.2806	0.037903	0.175296	0.093234	0.563802	0.33297	0.439081
ENSG00000155886	SLC24A2	25769	solute carrier family 24 member 2	5.0875	0.0475651		14.7222	0	4.34832	0	0	0	0.0162	0	0.004721	0	0	0
ENSG00000156453	PCDH1	5097	protocadherin 1	-1.33605	1.18398e-08	2.3666e-06	607.29	1000.38	866.403	2403.9	1325.14	2515.09	1.83061	2.75192	2.41645	7.35182	3.93143	7.57823
ENSG00000156574	NODAL	4838	nodal growth differentiation factor	-1.41034	0.0158331		24.8437	20.3029	34.7866	78.5989	107.834	25.967	0.17239	0.137897	0.238144	0.562869	0.771856	0.185103
ENSG00000156804	FBXO32	114907	F-box protein 32	-1.00451	0.0115541	0.104455	57.9686	85.8259	136.972	110.243	212.333	239.268	0.215155	0.257398	1.17036	0.726242	0.594507	0.898397
ENSG00000157734	SNX22	79856	sorting nexin 22	-5.41218	7.12717e-06	0.000517686	18.4027	23.0715	16.3062	1450.51	33.3507	977.473	0.106203	0.071172	0.062788	5.137	0.120846	3.44217
ENSG00000157927	RADIL	55698	Rap associating with DIL domain	2.87882	0.000390723		29.4444	20.3029	40.222	4.08306	4.44676	3.70958	0.061356	0.039542	0.083202	0.008602	0.009431	0.007774
ENSG00000159166	LAD1	3898	ladinin 1	6.46207	6.25808e-05		15.6423	17.5343	16.3062	0	0	0	0.308196	0.066592	0.099679	0	0	0
ENSG00000161682	FAM171A2	284069	family with sequence similarity 171 member A2	-1.05136	2.79968e-08	5.18611e-06	388.298	333.152	353.301	740.054	892.688	596.314	1.59361	1.32568	1.59214	2.97399	3.52982	2.37048
ENSG00000161992	PRR35	146325	proline rich 35	-5.79995	0.00330189		0	0	0	4.08306	22.2338	3.70958	0	0	0	0.022006	0.118318	0.019887
ENSG00000162073	PAQR4	124222	progestin and adipoQ receptor family member 4	-1.17634	8.29348e-35	4.07625e-31	3769.8	3250.31	3424.3	8085.47	7846.31	7674.18	17.4428	15.4719	15.8007	41.7505	42.3578	43.1085
ENSG00000162344	FGF19	9965	fibroblast growth factor 19	-1.4406	0.00145727		34.0451	36.9144	17.3933	78.5989	72.2599	89.9572	0.160112	0.174192	0.083502	0.378643	0.351625	0.43439
ENSG00000162444	RBP7	116362	retinol binding protein 7	-5.80287	0.00182404		0	0	0	8.16611	14.452	7.41915	0	0	0	0.113276	0.242614	0.101117
ENSG00000162526	TSSK3	81629	testis specific serine kinase 3	-1.84162	0.000732905	0.0166001	78.2116	59.9858	47.8315	213.34	404.655	50.0793	0.826435	0.803199	0.678385	2.44282	4.03866	0.61478
ENSG00000163349	HIPK1	204851	homeodomain interacting protein kinase 1	1.0188	2.55593e-07	3.42611e-05	4623.69	9241.51	8345.51	3389.96	3690.81	3880.22	12.5978	20.4274	14.8967	9.08911	6.04176	6.25956
ENSG00000163810	TGM4	7047	transglutaminase 4	-2.17252	0.0404188		4.60068	11.0743	0	12.2492	21.1221	38.0232	0.012849	0.035604	0	0.042511	0.080638	0.174037
ENSG00000164053	ATRIP//ATRIP-TREX1	84126//111822955	ATR interacting protein//ATRIP-TREX1 readthrough	-1.01285	0.0418913	0.224614	525.398	705.987	320.689	1109.57	1459.65	563.856	2.83476	3.97357	1.90032	5.72332	7.17465	2.78813
ENSG00000164708	PGAM2	5224	phosphoglycerate mutase 2	-3.45304	0.0450326		0	2.76858	0	3.06229	5.55845	22.2575	0	0.026808	0	0.030622	0.073495	0.297611
ENSG00000165156	ZHX1	11244	zinc fingers and homeoboxes 1	1.1911	0.00362099	0.0500451	2698.76	1245.86	3243.85	1127.94	901.581	1118.44	10.8808	6.25985	9.33836	5.61051	5.47678	6.05827
ENSG00000165409	TSHR	7253	thyroid stimulating hormone receptor	-5.12722	0.0190475		0	0	0	3.06229	11.1169	4.63697	0	0	0	0.00757	0.172743	0.13234
ENSG00000165521	EML5	161436	EMAP like 5	5.62605	0.0143165		7.3611	20.3029	0	0	0	0	0.00832	0.049773	0	0	0	0
ENSG00000165685	TMEM52B	120939	transmembrane protein 52B	-1.17439	0.037477		25.7638	11.0743	25.0028	55.1213	43.3559	40.8053	0.111528	0.09497	0.413422	0.531921	0.230818	0.380797
ENSG00000165917	RAPSN	5913	receptor associated protein of the synapse	1.27321	0.0176031		62.5693	32.3001	54.354	19.3945	20.0104	22.2575	0.484422	0.218955	0.380819	0.135526	0.168429	0.158102
ENSG00000165949	IFI27	3429	interferon alpha inducible protein 27	-1.55832	1.49542e-18	1.69615e-15	193.229	216.872	218.503	675.746	554.734	619.499	3.56187	3.46238	3.70528	13.8382	10.1601	10.7
ENSG00000166192	SENP8	123228	SUMO peptidase family member, NEDD8 specific	1.7044	0.0114862		79.1318	60.9087	60.8765	3.06229	35.5741	23.1848	0.229412	0.171949	0.203873	0.044652	0.09974	0.066475
ENSG00000166225	FRS2	10818	fibroblast growth factor receptor substrate 2	1.42463	0.00064151	0.0151648	2603.99	3010.37	1142.52	784.968	957.166	775.301	7.29756	7.49984	8.25152	6.40335	7.63793	5.78254
ENSG00000166428	PLD4	122618	phospholipase D family member 4	-1.64431	0.0497962		6.44096	14.7657	5.4354	51.0382	17.7871	14.8383	0.010382	0.02617	0.007841	0.37277	0.032824	0.027057
ENSG00000166473	PKD1L2	114780	polycystin 1 like 2 (gene/pseudogene)	-1.11163	0.026838		51.5277	36.9144	26.0899	127.596	73.3716	47.2971	0.101661	0.055441	0.061225	0.834352	0.190571	0.092926
ENSG00000166501	PRKCB	5579	protein kinase C beta	-1.17155	0.00650591	0.0724407	57.0485	86.7488	61.9636	248.046	80.0417	135.4	0.281242	0.409078	0.296993	0.46588	0.276642	0.666176
ENSG00000166507	NDST2	8509	N-deacetylase and N-sulfotransferase 2	1.12478	7.91888e-14	5.07669e-11	1579.88	1565.17	2068.71	733.93	862.672	793.849	10.0887	8.00627	11.9924	6.27703	7.27761	5.57054
ENSG00000166589	CDH16	1014	cadherin 16	1.5722	1.04357e-08	2.19821e-06	281.562	237.175	233.722	72.4743	73.3716	106.65	1.17508	1.03201	0.777246	0.367707	0.454378	0.403876
ENSG00000166920	C15orf48	84419	chromosome 15 open reading frame 48	-5.35601	0.00971989		0	0	0	11.2284	3.33507	7.41915	0	0	0	0.14528	0.04165	0.100181
ENSG00000166923	GREM1	26585	gremlin 1, DAN family BMP antagonist	-1.3476	0.0443901		12.8819	29.5315	8.69664	32.6645	66.7014	31.5314	0.010432	0.023346	0.006995	0.02671	0.054783	0.025626
ENSG00000166927	MS4A7	58475	membrane spanning 4-domains A7	5.6249	0.0134332		15.6423	11.9972	0	0	0	0	0.114372	0.069285	0	0	0	0
ENSG00000167447	SMG8	55181	SMG8 nonsense mediated mRNA decay factor	-1.38524	1.64661e-11	7.21702e-09	581.527	812.116	612.026	2330.4	1464.1	1445.81	2.54648	3.17745	2.84358	8.53037	6.92517	6.33304
ENSG00000167550	RHEBL1	121268	RHEB like 1	-1.00369	4.04431e-06	0.000333147	506.995	301.775	577.239	928.896	949.384	898.645	5.03841	2.9404	5.69432	9.2563	9.40286	8.92367
ENSG00000167617	CDC42EP5	148170	CDC42 effector protein 5	-1.03079	0.00070103	0.0159763	84.6526	62.7544	94.5759	156.177	147.855	189.188	1.19993	0.850938	1.36907	2.24581	2.10642	2.59741
ENSG00000167656	LY6D	8581	lymphocyte antigen 6 family member D	4.17586	0.00238561		33.1249	3.69144	36.9607	4.08306	0	0	0.420977	0.029954	0.557636	0.034269	0	0
ENSG00000168000	BSCL2	26580	BSCL2 lipid droplet biogenesis associated, seipin	1.04498	7.32179e-08	1.14851e-05	1247.71	1939.85	1616.49	678.808	967.171	683.489	13.227	17.7968	16.0557	7.41616	9.64867	7.23547
ENSG00000168481	LGI3	203190	leucine rich repeat LGI family member 3	-1.31998	0.00329925		19.3229	54.4487	53.2669	92.8896	112.281	111.287	0.049245	0.336949	0.18615	0.329382	0.302048	0.321316
ENSG00000168564	CDKN2AIP	55602	CDKN2A interacting protein	2.40525	2.10344e-90	3.10153e-86	2475.17	2568.32	2561.16	479.759	521.383	435.875	11.6588	11.4639	12.1063	3.15224	3.92385	2.77759
ENSG00000169035	KLK7	5650	kallikrein related peptidase 7	5.47334	0.0192151		11.9618	12.92	0	0	0	0	0.108812	0.080191	0	0	0	0
ENSG00000169248	CXCL11	6373	C-X-C motif chemokine ligand 11	-1.41614	0.0205825		29.4444	15.6886	8.69664	53.0797	35.5741	55.6436	0.216579	0.124595	0.063296	0.394434	0.26587	0.41124
ENSG00000169302	STK32A	202374	serine/threonine kinase 32A	-2.34414	0.0363692		4.60068	4.6143	0	17.353	14.452	15.7657	0.008072	0.007904	0	0.100069	0.09986	0.032686
ENSG00000169403	PTAFR	5724	platelet activating factor receptor	5.75739	0.00179849		11.0416	7.38287	11.9579	0	0	0	0.028983	0.018919	0.028436	0	0	0
ENSG00000169836	TACR3	6870	tachykinin receptor 3	-5.09353	0.0463792		0	0	0	0	10.0052	8.34655	0	0	0	0	0.020602	0.016982
ENSG00000169876	MUC17	140453	mucin 17, cell surface associated	-1.36833	0.0155604		11.0416	39.6829	19.5674	69.412	56.6962	55.6436	0.009126	0.057517	0.016063	0.092722	0.079154	0.125494
ENSG00000169989	TIGD4	201798	tigger transposable element derived 4	-1.74612	0.0141678		15.6423	3.69144	13.045	44.9136	30.0157	33.3862	0.071815	0.017243	0.061511	0.212095	0.142235	0.160328
ENSG00000170703	TTLL6	284076	tubulin tyrosine ligase like 6	-1.34445	0.00530538		22.0833	46.143	31.5253	79.6196	55.5845	117.779	0.058694	0.154775	0.08095	0.299529	0.148349	0.469623
ENSG00000170915	PAQR8	85315	progestin and adipoQ receptor family member 8	-1.48024	0.00637247	0.071454	37.7256	12.92	88.0535	131.679	130.068	123.343	0.205495	0.156627	0.22215	0.331837	0.327393	0.308329
ENSG00000171130	ATP6V0E2	155066	ATPase H+ transporting V0 subunit e2	1.51432	0.00513473	0.0619297	695.624	417.132	1505.61	302.146	286.816	327.37	3.46751	4.09579	8.05544	2.20053	2.60186	2.47137
ENSG00000171401	KRT13	3860	keratin 13	-5.04054	0.0248398		0	0	0	9.18688	6.67014	1.85479	0	0	0	0.055864	0.041478	0.041186
ENSG00000171766	GATM	2628	glycine amidinotransferase	5.24659	0.0328243		0	8.30573	13.045	0	0	0	0	0.057134	0.11052	0	0	0
ENSG00000171903	CYP4F11	57834	cytochrome P450 family 4 subfamily F member 11	1.51757	0.0106142		70.8505	44.2972	45.6574	20.4153	27.7923	8.34655	0.261314	0.159477	0.173118	0.078662	0.102222	0.031353
ENSG00000172482	AGXT	189	alanine--glyoxylate and serine--pyruvate aminotransferase	-5.67977	0.00375768		0	0	0	17.353	5.55845	4.63697	0	0	0	0.080989	0.020266	0.02363
ENSG00000172789	HOXC5	3222	homeobox C5	2.29301	0.000108381	0.0041401	62.5693	190.109	387	19.3945	78.93	32.4588	0.404181	1.21379	2.51497	0.123723	0.525344	0.210673
ENSG00000173212	MAB21L3	126868	mab-21 like 3	-1.24407	0.00905022		45.0867	44.2972	21.7416	81.6611	124.509	58.4258	0.16268	0.158407	0.078062	0.299149	0.462105	0.213045
ENSG00000174502	SLC26A9	115019	solute carrier family 26 member 9	1.07094	0.0112414		89.2533	108.897	106.534	64.3082	25.5689	54.7162	0.219296	0.29058	0.401868	0.159352	0.133731	0.167151
ENSG00000175155	YPEL2	388403	yippee like 2	-1.91876	0.0418283	0.224366	96.6144	74.7516	103.273	113.305	106.722	817.961	0.266651	0.35511	0.844531	0.582809	0.562214	2.12015
ENSG00000175161	CADM2	253559	cell adhesion molecule 2	-6.19791	0.00321312		0	0	0	0	25.5689	13.9109	0	0	0	0	0.290813	0.159538
ENSG00000175170	NA	NA	NA	-1.19319	0.00166815	0.0295759	65.3297	144.889	57.6152	168.426	247.907	197.535	1.02483	1.53579	0.963863	1.80879	2.62617	1.67154
ENSG00000175267	VWA3A	146177	von Willebrand factor A domain containing 3A	5.22347	0.0124337		5.52082	11.0743	4.34832	0	0	0	0.012791	0.027799	0.011105	0	0	0
ENSG00000175604	NA	NA	NA	-5.45818	0.00607339		0	0	0	7.14535	10.0052	6.49176	0	0	0	0.037056	0.058438	0.036325
ENSG00000176046	NUPR1	26471	nuclear protein 1, transcriptional regulator	1.13469	3.53118e-08	6.27316e-06	350.572	328.538	350.04	170.468	141.185	156.73	1.42406	1.47246	0.782182	0.961147	0.635971	1.04306
ENSG00000176641	RNF152	220441	ring finger protein 152	-5.92875	0.00149777		0	0	0	8.16611	20.0104	4.63697	0	0	0	0.010265	0.025322	0.004638
ENSG00000176909	MAMSTR	284358	MEF2 activating motif and SAP domain containing transcriptional regulator	-1.44541	2.4378e-05	0.00137722	53.3679	43.3744	67.399	125.554	183.429	137.254	0.340914	0.268928	0.428204	0.811357	1.19477	0.885659
ENSG00000177418	NA	NA	NA	-5.57457	0.0256208		0	0	0	24.4983	1.11169	0	0	0	0	0.592933	0.020302	0
ENSG00000177511	ST8SIA3	51046	ST8 alpha-N-acetyl-neuraminide alpha-2,8-sialyltransferase 3	2.04095	0.00313149		30.3645	31.3772	39.1349	5.10382	11.1169	8.34655	0.029431	0.030031	0.038852	0.004121	0.01091	0.007751
ENSG00000178021	TSPYL6	388951	TSPY like 6	5.51225	0.0187641		8.28123	0	17.3933	0	0	0	0.030346	0	0.066147	0	0	0
ENSG00000178795	GDPD4	220032	glycerophosphodiester phosphodiesterase domain containing 4	-5.31362	0.0303628		0	0	0	9.18688	12.2286	0	0	0	0	0.041133	0.053294	0
ENSG00000178809	TRIM73	375593	tripartite motif containing 73	1.00607	0.00720841	0.0774129	159.184	137.506	160.888	40.8306	105.611	81.6107	1.47576	1.52635	3.27384	0.245908	0.776346	0.723408
ENSG00000179010	MRFAP1	93621	Morf4 family associated protein 1	-1.21105	0.0105969	0.0988512	5527.26	4273.76	5195.15	15325.8	5168.25	14222.5	34.736	24.8272	31.0095	89.8749	31.5414	83.1757
ENSG00000179023	KLHDC7A	127707	kelch domain containing 7A	1.22571	9.41038e-06	0.00065451	491.353	307.312	345.691	189.862	113.392	185.479	1.12866	0.689672	0.788026	0.440609	0.264212	0.428159
ENSG00000179082	NA	NA	NA	5.20193	0.0124029		4.60068	7.38287	8.69664	0	0	0	0.013842	0.027106	0.032485	0	0	0
ENSG00000180035	ZNF48	197407	zinc finger protein 48	-1.19495	0.0411483	0.222427	288.003	344.226	239.158	562.441	1160.61	272.654	1.29663	1.36838	0.902324	2.18548	4.26491	1.10637
ENSG00000180422	LINC00304	283860	long intergenic non-protein coding RNA 304	-1.18643	0.00195469	0.033205	48.7673	168.883	125.014	218.444	291.263	269.872	0.451114	0.916219	0.971024	1.77322	1.92759	1.94249
ENSG00000181227	NA	NA	NA	1.08436	0.0164738		48.7673	91.363	92.4018	34.706	44.4676	30.604	0.425038	0.778829	0.797672	0.299891	0.391821	0.26179
ENSG00000181626	ANKRD62	342850	ankyrin repeat domain 62	-1.27218	0.00672315		24.8437	28.6086	22.8287	47.9759	74.4833	62.1354	0.096938	0.109519	0.066739	0.192121	0.305295	0.248403
ENSG00000181856	SLC2A4	6517	solute carrier family 2 member 4	-1.48827	0.00401361		11.0416	36.9144	34.7866	84.7234	74.4833	72.3367	0.03812	0.124332	0.115932	0.293784	0.258158	0.25082
ENSG00000182156	ENPP7	339221	ectonucleotide pyrophosphatase/phosphodiesterase 7	2.23054	0.0385399		21.1632	12.92	23.9158	0	7.78184	4.63697	0.11857	0.06964	0.134722	0	0.04403	0.024738
ENSG00000182492	BGN	633	biglycan	-5.18165	0.0414158		0	0	0	5.10382	14.452	0	0	0	0	0.020302	0.066773	0
ENSG00000182648	LOC285889//LINC01006	285889//100506380	uncharacterized LOC285889//long intergenic non-protein coding RNA 1006	-2.16384	8.4614e-11	3.19906e-08	34.9652	41.5287	50.0057	234.776	152.302	178.06	0.619666	0.72678	0.885896	1.35991	0.885842	1.14821
ENSG00000182747	SLC35D3	340146	solute carrier family 35 member D3	5.05646	0.04959		4.60068	0	14.132	0	0	0	0.018454	0	0.064963	0	0	0
ENSG00000182993	C12orf60	144608	chromosome 12 open reading frame 60	1.07183	0.0232558		79.1318	87.6716	80.4439	53.0797	17.7871	46.3697	0.498936	0.506321	0.60855	0.326518	0.126989	0.303568
ENSG00000183476	SH2D7	646892	SH2 domain containing 7	-2.69901	0.0049927		0	7.38287	5.4354	31.6437	23.3455	27.8218	0	0.029912	0.018575	0.135741	0.098167	0.120142
ENSG00000183876	ARSI	340075	arylsulfatase family member I	-7.52793	1.05283e-07		0	0	0	36.7475	35.5741	26.8944	0	0	0	0.138844	0.135305	0.097591
ENSG00000183971	NPW	283869	neuropeptide W	-1.26157	0.00115977		37.7256	48.9115	31.5253	83.7027	106.722	93.6668	0.61659	0.647233	0.363408	1.05903	1.45423	1.37318
ENSG00000184156	KCNQ3	3786	potassium voltage-gated channel subfamily Q member 3	-1.10699	0.00802455	0.0838569	217.152	103.36	84.7922	377.683	137.85	357.974	0.22359	0.169245	0.237588	0.393612	0.392953	0.379794
ENSG00000184313	MROH7	374977	maestro heat like repeat family member 7	2.28303	0.000221525		41.4062	42.4515	57.6152	11.2284	5.55845	12.0561	0.107715	0.130661	0.146567	0.036603	0.018413	0.073245
ENSG00000184350	MRGPRE	116534	MAS related GPR family member E	-5.14802	0.043867		0	0	0	0	14.452	4.63697	0	0	0	0	0.113831	0.031277
ENSG00000184357	HIST1H1B	3009	histone cluster 1 H1 family member b	2.99934	0.00338827		7.3611	15.6886	76.0956	6.12459	4.44676	1.85479	0.120604	0.263927	1.30844	0.103832	0.07144	0.032356
ENSG00000184860	SDR42E1	93517	short chain dehydrogenase/reductase family 42E, member 1	1.06116	0.0183485	0.138798	354.253	281.472	172.846	60.2251	85.6002	241.122	1.02408	0.64647	0.683339	0.818388	0.979661	1.37051
ENSG00000184988	TMEM106A	113277	transmembrane protein 106A	1.28668	4.39706e-07	5.18678e-05	348.732	358.992	358.736	120.45	198.993	118.706	1.68754	1.74331	1.93538	1.16318	0.978451	0.589709
ENSG00000184995	IFNE	338376	interferon epsilon	1.41956	0.0107197		36.8055	51.6801	70.6602	26.5399	20.0104	12.9835	0.291005	0.404284	0.557691	0.208726	0.161414	0.104173
ENSG00000185046	ANKS1B	56899	ankyrin repeat and sterile alpha motif domain containing 1B	-2.49896	0.0353936		4.60068	0	5.4354	5.10382	28.904	22.2575	0.061415	0	0.030984	0.023166	0.359441	0.156239
ENSG00000185198	PRSS57	400668	serine protease 57	-5.55114	0.0183289		0	0	0	16.3322	8.89353	0	0	0	0	0.178955	0.092137	0
ENSG00000185432	METTL7A	25840	methyltransferase like 7A	1.20272	0.0296616	0.183073	701.144	1849.41	665.293	514.465	305.715	576.839	2.9778	6.28726	3.13314	2.35412	1.74086	2.58757
ENSG00000185668	POU3F1	5453	POU class 3 homeobox 1	-5.71453	0.00311703		0	0	0	16.3322	4.44676	7.41915	0	0	0	0.065393	0.018013	0.029647
ENSG00000185728	YTHDF3	253943	YTH N6-methyladenosine RNA binding protein 3	1.38117	0.010441	0.0979964	2175.2	4344.82	1142.52	880.92	1081.68	979.328	7.29932	16.2598	4.22405	3.42461	3.36332	3.21934
ENSG00000186272	ZNF17	7565	zinc finger protein 17	1.217	0.00200198	0.0337361	160.104	604.473	646.813	237.838	207.886	161.367	1.22924	2.95638	2.97803	1.33348	1.89115	1.47263
ENSG00000186369	NA	NA	NA	-5.45601	0.0224707		0	0	0	9.18688	14.452	0	0	0	0	0.030037	0.219745	0
ENSG00000186377	CYP4X1	260293	cytochrome P450 family 4 subfamily X member 1	1.25623	0.00970628		66.2499	102.437	51.0928	22.4568	41.1326	28.7492	0.332205	0.52565	0.267593	0.167219	0.209132	0.142522
ENSG00000186676	NA	NA	NA	-2.89475	0.0271222		0	7.38287	0	21.4361	16.6754	17.6205	0	0.065408	0	0.190967	0.147312	0.15305
ENSG00000187492	CDHR4	389118	cadherin related family member 4	-1.18273	0.0433558		13.8021	25.8401	15.2191	51.0382	30.0157	43.5875	0.063227	0.158664	0.067065	0.512167	0.276328	0.415529
ENSG00000187608	ISG15	9636	ISG15 ubiquitin like modifier	-1.02063	1.81826e-27	4.85924e-24	6489.73	6295.74	6687.72	14358.1	12396.5	12750.7	107.882	102.023	110.245	240.466	209.228	212.656
ENSG00000187699	C2orf88	84281	chromosome 2 open reading frame 88	-1.59228	0.0302132		9.20137	13.8429	46.7444	73.495	115.616	20.4027	0.174559	0.103925	0.186426	0.216035	0.344445	0.235265
ENSG00000187997	C17orf99	100141515	chromosome 17 open reading frame 99	-1.67237	0.0301436		6.44096	8.30573	6.52248	18.3738	24.4572	25.0396	0.197036	0.049779	0.029683	0.08851	0.374595	0.283971
ENSG00000188223	NA	NA	NA	8.16773	0.0366353		0	88.5945	72.8344	0	0	0	0	0.981768	0.818177	0	0	0
ENSG00000188501	LCTL	197021	lactase like	-1.51904	0.0011683		31.2847	21.2258	21.7416	53.0797	75.595	84.3928	0.182431	0.097386	0.129302	0.197824	0.286372	0.315632
ENSG00000188536	HBA2	3040	hemoglobin subunit alpha 2	1.48312	0.00248646		57.9686	73.8287	63.0506	30.6229	24.4572	14.8383	1.14299	1.40791	1.2613	0.600184	0.514348	0.320624
ENSG00000188629	ZNF177	7730	zinc finger protein 177	1.02919	0.0423013		75.4512	69.2144	75.0085	27.5606	61.143	19.4753	0.466768	0.530201	0.573362	0.191779	0.438736	0.291369
ENSG00000188676	IDO2	169355	indoleamine 2,3-dioxygenase 2	2.87775	0.00768472		26.684	15.6886	17.3933	0	4.44676	3.70958	0.132977	0.041286	0.045725	0	0.012496	0.010335
ENSG00000196227	FAM217B	63939	family with sequence similarity 217 member B	1.68856	0.0196615	0.144233	450.867	399.598	1887.17	252.129	323.502	273.581	2.20497	1.64725	4.81074	1.49213	1.29845	1.56334
ENSG00000196341	OR8D1	283159	olfactory receptor family 8 subfamily D member 1	2.64328	0.0339955		4.60068	15.6886	31.5253	0	5.55845	2.78218	0.04243	0.166178	0.348514	0	0.052108	0.021476
ENSG00000196415	PRTN3	5657	proteinase 3	-1.44534	1.26366e-05	0.000831817	46.0068	50.7572	47.8315	113.305	130.068	150.238	0.524715	0.564626	0.539388	1.30326	1.509	1.71867
ENSG00000197405	C5AR1	728	complement C5a receptor 1	1.05627	0.0140213	0.117749	165.625	636.773	180.455	159.239	157.86	155.802	3.3723	4.71511	3.29826	3.24653	2.98952	2.82425
ENSG00000197408	CYP2B6	1555	cytochrome P450 family 2 subfamily B member 6	-5.09722	0.0482784		0	0	0	5.10382	13.3403	0	0	0	0	0.015968	0.052517	0
ENSG00000197635	DPP4	1803	dipeptidyl peptidase 4	-5.77703	0.00241636		0	0	0	9.18688	4.44676	15.7657	0	0	0	0.026204	0.013694	0.123007
ENSG00000197915	HRNR	388697	hornerin	5.93628	0.000863934		11.9618	8.30573	14.132	0	0	0	0.013571	0.008859	0.015925	0	0	0
ENSG00000197993	KEL	3792	Kell metallo-endopeptidase (Kell blood group)	-2.85284	0.0367993		1.84027	4.6143	0	7.14535	36.6858	3.70958	0.062012	0.015158	0	0.029852	0.239545	0.087963
ENSG00000198417	MT1F	4494	metallothionein 1F	-1.2733	0.00791376		34.0451	19.38	40.222	77.5781	95.6054	52.8615	0.559975	0.295071	0.64661	1.32519	1.62659	0.884101
ENSG00000198535	C2CD4A	145741	C2 calcium dependent domain containing 4A	-1.39468	0.0412602		16.5625	7.38287	11.9579	42.8721	25.5689	25.967	0.056832	0.024746	0.03707	0.147828	0.087993	0.087423
ENSG00000198625	MDM4	4194	MDM4 regulator of p53	-1.12947	0.00968643	0.0939224	1276.23	999.456	1049.03	2860.18	3232.8	1181.5	3.20192	3.33274	4.84237	5.14255	6.12348	8.27944
ENSG00000198719	DLL1	28514	delta like canonical Notch ligand 1	-1.01073	0.0178034		59.8089	26.7629	44.5703	76.5573	91.1586	96.449	0.221319	0.094005	0.162649	0.285246	0.344529	0.379085
ENSG00000198857	NA	NA	NA	-5.26893	0.032771		0	0	0	13.2699	0	7.41915	0	0	0	0.134745	0	0.077861
ENSG00000198865	CCDC152	100129792	coiled-coil domain containing 152	2.4953	0.000219253		169.305	62.7544	32.6124	23.4776	6.67014	16.6931	0.580538	0.209869	0.108764	0.080485	0.021741	0.055509
ENSG00000199683	NA	NA	NA	-5.38344	0.00770512		0	0	0	6.12459	8.89353	7.41915	0	0	0	0.22438	0.317058	0.250086
ENSG00000203325	NA	NA	NA	-3.44811	0.0300005		1.84027	0	1.08708	11.2284	18.8987	1.85479	0.031566	0	0.01876	0.197149	0.356102	0.027163
ENSG00000204194	NA	NA	NA	-1.04025	0.020764		46.0068	26.7629	46.7444	88.8065	102.276	54.7162	1.07197	0.603206	1.08167	2.11916	2.46131	1.29406
ENSG00000204475	NCR3	259197	natural cytotoxicity triggering receptor 3	-5.23738	0.0347317		0	0	0	8.16611	0	12.0561	0	0	0	0.088907	0	0.120993
ENSG00000204519	ZNF551	90233	zinc finger protein 551	1.15921	0.0128607	0.112141	86.4929	212.258	343.517	69.412	147.855	70.4819	0.466256	1.18254	0.881813	0.391174	0.949766	0.515491
ENSG00000204539	CDSN	1041	corneodesmosin	-1.57786	0.000828568		34.9652	23.0715	54.354	114.326	154.525	65.845	0.161394	0.102305	0.245581	0.534575	0.726397	0.306339
ENSG00000204792	LINC01291	102724515	long intergenic non-protein coding RNA 1291	-3.14332	3.82017e-35	2.81642e-31	58.8888	37.8372	55.4411	389.932	468.022	484.1	1.23069	0.767533	1.14864	2.17784	2.84559	1.92194
ENSG00000204930	FAM221B	392307	family with sequence similarity 221 member B	-3.16491	0.0465754		0	3.69144	0	9.18688	20.0104	4.63697	0	0.01	0	0.028841	0.122072	0.011711
ENSG00000204934	ATP6V0E2-AS1	401431	ATP6V0E2 antisense RNA 1	1.00584	0.0273413		75.4512	63.6773	98.9243	23.4776	53.3612	41.7327	0.299763	0.246414	0.385187	0.09107	0.215792	0.165955
ENSG00000205090	TMEM240	339453	transmembrane protein 240	-2.18516	3.30905e-06	0.000282035	94.7741	20.3029	32.6124	205.174	267.917	200.317	1.42601	0.322424	0.520741	3.12114	4.11314	3.0641
ENSG00000205334	LINC01460	100129995	long intergenic non-protein coding RNA 1460	-1.16203	0.0123976		40.486	36.9144	19.5674	88.8065	62.2547	66.7724	0.167383	0.149037	0.080136	0.370222	0.26024	0.277154
ENSG00000205464	ATP6AP1L	92270	ATPase H+ transporting accessory protein 1 like	-1.34358	0.0015989		28.5242	45.2201	57.6152	74.5158	141.185	116.852	0.132952	0.208231	0.235422	0.488309	0.922755	0.807911
ENSG00000205634	LINC00898	400932	long intergenic non-protein coding RNA 898	1.49997	0.0437826		26.684	39.6829	19.5674	16.3322	6.67014	7.41915	0.074869	0.108896	0.05225	0.044636	0.05594	0.021061
ENSG00000205959	NA	NA	NA	-1.97674	0.00152401		8.28123	11.9972	13.045	58.1836	28.904	43.5875	0.163464	0.22781	0.26142	0.22941	0.418894	0.515748
ENSG00000206172	HBA1	3039	hemoglobin subunit alpha 1	2.03292	2.67197e-05		57.0485	83.0573	68.486	17.353	18.8987	14.8383	1.12688	1.66189	1.39057	0.316997	0.391782	0.300719
ENSG00000206337	HCP5	10866	HLA complex P5	3.07613	0.00203066	0.0339864	3010.69	195.646	3350.38	281.731	243.46	252.251	15.4206	1.51757	17.1322	2.12706	1.72295	1.83414
ENSG00000206651	NA	NA	NA	4.16254	0.0345453		4.60068	7.38287	7.60956	0	1.11169	0	0.461009	0.730529	0.706713	0	0.047312	0
ENSG00000207721	MIR186	406962	microRNA 186	1.52542	0.00741676		55.2082	47.9887	32.6124	16.3322	12.2286	18.5479	7.4731	6.33257	4.32219	2.16041	1.6391	2.49384
ENSG00000211644	NA	NA	NA	5.25488	0.0215339		1.84027	18.4572	1.08708	0	0	0	0.042496	0.515183	0.029183	0	0	0
ENSG00000212643	NA	NA	NA	-1.25523	0.0322809		13.8021	18.4572	13.045	38.789	33.3507	36.1684	0.095529	0.125555	0.090503	0.273144	0.231704	0.251514
ENSG00000213204	NA	NA	NA	-1.74247	0.00705419		41.4062	14.7657	11.9579	80.6404	30.0157	117.779	0.250036	0.084948	0.074179	0.512739	0.184167	0.752665
ENSG00000213304	NA	NA	NA	-2.22747	0.00618798		6.44096	2.76858	10.8708	48.9967	20.0104	24.1122	0.129805	0.040136	0.2405	1.08153	0.428908	0.529495
ENSG00000213413	PVRIG	79037	PVR related immunoglobulin domain containing	-9.15777	0.0191013		0	0	0	123.512	183.429	0	0	0	0	3.01776	3.52109	0
ENSG00000213625	LEPROT	54741	leptin receptor overlapping transcript	-1.67643	0.0106658	0.0992725	617.412	519.57	582.675	908.48	967.171	3620.55	5.24108	5.47877	5.94397	7.36416	5.35081	11.8208
ENSG00000214076	NA	NA	NA	-2.99594	0.0053911		4.60068	4.6143	0	25.5191	41.1326	8.34655	0.011671	0.011428	0	0.078574	0.13196	0.02363
ENSG00000214190	NA	NA	NA	4.9427	0.0250271		7.3611	5.53715	4.34832	0	0	0	0.143667	0.094329	0.081754	0	0	0
ENSG00000214237	MINDY4B	646951	MINDY family member 4B	-4.73987	0.0445213		0	0	0	3.06229	6.67014	4.63697	0	0	0	0.031419	0.092778	0.063865
ENSG00000214417	NA	NA	NA	5.66726	0.00291926		8.28123	14.7657	5.4354	0	0	0	0.073607	0.1249	0.04789	0	0	0
ENSG00000214773	NA	NA	NA	2.37042	0.0462325		11.0416	14.7657	16.3062	0	4.44676	3.70958	0.091455	0.119397	0.127782	0	0.035999	0.030861
ENSG00000214875	NA	NA	NA	2.11113	0.0284047		7.3611	19.38	42.3961	3.06229	4.44676	8.34655	0.144346	0.388673	0.854949	0.053804	0.09363	0.165678
ENSG00000214978	GSG1L2	644070	GSG1 like 2	5.22332	0.0121025		6.44096	10.1514	4.34832	0	0	0	0.079169	0.123798	0.054349	0	0	0
ENSG00000215085	NA	NA	NA	5.13597	0.0154786		3.68055	7.38287	8.69664	0	0	0	0.06802	0.133202	0.159632	0	0	0
ENSG00000215186	GOLGA6B	55889	golgin A6 family member B	2.91831	0.0303764		11.9618	18.4572	7.60956	4.08306	0	0.927394	0.065265	0.09987	0.040207	0.022852	0	0.00402
ENSG00000215246	LOC100506688	100506688	uncharacterized LOC100506688	-1.11059	2.47759e-09	6.19188e-07	328.489	244.558	250.028	564.483	580.303	633.41	1.11449	0.809095	0.843301	1.93291	2.00196	2.15908
ENSG00000215533	LINC00189	193629	long intergenic non-protein coding RNA 189	-4.27797	0.0285925		0.920137	0	0	5.10382	7.78184	7.41915	0.006596	0	0	0.06228	0.102856	0.084985
ENSG00000215845	TSTD1	100131187	thiosulfate sulfurtransferase like domain containing 1	3.36924	0.0337291		12.8819	11.0743	7.60956	3.06229	0	0	0.183837	0.14863	0.108816	0.05815	0	0
ENSG00000217455	NA	NA	NA	-5.57301	0.0184112		0	0	0	5.10382	0	20.4027	0	0	0	0.112586	0	0.236393
ENSG00000217576	NA	NA	NA	7.93353	0.0423836		0	35.0686	102.186	0	0	0	0	0.104773	0.315398	0	0	0
ENSG00000217889	NA	NA	NA	-5.23508	0.0165172		0	0	0	5.10382	13.3403	1.85479	0	0	0	0.062388	0.188248	0.016379
ENSG00000218902	NA	NA	NA	5.11417	0.043222		6.44096	0	13.045	0	0	0	0.211947	0	0.447872	0	0	0
ENSG00000219392	NA	NA	NA	1.57221	0.0477518		11.9618	26.7629	36.9607	6.12459	10.0052	9.27394	0.14134	0.332755	0.468438	0.074766	0.11572	0.110491
ENSG00000219435	CATSPERZ	25858	catsper channel auxiliary subunit zeta	-6.7843	6.93036e-05		0	0	0	26.5399	30.0157	2.78218	0	0	0	0.389235	0.380497	0.058728
ENSG00000219665	ZNF433-AS1	101928464	ZNF433 and ZNF878 antisense RNA 1	5.47349	0.0192644		11.0416	13.8429	0	0	0	0	0.032649	0.044623	0	0	0	0
ENSG00000219902	NA	NA	NA	2.23344	0.0150126		17.4826	12.92	27.177	4.08306	4.44676	3.70958	0.544451	0.389482	0.850452	0.122242	0.117685	0.098196
ENSG00000220517	NA	NA	NA	-2.88722	0.0463194		1.84027	2.76858	0	20.4153	2.22338	12.0561	0.017596	0.022053	0	0.188832	0.02161	0.111705
ENSG00000220583	NA	NA	NA	-2.28207	0.045818		5.52082	3.69144	0	17.353	13.3403	14.8383	0.154644	0.115858	0	0.562883	0.440857	0.459713
ENSG00000220702	NA	NA	NA	5.84922	0.00142822		16.5625	9.22859	6.52248	0	0	0	0.317276	0.173031	0.126441	0	0	0
ENSG00000221986	MYBPHL	343263	myosin binding protein H like	1.86151	0.0168266		26.684	15.6886	34.7866	8.16611	5.55845	7.41915	0.263903	0.145741	0.435607	0.080885	0.075148	0.09136
ENSG00000223390	NA	NA	NA	5.82961	0.00150332		6.44096	15.6886	9.78372	0	0	0	0.088217	0.230831	0.150488	0	0	0
ENSG00000223576	NA	NA	NA	-4.0212	0.0421476		0	0	2.17416	0	18.8987	14.8383	0	0	0.04308	0	0.507733	0.380791
ENSG00000223935	NA	NA	NA	3.53462	0.0477153		9.20137	4.6143	10.8708	0	2.22338	0	0.14471	0.058955	0.175629	0	0.022696	0
ENSG00000224424	PRKAR2A-AS1	100506637	PRKAR2A antisense RNA 1	-1.34314	0.00609543	0.0694669	23.9236	125.509	52.1798	141.886	173.424	196.608	0.323093	0.503897	0.669471	0.610471	1.01246	1.17824
ENSG00000224745	NA	NA	NA	-3.69077	0.0447163		0	1.84572	0	7.14535	3.33507	13.9109	0	0.038892	0	0.149576	0.080129	0.328074
ENSG00000225076	NA	NA	NA	-5.23639	0.0377574		0	0	0	0	4.44676	15.7657	0	0	0	0	0.0789	0.32259
ENSG00000225298	LINC00113	54088	long intergenic non-protein coding RNA 113	-4.92454	0.0294283		0	0	0	8.16611	4.44676	3.70958	0	0	0	0.159021	0.082156	0.073479
ENSG00000225493	LINC01107	151171	long intergenic non-protein coding RNA 1107	-5.62545	0.00546146		0	0	0	3.06229	18.8987	4.63697	0	0	0	0.017823	0.108278	0.022314
ENSG00000225603	NA	NA	NA	5.15864	0.016028		3.68055	11.9972	4.34832	0	0	0	0.026146	0.076801	0.03068	0	0	0
ENSG00000225768	LINC02620	101927523	long intergenic non-protein coding RNA 2620	5.22662	0.0374934		0	3.69144	17.3933	0	0	0	0	0.041937	0.201707	0	0	0
ENSG00000226091	LINC00937	389634	long intergenic non-protein coding RNA 937	-5.43219	0.00738679		0	0	0	12.2492	4.44676	6.49176	0	0	0	0.047645	0.017509	0.055427
ENSG00000226145	NA	NA	NA	-3.43269	0.0099155		0	4.6143	0	17.353	17.7871	15.7657	0	0.022757	0	0.109525	0.151843	0.107257
ENSG00000226205	NA	NA	NA	5.38501	0.024683		0	14.7657	8.69664	0	0	0	0	0.205916	0.130645	0	0	0
ENSG00000226403	NA	NA	NA	-4.43195	0.00607875		0	0.922859	1.08708	16.3322	24.4572	1.85479	0	0.017147	0.023752	0.510242	0.652157	0.033479
ENSG00000226674	TEX41	401014	testis expressed 41	5.06814	0.0463848		0	10.1514	8.69664	0	0	0	0	0.039498	0.088891	0	0	0
ENSG00000226971	NA	NA	NA	-5.24375	0.0340712		0	0	0	9.18688	0	11.1287	0	0	0	0.073331	0	0.099077
ENSG00000227176	NA	NA	NA	3.69098	0.0359267		3.68055	12.92	10.8708	0	2.22338	0	0.054322	0.192862	0.150474	0	0.027701	0
ENSG00000227666	NA	NA	NA	1.864	0.0355386		25.7638	15.6886	22.8287	8.16611	7.78184	1.85479	0.931337	0.547275	0.845793	0.308641	0.26334	0.058108
ENSG00000228028	NA	NA	NA	5.82149	0.00151612		15.6423	7.38287	8.69664	0	0	0	0.564653	0.185461	0.219048	0	0	0
ENSG00000228144	NA	NA	NA	2.96079	0.042949		7.3611	87.6716	0	0	6.67014	5.56436	0.082719	1.02819	0	0	0.071569	0.064995
ENSG00000228196	NA	NA	NA	-5.51804	0.00581584		0	0	0	5.10382	5.55845	13.9109	0	0	0	0.04549	0.049872	0.147446
ENSG00000228315	GUSBP11	91316	GUSB pseudogene 11	-1.26709	1.16831e-09	3.19014e-07	462.829	504.804	632.68	1681.2	980.511	1187.06	1.77569	2.05136	2.7211	6.41803	4.29694	4.48903
ENSG00000228366	NA	NA	NA	-5.16514	0.0179815		0	0	0	2.04153	8.89353	8.34655	0	0	0	0.027753	0.205012	0.198849
ENSG00000228412	LOC100506885	100506885	uncharacterized LOC100506885	5.34442	0.00871479		11.9618	6.46001	4.34832	0	0	0	0.067818	0.10576	0.026467	0	0	0
ENSG00000228446	NA	NA	NA	3.3026	0.012803		18.4027	19.38	15.2191	0	5.55845	0	0.30485	0.308442	0.240387	0	0.080119	0
ENSG00000228463	NA	NA	NA	-1.96717	6.89761e-05		13.8021	18.4572	16.3062	68.3912	67.8131	53.7888	0.103943	0.146227	0.1277	0.359338	0.355476	0.2884
ENSG00000228484	LOC101927692	101927692	uncharacterized LOC101927692	4.84987	0.0345229		3.68055	2.76858	9.78372	0	0	0	0.018306	0.01195	0.042962	0	0	0
ENSG00000228995	NA	NA	NA	3.38531	0.0150832		7.3611	15.6886	27.177	0	0	4.63697	0.091769	0.183473	0.324675	0	0	0.046684
ENSG00000229191	NA	NA	NA	-1.66708	0.00572618		20.243	24.9172	10.8708	53.0797	94.4937	31.5314	0.068362	0.081474	0.035993	0.180357	0.419165	0.107148
ENSG00000229207	NA	NA	NA	-1.13159	0.007235		36.8055	38.7601	40.222	62.2666	115.616	76.0463	0.342034	0.351281	0.368904	0.587474	1.10449	0.714965
ENSG00000229334	NA	NA	NA	1.4471	0.0363897		35.8853	42.4515	22.8287	7.14535	20.0104	10.2013	0.428907	0.501527	0.275031	0.080007	0.239307	0.119358
ENSG00000229820	NA	NA	NA	4.31453	0.030331		3.68055	14.7657	3.26124	0	1.11169	0	0.098335	0.424804	0.06569	0	0.017188	0
ENSG00000229931	NA	NA	NA	-1.03524	0.047306		31.2847	25.8401	18.4804	68.3912	50.0261	37.0958	0.572101	0.523333	0.325442	1.36188	1.06136	0.691923
ENSG00000230131	NA	NA	NA	-5.48828	0.00611144		0	0	0	4.08306	8.89353	11.1287	0	0	0	0.054524	0.115803	0.159095
ENSG00000230183	NA	NA	NA	5.11202	0.0453457		3.68055	15.6886	0	0	0	0	0.029776	0.122743	0	0	0	0
ENSG00000230287	NA	NA	NA	4.69053	0.0453446		3.68055	6.46001	4.34832	0	0	0	0.170601	0.334085	0.200187	0	0	0
ENSG00000230433	NA	NA	NA	3.75786	0.0426453		0	17.5343	23.9158	3.06229	0	0	0	0.227911	0.32014	0.030899	0	0
ENSG00000230570	NA	NA	NA	-5.70343	0.00419477		0	0	0	5.10382	3.33507	19.4753	0	0	0	0.040536	0.032738	0.183164
ENSG00000230833	NA	NA	NA	5.68254	0.00254595		7.3611	7.38287	14.132	0	0	0	0.11935	0.117071	0.226696	0	0	0
ENSG00000230896	NA	NA	NA	1.07255	0.0186064		84.6526	60.9087	56.5282	23.4776	35.5741	37.0958	1.66898	1.16938	1.10255	0.466187	0.710174	0.722338
ENSG00000230958	NA	NA	NA	4.7054	0.0430401		4.60068	4.6143	5.4354	0	0	0	0.164957	0.15223	0.199914	0	0	0
ENSG00000231336	NA	NA	NA	-4.85344	0.0395809		0	0	0	3.06229	2.22338	10.2013	0	0	0	0.096345	0.040146	0.32191
ENSG00000231531	NA	NA	NA	5.04333	0.0250908		1.84027	3.69144	13.045	0	0	0	0.031095	0.11126	0.405414	0	0	0
ENSG00000231691	NA	NA	NA	3.34549	0.0128829		16.5625	13.8429	18.4804	0	0	4.63697	0.43101	0.33947	0.477403	0	0	0.106492
ENSG00000231924	PSG1	5669	pregnancy specific beta-1-glycoprotein 1	-5.34131	0.031287		0	0	0	17.353	4.44676	0	0	0	0	0.085703	0.02349	0
ENSG00000232043	NA	NA	NA	-1.09163	0.00818022		26.684	39.6829	44.5703	76.5573	76.7067	82.5381	0.067244	0.097797	0.112885	0.19803	0.200832	0.213519
ENSG00000232656	IDI2-AS1	55853	IDI2 antisense RNA 1	-2.02286	0.0108184		14.7222	5.53715	3.26124	45.9344	24.4572	25.967	0.278638	0.088106	0.031747	0.600395	0.248526	0.292203
ENSG00000232682	NA	NA	NA	-5.79957	0.00245542		0	0	0	17.353	8.89353	3.70958	0	0	0	0.155944	0.063945	0.024938
ENSG00000232709	NA	NA	NA	2.43771	0.0389553		15.6423	7.38287	25.0028	4.08306	0	4.63697	0.100912	0.049363	0.167003	0.023339	0	0.025518
ENSG00000232716	NA	NA	NA	-5.31625	0.00971608		0	0	0	5.10382	8.89353	7.41915	0	0	0	0.028303	0.05624	0.046413
ENSG00000232827	NA	NA	NA	3.42568	0.0340464		14.7222	5.53715	10.8708	0	0	2.78218	0.051355	0.016078	0.037008	0	0	0.009021
ENSG00000232946	NA	NA	NA	1.34012	0.0440769		31.2847	25.8401	33.6995	8.16611	16.6754	11.1287	1.09423	0.870522	1.19552	0.266171	0.595463	0.374567
ENSG00000233144	NA	NA	NA	-5.29911	0.0101003		0	0	0	8.16611	5.55845	7.41915	0	0	0	0.23722	0.149841	0.193546
ENSG00000233186	NA	NA	NA	-5.20396	0.00170848		0.920137	0	0	14.2907	12.2286	12.0561	0.008939	0	0	0.138683	0.116399	0.111568
ENSG00000233196	NA	NA	NA	5.08889	0.0189029		11.0416	3.69144	4.34832	0	0	0	0.192692	0.062961	0.075454	0	0	0
ENSG00000233264	NA	NA	NA	-1.13423	0.0100995		27.6041	62.7544	32.6124	85.7442	102.276	82.5381	0.219455	0.490803	0.25927	0.696308	0.836509	0.667261
ENSG00000233360	LOC101927051	101927051	uncharacterized LOC101927051	-1.43766	0.0400092		6.44096	9.22859	17.3933	30.6229	26.6806	31.5314	0.037986	0.054066	0.102576	0.185075	0.159516	0.191469
ENSG00000233388	NA	NA	NA	-2.15289	0.0322311		0	7.38287	9.78372	16.3322	27.7923	31.5314	0	0.043547	0.059192	0.111036	0.185849	0.213197
ENSG00000233431	NA	NA	NA	-3.53161	0.0264525		0	2.76858	0	6.12459	15.5637	11.1287	0	0.032918	0	0.089096	0.222265	0.153876
ENSG00000233469	NA	NA	NA	-2.71984	0.010962		1.84027	2.76858	3.26124	27.5606	16.6754	7.41915	0.03635	0.063211	0.053232	0.65509	0.376773	0.176336
ENSG00000233872	NA	NA	NA	4.87657	0.0298101		7.3611	3.69144	5.4354	0	0	0	0.107091	0.047236	0.062832	0	0	0
ENSG00000234019	NA	NA	NA	-2.86999	0.0259376		9.20137	0	0	11.2284	24.4572	32.4588	0.176962	0	0	0.209465	0.475135	0.619396
ENSG00000234141	NA	NA	NA	4.83605	0.0339145		3.68055	3.69144	8.69664	0	0	0	0.062908	0.061596	0.147636	0	0	0
ENSG00000234197	NA	NA	NA	5.37404	0.00696345		7.3611	8.30573	7.60956	0	0	0	0.148349	0.16486	0.146528	0	0	0
ENSG00000234219	NA	NA	NA	-1.38867	0.0119171		14.7222	17.5343	33.6995	47.9759	45.5793	77.9011	0.253514	0.294194	0.56541	0.840245	0.793813	1.34649
ENSG00000234782	NA	NA	NA	3.00417	0.0449527		2.76041	20.3029	8.69664	2.04153	0	1.85479	0.042347	0.455271	0.193794	0.046805	0	0.040011
ENSG00000234912	SNHG20	654434	small nucleolar RNA host gene 20	-1.74865	0.0107961	0.0999399	184.027	146.735	114.143	673.704	684.802	137.254	1.3728	1.1175	0.909907	4.10838	4.23272	1.18724
ENSG00000234942	GRID1-AS1	100507470	GRID1 antisense RNA 1	-1.5575	0.0402181		11.0416	14.7657	4.34832	17.353	31.1273	40.8053	0.062189	0.080919	0.024325	0.095623	0.178208	0.226124
ENSG00000235060	NA	NA	NA	-5.20404	0.0381352		0	0	0	0	13.3403	6.49176	0	0	0	0	0.191867	0.092151
ENSG00000235072	NA	NA	NA	-2.35427	0.0189976		0	10.1514	5.4354	24.4983	36.6858	18.5479	0	0.072689	0.032914	0.185383	0.318179	0.141881
ENSG00000235415	LOC105372672	105372672	uncharacterized LOC105372672	4.7209	0.0433041		2.76041	5.53715	6.52248	0	0	0	0.057331	0.154667	0.172628	0	0	0
ENSG00000235523	NA	NA	NA	-1.00798	0.00522824		51.5277	50.7572	48.9186	117.388	78.93	107.578	1.67096	1.62273	1.58718	3.8652	2.61191	3.53938
ENSG00000235852	NA	NA	NA	-2.35973	0.00171285		47.8471	6.46001	3.26124	82.6819	142.296	72.3367	0.607376	0.081109	0.038687	1.06667	1.86	0.927184
ENSG00000236393	LOC101927476	101927476	uncharacterized LOC101927476	-1.56902	0.000956669		23.9236	23.9943	17.3933	55.1213	61.143	77.9011	0.115332	0.254265	0.068053	0.217904	0.834074	0.489862
ENSG00000236542	NA	NA	NA	-6.20968	0.00027872		0	0	0	15.3115	13.3403	11.1287	0	0	0	0.329702	0.302618	0.24446
ENSG00000236576	NA	NA	NA	-3.16182	0.0226315		0	0.922859	3.26124	7.14535	13.3403	15.7657	0	0.003749	0.02324	0.069369	0.13994	0.160398
ENSG00000236983	NA	NA	NA	-3.72863	0.0142287		0	2.76858	0	18.3738	10.0052	9.27394	0	0.040612	0	0.326847	0.178201	0.164918
ENSG00000237115	NA	NA	NA	-3.47518	0.0091877		4.60068	0	0	12.2492	17.7871	22.2575	0.017893	0	0	0.060063	0.085918	0.108196
ENSG00000237336	NA	NA	NA	-5.32034	0.028943		0	0	0	11.2284	0	10.2013	0	0	0	0.17378	0	0.158878
ENSG00000237424	FOXD2-AS1	84793	FOXD2 adjacent opposite strand RNA 1	-1.03806	9.84221e-11	3.62808e-08	382.777	482.655	498.97	1014.64	896.023	889.371	1.80383	2.22083	2.33463	4.82677	4.29078	4.20898
ENSG00000237719	NA	NA	NA	1.04787	0.00274157	0.0412786	107.656	156.886	105.447	69.412	51.1378	58.4258	1.93441	2.76042	1.88418	1.26349	0.923369	1.05605
ENSG00000237819	LOC101927497	101927497	uncharacterized LOC101927497	1.26508	0.00516333		71.7707	59.9858	55.4411	26.5399	24.4572	26.8944	1.99562	1.62669	1.5316	0.685596	0.656593	0.706614
ENSG00000237852	NA	NA	NA	5.16172	0.0439137		0	2.76858	17.3933	0	0	0	0	0.050384	0.482242	0	0	0
ENSG00000237899	NA	NA	NA	4.80753	0.0359235		6.44096	2.76858	6.52248	0	0	0	0.153603	0.059922	0.153411	0	0	0
ENSG00000238048	NA	NA	NA	5.111	0.0417231		9.20137	10.1514	0	0	0	0	0.131982	0.136096	0	0	0	0
ENSG00000238120	LINC01589	100506737	long intergenic non-protein coding RNA 1589	-1.42994	0.0403209		9.20137	11.0743	15.2191	16.3322	40.0209	38.9505	0.198598	0.232919	0.306256	0.347243	0.862749	0.83099
ENSG00000239627	NA	NA	NA	2.03588	0.00615098		34.0451	35.9915	20.6545	10.2076	4.44676	7.41915	0.824909	0.860502	0.490204	0.254516	0.09115	0.173885
ENSG00000239704	CDRT4	284040	CMT1A duplicated region transcript 4	1.20471	0.00465874	0.0580358	328.489	444.818	102.186	124.533	156.748	99.2312	3.07438	3.56046	1.81827	1.47487	2.28905	1.77378
ENSG00000239884	NA	NA	NA	-2.6188	0.0372641		2.76041	2.76858	4.34832	3.06229	3.33507	53.7888	0.086355	0.099657	0.159238	0.097929	0.099228	2.29033
ENSG00000240050	NA	NA	NA	-1.91261	0.00584195		9.20137	7.38287	9.78372	46.9552	23.3455	28.7492	0.067545	0.048578	0.068787	0.344418	0.171683	0.213605
ENSG00000240093	NA	NA	NA	-5.08691	0.0199293		0	0	0	3.06229	7.78184	7.41915	0	0	0	0.058748	0.161648	0.149383
ENSG00000240163	NA	NA	NA	2.30279	0.0364352		40.486	11.0743	22.8287	12.2492	0	2.78218	1.52411	0.401656	0.857373	0.436595	0	0.071095
ENSG00000240250	NA	NA	NA	-2.14965	0.0350468		4.60068	1.84572	4.34832	18.3738	21.1221	8.34655	0.160491	0.040667	0.150419	0.77025	0.884115	0.313001
ENSG00000240457	NA	NA	NA	4.73607	0.0446168		1.84027	5.53715	7.60956	0	0	0	0.067354	0.200758	0.273136	0	0	0
ENSG00000240494	NA	NA	NA	-5.78376	0.0315713		0	0	0	29.6022	0	0	0	0	0	0.799431	0	0
ENSG00000240707	LINC01168	399829	long intergenic non-protein coding RNA 1168	-6.06806	0.000876184		0	0	0	21.4361	10.0052	4.63697	0	0	0	0.046408	0.020351	0.008569
ENSG00000240731	NA	NA	NA	-2.90398	1.38275e-10	4.74153e-08	22.0833	11.9972	32.6124	101.056	193.434	201.244	0.64881	0.345072	0.975767	3.0993	6.02033	6.1669
ENSG00000240828	NA	NA	NA	-5.90898	0.00109105		0	0	0	12.2492	8.89353	11.1287	0	0	0	0.302365	0.196066	0.274781
ENSG00000241158	ADAMTS9-AS1	101929335	ADAMTS9 antisense RNA 1	5.56194	0.00432541		9.20137	12.92	4.34832	0	0	0	0.120876	0.171956	0.060335	0	0	0
ENSG00000241484	ARHGAP8	23779	Rho GTPase activating protein 8	-1.32926	0.0129782		32.2048	58.1401	19.5674	58.1836	147.855	71.4093	0.197648	0.398203	0.189922	0.393073	1.24154	0.642803
ENSG00000241511	NA	NA	NA	-5.11936	0.019745		0	0	0	3.06229	4.44676	11.1287	0	0	0	0.064035	0.131406	0.316794
ENSG00000241962	NA	NA	NA	1.17048	0.000937075	0.0197671	254.878	616.47	289.163	117.388	168.977	229.066	1.54321	3.65582	1.74394	0.717665	1.07369	1.39211
ENSG00000242759	LINC00882	100302640	long intergenic non-protein coding RNA 882	-1.62816	0.0369829		12.8819	3.69144	23.9158	19.3945	68.9248	36.1684	0.138049	0.083979	0.362804	0.238477	1.01981	0.593545
ENSG00000242767	ZBTB20-AS4	100874131	ZBTB20 antisense RNA 4	5.11374	0.0206778		1.84027	4.6143	13.045	0	0	0	0.019012	0.063569	0.22451	0	0	0
ENSG00000242852	ZNF709	163051	zinc finger protein 709	-1.01044	0.0233142		82.8123	51.6801	27.177	119.429	122.286	85.3202	0.32984	0.249134	0.252673	0.418649	0.406246	0.335669
ENSG00000243251	NA	NA	NA	1.62255	0.00259638		76.3714	103.36	39.1349	16.3322	22.2338	32.4588	0.408141	0.535954	0.206128	0.086837	0.120267	0.170651
ENSG00000243498	NA	NA	NA	-4.25437	0.0414238		0	0	1.08708	13.2699	1.11169	5.56436	0	0	0.055682	0.706442	0.024493	0.273606
ENSG00000244378	NA	NA	NA	2.27019	0.0152543		33.1249	23.0715	31.5253	0	8.89353	9.27394	0.190327	0.132855	0.243379	0	0.046436	0.099122
ENSG00000244515	NA	NA	NA	1.6615	0.0316208		18.4027	18.4572	57.6152	8.16611	13.3403	8.34655	0.171388	0.167814	0.528677	0.076028	0.126289	0.0694
ENSG00000244604	NA	NA	NA	-5.5457	0.0472578		0	0	0	0	0	25.0396	0	0	0	0	0	0.842439
ENSG00000244617	ASPRV1	151516	aspartic peptidase retroviral like 1	1.72872	0.0343088		34.0451	59.063	59.7894	1.02076	13.3403	31.5314	0.183702	0.310009	0.317553	0.002892	0.070563	0.169435
ENSG00000244649	NA	NA	NA	1.4131	2.05794e-05	0.00119938	155.503	141.197	172.846	59.2043	42.2443	74.1915	1.2186	1.02823	1.49802	0.711503	0.371107	0.483463
ENSG00000247675	LRP4-AS1	100507401	LRP4 antisense RNA 1	-1.37282	0.022625		34.9652	11.9972	14.132	54.1005	36.6858	67.6998	0.271529	0.15834	0.21548	0.454136	0.286023	0.539037
ENSG00000247950	SEC24B-AS1	100533182	SEC24B antisense RNA 1	1.8501	0.0189866		64.4096	11.9972	47.8315	8.16611	20.0104	6.49176	0.78756	0.141603	0.586618	0.155036	0.280192	0.115296
ENSG00000248840	NA	NA	NA	-3.56678	0.0273698		0	0	3.26124	15.3115	18.8987	2.78218	0	0	0.078831	0.613787	0.737548	0.081502
ENSG00000249240	NA	NA	NA	-5.59812	0.0432737		0	0	0	0	0	25.967	0	0	0	0	0	0.261044
ENSG00000249249	NA	NA	NA	-1.49879	0.0167229		21.1632	16.6115	13.045	80.6404	35.5741	27.8218	0.320173	0.293302	0.185129	1.65503	0.704794	0.515545
ENSG00000249348	UGDH-AS1	100885776	UGDH antisense RNA 1	-1.04	0.0173556		44.1666	54.4487	47.8315	138.824	108.946	53.7888	0.186304	0.224557	0.201183	0.594318	0.467637	0.229048
ENSG00000249464	LINC01091	285419	long intergenic non-protein coding RNA 1091	4.7054	0.0430401		4.60068	4.6143	5.4354	0	0	0	0.008273	0.008101	0.009708	0	0	0
ENSG00000249790	NA	NA	NA	1.77742	0.00515914		58.8888	52.603	35.8736	22.4568	5.55845	14.8383	0.573691	0.551532	0.302274	0.184103	0.027111	0.08939
ENSG00000250021	ARPIN-AP3S2	100526783	ARPIN-AP3S2 readthrough	2.63475	0.00828616	0.0857237	2526.7	367.298	365.259	298.063	103.387	123.343	13.5046	4.14889	3.99302	3.55691	0.525884	0.832259
ENSG00000250523	NA	NA	NA	5.13657	0.0218671		2.76041	1.84572	15.2191	0	0	0	0.077455	0.044345	0.49515	0	0	0
ENSG00000250582	SMAD1-AS2	101927659	SMAD1 antisense RNA 2	-5.29389	0.012487		0	0	0	4.08306	13.3403	3.70958	0	0	0	0.044739	0.147144	0.04043
ENSG00000250629	NA	NA	NA	-2.35825	0.0073614		15.6423	8.30573	0	51.0382	26.6806	46.3697	0.308196	0.152393	0	1.0573	0.559542	0.963805
ENSG00000251216	NA	NA	NA	5.13733	0.0406872		0	11.0743	8.69664	0	0	0	0	0.069873	0.056011	0	0	0
ENSG00000251411	NA	NA	NA	2.38055	0.0134373		14.7222	20.3029	17.3933	4.08306	2.22338	3.70958	0.150096	0.2068	0.174574	0.043933	0.020612	0.039702
ENSG00000252408	NA	NA	NA	2.33531	0.00606913		22.0833	23.9943	20.6545	3.06229	5.55845	4.63697	3.56013	3.69608	3.1559	0.369636	0.854423	0.708328
ENSG00000253180	NA	NA	NA	-1.95604	0.00853368		7.3611	4.6143	15.2191	48.9967	21.1221	34.3136	0.18771	0.113731	0.391318	1.33508	0.579177	0.920806
ENSG00000253227	NA	NA	NA	2.46872	0.0241272		10.1215	21.2258	29.3512	7.14535	0	3.70958	0.203323	0.426504	0.62167	0.148308	0	0.071695
ENSG00000253295	NA	NA	NA	-3.4187	0.0152039		0	0	4.34832	13.2699	14.452	16.6931	0	0	0.108225	0.315493	0.339804	0.403171
ENSG00000253302	STAU2-AS1	100128126	STAU2 antisense RNA 1	3.37693	0.0182794		8.28123	15.6886	20.6545	0	4.44676	0	0.092999	0.14024	0.212175	0	0.083006	0
ENSG00000253309	SERPINE3	647174	serpin family E member 3	1.67695	0.0362612		12.8819	30.4543	39.1349	5.10382	13.3403	7.41915	0.06471	0.149213	0.196203	0.023365	0.068173	0.054332
ENSG00000253595	LINC01300	731779	long intergenic non-protein coding RNA 1300	-2.83786	0.0115461		2.76041	4.6143	0	17.353	12.2286	24.1122	0.029915	0.059975	0	0.289694	0.17083	0.349691
ENSG00000253708	NA	NA	NA	-3.82624	0.0320057		1.84027	0	0	14.2907	8.89353	3.70958	0.031176	0	0	0.284191	0.179501	0.070551
ENSG00000253770	NA	NA	NA	-5.47859	0.0220719		0	0	0	18.3738	0	5.56436	0	0	0	0.384341	0	0.109139
ENSG00000253921	NA	NA	NA	5.20098	0.0359229		11.9618	0	8.69664	0	0	0	0.237325	0	0.173605	0	0	0
ENSG00000254010	NA	NA	NA	-5.22753	0.0126301		0	0	0	5.10382	6.67014	8.34655	0	0	0	0.11812	0.138187	0.192373
ENSG00000254198	NA	NA	NA	1.06203	0.000557129	0.0139547	172.986	131.969	140.233	79.6196	61.143	72.3367	5.05684	3.75901	4.05996	2.33258	1.79977	2.11416
ENSG00000254339	NA	NA	NA	-2.292	0.0420854		0	5.53715	6.52248	33.6852	10.0052	14.8383	0	0.061858	0.075929	0.453989	0.121921	0.241559
ENSG00000254452	NA	NA	NA	-1.82757	6.40688e-05		43.2464	24.9172	26.0899	101.056	162.307	72.3367	1.07974	0.589788	0.648861	2.62237	4.25274	1.85769
ENSG00000254454	NA	NA	NA	2.71503	0.0119816		23.9236	17.5343	16.3062	3.06229	0	5.56436	0.178486	0.129489	0.122804	0.018852	0	0.040569
ENSG00000254502	NA	NA	NA	-5.10407	0.0488701		0	0	0	4.08306	14.452	0	0	0	0	0.042965	0.141311	0
ENSG00000254551	NA	NA	NA	-5.15566	0.0416414		0	0	0	9.18688	10.0052	0	0	0	0	0.127324	0.139589	0
ENSG00000254593	NA	NA	NA	1.10034	0.00115008		106.736	126.432	114.143	62.2666	54.4729	45.4423	1.42087	1.63456	1.49755	0.836975	0.734708	0.604398
ENSG00000254639	NA	NA	NA	-1.24964	0.0366156		14.7222	21.2258	21.7416	23.4776	64.4781	49.1519	0.259692	0.371297	0.385673	0.420772	1.18595	0.883411
ENSG00000254806	SYS1-DBNDD2	767557	SYS1-DBNDD2 readthrough (NMD candidate)	1.07221	0.0452133	0.234396	40.486	148.58	173.933	42.8721	41.1326	88.1024	0.564787	1.67128	1.68296	0.680793	0.705463	1.11923
ENSG00000255139	NA	NA	NA	1.74119	0.00919411		92.9338	23.0715	38.0478	16.3322	11.1169	18.5479	1.81615	0.581863	0.72409	0.312122	0.279621	0.488356
ENSG00000255276	NA	NA	NA	-5.44175	0.0225169		0	0	0	0	12.2286	11.1287	0	0	0	0	0.4229	0.374839
ENSG00000255358	NA	NA	NA	5.15787	0.0151358		5.52082	3.69144	10.8708	0	0	0	0.117656	0.083578	0.239091	0	0	0
ENSG00000255518	NA	NA	NA	-2.91461	0.0271007		8.28123	0	0	26.5399	8.89353	27.8218	0.176146	0	0	0.560657	0.177408	0.593296
ENSG00000255730	NA	NA	NA	-7.48094	2.50617e-05	0.00139447	8.28123	3.69144	2.17416	2304.89	224.562	4.63697	0.164816	0.067862	0.036996	14.1322	1.4462	0.082269
ENSG00000256167	NA	NA	NA	4.79364	0.0352574		5.52082	4.6143	5.4354	0	0	0	0.02814	0.050115	0.048696	0	0	0
ENSG00000256195	LOC101928940	101928940	uncharacterized LOC101928940	-6.12452	0.00400243		0	0	0	0	13.3403	24.1122	0	0	0	0	0.0418	0.074425
ENSG00000256238	NA	NA	NA	3.44251	0.000907294		17.4826	50.7572	23.9158	2.04153	6.67014	0	0.06262	0.185845	0.089566	0.007679	0.025596	0
ENSG00000256443	NA	NA	NA	2.10503	0.0104532		20.243	20.3029	30.4382	5.10382	7.78184	3.70958	0.127775	0.126428	0.190709	0.026633	0.050361	0.021565
ENSG00000256642	NA	NA	NA	-5.14802	0.043867		0	0	0	0	14.452	4.63697	0	0	0	0	0.11046	0.030351
ENSG00000256884	LOC105370024	105370024	uncharacterized LOC105370024	5.54539	0.00480191		4.60068	6.46001	15.2191	0	0	0	0.075447	0.121627	0.309857	0	0	0
ENSG00000257159	NA	NA	NA	4.77989	0.0376619		3.68055	7.38287	4.34832	0	0	0	0.068543	0.134002	0.073252	0	0	0
ENSG00000257181	NA	NA	NA	2.82571	0.0345613		13.8021	19.38	20.6545	0	7.78184	0	0.207575	0.281463	0.298553	0	0.108102	0
ENSG00000257342	NA	NA	NA	5.8024	0.0290155		31.2847	0	0	0	0	0	0.518813	0	0	0	0	0
ENSG00000257588	LOC101927318	101927318	uncharacterized LOC101927318	2.39195	7.5715e-05		54.2881	45.2201	55.4411	5.10382	13.3403	11.1287	0.657695	0.583314	0.627091	0.047299	0.154701	0.118907
ENSG00000257735	NA	NA	NA	5.17719	0.0375616		13.8021	6.46001	0	0	0	0	0.281607	0.129392	0	0	0	0
ENSG00000257864	NA	NA	NA	2.52059	0.0221453		13.8021	14.7657	31.5253	6.12459	4.44676	0	0.27401	0.296315	0.644545	0.124254	0.093303	0
ENSG00000257875	NA	NA	NA	5.25425	0.0162893		7.3611	12.92	1.08708	0	0	0	0.173954	0.288776	0.018996	0	0	0
ENSG00000258274	LOC101928731	101928731	uncharacterized LOC101928731	5.41378	0.022749		0	11.9972	11.9579	0	0	0	0	0.080576	0.080897	0	0	0
ENSG00000258284	NA	NA	NA	-1.30603	0.0340842		11.9618	19.38	13.045	35.7268	26.6806	47.2971	0.8076	1.28551	0.880763	2.52051	1.84042	3.33318
ENSG00000258724	PINX1	54984	PIN2 (TERF1) interacting telomerase inhibitor 1	6.03673	0.0185865		36.8055	0	0	0	0	0	0.246239	0	0	0	0	0
ENSG00000258728	NA	NA	NA	-5.65516	0.0136836		0	0	0	0	12.2286	14.8383	0	0	0	0	0.161097	0.191313
ENSG00000258917	NA	NA	NA	3.6419	0.0164738		2.76041	11.9972	39.1349	0	4.44676	0	0.03282	0.168079	0.583735	0	0.067932	0
ENSG00000259080	NA	NA	NA	-1.18482	0.00219829	0.0356691	64.4096	92.2859	38.0478	162.302	168.977	113.142	0.435471	0.609886	0.250014	1.10675	1.16114	0.765786
ENSG00000259115	NA	NA	NA	-1.90277	0.0456067		2.76041	4.6143	5.4354	20.4153	13.3403	13.9109	0.046437	0.079545	0.094242	0.380712	0.255319	0.260242
ENSG00000259192	NA	NA	NA	5.52599	0.0170713		11.0416	14.7657	0	0	0	0	0.154585	0.217035	0	0	0	0
ENSG00000259375	NA	NA	NA	5.27725	0.0322159		5.52082	0	16.3062	0	0	0	0.059399	0	0.194804	0	0	0
ENSG00000259399	TGIF2-RAB5IF	100527943	TGIF2-RAB5IF readthrough	1.854	0.0119781		76.3714	50.7572	42.3961	9.18688	34.4624	3.70958	0.972973	0.630855	0.52867	0.108885	0.449452	0.037926
ENSG00000259402	NA	NA	NA	-4.87178	0.0409151		0	0	0	8.16611	6.67014	0.927394	0	0	0	0.171475	0.141327	0.005865
ENSG00000259448	NA	NA	NA	-1.20732	0.0265298		13.8021	55.3715	27.177	62.2666	72.2599	88.1024	0.110683	0.720988	0.311302	0.802491	0.912958	1.01767
ENSG00000259460	NA	NA	NA	4.94198	0.0279419		10.1215	2.76858	4.34832	0	0	0	0.245537	0.04615	0.086311	0	0	0
ENSG00000259604	NA	NA	NA	-1.69321	0.000765249		22.0833	17.5343	14.132	58.1836	51.1378	64.9176	0.256858	0.194445	0.152181	0.687732	0.610005	0.764677
ENSG00000259617	NA	NA	NA	5.89728	0.00106328		11.0416	14.7657	7.60956	0	0	0	0.243833	0.335882	0.176091	0	0	0
ENSG00000259673	IQCH-AS1	100506686	IQCH antisense RNA 1	-1.23256	0.0197671		40.486	11.9972	33.6995	73.495	60.0313	68.6272	0.080411	0.023149	0.155062	0.228362	0.154963	0.221081
ENSG00000259799	NA	NA	NA	-1.67665	0.0486055		7.3611	6.46001	5.4354	12.2492	17.7871	31.5314	0.163557	0.115378	0.105761	0.281572	0.370301	0.705214
ENSG00000259920	NA	NA	NA	-2.92633	0.011535		14.7222	0	0	29.6022	27.7923	55.6436	0.059954	0	0	0.117908	0.111764	0.227534
ENSG00000260092	NA	NA	NA	-5.28901	0.0356755		0	0	0	0	3.33507	17.6205	0	0	0	0	0.016448	0.096711
ENSG00000260266	PPIAP46	729739	peptidylprolyl isomerase A pseudogene 46	1.64454	0.000859605	0.0185171	174.826	218.718	195.674	32.6645	127.844	28.7492	0.688716	0.957833	0.769608	0.728169	0.575632	0.446807
ENSG00000260534	NA	NA	NA	-1.29474	0.0060757		23.9236	24.9172	34.7866	87.7857	67.8131	49.1519	0.128039	0.131726	0.184066	0.480902	0.375023	0.266878
ENSG00000260592	NA	NA	NA	-6.26753	0.000259893		0	0	0	17.353	16.6754	7.41915	0	0	0	0.315627	0.315089	0.135185
ENSG00000260600	NA	NA	NA	5.2418	0.0321036		11.9618	9.22859	0	0	0	0	0.065463	0.053058	0	0	0	0
ENSG00000260790	LOC440346	440346	uncharacterized LOC440346	-5.36157	0.00882418		0	0	0	10.2076	4.44676	7.41915	0	0	0	0.082711	0.037783	0.062185
ENSG00000260976	LINC01633	101929069	long intergenic non-protein coding RNA 1633	6.04393	0.00479395		0	23.9943	13.045	0	0	0	0	0.253951	0.140464	0	0	0
ENSG00000261186	NA	NA	NA	-6.6816	4.67048e-05		0	0	0	8.16611	32.239	14.8383	0	0	0	0.088103	0.338064	0.158973
ENSG00000261215	NA	NA	NA	-2.7488	0.00149988		6.44096	4.6143	1.08708	33.6852	22.2338	26.8944	0.022939	0.015973	0.000195	0.122253	0.07886	0.095849
ENSG00000261270	NA	NA	NA	-1.33138	0.0144695		35.8853	36.9144	14.132	97.9934	81.1534	40.8053	0.6986	0.698887	0.273692	1.93881	1.6111	0.795401
ENSG00000261342	NA	NA	NA	-1.55866	0.0128147		11.9618	11.0743	19.5674	59.2043	38.9092	26.8944	0.089079	0.080678	0.141161	0.444374	0.286707	0.198428
ENSG00000261427	NA	NA	NA	1.5108	0.0280312		115.017	37.8372	104.36	41.8513	4.44676	43.5875	1.67976	0.534747	1.50313	0.615127	0.056794	0.630539
ENSG00000261439	DKFZP434H168	26077	uncharacterized LOC26077	4.95626	0.0248306		3.68055	8.30573	5.4354	0	0	0	0.022852	0.045347	0.027083	0	0	0
ENSG00000261793	NA	NA	NA	-5.10563	0.01238		0	0	1.08708	0	10.0052	25.967	0	0	0.003013	0	0.250916	0.659936
ENSG00000261832	CLN3	1201	CLN3 lysosomal/endosomal transmembrane protein, battenin	-6.07083	0.00458598		0	0	0	0	22.2338	13.9109	0	0	0	0	0.147848	0.094044
ENSG00000261889	NA	NA	NA	-1.25303	0.0402305		9.20137	17.5343	22.8287	33.6852	35.5741	48.2245	0.139677	0.26365	0.356938	0.532637	0.554161	0.759233
ENSG00000261934	PCDHGA9	56107	protocadherin gamma subfamily A, 9	2.43054	0.000162485		154.583	77.5202	27.177	20.4153	10.0052	17.6205	0.395506	0.230603	0.119351	0.094948	0.041637	0.080942
ENSG00000262188	LINC01978	101928738	long intergenic non-protein coding RNA 1978	-1.24325	0.00860273		21.1632	27.6858	34.7866	80.6404	48.9144	67.6998	0.388047	0.358988	0.40786	1.35223	0.794527	0.882024
ENSG00000262558	NA	NA	NA	5.00637	0.0232204		2.76041	5.53715	9.78372	0	0	0	0.032172	0.067689	0.121038	0	0	0
ENSG00000262576	PCDHGA4	56111	protocadherin gamma subfamily A, 4	-4.62412	0.00077184		0	0	5.4354	8.16611	5.55845	114.997	0	0	0.018983	0.036243	0.019867	0.289276
ENSG00000262662	NA	NA	NA	-5.42747	0.00828756		0	0	0	8.16611	12.2286	2.78218	0	0	0	0.162158	0.259045	0.057481
ENSG00000262777	NA	NA	NA	-1.08959	0.0409546		18.4027	18.4572	29.3512	40.8306	58.9196	40.8053	0.363888	0.440641	0.597394	0.850812	1.23238	0.847047
ENSG00000263154	NA	NA	NA	-5.25799	0.0336257		0	0	0	0	12.2286	8.34655	0	0	0	0	0.206525	0.132539
ENSG00000263316	NA	NA	NA	4.76427	0.0403632		8.28123	3.69144	3.26124	0	0	0	0.181632	0.060683	0.065557	0	0	0
ENSG00000263499	LOC101927539	101927539	uncharacterized LOC101927539	4.324	0.0292936		1.84027	9.22859	10.8708	0	1.11169	0	0.012743	0.072275	0.084456	0	0.006563	0
ENSG00000263606	NA	NA	NA	2.37265	0.0432437		36.8055	36.9144	1.08708	1.02076	8.89353	4.63697	0.343945	0.336883	0.000808	0.009902	0.084311	0.039746
ENSG00000263709	NA	NA	NA	-5.10727	0.0182662		0	0	0	4.08306	8.89353	5.56436	0	0	0	0.115825	0.306231	0.17198
ENSG00000263798	NA	NA	NA	5.37984	0.0309754		21.1632	0	2.17416	0	0	0	0.43381	0	0.023232	0	0	0
ENSG00000264007	NA	NA	NA	-1.52397	0.00520805		9.20137	33.2229	32.6124	80.6404	73.3716	61.208	0.170355	0.592838	0.582348	1.49481	1.36505	1.13581
ENSG00000264058	NA	NA	NA	-1.61648	0.0324177		4.60068	26.7629	9.78372	53.0797	52.2495	21.3301	0.018059	0.121708	0.04553	0.253235	0.25058	0.099429
ENSG00000264529	NA	NA	NA	-5.47838	0.00583771		0	0	0	8.16611	5.55845	10.2013	0	0	0	0.146096	0.081998	0.183847
ENSG00000264771	NA	NA	NA	-4.24813	0.0359719		0	0	1.08708	9.18688	8.89353	1.85479	0	0	0.058564	0.796746	0.76346	0.092096
ENSG00000264801	NA	NA	NA	3.04306	0.000176065		29.4444	62.7544	31.5253	1.02076	5.55845	8.34655	0.210256	0.442435	0.226937	5.6e-05	0.04057	0.056598
ENSG00000265787	CYP4F35P	284233	cytochrome P450 family 4 subfamily F member 35, pseudogene	6.08954	0.000435399		13.8021	9.22859	15.2191	0	0	0	0.053469	0.036953	0.06181	0	0	0
ENSG00000266261	NA	NA	NA	2.34076	0.00721395		13.8021	28.6086	47.8315	4.08306	11.1169	2.78218	0.278798	0.56898	0.965249	0.074572	0.218706	0.03861
ENSG00000266924	NA	NA	NA	-1.44823	0.0243643		10.1215	13.8429	14.132	43.8929	37.7975	22.2575	0.187774	0.24389	0.250231	0.814799	0.701625	0.400735
ENSG00000266941	NA	NA	NA	-4.84714	0.0344047		0	0	0	5.10382	6.67014	3.70958	0	0	0	0.177653	0.213383	0.113475
ENSG00000266968	NA	NA	NA	-5.21146	0.0394597		0	0	0	4.08306	0	15.7657	0	0	0	0.027319	0	0.098755
ENSG00000267062	NA	NA	NA	-5.80077	0.00246929		0	0.922859	0	0	10.0052	48.2245	0	0.002988	0	0	0.369368	1.92487
ENSG00000267179	NA	NA	NA	6.19561	0.00054504		17.4826	20.3029	3.26124	0	0	0	0.127065	0.200372	0.051772	0	0	0
ENSG00000267343	NA	NA	NA	5.47349	0.0192644		11.0416	13.8429	0	0	0	0	0.078858	0.097992	0	0	0	0
ENSG00000267365	KCNJ2-AS1	400617	KCNJ2 antisense RNA 1	-1.0678	0.0363241		30.3645	19.38	31.5253	66.3497	36.6858	66.7724	0.142613	0.087274	0.146427	0.31951	0.175143	0.324835
ENSG00000267372	NA	NA	NA	-1.00846	0.000137234	0.0049354	114.097	86.7488	106.534	197.008	232.343	189.188	1.08152	0.803633	1.00401	1.89691	2.24608	1.80982
ENSG00000267387	NA	NA	NA	-1.10328	0.0482815		16.5625	29.5315	20.6545	37.7683	68.9248	37.0958	0.139179	0.249824	0.174725	0.333761	0.613867	0.324745
ENSG00000267426	NA	NA	NA	1.02729	0.00667996	0.0735799	621.092	360.838	186.978	250.087	127.844	195.68	3.49745	1.93697	0.705036	1.42784	0.672722	0.762823
ENSG00000267441	NA	NA	NA	-4.90583	0.00146167		4.60068	7.38287	1.08708	2.04153	243.46	148.383	0.080981	0.129555	0.00063	0.040545	4.95366	2.98452
ENSG00000267526	NA	NA	NA	4.70565	0.043426		3.68055	5.53715	5.4354	0	0	0	0.029884	0.043097	0.035302	0	0	0
ENSG00000267532	MIR497HG	100506755	mir-497-195 cluster host gene	2.6998	2.76363e-05		23.0034	119.049	153.278	13.2699	14.452	17.6205	0.070051	0.49232	0.556927	0.03819	0.044498	0.138616
ENSG00000267741	NA	NA	NA	-4.86285	0.0353532		0	0	0	3.06229	8.89353	3.70958	0	0	0	0.073568	0.230442	0.091178
ENSG00000267952	NA	NA	NA	3.39492	0.00148979		40.486	73.8287	35.8736	14.2907	0	0	0.752988	1.33285	0.654706	0.261371	0	0
ENSG00000268041	LOC390937	390937	ETS domain-containing transcription factor ERF	1.30082	0.0476965		42.3263	60.9087	23.9158	21.4361	7.78184	22.2575	0.764113	1.13425	0.402884	0.419698	0.160069	0.396956
ENSG00000268083	NA	NA	NA	-3.49461	0.040338		1.84027	0	4.34832	1.02076	0	67.6998	0.032712	0	0.120379	0.035302	0	0.972911
ENSG00000268465	NA	NA	NA	5.10996	0.0433405		13.8021	5.53715	0	0	0	0	0.346011	0.131089	0	0	0	0
ENSG00000268790	NA	NA	NA	4.23052	0.0171241		34.0451	1.84572	2.17416	0	1.11169	0.927394	0.615363	0.007677	0.030006	0	0.003794	0.00347
ENSG00000268870	NA	NA	NA	5.15822	0.03892		9.20137	0	10.8708	0	0	0	0.16685	0	0.186563	0	0	0
ENSG00000268896	NA	NA	NA	6.09519	0.000508202		15.6423	6.46001	16.3062	0	0	0	0.390628	0.164409	0.415803	0	0	0
ENSG00000268902	CSAG2	102723547	CSAG family member 2	-1.49707	0.0243528		12.8819	13.8429	6.52248	32.6645	31.1273	30.604	0.187988	0.267727	0.097114	0.552323	0.515239	0.496496
ENSG00000268916	CSAG3	389903	CSAG family member 3	-2.71205	0.000139074		8.28123	9.22859	3.26124	70.4327	28.904	38.0232	0.116507	0.187798	0.035102	1.05971	0.435888	0.561208
ENSG00000268949	NA	NA	NA	5.04275	0.0191328		4.60068	7.38287	6.52248	0	0	0	0.013908	0.027236	0.020579	0	0	0
ENSG00000269553	NA	NA	NA	-3.14748	0.0393683		0	3.69144	0	10.2076	11.1169	12.0561	0	0.097988	0	0.277645	0.289705	0.324429
ENSG00000269560	NA	NA	NA	-2.36771	0.00650164		4.60068	4.6143	4.34832	13.2699	35.5741	21.3301	0.100629	0.098873	0.089712	0.283413	0.797956	0.456327
ENSG00000269952	NA	NA	NA	-1.57239	0.00864668		11.0416	15.6886	25.0028	31.6437	73.3716	48.2245	0.358657	0.529733	0.855436	1.1102	2.61674	1.68253
ENSG00000269954	NA	NA	NA	-2.50489	0.0459392		2.76041	3.69144	0	16.3322	8.89353	12.0561	0.054416	0.084573	0	0.387026	0.212153	0.268729
ENSG00000270019	NA	NA	NA	1.24176	0.00276674		87.413	67.3687	77.1827	27.5606	33.3507	37.0958	0.667848	0.496003	0.578314	0.207599	0.256824	0.279656
ENSG00000270082	NA	NA	NA	4.96865	0.0231016		4.60068	6.46001	6.52248	0	0	0	0.113361	0.157189	0.150862	0	0	0
ENSG00000270084	NA	NA	NA	1.32561	0.00099223		85.5727	107.052	78.2698	43.8929	28.904	35.241	1.44586	1.77234	1.31337	0.742487	0.490201	0.601984
ENSG00000270130	NA	NA	NA	-3.88038	0.00320752		0.920137	0.922859	1.08708	20.4153	13.3403	9.27394	0.00742	0.009687	0.021929	0.45779	0.282838	0.20115
ENSG00000270178	NA	NA	NA	-5.08051	0.0187522		0	0	0	6.12459	5.55845	6.49176	0	0	0	0.203189	0.194036	0.228078
ENSG00000270181	NA	NA	NA	-12.9603	0.000908752	0.0193356	0	0	0	0	2753.66	1529.27	0	0	0	0	7.96491	4.37105
ENSG00000270562	NA	NA	NA	-5.75066	0.0133467		0	0	0	24.4983	4.44676	0	0	0	0	0.118602	0.021671	0
ENSG00000270911	NA	NA	NA	5.0875	0.0475651		14.7222	0	4.34832	0	0	0	0.136177	0	0.040833	0	0	0
ENSG00000271275	NA	NA	NA	-4.48688	0.0243236		0	0.922859	0	17.353	3.33507	2.78218	0	0.022336	0	0.445418	0.078209	0.053884
ENSG00000271698	NA	NA	NA	-3.44617	0.00747758		0.920137	0.922859	2.17416	8.16611	26.6806	8.34655	7.4e-05	0.000281	0.01285	0.059305	0.195191	0.056014
ENSG00000271723	MROH7-TTC4	100527960	MROH7-TTC4 readthrough (NMD candidate)	-4.25206	0.0119034	0.106891	0	66.4459	6.52248	500.175	302.38	588.895	0	0.131078	0.011933	0.992229	0.599373	1.14623
ENSG00000271840	NA	NA	NA	1.88236	0.0380102		25.7638	10.1514	20.6545	4.08306	6.67014	4.63697	0.405839	0.152719	0.30754	0.058675	0.092916	0.058916
ENSG00000271855	NA	NA	NA	-1.68469	0.00149576		21.1632	11.0743	28.2641	56.142	55.5845	81.6107	0.27301	0.139976	0.368701	0.763822	0.754896	1.09495
ENSG00000271963	NA	NA	NA	5.04013	0.0481425		11.0416	7.38287	0	0	0	0	0.31539	0.192114	0	0	0	0
ENSG00000272341	NA	NA	NA	-1.01546	0.00764274	0.0806673	52.4478	71.0601	48.9186	149.032	80.0417	119.634	0.24059	0.321057	0.224348	0.697982	0.375937	0.557783
ENSG00000272347	NA	NA	NA	-1.30462	0.000154187	0.00541306	53.3679	83.9802	71.7473	131.679	231.232	153.947	0.39541	0.611267	0.527366	0.991612	1.74768	1.1534
ENSG00000272384	NA	NA	NA	-5.33075	0.0335969		0	0	0	0	18.8987	2.78218	0	0	0	0	0.248663	0.029209
ENSG00000272425	NA	NA	NA	-5.34704	0.029958		0	0	0	16.3322	5.55845	0	0	0	0	0.089807	0.024614	0
ENSG00000272523	LINC01023	100652853	long intergenic non-protein coding RNA 1023	-1.49363	0.0293203		4.60068	19.38	41.309	57.1628	81.1534	44.5149	0.117152	0.495007	1.11186	1.56511	2.23087	1.2055
ENSG00000272617	NA	NA	NA	3.12329	0.0113012		11.0416	52.603	27.177	0	0	10.2013	0.139716	0.684362	0.351227	0	0	0.135971
ENSG00000272791	NA	NA	NA	-1.11994	0.0442491		23.9236	28.6086	32.6124	84.7234	25.5689	74.1915	0.299374	0.342061	0.40975	1.07423	0.316772	0.941245
ENSG00000273000	NA	NA	NA	2.56202	0.00168021	0.0297416	731.509	643.233	771.827	57.1628	266.806	39.8779	3.20075	2.74362	3.81058	0.956368	1.12228	0.535793
ENSG00000273100	NA	NA	NA	-1.71207	0.0366603		6.44096	8.30573	11.9579	10.2076	51.1378	25.967	0.075072	0.086989	0.133439	0.118264	0.624093	0.306536
ENSG00000273139	NA	NA	NA	-6.32971	0.000294568		0	0	0	17.353	4.44676	21.3301	0	0	0	0.434168	0.114973	0.543363
ENSG00000273186	NA	NA	NA	-1.1751	0.00998036		58.8888	21.2258	63.0506	129.637	88.9353	103.868	1.70228	0.585351	1.78642	3.77047	2.60646	2.99506
ENSG00000273257	NA	NA	NA	5.34609	0.0128682		3.68055	1.84572	17.3933	0	0	0	0.123095	0.033431	0.630488	0	0	0
ENSG00000273336	NA	NA	NA	3.40261	0.00799667		14.7222	11.0743	16.3062	2.04153	0	1.85479	0.326699	0.222414	0.338631	0.041171	0	0.031419
ENSG00000273338	NA	NA	NA	3.18333	0.0333353		13.8021	19.38	2.17416	1.02076	0	2.78218	0.759565	1.06596	0.108356	0.025666	0	0.112457
ENSG00000273398	NA	NA	NA	3.74608	0.0397968		0	0.922859	40.222	1.02076	1.11169	0.927394	0	0.002475	0.202447	0.003526	0.001866	0.002122
ENSG00000273451	NA	NA	NA	5.59546	0.00398276		4.60068	7.38287	15.2191	0	0	0	0.043273	0.084741	0.174675	0	0	0
ENSG00000273551	NA	NA	NA	-2.10183	0.0158502		5.52082	7.38287	2.17416	24.4983	16.6754	24.1122	0.121334	0.151983	0.037197	0.539387	0.35843	0.533092
ENSG00000273730	NA	NA	NA	1.70925	0.0129977		44.1666	30.4543	278.292	30.6229	40.0209	37.0958	3.39762	2.26711	21.3629	2.37719	3.07294	2.87765
ENSG00000274080	NA	NA	NA	-1.18865	0.00732189	0.078412	111.337	34.1458	43.4832	143.928	134.515	153.02	0.587105	0.173212	0.226652	0.765026	0.720547	0.807708
ENSG00000274373	NA	NA	NA	3.08099	0.0450009		17.4826	8.30573	8.69664	4.08306	0	0	0.281779	0.120921	0.144672	0.064329	0	0
ENSG00000274501	NA	NA	NA	1.56509	0.0430336		30.3645	23.0715	28.2641	9.18688	3.33507	14.8383	1.15328	0.864101	1.06839	0.353787	0.092016	0.549186
ENSG00000274810	NPHP3-ACAD11	100532724	NPHP3-ACAD11 readthrough (NMD candidate)	-1.14755	0.0249447	0.164495	92.9338	48.9115	31.5253	214.361	101.164	69.5545	0.775556	0.216661	0.397488	1.58031	0.579895	0.244166
ENSG00000275104	NA	NA	NA	1.33092	0.0178067	0.13617	105.816	63.6773	431.571	60.2251	103.387	75.1189	6.90793	4.04729	28.1502	3.99285	6.83812	4.9138
ENSG00000275345	NA	NA	NA	4.70565	0.043426		3.68055	5.53715	5.4354	0	0	0	0.105406	0.153091	0.126159	0	0	0
ENSG00000275374	NA	NA	NA	-5.26268	0.032901		0	0	0	12.2492	0	8.34655	0	0	0	0.195844	0	0.11799
ENSG00000275381	NA	NA	NA	1.46832	0.0484737		13.8021	28.6086	39.1349	9.18688	10.0052	10.2013	0.371137	0.770587	1.07333	0.234838	0.274231	0.264761
ENSG00000275708	MIR3648-1	100500862	microRNA 3648-1	1.17996	0.0419949		65.3297	23.9943	104.36	28.5814	28.904	27.8218	4.242	1.50631	6.78577	1.89185	1.87579	1.82258
ENSG00000275720	NA	NA	NA	5.30558	0.0103997		5.52082	3.69144	13.045	0	0	0	0.09006	0.066756	0.243249	0	0	0
ENSG00000275757	NA	NA	NA	1.76567	0.00416989	0.054508	80.0519	53.5258	452.225	48.9967	65.5898	57.4984	6.14906	4.02607	34.6674	3.75279	5.15285	4.43873
ENSG00000275981	NA	NA	NA	-4.50631	0.0414748		0.920137	0	0	16.3322	0	7.41915	0.014799	0	0	0.549357	0	0.239281
ENSG00000276150	NA	NA	NA	-1.39181	0.0435899		7.3611	42.4515	10.8708	39.8098	57.8079	62.1354	0.516013	3.0686	0.744178	3.00792	4.35432	4.6675
ENSG00000276214	NA	NA	NA	5.42173	0.00772413		2.76041	8.30573	13.045	0	0	0	0.03822	0.123371	0.208469	0	0	0
ENSG00000276496	NA	NA	NA	3.37132	0.0168831		1.84027	1.84572	59.7894	2.04153	2.22338	1.85479	0.147097	0.124438	7.15196	0.138063	0.172995	0.125095
ENSG00000276644	DACH1	1602	dachshund family transcription factor 1	-1.30312	0.0403388		15.6423	52.603	19.5674	27.5606	103.387	86.2476	0.033275	0.114035	0.043927	0.061328	0.235422	0.195238
ENSG00000276700	NA	NA	NA	1.80198	0.0461328	0.236519	96.6144	68.2916	539.192	56.142	78.93	66.7724	7.39966	5.14141	41.3473	4.37061	6.17996	5.16488
ENSG00000276797	NA	NA	NA	-2.51209	0.0213212		3.68055	1.84572	2.17416	8.16611	21.1221	14.8383	0.530279	0.192687	0.33355	1.27369	3.40793	2.38122
ENSG00000277209	RPPH1	85495	ribonuclease P RNA component H1	3.00978	0.0316583		34.0451	4.6143	265.247	16.3322	5.55845	15.7657	1.20227	0.128002	9.34769	0.584304	0.160548	0.529361
ENSG00000277245	NA	NA	NA	-4.01788	0.0173364		0.920137	0.922859	0	17.353	2.22338	11.1287	0.018578	0.013766	0	0.33832	0.035148	0.224921
ENSG00000277687	NA	NA	NA	-1.41914	0.0359039		27.6041	8.30573	13.045	38.789	66.7014	25.967	0.276509	0.074689	0.130423	0.386525	0.674765	0.260915
ENSG00000277739	NA	NA	NA	1.70953	0.0152032		37.7256	24.9172	214.155	25.5191	31.1273	27.8218	2.88108	1.82696	16.4037	1.91267	2.40585	2.11101
ENSG00000277775	HIST1H3F	8968	histone cluster 1 H3 family member f	1.84125	0.0397684		20.243	17.5343	68.486	21.4361	4.44676	3.70958	0.562429	0.472916	1.92853	0.613422	0.130079	0.09543
ENSG00000277806	NA	NA	NA	1.18844	0.04284		58.8888	36.9144	53.2669	13.2699	36.6858	15.7657	1.08832	0.663349	0.978673	0.241006	0.677978	0.294259
ENSG00000278163	NA	NA	NA	1.87708	0.026527		19.3229	12.92	196.761	20.4153	16.6754	25.0396	2.00119	1.23325	20.2527	2.12999	1.68989	2.57062
ENSG00000278189	RNA5-8SN1	106632260	RNA, 5.8S ribosomal N1	1.63277	0.0252276		36.8055	19.38	206.545	26.5399	31.1273	26.8944	2.83905	1.39715	15.8556	2.00544	2.37619	2.02436
ENSG00000278272	HIST1H3C	8352	histone cluster 1 H3 family member c	1.82434	0.00825234		25.7638	41.5287	132.624	28.5814	16.6754	11.1287	0.741079	1.15291	3.78663	0.807613	0.487796	0.302016
ENSG00000278463	HIST1H2AB	8335	histone cluster 1 H2A family member b	5.76093	0.0115634		5.52082	0	25.0028	0	0	0	0.156555	0	0.730489	0	0	0
ENSG00000278637	HIST1H4A	8359	histone cluster 1 H4 family member a	6.15978	0.0148764		0	0	40.222	0	0	0	0	0	1.503	0	0	0
ENSG00000278705	HIST1H4B	8366	histone cluster 1 H4 family member b	5.5346	0.0469547		0	0	26.0899	0	0	0	0	0	0.695869	0	0	0
ENSG00000278709	NKILA	105416157	NF-kappaB interacting lncRNA	-1.13776	0.0205022		30.3645	25.8401	34.7866	38.789	88.9353	72.3367	0.13405	0.114847	0.156904	0.177817	0.411086	0.330039
ENSG00000278743	NA	NA	NA	-6.11961	0.000607197		0	0	0	12.2492	5.55845	19.4753	0	0	0	0.255762	0.093466	0.385221
ENSG00000278766	NA	NA	NA	1.18613	0.0140047		48.7673	63.6773	48.9186	25.5191	22.2338	23.1848	0.902716	1.13219	0.846984	0.474282	0.383826	0.409334
ENSG00000278966	NA	NA	NA	-1.58542	0.0441334		13.8021	3.69144	10.8708	41.8513	25.5689	17.6205	0.308185	0.113666	0.261241	0.937999	0.669552	0.23787
ENSG00000279042	NA	NA	NA	4.79294	0.0400258		8.28123	1.84572	5.4354	0	0	0	0.034427	0.005281	0.020199	0	0	0
ENSG00000279114	NA	NA	NA	-2.81419	0.0408174		0	3.69144	1.08708	13.2699	12.2286	8.34655	0	0.006629	0.001642	0.022752	0.020786	0.013707
ENSG00000279129	NA	NA	NA	5.05606	0.0477213		0	11.0743	7.60956	0	0	0	0	0.04999	0.029954	0	0	0
ENSG00000279261	PP2672	100130249	uncharacterized LOC100130249	-3.50505	0.0278658		0	0	3.26124	12.2492	4.44676	18.5479	0	0	0.010904	0.059922	0.020411	0.090334
ENSG00000279314	NA	NA	NA	-4.46541	0.0488142		0.920137	0	0	19.3945	0	3.70958	0.005636	0	0	0.135292	0	0.024815
ENSG00000279448	NA	NA	NA	-5.08101	0.0209169		0	0	0	10.2076	3.33507	4.63697	0	0	0	0.325102	0.101698	0.127311
ENSG00000279482	NA	NA	NA	-5.07661	0.0484967		0	0	0	8.16611	10.0052	0	0	0	0	0.136597	0.16498	0
ENSG00000279608	NA	NA	NA	1.24876	0.000331346	0.00969383	167.465	107.052	131.537	58.1836	66.7014	46.3697	0.345696	0.216786	0.268998	0.119732	0.14036	0.096506
ENSG00000279829	NA	NA	NA	2.96394	0.0456898		6.44096	20.3029	13.045	5.10382	0	0	0.050793	0.170045	0.109806	0.035414	0	0
ENSG00000280048	NA	NA	NA	5.02997	0.0200795		8.28123	4.6143	5.4354	0	0	0	0.025428	0.012449	0.014919	0	0	0
ENSG00000280102	NA	NA	NA	9.37107	1.87314e-14	1.31521e-11	816.162	0.922859	1202.31	1.02076	1.11169	0.927394	120.554	0.058869	176.49	0.083341	0.028336	0.010693
ENSG00000280132	NA	NA	NA	-1.67721	0.00862058		11.9618	7.38287	15.2191	43.8929	35.5741	30.604	0.068555	0.044601	0.090545	0.269126	0.224234	0.185608
ENSG00000280316	NA	NA	NA	1.08745	0.0212066		62.5693	100.592	73.9214	43.8929	20.0104	47.2971	0.352686	0.551392	0.414682	0.245456	0.112274	0.267432
ENSG00000280392	NA	NA	NA	2.4898	0.0419106		19.3229	25.8401	4.34832	4.08306	0	4.63697	0.063219	0.086661	0.014836	0.012558	0	0.01408
ENSG00000281280	NA	NA	NA	4.54008	0.00423652		0.920137	1.84572	68.486	1.02076	1.11169	0.927394	0.110087	0.161331	9.84762	0.103193	0.106374	0.10479
ENSG00000281808	NA	NA	NA	4.82784	1.50576e-05		1.84027	92.2859	79.3568	2.04153	2.22338	1.85479	0.157851	8.03168	7.05082	0.126365	0.168506	0.151481
ENSG00000282793	NA	NA	NA	5.90952	0.0012375		18.4027	5.53715	9.78372	0	0	0	0.69541	0.171716	0.331748	0	0	0
ENSG00000282882	NA	NA	NA	-2.13854	0.0419618		13.8021	0	4.34832	24.4983	40.0209	15.7657	0.098827	0	0.032516	0.181017	0.299052	0.113487
ENSG00000282950	NA	NA	NA	1.52171	0.0462982		33.1249	15.6886	28.2641	9.18688	12.2286	5.56436	0.472791	0.215448	0.402122	0.118219	0.162008	0.069371
