# Supplementary material for: Ox-LDL-mediated ILF3 overexpression in gastric cancer progression by activating the PI3K/AKT/mTOR signaling pathway
Source: Aging (Albany NY). 2022 May 4;14(9):3887–909. doi: 10.18632/aging.204051 (PMC9134943; doi:10.18632/aging.204051)
Supplement: Supplementary Table 2 [file aging-14-204051-s002.xlsx]

## Sheet: BP
Supplementary Table 2. The functional characteristics of ILF3 by GO analysis.
EPMA Journal:Ox-LDL-mediated ILF3 overexpression in gastric cancer progression by activating the PI3K/AKT/mTOR signalling pathway: Potential for target therapy in the context of 3P medcine
Danping Sun, Mingxiang Zhang, Meng Wei,Zhaoyang Wang,Wen Qiao, Peng Liu, Xin Zhong,Yize Liang,Yuanyuan Chen,Yadi Huang,Wenbin Yu*
*Corresponding author: Wenbin Yu; Department of Gastrointestinal Surgery, General Surgery, Qilu Hospital, Cheeloo College of Medicine, Shandong University, 107 West Wen Hua Road,Jinan, 250012, China. email: wenbin_yu2003@163.com
ONTOLOGY	ID	Description	GeneRatio	BgRatio	pvalue	p.adjust	qvalue	geneID	Count
BP	GO:0002313	mature B cell differentiation involved in immune response	4/221	19/17913	7.55578e-05	0.113601	0.10415	MFNG/NKX2-3/C17orf99/DLL1	4
BP	GO:0090023	positive regulation of neutrophil chemotaxis	4/221	24/17913	0.000197355	0.114652	0.105114	CD74/RIPOR2/CCR7/C5AR1	4
BP	GO:0002335	mature B cell differentiation	4/221	25/17913	0.000232685	0.114652	0.105114	MFNG/NKX2-3/C17orf99/DLL1	4
BP	GO:0048596	embryonic camera-type eye morphogenesis	4/221	25/17913	0.000232685	0.114652	0.105114	PAX2/TBX2/HIPK1/FRS2	4
BP	GO:0071624	positive regulation of granulocyte chemotaxis	4/221	26/17913	0.000272347	0.114652	0.105114	CD74/RIPOR2/CCR7/C5AR1	4
BP	GO:0045637	regulation of myeloid cell differentiation	11/221	250/17913	0.000286314	0.114652	0.105114	CD74/AGO1/ID2/ACVR1B/PRKCB/ISG15/DLL1/HIST1H3F/HIST1H3C/HIST1H4A/HIST1H4B	11
BP	GO:1902624	positive regulation of neutrophil migration	4/221	27/17913	0.000316638	0.114652	0.105114	CD74/RIPOR2/CCR7/C5AR1	4
BP	GO:0051187	cofactor catabolic process	5/221	50/17913	0.000368406	0.114652	0.105114	HMOX1/ALDH1L2/CYP4F11/HBA2/HBA1	5
BP	GO:0090022	regulation of neutrophil chemotaxis	4/221	30/17913	0.000480328	0.114652	0.105114	CD74/RIPOR2/CCR7/C5AR1	4
BP	GO:0051290	protein heterotetramerization	5/221	53/17913	0.000484255	0.114652	0.105114	CD74/HIST1H3F/HIST1H3C/HIST1H4A/HIST1H4B	5
BP	GO:0051153	regulation of striated muscle cell differentiation	7/221	115/17913	0.000561577	0.114652	0.105114	CEACAM5/RIPOR2/TRIM32/FRS2/GREM1/MAMSTR/DLL1	7
BP	GO:0030099	myeloid cell differentiation	14/221	411/17913	0.000608706	0.114652	0.105114	CD74/AGO1/ID2/NKX2-3/CCR7/ACVR1B/PRKCB/ISG15/PRTN3/DLL1/HIST1H3F/HIST1H3C/HIST1H4A/HIST1H4B	14
BP	GO:0006335	DNA replication-dependent nucleosome assembly	4/221	32/17913	0.000618232	0.114652	0.105114	HIST1H3F/HIST1H3C/HIST1H4A/HIST1H4B	4
BP	GO:0034723	DNA replication-dependent nucleosome organization	4/221	32/17913	0.000618232	0.114652	0.105114	HIST1H3F/HIST1H3C/HIST1H4A/HIST1H4B	4
BP	GO:0048145	regulation of fibroblast proliferation	6/221	86/17913	0.000681384	0.114652	0.105114	CD74/MYB/TRIM32/PDGFC/NUPR1/DACH1	6
BP	GO:0048048	embryonic eye morphogenesis	4/221	33/17913	0.000696758	0.114652	0.105114	PAX2/TBX2/HIPK1/FRS2	4
BP	GO:0050900	leukocyte migration	15/221	467/17913	0.000716343	0.114652	0.105114	CD74/APOB/HMOX1/CEACAM5/RIPOR2/PADI2/NKX2-3/CCR7/ITGB7/GREM1/CXCL11/PTAFR/PRTN3/C5AR1/PSG1	15
BP	GO:0048144	fibroblast proliferation	6/221	87/17913	0.000724438	0.114652	0.105114	CD74/MYB/TRIM32/PDGFC/NUPR1/DACH1	6
BP	GO:1902622	regulation of neutrophil migration	4/221	34/17913	0.000782088	0.117587	0.107805	CD74/RIPOR2/CCR7/C5AR1	4
BP	GO:0031076	embryonic camera-type eye development	4/221	36/17913	0.000974431	0.139529	0.127922	PAX2/TBX2/HIPK1/FRS2	4
BP	GO:0006586	indolalkylamine metabolic process	3/221	17/17913	0.00110863	0.151529	0.138923	KMO/DDC/IDO2	3
BP	GO:0007156	homophilic cell adhesion via plasma membrane adhesion molecules	7/221	130/17913	0.00115941	0.151581	0.138971	PCDHA6/CEACAM5/PCDH1/CDH16/CDHR4/PCDHGA9/PCDHGA4	7
BP	GO:0043523	regulation of neuron apoptotic process	9/221	210/17913	0.00122049	0.152917	0.140195	PAK3/HMOX1/FGF8/MYB/EGLN3/RAPSN/NUPR1/C5AR1/CLN3	9
BP	GO:0000183	chromatin silencing at rDNA	4/221	39/17913	0.00132193	0.159001	0.145774	HIST1H3F/HIST1H3C/HIST1H4A/HIST1H4B	4
BP	GO:0002688	regulation of leukocyte chemotaxis	6/221	105/17913	0.0019226	0.215401	0.197482	CD74/RIPOR2/PADI2/CCR7/GREM1/C5AR1	6
BP	GO:1990266	neutrophil migration	5/221	72/17913	0.00195432	0.215401	0.197482	CD74/RIPOR2/CCR7/PRTN3/C5AR1	5
BP	GO:0071622	regulation of granulocyte chemotaxis	4/221	44/17913	0.00207948	0.215401	0.197482	CD74/RIPOR2/CCR7/C5AR1	4
BP	GO:0002685	regulation of leukocyte migration	8/221	186/17913	0.00221128	0.215401	0.197482	CD74/HMOX1/RIPOR2/PADI2/CCR7/GREM1/PTAFR/C5AR1	8
BP	GO:0030834	regulation of actin filament depolymerization	4/221	45/17913	0.00226057	0.215401	0.197482	SPTB/ACTN2/SH3BP1/PLEKHH2	4
BP	GO:0048593	camera-type eye morphogenesis	6/221	109/17913	0.00232301	0.215401	0.197482	PAX2/TBX2/HIPK1/FRS2/LCTL/DLL1	6
BP	GO:0008064	regulation of actin polymerization or depolymerization	7/221	147/17913	0.00234465	0.215401	0.197482	SPTB/PAK3/ACTN2/SH3BP1/CCR7/PLEKHH2/CDC42EP5	7
BP	GO:0030832	regulation of actin filament length	7/221	148/17913	0.00243584	0.215401	0.197482	SPTB/PAK3/ACTN2/SH3BP1/CCR7/PLEKHH2/CDC42EP5	7
BP	GO:0030539	male genitalia development	3/221	23/17913	0.00273418	0.215401	0.197482	FGF8/HOXD13/HSD17B3	3
BP	GO:0042430	indole-containing compound metabolic process	3/221	23/17913	0.00273418	0.215401	0.197482	KMO/DDC/IDO2	3
BP	GO:0051402	neuron apoptotic process	9/221	238/17913	0.00286274	0.215401	0.197482	PAK3/HMOX1/FGF8/MYB/EGLN3/RAPSN/NUPR1/C5AR1/CLN3	9
BP	GO:0006813	potassium ion transport	8/221	194/17913	0.00286767	0.215401	0.197482	TRPM5/ACTN2/SLC1A3/CAB39/KCNJ16/SLC24A2/KCNQ3/KEL	8
BP	GO:0002686	negative regulation of leukocyte migration	4/221	48/17913	0.00286852	0.215401	0.197482	HMOX1/RIPOR2/PADI2/GREM1	4
BP	GO:0030042	actin filament depolymerization	4/221	48/17913	0.00286852	0.215401	0.197482	SPTB/ACTN2/SH3BP1/PLEKHH2	4
BP	GO:0048546	digestive tract morphogenesis	4/221	48/17913	0.00286852	0.215401	0.197482	ID2/NKX2-3/HOXD13/NODAL	4
BP	GO:0045652	regulation of megakaryocyte differentiation	5/221	79/17913	0.00293697	0.215401	0.197482	AGO1/HIST1H3F/HIST1H3C/HIST1H4A/HIST1H4B	5
BP	GO:0060563	neuroepithelial cell differentiation	4/221	49/17913	0.00309373	0.216116	0.198137	FGF8/RIPOR2/NODAL/DLL1	4
BP	GO:0006342	chromatin silencing	5/221	83/17913	0.00363675	0.216116	0.198137	TET1/HIST1H3F/HIST1H3C/HIST1H4A/HIST1H4B	5
BP	GO:0009855	determination of bilateral symmetry	6/221	123/17913	0.00423062	0.216116	0.198137	WNT8B/FGF8/TBX2/NODAL/GREM1/DLL1	6
BP	GO:0009799	specification of symmetry	6/221	124/17913	0.00440104	0.216116	0.198137	WNT8B/FGF8/TBX2/NODAL/GREM1/DLL1	6
BP	GO:0009101	glycoprotein biosynthetic process	10/221	302/17913	0.00440329	0.216116	0.198137	MFNG/FKTN/HS3ST3B1/CCR7/TET1/GALNT13/MUC17/ST8SIA3/BGN/TMEM106A	10
BP	GO:0072676	lymphocyte migration	5/221	87/17913	0.00444878	0.216116	0.198137	RIPOR2/PADI2/CCR7/ITGB7/CXCL11	5
BP	GO:0008154	actin polymerization or depolymerization	7/221	170/17913	0.00522356	0.216116	0.198137	SPTB/PAK3/ACTN2/SH3BP1/CCR7/PLEKHH2/CDC42EP5	7
BP	GO:0042113	B cell activation	8/221	215/17913	0.00532224	0.216116	0.198137	CD74/MFNG/SLA2/ID2/NKX2-3/PRKCB/C17orf99/DLL1	8
BP	GO:0043525	positive regulation of neuron apoptotic process	4/221	57/17913	0.00534319	0.216116	0.198137	PAK3/MYB/RAPSN/NUPR1	4
BP	GO:0051146	striated muscle cell differentiation	9/221	263/17913	0.00549151	0.216116	0.198137	ACTN2/CEACAM5/RIPOR2/TRIM32/FRS2/GREM1/MAMSTR/KEL/DLL1	9
BP	GO:0006766	vitamin metabolic process	6/221	130/17913	0.00553189	0.216116	0.198137	KMO/TCN1/BCO1/ALDH1L2/MMAA/CYP4F11	6
BP	GO:0008630	intrinsic apoptotic signaling pathway in response to DNA damage	5/221	92/17913	0.00563582	0.216116	0.198137	CD74/HMOX1/TRIM32/HIPK1/NUPR1	5
BP	GO:1901214	regulation of neuron death	10/221	313/17913	0.00563703	0.216116	0.198137	PAK3/HMOX1/FGF8/KMO/MYB/EGLN3/RAPSN/NUPR1/C5AR1/CLN3	10
BP	GO:1901216	positive regulation of neuron death	5/221	93/17913	0.00589758	0.216116	0.198137	PAK3/KMO/MYB/RAPSN/NUPR1	5
BP	GO:0048565	digestive tract development	6/221	132/17913	0.0059522	0.216116	0.198137	ID2/NKX2-3/TBX2/HOXD13/PDGFC/NODAL	6
BP	GO:0001947	heart looping	4/221	59/17913	0.00604003	0.216116	0.198137	FGF8/TBX2/NODAL/DLL1	4
BP	GO:0045123	cellular extravasation	4/221	59/17913	0.00604003	0.216116	0.198137	RIPOR2/ITGB7/PTAFR/PRTN3	4
BP	GO:0048738	cardiac muscle tissue development	8/221	221/17913	0.00625554	0.216116	0.198137	ACTN2/FGF8/ID2/TNNT2/TBX2/FRS2/GREM1/DLL1	8
BP	GO:0001768	establishment of T cell polarity	2/221	10/17913	0.00638818	0.216116	0.198137	RIPOR2/CCR7	2
BP	GO:0006569	tryptophan catabolic process	2/221	10/17913	0.00638818	0.216116	0.198137	KMO/IDO2	2
BP	GO:0042436	indole-containing compound catabolic process	2/221	10/17913	0.00638818	0.216116	0.198137	KMO/IDO2	2
BP	GO:0045060	negative thymic T cell selection	2/221	10/17913	0.00638818	0.216116	0.198137	CD74/CCR7	2
BP	GO:0046218	indolalkylamine catabolic process	2/221	10/17913	0.00638818	0.216116	0.198137	KMO/IDO2	2
BP	GO:0060525	prostate glandular acinus development	2/221	10/17913	0.00638818	0.216116	0.198137	HOXD13/FRS2	2
BP	GO:0030593	neutrophil chemotaxis	4/221	60/17913	0.00641007	0.216116	0.198137	CD74/RIPOR2/CCR7/C5AR1	4
BP	GO:1990868	response to chemokine	4/221	60/17913	0.00641007	0.216116	0.198137	RIPOR2/PADI2/CCR7/CXCL11	4
BP	GO:1990869	cellular response to chemokine	4/221	60/17913	0.00641007	0.216116	0.198137	RIPOR2/PADI2/CCR7/CXCL11	4
BP	GO:0045648	positive regulation of erythrocyte differentiation	3/221	31/17913	0.00645529	0.216116	0.198137	ID2/ACVR1B/ISG15	3
BP	GO:1901380	negative regulation of potassium ion transmembrane transport	3/221	31/17913	0.00645529	0.216116	0.198137	ACTN2/CAB39/KEL	3
BP	GO:0015672	monovalent inorganic cation transport	13/221	477/17913	0.00646002	0.216116	0.198137	TRPM5/ACTN2/SLC1A3/SLC8A2/CAB39/SCN3A/KCNJ16/SLC24A2/C15orf48/ATP6V0E2/KCNQ3/KEL/ATP6AP1L	13
BP	GO:0006334	nucleosome assembly	6/221	135/17913	0.00662568	0.216116	0.198137	TSPYL6/HIST1H1B/HIST1H3F/HIST1H3C/HIST1H4A/HIST1H4B	6
BP	GO:0006333	chromatin assembly or disassembly	7/221	178/17913	0.00667777	0.216116	0.198137	PADI2/TSPYL6/HIST1H1B/HIST1H3F/HIST1H3C/HIST1H4A/HIST1H4B	7
BP	GO:0030219	megakaryocyte differentiation	5/221	96/17913	0.00673414	0.216116	0.198137	AGO1/HIST1H3F/HIST1H3C/HIST1H4A/HIST1H4B	5
BP	GO:0120162	positive regulation of cold-induced thermogenesis	5/221	97/17913	0.00703053	0.216116	0.198137	PRDM16/PDGFC/TSHR/BSCL2/GATM	5
BP	GO:0009954	proximal/distal pattern formation	3/221	32/17913	0.00705913	0.216116	0.198137	NODAL/GREM1/DLL1	3
BP	GO:0014706	striated muscle tissue development	11/221	376/17913	0.00718372	0.216116	0.198137	ACTN2/FGF8/RIPOR2/ID2/TNNT2/TBX2/FRS2/GREM1/NUPR1/KEL/DLL1	11
BP	GO:0048562	embryonic organ morphogenesis	9/221	276/17913	0.0074482	0.216116	0.198137	PAX2/FGF8/RIPOR2/ID2/TBX2/NODAL/HIPK1/FRS2/DLL1	9
BP	GO:0060968	regulation of gene silencing	6/221	139/17913	0.00760758	0.216116	0.198137	AGO1/TET1/HIST1H3F/HIST1H3C/HIST1H4A/HIST1H4B	6
BP	GO:0010092	specification of animal organ identity	3/221	33/17913	0.00769536	0.216116	0.198137	PAX2/FGF8/FRS2	3
BP	GO:0031128	developmental induction	3/221	33/17913	0.00769536	0.216116	0.198137	FGF8/HIPK1/FRS2	3
BP	GO:0048147	negative regulation of fibroblast proliferation	3/221	33/17913	0.00769536	0.216116	0.198137	TRIM32/NUPR1/DACH1	3
BP	GO:0007159	leukocyte cell-cell adhesion	10/221	328/17913	0.00773741	0.216116	0.198137	CD74/PAK3/RIPOR2/MYB/CD70/CCR7/LRRC32/ITGB7/PTAFR/DPP4	10
BP	GO:0001767	establishment of lymphocyte polarity	2/221	11/17913	0.00774463	0.216116	0.198137	RIPOR2/CCR7	2
BP	GO:0002604	regulation of dendritic cell antigen processing and presentation	2/221	11/17913	0.00774463	0.216116	0.198137	CD74/CCR7	2
BP	GO:0019532	oxalate transport	2/221	11/17913	0.00774463	0.216116	0.198137	AGXT/SLC26A9	2
BP	GO:0031274	positive regulation of pseudopodium assembly	2/221	11/17913	0.00774463	0.216116	0.198137	CCR7/CDC42EP5	2
BP	GO:0043383	negative T cell selection	2/221	11/17913	0.00774463	0.216116	0.198137	CD74/CCR7	2
BP	GO:0048505	regulation of timing of cell differentiation	2/221	11/17913	0.00774463	0.216116	0.198137	NODAL/DLL1	2
BP	GO:0051574	positive regulation of histone H3-K9 methylation	2/221	11/17913	0.00774463	0.216116	0.198137	MYB/HIST1H1B	2
BP	GO:0060379	cardiac muscle cell myoblast differentiation	2/221	11/17913	0.00774463	0.216116	0.198137	TBX2/GREM1	2
BP	GO:0070189	kynurenine metabolic process	2/221	11/17913	0.00774463	0.216116	0.198137	KMO/IDO2	2
BP	GO:0072672	neutrophil extravasation	2/221	11/17913	0.00774463	0.216116	0.198137	RIPOR2/PRTN3	2
BP	GO:0071804	cellular potassium ion transport	6/221	140/17913	0.00786862	0.216116	0.198137	TRPM5/ACTN2/SLC1A3/CAB39/KCNQ3/KEL	6
BP	GO:0071805	potassium ion transmembrane transport	6/221	140/17913	0.00786862	0.216116	0.198137	TRPM5/ACTN2/SLC1A3/CAB39/KCNQ3/KEL	6
BP	GO:0046545	development of primary female sexual characteristics	5/221	100/17913	0.00797426	0.216116	0.198137	ADCYAP1R1/PCYT1B/ACVR1B/NUPR1/DACH1	5
BP	GO:0097530	granulocyte migration	5/221	100/17913	0.00797426	0.216116	0.198137	CD74/RIPOR2/CCR7/PRTN3/C5AR1	5
BP	GO:0061371	determination of heart left/right asymmetry	4/221	64/17913	0.00804003	0.216116	0.198137	FGF8/TBX2/NODAL/DLL1	4
BP	GO:0051147	regulation of muscle cell differentiation	7/221	185/17913	0.00818031	0.216116	0.198137	CEACAM5/RIPOR2/TRIM32/FRS2/GREM1/MAMSTR/DLL1	7
BP	GO:0002694	regulation of leukocyte activation	13/221	492/17913	0.00827148	0.216116	0.198137	CD74/PAK3/HMOX1/SLA2/RIPOR2/ID2/MYB/CD70/CCR7/LRRC32/PTAFR/C5AR1/DPP4	13
BP	GO:0045814	negative regulation of gene expression, epigenetic	5/221	101/17913	0.00830746	0.216116	0.198137	TET1/HIST1H3F/HIST1H3C/HIST1H4A/HIST1H4B	5
BP	GO:0055024	regulation of cardiac muscle tissue development	5/221	101/17913	0.00830746	0.216116	0.198137	FGF8/TBX2/FRS2/GREM1/DLL1	5
BP	GO:0070374	positive regulation of ERK1 and ERK2 cascade	7/221	186/17913	0.00841373	0.216116	0.198137	CD74/FGF8/CCR7/NODAL/FGF19/C5AR1/ARHGAP8	7
BP	GO:0003143	embryonic heart tube morphogenesis	4/221	65/17913	0.00848614	0.216116	0.198137	FGF8/TBX2/NODAL/DLL1	4
BP	GO:0055123	digestive system development	6/221	143/17913	0.00869042	0.216116	0.198137	ID2/NKX2-3/TBX2/HOXD13/PDGFC/NODAL	6
BP	GO:0106106	cold-induced thermogenesis	6/221	143/17913	0.00869042	0.216116	0.198137	NOVA2/PRDM16/PDGFC/TSHR/BSCL2/GATM	6
BP	GO:0120161	regulation of cold-induced thermogenesis	6/221	143/17913	0.00869042	0.216116	0.198137	NOVA2/PRDM16/PDGFC/TSHR/BSCL2/GATM	6
BP	GO:0030595	leukocyte chemotaxis	7/221	188/17913	0.00889525	0.216116	0.198137	CD74/RIPOR2/PADI2/CCR7/GREM1/CXCL11/C5AR1	7
BP	GO:0090066	regulation of anatomical structure size	12/221	442/17913	0.0089847	0.216116	0.198137	SPTB/PAX2/PAK3/ACTN2/SH3BP1/HMOX1/CCR7/PLEKHH2/DEPTOR/CDC42EP5/PTAFR/KEL	12
BP	GO:0003203	endocardial cushion morphogenesis	3/221	35/17913	0.00906656	0.216116	0.198137	FGF8/TBX2/MDM4	3
BP	GO:0110111	negative regulation of animal organ morphogenesis	3/221	35/17913	0.00906656	0.216116	0.198137	PAX2/TBX2/GREM1	3
BP	GO:0022407	regulation of cell-cell adhesion	11/221	389/17913	0.00914298	0.216116	0.198137	CD74/PAK3/RIPOR2/MYB/CD70/CCR7/LRRC32/NODAL/PTAFR/DPP4/CDSN	11
BP	GO:0002468	dendritic cell antigen processing and presentation	2/221	12/17913	0.00921848	0.216116	0.198137	CD74/CCR7	2
BP	GO:0006568	tryptophan metabolic process	2/221	12/17913	0.00921848	0.216116	0.198137	KMO/IDO2	2
BP	GO:0007171	activation of transmembrane receptor protein tyrosine kinase activity	2/221	12/17913	0.00921848	0.216116	0.198137	PDGFC/GREM1	2
BP	GO:0031272	regulation of pseudopodium assembly	2/221	12/17913	0.00921848	0.216116	0.198137	CCR7/CDC42EP5	2
BP	GO:0040034	regulation of development, heterochronic	2/221	12/17913	0.00921848	0.216116	0.198137	NODAL/DLL1	2
BP	GO:0043650	dicarboxylic acid biosynthetic process	2/221	12/17913	0.00921848	0.216116	0.198137	SLC1A3/KMO	2
BP	GO:0045605	negative regulation of epidermal cell differentiation	2/221	12/17913	0.00921848	0.216116	0.198137	DLL1/CDSN	2
BP	GO:0060442	branching involved in prostate gland morphogenesis	2/221	12/17913	0.00921848	0.216116	0.198137	HOXD13/FRS2	2
BP	GO:0060788	ectodermal placode formation	2/221	12/17913	0.00921848	0.216116	0.198137	TBX2/FRS2	2
BP	GO:0060900	embryonic camera-type eye formation	2/221	12/17913	0.00921848	0.216116	0.198137	PAX2/FRS2	2
BP	GO:0061450	trophoblast cell migration	2/221	12/17913	0.00921848	0.216116	0.198137	ACVR1B/NODAL	2
BP	GO:0071697	ectodermal placode morphogenesis	2/221	12/17913	0.00921848	0.216116	0.198137	TBX2/FRS2	2
BP	GO:1901160	primary amino compound metabolic process	2/221	12/17913	0.00921848	0.216116	0.198137	DDC/AZIN2	2
BP	GO:1901163	regulation of trophoblast cell migration	2/221	12/17913	0.00921848	0.216116	0.198137	ACVR1B/NODAL	2
BP	GO:2000009	negative regulation of protein localization to cell surface	2/221	12/17913	0.00921848	0.216116	0.198137	ACTN2/LEPROT	2
BP	GO:0042133	neurotransmitter metabolic process	6/221	145/17913	0.00927137	0.216116	0.198137	SLC1A3/DDC/SDSL/AGXT/TMEM106A/CLN3	6
BP	GO:0048592	eye morphogenesis	6/221	145/17913	0.00927137	0.216116	0.198137	PAX2/TBX2/HIPK1/FRS2/LCTL/DLL1	6
BP	GO:0060537	muscle tissue development	11/221	392/17913	0.00964889	0.223186	0.204619	ACTN2/FGF8/RIPOR2/ID2/TNNT2/TBX2/FRS2/GREM1/NUPR1/KEL/DLL1	11
BP	GO:0006493	protein O-linked glycosylation	5/221	106/17913	0.0101191	0.232275	0.212951	MFNG/FKTN/TET1/GALNT13/MUC17	5
BP	GO:0002683	negative regulation of immune system process	12/221	451/17913	0.0104304	0.235475	0.215886	CD74/HMOX1/SLA2/RIPOR2/ID2/PADI2/LRRC32/GREM1/DLL1/PVRIG/HIST1H4A/HIST1H4B	12
BP	GO:0051155	positive regulation of striated muscle cell differentiation	4/221	69/17913	0.0104317	0.235475	0.215886	RIPOR2/TRIM32/GREM1/MAMSTR	4
BP	GO:0051567	histone H3-K9 methylation	3/221	37/17913	0.0105716	0.235475	0.215886	MYB/PRDM16/HIST1H1B	3
BP	GO:0003337	mesenchymal to epithelial transition involved in metanephros morphogenesis	2/221	13/17913	0.0108066	0.235475	0.215886	PAX2/GREM1	2
BP	GO:0021692	cerebellar Purkinje cell layer morphogenesis	2/221	13/17913	0.0108066	0.235475	0.215886	LHX5/DLL1	2
BP	GO:0038092	nodal signaling pathway	2/221	13/17913	0.0108066	0.235475	0.215886	ACVR1B/NODAL	2
BP	GO:0071696	ectodermal placode development	2/221	13/17913	0.0108066	0.235475	0.215886	TBX2/FRS2	2
BP	GO:0070997	neuron death	10/221	347/17913	0.0112116	0.238975	0.219094	PAK3/HMOX1/FGF8/KMO/MYB/EGLN3/RAPSN/NUPR1/C5AR1/CLN3	10
BP	GO:1903037	regulation of leukocyte cell-cell adhesion	9/221	295/17913	0.0112157	0.238975	0.219094	CD74/PAK3/RIPOR2/MYB/CD70/CCR7/LRRC32/PTAFR/DPP4	9
BP	GO:0001825	blastocyst formation	3/221	38/17913	0.0113751	0.238975	0.219094	MFNG/TET1/NODAL	3
BP	GO:0043267	negative regulation of potassium ion transport	3/221	38/17913	0.0113751	0.238975	0.219094	ACTN2/CAB39/KEL	3
BP	GO:0002312	B cell activation involved in immune response	4/221	71/17913	0.0115041	0.238975	0.219094	MFNG/NKX2-3/C17orf99/DLL1	4
BP	GO:1901879	regulation of protein depolymerization	4/221	71/17913	0.0115041	0.238975	0.219094	SPTB/ACTN2/SH3BP1/PLEKHH2	4
BP	GO:1990845	adaptive thermogenesis	6/221	152/17913	0.0115236	0.238975	0.219094	NOVA2/PRDM16/PDGFC/TSHR/BSCL2/GATM	6
BP	GO:0002699	positive regulation of immune effector process	7/221	198/17913	0.0116111	0.239142	0.219247	CD74/HMOX1/MYB/KLK7/PTAFR/C17orf99/NCR3	7
BP	GO:0007517	muscle organ development	11/221	403/17913	0.0116909	0.239147	0.219252	FKTN/FGF8/RIPOR2/TNNT2/TBX2/FRS2/GREM1/NUPR1/HIST1H1B/KEL/DLL1	11
BP	GO:0031497	chromatin assembly	6/221	153/17913	0.0118742	0.239528	0.219601	TSPYL6/HIST1H1B/HIST1H3F/HIST1H3C/HIST1H4A/HIST1H4B	6
BP	GO:0031062	positive regulation of histone methylation	3/221	39/17913	0.0122129	0.239528	0.219601	MYB/TET1/HIST1H1B	3
BP	GO:1901605	alpha-amino acid metabolic process	7/221	200/17913	0.0122192	0.239528	0.219601	SLC1A3/KMO/EGLN3/SDSL/GATM/AGXT/IDO2	7
BP	GO:0006684	sphingomyelin metabolic process	2/221	14/17913	0.0125061	0.239528	0.219601	ENPP7/CLN3	2
BP	GO:0007035	vacuolar acidification	2/221	14/17913	0.0125061	0.239528	0.219601	ATP6V0E2/CLN3	2
BP	GO:0007501	mesodermal cell fate specification	2/221	14/17913	0.0125061	0.239528	0.219601	PAX2/NODAL	2
BP	GO:0009109	coenzyme catabolic process	2/221	14/17913	0.0125061	0.239528	0.219601	ALDH1L2/CYP4F11	2
BP	GO:0031269	pseudopodium assembly	2/221	14/17913	0.0125061	0.239528	0.219601	CCR7/CDC42EP5	2
BP	GO:0060732	positive regulation of inositol phosphate biosynthetic process	2/221	14/17913	0.0125061	0.239528	0.219601	ADCYAP1R1/PTAFR	2
BP	GO:1901213	regulation of transcription from RNA polymerase II promoter involved in heart development	2/221	14/17913	0.0125061	0.239528	0.219601	TBX2/GREM1	2
BP	GO:0090596	sensory organ morphogenesis	8/221	250/17913	0.0126148	0.24008	0.220108	PAX2/FGF8/RIPOR2/TBX2/HIPK1/FRS2/LCTL/DLL1	8
BP	GO:0007389	pattern specification process	11/221	408/17913	0.0127217	0.240592	0.220577	WNT8B/PAX2/MFNG/FGF8/TBX2/HOXD13/NODAL/HIPK1/FRS2/GREM1/DLL1	11
BP	GO:0022409	positive regulation of cell-cell adhesion	8/221	251/17913	0.0128963	0.241402	0.221319	CD74/PAK3/MYB/CD70/CCR7/NODAL/PTAFR/DPP4	8
BP	GO:0003279	cardiac septum development	5/221	113/17913	0.0130856	0.241402	0.221319	FGF8/ID2/TBX2/FRS2/MDM4	5
BP	GO:0030183	B cell differentiation	5/221	113/17913	0.0130856	0.241402	0.221319	MFNG/ID2/NKX2-3/C17orf99/DLL1	5
BP	GO:0060964	regulation of gene silencing by miRNA	5/221	113/17913	0.0130856	0.241402	0.221319	AGO1/HIST1H3F/HIST1H3C/HIST1H4A/HIST1H4B	5
BP	GO:0045766	positive regulation of angiogenesis	7/221	203/17913	0.0131739	0.241548	0.221453	HMOX1/NODAL/HIPK1/PRKCB/GREM1/C5AR1/DLL1	7
BP	GO:0046660	female sex differentiation	5/221	114/17913	0.0135525	0.245954	0.225492	ADCYAP1R1/PCYT1B/ACVR1B/NUPR1/DACH1	5
BP	GO:1903706	regulation of hemopoiesis	12/221	468/17913	0.0136471	0.245954	0.225492	CD74/AGO1/ID2/MYB/ACVR1B/PRKCB/ISG15/DLL1/HIST1H3F/HIST1H3C/HIST1H4A/HIST1H4B	12
BP	GO:0035050	embryonic heart tube development	4/221	75/17913	0.0138555	0.245954	0.225492	FGF8/TBX2/NODAL/DLL1	4
BP	GO:0042692	muscle cell differentiation	10/221	359/17913	0.0139479	0.245954	0.225492	ACTN2/CEACAM5/RIPOR2/TRIM32/TBX2/FRS2/GREM1/MAMSTR/KEL/DLL1	10
BP	GO:0001709	cell fate determination	3/221	41/17913	0.0139921	0.245954	0.225492	PAX2/TBX2/DLL1	3
BP	GO:0002693	positive regulation of cellular extravasation	2/221	15/17913	0.0143139	0.245954	0.225492	RIPOR2/PTAFR	2
BP	GO:0015671	oxygen transport	2/221	15/17913	0.0143139	0.245954	0.225492	HBA2/HBA1	2
BP	GO:0031268	pseudopodium organization	2/221	15/17913	0.0143139	0.245954	0.225492	CCR7/CDC42EP5	2
BP	GO:0042074	cell migration involved in gastrulation	2/221	15/17913	0.0143139	0.245954	0.225492	FGF8/NODAL	2
BP	GO:0051923	sulfation	2/221	15/17913	0.0143139	0.245954	0.225492	HS3ST3B1/CHST5	2
BP	GO:2000402	negative regulation of lymphocyte migration	2/221	15/17913	0.0143139	0.245954	0.225492	RIPOR2/PADI2	2
BP	GO:0022612	gland morphogenesis	5/221	116/17913	0.0145196	0.248071	0.227433	FGF8/NKX2-3/TBX2/HOXD13/FRS2	5
BP	GO:0010863	positive regulation of phospholipase C activity	3/221	42/17913	0.014934	0.250919	0.230045	ADCYAP1R1/PTAFR/C5AR1	3
BP	GO:0015701	bicarbonate transport	3/221	42/17913	0.014934	0.250919	0.230045	SLC26A9/HBA2/HBA1	3
BP	GO:0060147	regulation of posttranscriptional gene silencing	5/221	117/17913	0.0150201	0.250919	0.230045	AGO1/HIST1H3F/HIST1H3C/HIST1H4A/HIST1H4B	5
BP	GO:0060966	regulation of gene silencing by RNA	5/221	117/17913	0.0150201	0.250919	0.230045	AGO1/HIST1H3F/HIST1H3C/HIST1H4A/HIST1H4B	5
BP	GO:0002695	negative regulation of leukocyte activation	6/221	163/17913	0.0158032	0.259548	0.237955	CD74/HMOX1/SLA2/RIPOR2/ID2/LRRC32	6
BP	GO:0042771	intrinsic apoptotic signaling pathway in response to DNA damage by p53 class mediator	3/221	43/17913	0.0159109	0.259548	0.237955	CD74/HIPK1/NUPR1	3
BP	GO:0051154	negative regulation of striated muscle cell differentiation	3/221	43/17913	0.0159109	0.259548	0.237955	CEACAM5/FRS2/DLL1	3
BP	GO:0055026	negative regulation of cardiac muscle tissue development	3/221	43/17913	0.0159109	0.259548	0.237955	FGF8/FRS2/DLL1	3
BP	GO:0007567	parturition	2/221	16/17913	0.0162271	0.259548	0.237955	NODAL/PTAFR	2
BP	GO:0010919	regulation of inositol phosphate biosynthetic process	2/221	16/17913	0.0162271	0.259548	0.237955	ADCYAP1R1/PTAFR	2
BP	GO:0045683	negative regulation of epidermis development	2/221	16/17913	0.0162271	0.259548	0.237955	DLL1/CDSN	2
BP	GO:0072283	metanephric renal vesicle morphogenesis	2/221	16/17913	0.0162271	0.259548	0.237955	PAX2/GREM1	2
BP	GO:0032535	regulation of cellular component size	9/221	315/17913	0.0165652	0.261162	0.239435	SPTB/PAK3/ACTN2/SH3BP1/CCR7/PLEKHH2/DEPTOR/CDC42EP5/KEL	9
BP	GO:0009100	glycoprotein metabolic process	10/221	369/17913	0.0165876	0.261162	0.239435	MFNG/FKTN/HS3ST3B1/CCR7/TET1/GALNT13/MUC17/ST8SIA3/BGN/TMEM106A	10
BP	GO:0034728	nucleosome organization	6/221	165/17913	0.0166851	0.261162	0.239435	TSPYL6/HIST1H1B/HIST1H3F/HIST1H3C/HIST1H4A/HIST1H4B	6
BP	GO:0097191	extrinsic apoptotic signaling pathway	7/221	213/17913	0.0167436	0.261162	0.239435	HMOX1/CD70/IFI6/ACVR1B/DEPTOR/HIPK1/IFI27	7
BP	GO:0060393	regulation of pathway-restricted SMAD protein phosphorylation	3/221	44/17913	0.016923	0.261162	0.239435	ACVR1B/NODAL/GREM1	3
BP	GO:1900274	regulation of phospholipase C activity	3/221	44/17913	0.016923	0.261162	0.239435	ADCYAP1R1/PTAFR/C5AR1	3
BP	GO:1903039	positive regulation of leukocyte cell-cell adhesion	7/221	214/17913	0.0171347	0.261162	0.239435	CD74/PAK3/MYB/CD70/CCR7/PTAFR/DPP4	7
BP	GO:0002687	positive regulation of leukocyte migration	5/221	121/17913	0.0171374	0.261162	0.239435	CD74/RIPOR2/CCR7/PTAFR/C5AR1	5
BP	GO:0051262	protein tetramerization	6/221	166/17913	0.0171386	0.261162	0.239435	CD74/ACTN2/HIST1H3F/HIST1H3C/HIST1H4A/HIST1H4B	6
BP	GO:0110110	positive regulation of animal organ morphogenesis	4/221	80/17913	0.0171965	0.261162	0.239435	PAX2/FGF8/FRS2/GREM1	4
BP	GO:0003002	regionalization	9/221	318/17913	0.0175056	0.263196	0.241301	WNT8B/PAX2/FGF8/HOXD13/NODAL/HIPK1/FRS2/GREM1/DLL1	9
BP	GO:0072330	monocarboxylic acid biosynthetic process	9/221	318/17913	0.0175056	0.263196	0.241301	CD74/SLC1A3/KMO/CYP39A1/FGF19/PGAM2/AGXT/NUPR1/BGN	9
BP	GO:0002690	positive regulation of leukocyte chemotaxis	4/221	81/17913	0.0179198	0.266294	0.24414	CD74/RIPOR2/CCR7/C5AR1	4
BP	GO:0003197	endocardial cushion development	3/221	45/17913	0.0179703	0.266294	0.24414	FGF8/TBX2/MDM4	3
BP	GO:0006544	glycine metabolic process	2/221	17/17913	0.0182429	0.266294	0.24414	SDSL/AGXT	2
BP	GO:0042953	lipoprotein transport	2/221	17/17913	0.0182429	0.266294	0.24414	APOB/PRKCB	2
BP	GO:0044872	lipoprotein localization	2/221	17/17913	0.0182429	0.266294	0.24414	APOB/PRKCB	2
BP	GO:0048532	anatomical structure arrangement	2/221	17/17913	0.0182429	0.266294	0.24414	PAX2/DLL1	2
BP	GO:0006970	response to osmotic stress	4/221	82/17913	0.0186618	0.268977	0.246601	KMO/CAB39/TACR3/SLC2A4	4
BP	GO:0045445	myoblast differentiation	4/221	82/17913	0.0186618	0.268977	0.246601	RIPOR2/TBX2/GREM1/DLL1	4
BP	GO:0007548	sex differentiation	8/221	269/17913	0.0187873	0.268977	0.246601	ADCYAP1R1/PCYT1B/FGF8/HOXD13/HSD17B3/ACVR1B/NUPR1/DACH1	8
BP	GO:0003205	cardiac chamber development	6/221	170/17913	0.0190373	0.268977	0.246601	FGF8/ID2/TNNT2/TBX2/FRS2/MDM4	6
BP	GO:0097529	myeloid leukocyte migration	6/221	170/17913	0.0190373	0.268977	0.246601	CD74/RIPOR2/CCR7/GREM1/PRTN3/C5AR1	6
BP	GO:0030857	negative regulation of epithelial cell differentiation	3/221	46/17913	0.0190529	0.268977	0.246601	NODAL/DLL1/CDSN	3
BP	GO:0048806	genitalia development	3/221	46/17913	0.0190529	0.268977	0.246601	FGF8/HOXD13/HSD17B3	3
BP	GO:0009615	response to virus	9/221	323/17913	0.0191588	0.269207	0.246811	APOB/CCL22/IFI6/OASL/RTP4/IFI44L/IFI27/IFNE/ISG15	9
BP	GO:0070372	regulation of ERK1 and ERK2 cascade	8/221	271/17913	0.0195437	0.273295	0.250559	CD74/FGF8/CCR7/NODAL/FGF19/FRS2/C5AR1/ARHGAP8	8
BP	GO:0030098	lymphocyte differentiation	9/221	325/17913	0.0198508	0.273295	0.250559	CD74/MFNG/ID2/MYB/NKX2-3/CCR7/HNF1A/C17orf99/DLL1	9
BP	GO:0001659	temperature homeostasis	6/221	172/17913	0.0200385	0.273295	0.250559	NOVA2/PRDM16/PDGFC/TSHR/BSCL2/GATM	6
BP	GO:0043123	positive regulation of I-kappaB kinase/NF-kappaB signaling	6/221	172/17913	0.0200385	0.273295	0.250559	CD74/HMOX1/TRIM32/CCR7/PRKCB/TMEM106A	6
BP	GO:0006576	cellular biogenic amine metabolic process	3/221	47/17913	0.020171	0.273295	0.250559	KMO/DDC/IDO2	3
BP	GO:0045646	regulation of erythrocyte differentiation	3/221	47/17913	0.020171	0.273295	0.250559	ID2/ACVR1B/ISG15	3
BP	GO:0006767	water-soluble vitamin metabolic process	4/221	84/17913	0.0202022	0.273295	0.250559	KMO/TCN1/ALDH1L2/MMAA	4
BP	GO:0071621	granulocyte chemotaxis	4/221	84/17913	0.0202022	0.273295	0.250559	CD74/RIPOR2/CCR7/C5AR1	4
BP	GO:0001779	natural killer cell differentiation	2/221	18/17913	0.0203585	0.273295	0.250559	ID2/HNF1A	2
BP	GO:0045653	negative regulation of megakaryocyte differentiation	2/221	18/17913	0.0203585	0.273295	0.250559	HIST1H4A/HIST1H4B	2
BP	GO:0070542	response to fatty acid	4/221	85/17913	0.0210009	0.280666	0.257317	GIPR/APOB/CCR7/PTAFR	4
BP	GO:0060389	pathway-restricted SMAD protein phosphorylation	3/221	48/17913	0.0213245	0.282479	0.258979	ACVR1B/NODAL/GREM1	3
BP	GO:0061647	histone H3-K9 modification	3/221	48/17913	0.0213245	0.282479	0.258979	MYB/PRDM16/HIST1H1B	3
BP	GO:0001710	mesodermal cell fate commitment	2/221	19/17913	0.0225711	0.28759	0.263665	PAX2/NODAL	2
BP	GO:0002577	regulation of antigen processing and presentation	2/221	19/17913	0.0225711	0.28759	0.263665	CD74/CCR7	2
BP	GO:0002689	negative regulation of leukocyte chemotaxis	2/221	19/17913	0.0225711	0.28759	0.263665	PADI2/GREM1	2
BP	GO:0002922	positive regulation of humoral immune response	2/221	19/17913	0.0225711	0.28759	0.263665	CCR7/KLK7	2
BP	GO:0015669	gas transport	2/221	19/17913	0.0225711	0.28759	0.263665	HBA2/HBA1	2
BP	GO:0045061	thymic T cell selection	2/221	19/17913	0.0225711	0.28759	0.263665	CD74/CCR7	2
BP	GO:0072077	renal vesicle morphogenesis	2/221	19/17913	0.0225711	0.28759	0.263665	PAX2/GREM1	2
BP	GO:0072079	nephron tubule formation	2/221	19/17913	0.0225711	0.28759	0.263665	PAX2/GREM1	2
BP	GO:0090190	positive regulation of branching involved in ureteric bud morphogenesis	2/221	19/17913	0.0225711	0.28759	0.263665	PAX2/GREM1	2
BP	GO:0110053	regulation of actin filament organization	7/221	228/17913	0.0233066	0.295709	0.271108	SPTB/PAK3/ACTN2/SH3BP1/CCR7/PLEKHH2/CDC42EP5	7
BP	GO:2000725	regulation of cardiac muscle cell differentiation	3/221	50/17913	0.0237379	0.299741	0.274805	FRS2/GREM1/DLL1	3
BP	GO:0007219	Notch signaling pathway	6/221	179/17913	0.0238238	0.299741	0.274805	MFNG/TBX2/CHAC1/PGAM2/AGXT/DLL1	6
BP	GO:0051250	negative regulation of lymphocyte activation	5/221	132/17913	0.0239531	0.300112	0.275145	CD74/SLA2/RIPOR2/ID2/LRRC32	5
BP	GO:0051607	defense response to virus	7/221	231/17913	0.0248056	0.301881	0.276767	IFI6/OASL/RTP4/IFI44L/IFI27/IFNE/ISG15	7
BP	GO:0010002	cardioblast differentiation	2/221	20/17913	0.0248781	0.301881	0.276767	TBX2/GREM1	2
BP	GO:0021697	cerebellar cortex formation	2/221	20/17913	0.0248781	0.301881	0.276767	LHX5/DLL1	2
BP	GO:0060231	mesenchymal to epithelial transition	2/221	20/17913	0.0248781	0.301881	0.276767	PAX2/GREM1	2
BP	GO:0072087	renal vesicle development	2/221	20/17913	0.0248781	0.301881	0.276767	PAX2/GREM1	2
BP	GO:0048146	positive regulation of fibroblast proliferation	3/221	51/17913	0.0249978	0.301881	0.276767	CD74/MYB/PDGFC	3
BP	GO:0070098	chemokine-mediated signaling pathway	3/221	51/17913	0.0249978	0.301881	0.276767	PADI2/CCR7/CXCL11	3
BP	GO:0072132	mesenchyme morphogenesis	3/221	51/17913	0.0249978	0.301881	0.276767	FGF8/TBX2/MDM4	3
BP	GO:1901607	alpha-amino acid biosynthetic process	3/221	51/17913	0.0249978	0.301881	0.276767	SLC1A3/GATM/AGXT	3
BP	GO:0045639	positive regulation of myeloid cell differentiation	4/221	90/17913	0.0252837	0.303331	0.278096	CD74/ID2/ACVR1B/ISG15	4
BP	GO:1904018	positive regulation of vasculature development	7/221	232/17913	0.0253196	0.303331	0.278096	HMOX1/NODAL/HIPK1/PRKCB/GREM1/C5AR1/DLL1	7
BP	GO:0009952	anterior/posterior pattern specification	6/221	182/17913	0.0255834	0.305275	0.279878	FGF8/HOXD13/NODAL/HIPK1/FRS2/DLL1	6
BP	GO:0098742	cell-cell adhesion via plasma-membrane adhesion molecules	7/221	233/17913	0.0258409	0.305346	0.279944	PCDHA6/CEACAM5/PCDH1/CDH16/CDHR4/PCDHGA9/PCDHGA4	7
BP	GO:0032970	regulation of actin filament-based process	9/221	341/17913	0.0260525	0.305346	0.279944	SPTB/PAK3/ACTN2/SH3BP1/TNNT2/CCR7/EPHA5/PLEKHH2/CDC42EP5	9
BP	GO:2000241	regulation of reproductive process	5/221	135/17913	0.0260755	0.305346	0.279944	HOXD13/ACVR1B/NODAL/PTAFR/NUPR1	5
BP	GO:0001656	metanephros development	4/221	91/17913	0.0261987	0.305346	0.279944	PAX2/FGF8/ID2/GREM1	4
BP	GO:0060337	type I interferon signaling pathway	4/221	91/17913	0.0261987	0.305346	0.279944	IFI6/OASL/IFI27/ISG15	4
BP	GO:0071357	cellular response to type I interferon	4/221	91/17913	0.0261987	0.305346	0.279944	IFI6/OASL/IFI27/ISG15	4
BP	GO:0002089	lens morphogenesis in camera-type eye	2/221	21/17913	0.0272767	0.315157	0.288939	HIPK1/LCTL	2
BP	GO:0042402	cellular biogenic amine catabolic process	2/221	21/17913	0.0272767	0.315157	0.288939	KMO/IDO2	2
BP	GO:0070371	ERK1 and ERK2 cascade	8/221	289/17913	0.0273548	0.315157	0.288939	CD74/FGF8/CCR7/NODAL/FGF19/FRS2/C5AR1/ARHGAP8	8
BP	GO:0051249	regulation of lymphocyte activation	10/221	401/17913	0.0275361	0.316034	0.289743	CD74/PAK3/SLA2/RIPOR2/ID2/MYB/CD70/CCR7/LRRC32/DPP4	10
BP	GO:0050920	regulation of chemotaxis	6/221	186/17913	0.0280614	0.317518	0.291103	CD74/RIPOR2/PADI2/CCR7/GREM1/C5AR1	6
BP	GO:0006835	dicarboxylic acid transport	4/221	93/17913	0.0280877	0.317518	0.291103	SLC1A3/KMO/AGXT/SLC26A9	4
BP	GO:0051261	protein depolymerization	4/221	93/17913	0.0280877	0.317518	0.291103	SPTB/ACTN2/SH3BP1/PLEKHH2	4
BP	GO:0072080	nephron tubule development	4/221	93/17913	0.0280877	0.317518	0.291103	PAX2/FGF8/GREM1/DLL1	4
BP	GO:0006520	cellular amino acid metabolic process	9/221	347/17913	0.0286982	0.322072	0.295278	SLC1A3/KMO/EGLN3/DDC/SDSL/GATM/AGXT/IDO2/CLN3	9
BP	GO:0050866	negative regulation of cell activation	6/221	187/17913	0.0287048	0.322072	0.295278	CD74/HMOX1/SLA2/RIPOR2/ID2/LRRC32	6
BP	GO:0001759	organ induction	2/221	22/17913	0.0297645	0.325215	0.29816	FGF8/FRS2	2
BP	GO:0009110	vitamin biosynthetic process	2/221	22/17913	0.0297645	0.325215	0.29816	BCO1/MMAA	2
BP	GO:0009235	cobalamin metabolic process	2/221	22/17913	0.0297645	0.325215	0.29816	TCN1/MMAA	2
BP	GO:0042744	hydrogen peroxide catabolic process	2/221	22/17913	0.0297645	0.325215	0.29816	HBA2/HBA1	2
BP	GO:0043950	positive regulation of cAMP-mediated signaling	2/221	22/17913	0.0297645	0.325215	0.29816	GIPR/ADCYAP1R1	2
BP	GO:0048799	animal organ maturation	2/221	22/17913	0.0297645	0.325215	0.29816	PAX2/GREM1	2
BP	GO:0061213	positive regulation of mesonephros development	2/221	22/17913	0.0297645	0.325215	0.29816	PAX2/GREM1	2
BP	GO:0034340	response to type I interferon	4/221	95/17913	0.030056	0.325215	0.29816	IFI6/OASL/IFI27/ISG15	4
BP	GO:0061326	renal tubule development	4/221	95/17913	0.030056	0.325215	0.29816	PAX2/FGF8/GREM1/DLL1	4
BP	GO:0048872	homeostasis of number of cells	7/221	241/17913	0.0302774	0.325215	0.29816	CD74/HMOX1/ID2/NKX2-3/CCR7/ACVR1B/ISG15	7
BP	GO:1901617	organic hydroxy compound biosynthetic process	7/221	241/17913	0.0302774	0.325215	0.29816	ADCYAP1R1/APOB/HSD17B3/DDC/CYP39A1/FGF19/PTAFR	7
BP	GO:0031295	T cell costimulation	3/221	55/17913	0.0303909	0.325215	0.29816	PAK3/CCR7/DPP4	3
BP	GO:0032722	positive regulation of chemokine production	3/221	55/17913	0.0303909	0.325215	0.29816	CD74/HMOX1/TRIM32	3
BP	GO:0032956	regulation of actin cytoskeleton organization	8/221	297/17913	0.0314396	0.334167	0.306367	SPTB/PAK3/ACTN2/SH3BP1/CCR7/EPHA5/PLEKHH2/CDC42EP5	8
BP	GO:0031294	lymphocyte costimulation	3/221	56/17913	0.0318272	0.334167	0.306367	PAK3/CCR7/DPP4	3
BP	GO:0071897	DNA biosynthetic process	6/221	192/17913	0.0320676	0.334167	0.306367	PAK3/TEX12/GREM1/ISG15/PINX1/DACH1	6
BP	GO:0019933	cAMP-mediated signaling	5/221	143/17913	0.0323108	0.334167	0.306367	GIPR/ADCYAP1R1/EPHA5/TSHR/CXCL11	5
BP	GO:0009310	amine catabolic process	2/221	23/17913	0.0323388	0.334167	0.306367	KMO/IDO2	2
BP	GO:0042537	benzene-containing compound metabolic process	2/221	23/17913	0.0323388	0.334167	0.306367	KMO/IDO2	2
BP	GO:0050857	positive regulation of antigen receptor-mediated signaling pathway	2/221	23/17913	0.0323388	0.334167	0.306367	CCR7/PRKCB	2
BP	GO:0051570	regulation of histone H3-K9 methylation	2/221	23/17913	0.0323388	0.334167	0.306367	MYB/HIST1H1B	2
BP	GO:0090189	regulation of branching involved in ureteric bud morphogenesis	2/221	23/17913	0.0323388	0.334167	0.306367	PAX2/GREM1	2
BP	GO:2000726	negative regulation of cardiac muscle cell differentiation	2/221	23/17913	0.0323388	0.334167	0.306367	FRS2/DLL1	2
BP	GO:0048568	embryonic organ development	10/221	413/17913	0.0327377	0.336003	0.30805	PAX2/FGF8/RIPOR2/ID2/TBX2/PDGFC/NODAL/HIPK1/FRS2/DLL1	10
BP	GO:0042542	response to hydrogen peroxide	5/221	144/17913	0.0331501	0.336003	0.30805	PAX2/HMOX1/MYB/HBA2/HBA1	5
BP	GO:0061351	neural precursor cell proliferation	5/221	144/17913	0.0331501	0.336003	0.30805	LHX5/FGF8/ID2/FRS2/C5AR1	5
BP	GO:0043244	regulation of protein complex disassembly	4/221	98/17913	0.033158	0.336003	0.30805	SPTB/ACTN2/SH3BP1/PLEKHH2	4
BP	GO:1901606	alpha-amino acid catabolic process	4/221	98/17913	0.033158	0.336003	0.30805	KMO/SDSL/AGXT/IDO2	4
BP	GO:0010518	positive regulation of phospholipase activity	3/221	57/17913	0.0332986	0.336003	0.30805	ADCYAP1R1/PTAFR/C5AR1	3
BP	GO:0060688	regulation of morphogenesis of a branching structure	3/221	57/17913	0.0332986	0.336003	0.30805	PAX2/HOXD13/GREM1	3
BP	GO:0006323	DNA packaging	6/221	194/17913	0.0334816	0.33672	0.308708	TSPYL6/HIST1H1B/HIST1H3F/HIST1H3C/HIST1H4A/HIST1H4B	6
BP	GO:0046847	filopodium assembly	3/221	58/17913	0.0348048	0.346172	0.317374	SH3BP1/RIPOR2/CCR7	3
BP	GO:0021680	cerebellar Purkinje cell layer development	2/221	24/17913	0.0349971	0.346172	0.317374	LHX5/DLL1	2
BP	GO:0032925	regulation of activin receptor signaling pathway	2/221	24/17913	0.0349971	0.346172	0.317374	ACVR1B/NODAL	2
BP	GO:0032958	inositol phosphate biosynthetic process	2/221	24/17913	0.0349971	0.346172	0.317374	ADCYAP1R1/PTAFR	2
BP	GO:0060571	morphogenesis of an epithelial fold	2/221	24/17913	0.0349971	0.346172	0.317374	HOXD13/NODAL	2
BP	GO:0003007	heart morphogenesis	7/221	249/17913	0.0352012	0.347049	0.318178	FGF8/ID2/TNNT2/TBX2/NODAL/MDM4/DLL1	7
BP	GO:1903900	regulation of viral life cycle	5/221	147/17913	0.0357492	0.348714	0.319704	CD74/TRIM32/OASL/IFI27/ISG15	5
BP	GO:0016054	organic acid catabolic process	7/221	250/17913	0.0358518	0.348714	0.319704	KMO/ALDH1L2/SDSL/CYP39A1/MMAA/AGXT/IDO2	7
BP	GO:0046395	carboxylic acid catabolic process	7/221	250/17913	0.0358518	0.348714	0.319704	KMO/ALDH1L2/SDSL/CYP39A1/MMAA/AGXT/IDO2	7
BP	GO:0010830	regulation of myotube differentiation	3/221	59/17913	0.0363458	0.348714	0.319704	CEACAM5/RIPOR2/MAMSTR	3
BP	GO:0033013	tetrapyrrole metabolic process	3/221	59/17913	0.0363458	0.348714	0.319704	HMOX1/TCN1/MMAA	3
BP	GO:0045843	negative regulation of striated muscle tissue development	3/221	59/17913	0.0363458	0.348714	0.319704	FGF8/FRS2/DLL1	3
BP	GO:0072678	T cell migration	3/221	59/17913	0.0363458	0.348714	0.319704	RIPOR2/ITGB7/CXCL11	3
BP	GO:0050870	positive regulation of T cell activation	6/221	198/17913	0.0364296	0.348714	0.319704	CD74/PAK3/MYB/CD70/CCR7/DPP4	6
BP	GO:0048661	positive regulation of smooth muscle cell proliferation	4/221	101/17913	0.0364402	0.348714	0.319704	HMOX1/ID2/MYB/PTAFR	4
BP	GO:0008643	carbohydrate transport	5/221	148/17913	0.0366427	0.348714	0.319704	HNF1A/FGF19/PRKCB/SLC2A4/SLC35D3	5
BP	GO:0050863	regulation of T cell activation	8/221	307/17913	0.03711	0.348714	0.319704	CD74/PAK3/RIPOR2/MYB/CD70/CCR7/LRRC32/DPP4	8
BP	GO:0034764	positive regulation of transmembrane transport	6/221	199/17913	0.0371918	0.348714	0.319704	CACNG4/ACTN2/AZIN2/FGF19/CXCL11/PTAFR	6
BP	GO:0071229	cellular response to acid chemical	6/221	199/17913	0.0371918	0.348714	0.319704	WNT8B/PAX2/APOB/MYB/PDGFC/PTAFR	6
BP	GO:0016202	regulation of striated muscle tissue development	5/221	149/17913	0.0375499	0.348714	0.319704	FGF8/TBX2/FRS2/GREM1/DLL1	5
BP	GO:0001702	gastrulation with mouth forming second	2/221	25/17913	0.0377372	0.348714	0.319704	NODAL/FRS2	2
BP	GO:0015991	ATP hydrolysis coupled proton transport	2/221	25/17913	0.0377372	0.348714	0.319704	ATP6V0E2/ATP6AP1L	2
BP	GO:0050901	leukocyte tethering or rolling	2/221	25/17913	0.0377372	0.348714	0.319704	ITGB7/PTAFR	2
BP	GO:0060740	prostate gland epithelium morphogenesis	2/221	25/17913	0.0377372	0.348714	0.319704	HOXD13/FRS2	2
BP	GO:0060326	cell chemotaxis	7/221	253/17913	0.0378514	0.348714	0.319704	CD74/RIPOR2/PADI2/CCR7/GREM1/CXCL11/C5AR1	7
BP	GO:0001658	branching involved in ureteric bud morphogenesis	3/221	60/17913	0.0379213	0.348714	0.319704	PAX2/FGF8/GREM1	3
BP	GO:0009880	embryonic pattern specification	3/221	60/17913	0.0379213	0.348714	0.319704	NODAL/FRS2/DLL1	3
BP	GO:0048635	negative regulation of muscle organ development	3/221	60/17913	0.0379213	0.348714	0.319704	FGF8/FRS2/DLL1	3
BP	GO:0046394	carboxylic acid biosynthetic process	10/221	426/17913	0.0391142	0.358586	0.328755	CD74/SLC1A3/KMO/CYP39A1/FGF19/PGAM2/GATM/AGXT/NUPR1/BGN	10
BP	GO:0048645	animal organ formation	3/221	61/17913	0.0395313	0.360808	0.330792	PAX2/FGF8/FRS2	3
BP	GO:0016053	organic acid biosynthetic process	10/221	427/17913	0.0396378	0.360808	0.330792	CD74/SLC1A3/KMO/CYP39A1/FGF19/PGAM2/GATM/AGXT/NUPR1/BGN	10
BP	GO:1901861	regulation of muscle tissue development	5/221	152/17913	0.0403537	0.360808	0.330792	FGF8/TBX2/FRS2/GREM1/DLL1	5
BP	GO:1903707	negative regulation of hemopoiesis	5/221	152/17913	0.0403537	0.360808	0.330792	CD74/ID2/DLL1/HIST1H4A/HIST1H4B	5
BP	GO:0002691	regulation of cellular extravasation	2/221	26/17913	0.0405564	0.360808	0.330792	RIPOR2/PTAFR	2
BP	GO:0015988	energy coupled proton transmembrane transport, against electrochemical gradient	2/221	26/17913	0.0405564	0.360808	0.330792	ATP6V0E2/ATP6AP1L	2
BP	GO:0061217	regulation of mesonephros development	2/221	26/17913	0.0405564	0.360808	0.330792	PAX2/GREM1	2
BP	GO:0072202	cell differentiation involved in metanephros development	2/221	26/17913	0.0405564	0.360808	0.330792	PAX2/GREM1	2
BP	GO:0072273	metanephric nephron morphogenesis	2/221	26/17913	0.0405564	0.360808	0.330792	PAX2/GREM1	2
BP	GO:1901017	negative regulation of potassium ion transmembrane transporter activity	2/221	26/17913	0.0405564	0.360808	0.330792	ACTN2/CAB39	2
BP	GO:0051090	regulation of DNA-binding transcription factor activity	10/221	429/17913	0.0406995	0.361013	0.330979	HMOX1/ID2/TRIM32/MXI1/EPHA5/NODAL/PRKCB/GREM1/RHEBL1/NUPR1	10
BP	GO:1902903	regulation of supramolecular fiber organization	8/221	313/17913	0.0408239	0.361051	0.331015	SPTB/PAK3/ACTN2/SH3BP1/TUBB4A/CCR7/PLEKHH2/CDC42EP5	8
BP	GO:1901862	negative regulation of muscle tissue development	3/221	62/17913	0.0411755	0.363093	0.332887	FGF8/FRS2/DLL1	3
BP	GO:0048634	regulation of muscle organ development	5/221	153/17913	0.0413159	0.363266	0.333045	FGF8/TBX2/FRS2/GREM1/DLL1	5
BP	GO:0035051	cardiocyte differentiation	5/221	154/17913	0.0422918	0.367834	0.337234	ACTN2/TBX2/FRS2/GREM1/DLL1	5
BP	GO:0002065	columnar/cuboidal epithelial cell differentiation	4/221	106/17913	0.042313	0.367834	0.337234	FGF8/RIPOR2/NODAL/DLL1	4
BP	GO:2000278	regulation of DNA biosynthetic process	4/221	106/17913	0.042313	0.367834	0.337234	PAK3/GREM1/PINX1/DACH1	4
BP	GO:0030101	natural killer cell activation	3/221	63/17913	0.0428538	0.367834	0.337234	ID2/HNF1A/NCR3	3
BP	GO:0050854	regulation of antigen receptor-mediated signaling pathway	3/221	63/17913	0.0428538	0.367834	0.337234	CCR7/PRKCB/PVRIG	3
BP	GO:0003148	outflow tract septum morphogenesis	2/221	27/17913	0.0434525	0.367834	0.337234	FGF8/TBX2	2
BP	GO:0009651	response to salt stress	2/221	27/17913	0.0434525	0.367834	0.337234	KMO/TACR3	2
BP	GO:0021846	cell proliferation in forebrain	2/221	27/17913	0.0434525	0.367834	0.337234	LHX5/FGF8	2
BP	GO:0060512	prostate gland morphogenesis	2/221	27/17913	0.0434525	0.367834	0.337234	HOXD13/FRS2	2
BP	GO:0099131	ATP hydrolysis coupled ion transmembrane transport	2/221	27/17913	0.0434525	0.367834	0.337234	ATP6V0E2/ATP6AP1L	2
BP	GO:1905208	negative regulation of cardiocyte differentiation	2/221	27/17913	0.0434525	0.367834	0.337234	FRS2/DLL1	2
BP	GO:0006024	glycosaminoglycan biosynthetic process	4/221	107/17913	0.0435481	0.367834	0.337234	HS3ST3B1/CHST5/NDST2/BGN	4
BP	GO:0014902	myotube differentiation	4/221	107/17913	0.0435481	0.367834	0.337234	CEACAM5/RIPOR2/MAMSTR/KEL	4
BP	GO:1904659	glucose transmembrane transport	4/221	107/17913	0.0435481	0.367834	0.337234	HNF1A/FGF19/PRKCB/SLC2A4	4
BP	GO:0031060	regulation of histone methylation	3/221	64/17913	0.044566	0.373364	0.342304	MYB/TET1/HIST1H1B	3
BP	GO:0006023	aminoglycan biosynthetic process	4/221	108/17913	0.0448032	0.373364	0.342304	HS3ST3B1/CHST5/NDST2/BGN	4
BP	GO:0008543	fibroblast growth factor receptor signaling pathway	4/221	109/17913	0.0460785	0.373364	0.342304	ANOS1/FGF8/FGF19/FRS2	4
BP	GO:0018210	peptidyl-threonine modification	4/221	109/17913	0.0460785	0.373364	0.342304	ACVR1B/CAB39/GALNT13/PRKCB	4
BP	GO:0042737	drug catabolic process	4/221	109/17913	0.0460785	0.373364	0.342304	SDSL/HBA2/CYP2B6/HBA1	4
BP	GO:0072009	nephron epithelium development	4/221	109/17913	0.0460785	0.373364	0.342304	PAX2/FGF8/GREM1/DLL1	4
BP	GO:0001505	regulation of neurotransmitter levels	8/221	321/17913	0.04615	0.373364	0.342304	SLC1A3/KMO/DDC/SDSL/PRKCB/AGXT/TMEM106A/CLN3	8
BP	GO:0065004	protein-DNA complex assembly	6/221	210/17913	0.046253	0.373364	0.342304	TSPYL6/HIST1H1B/HIST1H3F/HIST1H3C/HIST1H4A/HIST1H4B	6
BP	GO:0006687	glycosphingolipid metabolic process	3/221	65/17913	0.0463118	0.373364	0.342304	ST8SIA3/ENPP7/CLN3	3
BP	GO:0071300	cellular response to retinoic acid	3/221	65/17913	0.0463118	0.373364	0.342304	WNT8B/PAX2/MYB	3
BP	GO:0002285	lymphocyte activation involved in immune response	5/221	158/17913	0.0463343	0.373364	0.342304	MFNG/MYB/NKX2-3/C17orf99/DLL1	5
BP	GO:0019827	stem cell population maintenance	5/221	158/17913	0.0463343	0.373364	0.342304	PAX2/TET1/PRDM16/NODAL/DLL1	5
BP	GO:0009074	aromatic amino acid family catabolic process	2/221	28/17913	0.0464231	0.373364	0.342304	KMO/IDO2	2
BP	GO:0048741	skeletal muscle fiber development	2/221	28/17913	0.0464231	0.373364	0.342304	RIPOR2/KEL	2
BP	GO:0050869	negative regulation of B cell activation	2/221	28/17913	0.0464231	0.373364	0.342304	SLA2/ID2	2
BP	GO:0090662	ATP hydrolysis coupled transmembrane transport	2/221	28/17913	0.0464231	0.373364	0.342304	ATP6V0E2/ATP6AP1L	2
BP	GO:1902932	positive regulation of alcohol biosynthetic process	2/221	28/17913	0.0464231	0.373364	0.342304	ADCYAP1R1/PTAFR	2
BP	GO:0048667	cell morphogenesis involved in neuron differentiation	11/221	500/17913	0.0464377	0.373364	0.342304	ANOS1/SPTB/PAX2/PAK3/SLC1A3/FGF8/RIPOR2/ID2/EPHA5/FRS2/KEL	11
BP	GO:0010517	regulation of phospholipase activity	3/221	66/17913	0.048091	0.382565	0.350739	ADCYAP1R1/PTAFR/C5AR1	3
BP	GO:0051148	negative regulation of muscle cell differentiation	3/221	66/17913	0.048091	0.382565	0.350739	CEACAM5/FRS2/DLL1	3
BP	GO:0060675	ureteric bud morphogenesis	3/221	66/17913	0.048091	0.382565	0.350739	PAX2/FGF8/GREM1	3
BP	GO:1905207	regulation of cardiocyte differentiation	3/221	66/17913	0.048091	0.382565	0.350739	FRS2/GREM1/DLL1	3
BP	GO:0098727	maintenance of cell number	5/221	160/17913	0.0484389	0.38327	0.351385	PAX2/TET1/PRDM16/NODAL/DLL1	5
BP	GO:0042110	T cell activation	10/221	443/17913	0.0486821	0.38327	0.351385	CD74/PAK3/SLA2/RIPOR2/MYB/NKX2-3/CD70/CCR7/LRRC32/DPP4	10
BP	GO:0021782	glial cell development	4/221	111/17913	0.0486894	0.38327	0.351385	ID2/POU3F1/C5AR1/DLL1	4
BP	GO:0051149	positive regulation of muscle cell differentiation	4/221	111/17913	0.0486894	0.38327	0.351385	RIPOR2/TRIM32/GREM1/MAMSTR	4
BP	GO:0007015	actin filament organization	8/221	325/17913	0.0489765	0.384353	0.352378	SPTB/PAK3/ACTN2/SH3BP1/TNNT2/CCR7/PLEKHH2/CDC42EP5	8
BP	GO:0010575	positive regulation of vascular endothelial growth factor production	2/221	29/17913	0.0494661	0.384353	0.352378	NODAL/C5AR1	2
BP	GO:0021696	cerebellar cortex morphogenesis	2/221	29/17913	0.0494661	0.384353	0.352378	LHX5/DLL1	2
BP	GO:0042491	inner ear auditory receptor cell differentiation	2/221	29/17913	0.0494661	0.384353	0.352378	RIPOR2/DLL1	2
BP	GO:2000036	regulation of stem cell population maintenance	2/221	29/17913	0.0494661	0.384353	0.352378	PAX2/NODAL	2
BP	GO:0072171	mesonephric tubule morphogenesis	3/221	67/17913	0.0499034	0.386696	0.354526	PAX2/FGF8/GREM1	3
BP	GO:0008645	hexose transmembrane transport	4/221	112/17913	0.0500249	0.386696	0.354526	HNF1A/FGF19/PRKCB/SLC2A4	4
BP	GO:0046677	response to antibiotic	8/221	328/17913	0.0511688	0.394525	0.361704	PAX2/ADCYAP1R1/SLC1A3/HMOX1/MYB/SLC2A4/HBA2/HBA1	8
BP	GO:0002088	lens development in camera-type eye	3/221	68/17913	0.0517488	0.394621	0.361791	HIPK1/FRS2/LCTL	3
BP	GO:0043647	inositol phosphate metabolic process	3/221	68/17913	0.0517488	0.394621	0.361791	ADCYAP1R1/PLD4/PTAFR	3
BP	GO:0046323	glucose import	3/221	68/17913	0.0517488	0.394621	0.361791	HNF1A/FGF19/SLC2A4	3
BP	GO:0007202	activation of phospholipase C activity	2/221	30/17913	0.0525791	0.394621	0.361791	ADCYAP1R1/C5AR1	2
BP	GO:0010862	positive regulation of pathway-restricted SMAD protein phosphorylation	2/221	30/17913	0.0525791	0.394621	0.361791	ACVR1B/NODAL	2
BP	GO:0034694	response to prostaglandin	2/221	30/17913	0.0525791	0.394621	0.361791	APOB/CCR7	2
BP	GO:0038111	interleukin-7-mediated signaling pathway	2/221	30/17913	0.0525791	0.394621	0.361791	HIST1H3F/HIST1H3C	2
BP	GO:0051491	positive regulation of filopodium assembly	2/221	30/17913	0.0525791	0.394621	0.361791	RIPOR2/CCR7	2
BP	GO:0061082	myeloid leukocyte cytokine production	2/221	30/17913	0.0525791	0.394621	0.361791	CD74/HMOX1	2
BP	GO:0001101	response to acid chemical	8/221	330/17913	0.0526652	0.394621	0.361791	GIPR/WNT8B/PAX2/APOB/MYB/CCR7/PDGFC/PTAFR	8
BP	GO:0007368	determination of left/right symmetry	4/221	114/17913	0.0527561	0.394621	0.361791	FGF8/TBX2/NODAL/DLL1	4
BP	GO:0015749	monosaccharide transmembrane transport	4/221	114/17913	0.0527561	0.394621	0.361791	HNF1A/FGF19/PRKCB/SLC2A4	4
BP	GO:0009063	cellular amino acid catabolic process	4/221	115/17913	0.0541516	0.404054	0.37044	KMO/SDSL/AGXT/IDO2	4
BP	GO:0034765	regulation of ion transmembrane transport	10/221	453/17913	0.0549895	0.406968	0.373111	TRPM5/CACNG4/ACTN2/CAB39/SCN3A/KCNJ16/CXCL11/PTAFR/KCNQ3/KEL	10
BP	GO:0019935	cyclic-nucleotide-mediated signaling	5/221	166/17913	0.0550877	0.406968	0.373111	GIPR/ADCYAP1R1/EPHA5/TSHR/CXCL11	5
BP	GO:0060193	positive regulation of lipase activity	3/221	70/17913	0.0555373	0.406968	0.373111	ADCYAP1R1/PTAFR/C5AR1	3
BP	GO:0034219	carbohydrate transmembrane transport	4/221	116/17913	0.055567	0.406968	0.373111	HNF1A/FGF19/PRKCB/SLC2A4	4
BP	GO:0002675	positive regulation of acute inflammatory response	2/221	31/17913	0.0557601	0.406968	0.373111	CCR7/C2CD4A	2
BP	GO:0014904	myotube cell development	2/221	31/17913	0.0557601	0.406968	0.373111	RIPOR2/KEL	2
BP	GO:0045987	positive regulation of smooth muscle contraction	2/221	31/17913	0.0557601	0.406968	0.373111	PTAFR/TACR3	2
BP	GO:0048854	brain morphogenesis	2/221	31/17913	0.0557601	0.406968	0.373111	PAX2/FGF8	2
BP	GO:1902230	negative regulation of intrinsic apoptotic signaling pathway in response to DNA damage	2/221	31/17913	0.0557601	0.406968	0.373111	CD74/TRIM32	2
BP	GO:0032200	telomere organization	5/221	167/17913	0.0562448	0.409511	0.375443	PINX1/HIST1H3F/HIST1H3C/HIST1H4A/HIST1H4B	5
BP	GO:0097193	intrinsic apoptotic signaling pathway	7/221	277/17913	0.0565001	0.410376	0.376236	CD74/HMOX1/TRIM32/IFI6/CHAC1/HIPK1/NUPR1	7
BP	GO:0033555	multicellular organismal response to stress	3/221	71/17913	0.05748	0.416487	0.381839	ADCYAP1R1/SLC6A2/DPP4	3
BP	GO:0072511	divalent inorganic cation transport	10/221	458/17913	0.0583372	0.42156	0.38649	TRPM5/CACNG4/ADCYAP1R1/PKD2L2/SLC8A2/CCR7/TCN1/PKD1L2/PRKCB/CXCL11	10
BP	GO:0045137	development of primary sexual characteristics	6/221	223/17913	0.0585938	0.42156	0.38649	ADCYAP1R1/PCYT1B/FGF8/ACVR1B/NUPR1/DACH1	6
BP	GO:0008217	regulation of blood pressure	5/221	169/17913	0.0586007	0.42156	0.38649	HMOX1/ID2/PTAFR/TACR3/DLL1	5
BP	GO:0071276	cellular response to cadmium ion	2/221	32/17913	0.0590068	0.423469	0.38824	HMOX1/MT1F	2
BP	GO:0043122	regulation of I-kappaB kinase/NF-kappaB signaling	6/221	224/17913	0.0596173	0.425817	0.390393	CD74/HMOX1/TRIM32/CCR7/PRKCB/TMEM106A	6
BP	GO:0050851	antigen receptor-mediated signaling pathway	6/221	224/17913	0.0596173	0.425817	0.390393	PAK3/FYB1/SLA2/CCR7/PRKCB/PVRIG	6
BP	GO:0002429	immune response-activating cell surface receptor signaling pathway	9/221	399/17913	0.0598319	0.426337	0.39087	PAK3/FYB1/SLA2/CCR7/PRKCB/MUC17/C5AR1/NCR3/PVRIG	9
BP	GO:0034101	erythrocyte homeostasis	4/221	120/17913	0.0614268	0.435877	0.399616	HMOX1/ID2/ACVR1B/ISG15	4
BP	GO:0008652	cellular amino acid biosynthetic process	3/221	73/17913	0.0614606	0.435877	0.399616	SLC1A3/GATM/AGXT	3
BP	GO:0003338	metanephros morphogenesis	2/221	33/17913	0.0623173	0.439878	0.403284	PAX2/GREM1	2
BP	GO:0016242	negative regulation of macroautophagy	2/221	33/17913	0.0623173	0.439878	0.403284	HMOX1/NUPR1	2
BP	GO:0044106	cellular amine metabolic process	4/221	121/17913	0.0629409	0.442204	0.405416	KMO/DDC/TACR3/IDO2	4
BP	GO:0055007	cardiac muscle cell differentiation	4/221	121/17913	0.0629409	0.442204	0.405416	ACTN2/FRS2/GREM1/DLL1	4
BP	GO:0044282	small molecule catabolic process	9/221	404/17913	0.0636561	0.44517	0.408136	KMO/ALDH1L2/SDSL/CYP39A1/MMAA/PGAM2/CYP4F11/AGXT/IDO2	9
BP	GO:0006486	protein glycosylation	6/221	228/17913	0.0638177	0.44517	0.408136	MFNG/FKTN/TET1/GALNT13/MUC17/ST8SIA3	6
BP	GO:0043413	macromolecule glycosylation	6/221	228/17913	0.0638177	0.44517	0.408136	MFNG/FKTN/TET1/GALNT13/MUC17/ST8SIA3	6
BP	GO:0034763	negative regulation of transmembrane transport	4/221	122/17913	0.0644747	0.44517	0.408136	ACTN2/CAB39/PRKCB/KEL	4
BP	GO:0006875	cellular metal ion homeostasis	10/221	467/17913	0.0646943	0.44517	0.408136	GIPR/CP/ADCYAP1R1/HMOX1/SLC8A2/CCR7/PRKCB/CXCL11/KEL/CLN3	10
BP	GO:0031016	pancreas development	3/221	75/17913	0.0655665	0.44517	0.408136	GIPR/HNF1A/DLL1	3
BP	GO:0072078	nephron tubule morphogenesis	3/221	75/17913	0.0655665	0.44517	0.408136	PAX2/FGF8/GREM1	3
BP	GO:0072332	intrinsic apoptotic signaling pathway by p53 class mediator	3/221	75/17913	0.0655665	0.44517	0.408136	CD74/HIPK1/NUPR1	3
BP	GO:0006790	sulfur compound metabolic process	8/221	346/17913	0.0656502	0.44517	0.408136	ABHD14B/HS3ST3B1/CHAC1/CHST5/NDST2/AGXT/BGN/TSTD1	8
BP	GO:0010574	regulation of vascular endothelial growth factor production	2/221	34/17913	0.0656893	0.44517	0.408136	NODAL/C5AR1	2
BP	GO:0018149	peptide cross-linking	2/221	34/17913	0.0656893	0.44517	0.408136	TGM4/BGN	2
BP	GO:0035909	aorta morphogenesis	2/221	34/17913	0.0656893	0.44517	0.408136	FGF8/TBX2	2
BP	GO:0045777	positive regulation of blood pressure	2/221	34/17913	0.0656893	0.44517	0.408136	ID2/TACR3	2
BP	GO:0060795	cell fate commitment involved in formation of primary germ layer	2/221	34/17913	0.0656893	0.44517	0.408136	PAX2/NODAL	2
BP	GO:0097009	energy homeostasis	2/221	34/17913	0.0656893	0.44517	0.408136	SLC35D3/DLL1	2
BP	GO:0000302	response to reactive oxygen species	6/221	230/17913	0.0659818	0.44517	0.408136	PAX2/HMOX1/MYB/CCR7/HBA2/HBA1	6
BP	GO:0030326	embryonic limb morphogenesis	4/221	123/17913	0.0660279	0.44517	0.408136	FGF8/TBX2/HOXD13/GREM1	4
BP	GO:0035113	embryonic appendage morphogenesis	4/221	123/17913	0.0660279	0.44517	0.408136	FGF8/TBX2/HOXD13/GREM1	4
BP	GO:0043900	regulation of multi-organism process	9/221	408/17913	0.0668252	0.449538	0.41214	CD74/TRIM32/OASL/ACVR1B/NODAL/IFI27/KLK7/PTAFR/ISG15	9
BP	GO:0003281	ventricular septum development	3/221	76/17913	0.0676656	0.453164	0.415464	ID2/FRS2/MDM4	3
BP	GO:0048844	artery morphogenesis	3/221	76/17913	0.0676656	0.453164	0.415464	APOB/FGF8/TBX2	3
BP	GO:0048871	multicellular organismal homeostasis	10/221	472/17913	0.0684119	0.453916	0.416154	NOVA2/TRIM32/PRDM16/PDGFC/TSHR/BSCL2/GATM/SLC35D3/HRNR/DLL1	10
BP	GO:0051493	regulation of cytoskeleton organization	10/221	472/17913	0.0684119	0.453916	0.416154	SPTB/PAK3/ACTN2/SH3BP1/TUBB4A/CCR7/EPHA5/PLEKHH2/SKA1/CDC42EP5	10
BP	GO:0010831	positive regulation of myotube differentiation	2/221	35/17913	0.069121	0.453916	0.416154	RIPOR2/MAMSTR	2
BP	GO:0021587	cerebellum morphogenesis	2/221	35/17913	0.069121	0.453916	0.416154	LHX5/DLL1	2
BP	GO:0030835	negative regulation of actin filament depolymerization	2/221	35/17913	0.069121	0.453916	0.416154	SPTB/PLEKHH2	2
BP	GO:0048333	mesodermal cell differentiation	2/221	35/17913	0.069121	0.453916	0.416154	PAX2/NODAL	2
BP	GO:0048710	regulation of astrocyte differentiation	2/221	35/17913	0.069121	0.453916	0.416154	ID2/C5AR1	2
BP	GO:0030317	flagellated sperm motility	3/221	77/17913	0.0697951	0.453916	0.416154	APOB/TACR3/CATSPERZ	3
BP	GO:0048708	astrocyte differentiation	3/221	77/17913	0.0697951	0.453916	0.416154	ID2/C5AR1/DLL1	3
BP	GO:0060411	cardiac septum morphogenesis	3/221	77/17913	0.0697951	0.453916	0.416154	FGF8/ID2/TBX2	3
BP	GO:0072088	nephron epithelium morphogenesis	3/221	77/17913	0.0697951	0.453916	0.416154	PAX2/FGF8/GREM1	3
BP	GO:0097722	sperm motility	3/221	77/17913	0.0697951	0.453916	0.416154	APOB/TACR3/CATSPERZ	3
BP	GO:0007369	gastrulation	5/221	178/17913	0.0698914	0.453916	0.416154	WNT8B/PAX2/FGF8/NODAL/FRS2	5
BP	GO:0061138	morphogenesis of a branching epithelium	5/221	178/17913	0.0698914	0.453916	0.416154	PAX2/FGF8/HOXD13/FRS2/GREM1	5
BP	GO:0070588	calcium ion transmembrane transport	7/221	293/17913	0.0716348	0.462583	0.4241	TRPM5/CACNG4/PKD2L2/SLC8A2/CCR7/PKD1L2/CXCL11	7
BP	GO:0032271	regulation of protein polymerization	5/221	180/17913	0.0725527	0.462583	0.4241	SPTB/PAK3/TUBB4A/CCR7/CDC42EP5	5
BP	GO:0006816	calcium ion transport	9/221	415/17913	0.0726073	0.462583	0.4241	TRPM5/CACNG4/ADCYAP1R1/PKD2L2/SLC8A2/CCR7/PKD1L2/PRKCB/CXCL11	9
BP	GO:0003156	regulation of animal organ formation	2/221	36/17913	0.0726103	0.462583	0.4241	FGF8/FRS2	2
BP	GO:0006699	bile acid biosynthetic process	2/221	36/17913	0.0726103	0.462583	0.4241	CYP39A1/FGF19	2
BP	GO:0010573	vascular endothelial growth factor production	2/221	36/17913	0.0726103	0.462583	0.4241	NODAL/C5AR1	2
BP	GO:0042417	dopamine metabolic process	2/221	36/17913	0.0726103	0.462583	0.4241	DDC/TACR3	2
BP	GO:0071634	regulation of transforming growth factor beta production	2/221	36/17913	0.0726103	0.462583	0.4241	MYB/LRRC32	2
BP	GO:1905332	positive regulation of morphogenesis of an epithelium	2/221	36/17913	0.0726103	0.462583	0.4241	PAX2/GREM1	2
BP	GO:0009308	amine metabolic process	4/221	128/17913	0.0740835	0.465451	0.42673	KMO/DDC/TACR3/IDO2	4
BP	GO:0032355	response to estradiol	4/221	128/17913	0.0740835	0.465451	0.42673	WNT8B/ADCYAP1R1/APOB/TACR3	4
BP	GO:0072175	epithelial tube formation	4/221	128/17913	0.0740835	0.465451	0.42673	PAX2/FGF8/NODAL/GREM1	4
BP	GO:0001708	cell fate specification	3/221	79/17913	0.0741441	0.465451	0.42673	PAX2/NODAL/DLL1	3
BP	GO:0032642	regulation of chemokine production	3/221	79/17913	0.0741441	0.465451	0.42673	CD74/HMOX1/TRIM32	3
BP	GO:0061333	renal tubule morphogenesis	3/221	79/17913	0.0741441	0.465451	0.42673	PAX2/FGF8/GREM1	3
BP	GO:0072028	nephron morphogenesis	3/221	79/17913	0.0741441	0.465451	0.42673	PAX2/FGF8/GREM1	3
BP	GO:0045165	cell fate commitment	6/221	238/17913	0.0750639	0.470244	0.431123	PAX2/FGF8/ID2/TBX2/NODAL/DLL1	6
BP	GO:1903708	positive regulation of hemopoiesis	5/221	182/17913	0.075269	0.470548	0.431403	CD74/ID2/MYB/ACVR1B/ISG15	5
BP	GO:0003206	cardiac chamber morphogenesis	4/221	129/17913	0.0757519	0.471606	0.432373	FGF8/ID2/TNNT2/TBX2	4
BP	GO:0030833	regulation of actin filament polymerization	4/221	129/17913	0.0757519	0.471606	0.432373	SPTB/PAK3/CCR7/CDC42EP5	4
BP	GO:0035315	hair cell differentiation	2/221	37/17913	0.0761554	0.473139	0.433778	RIPOR2/DLL1	2
BP	GO:0009798	axis specification	3/221	80/17913	0.0763628	0.473449	0.434062	NODAL/FRS2/DLL1	3
BP	GO:0016571	histone methylation	4/221	130/17913	0.0774392	0.477179	0.437482	MYB/TET1/PRDM16/HIST1H1B	4
BP	GO:0050921	positive regulation of chemotaxis	4/221	130/17913	0.0774392	0.477179	0.437482	CD74/RIPOR2/CCR7/C5AR1	4
BP	GO:0071824	protein-DNA complex subunit organization	6/221	240/17913	0.0774405	0.477179	0.437482	TSPYL6/HIST1H1B/HIST1H3F/HIST1H3C/HIST1H4A/HIST1H4B	6
BP	GO:1902930	regulation of alcohol biosynthetic process	3/221	81/17913	0.0786106	0.480061	0.440124	ADCYAP1R1/APOB/PTAFR	3
BP	GO:0042180	cellular ketone metabolic process	6/221	241/17913	0.0786446	0.480061	0.440124	KMO/HSD17B3/FGF19/CYP4F11/IDO2/CYP2B6	6
BP	GO:0070085	glycosylation	6/221	241/17913	0.0786446	0.480061	0.440124	MFNG/FKTN/TET1/GALNT13/MUC17/ST8SIA3	6
BP	GO:0048732	gland development	9/221	422/17913	0.0786916	0.480061	0.440124	HMOX1/FGF8/ID2/NKX2-3/TBX2/HOXD13/HNF1A/NODAL/FRS2	9
BP	GO:0002521	leukocyte differentiation	10/221	485/17913	0.0787064	0.480061	0.440124	CD74/MFNG/ID2/MYB/NKX2-3/CCR7/HNF1A/C17orf99/PRTN3/DLL1	10
BP	GO:0003231	cardiac ventricle development	4/221	131/17913	0.0791453	0.481569	0.441506	ID2/TNNT2/FRS2/MDM4	4
BP	GO:0010559	regulation of glycoprotein biosynthetic process	2/221	38/17913	0.0797543	0.481569	0.441506	FKTN/CCR7	2
BP	GO:0050856	regulation of T cell receptor signaling pathway	2/221	38/17913	0.0797543	0.481569	0.441506	CCR7/PVRIG	2
BP	GO:0071604	transforming growth factor beta production	2/221	38/17913	0.0797543	0.481569	0.441506	MYB/LRRC32	2
BP	GO:2000279	negative regulation of DNA biosynthetic process	2/221	38/17913	0.0797543	0.481569	0.441506	PINX1/DACH1	2
BP	GO:0032147	activation of protein kinase activity	7/221	303/17913	0.0822098	0.4954	0.454187	CD74/PAK3/CAB39/PDGFC/FRS2/GREM1/C5AR1	7
BP	GO:0009072	aromatic amino acid family metabolic process	2/221	39/17913	0.0834052	0.495651	0.454417	KMO/IDO2	2
BP	GO:0021575	hindbrain morphogenesis	2/221	39/17913	0.0834052	0.495651	0.454417	LHX5/DLL1	2
BP	GO:0030049	muscle filament sliding	2/221	39/17913	0.0834052	0.495651	0.454417	ACTN2/TNNT2	2
BP	GO:0033275	actin-myosin filament sliding	2/221	39/17913	0.0834052	0.495651	0.454417	ACTN2/TNNT2	2
BP	GO:0071548	response to dexamethasone	2/221	39/17913	0.0834052	0.495651	0.454417	FBXO32/PTAFR	2
BP	GO:1902229	regulation of intrinsic apoptotic signaling pathway in response to DNA damage	2/221	39/17913	0.0834052	0.495651	0.454417	CD74/TRIM32	2
BP	GO:2000008	regulation of protein localization to cell surface	2/221	39/17913	0.0834052	0.495651	0.454417	ACTN2/LEPROT	2
BP	GO:0034332	adherens junction organization	4/221	134/17913	0.0843751	0.499752	0.458176	ACTN2/HIPK1/GREM1/CADM2	4
BP	GO:0002696	positive regulation of leukocyte activation	7/221	305/17913	0.0844276	0.499752	0.458176	CD74/PAK3/MYB/CD70/CCR7/PTAFR/DPP4	7
BP	GO:0022411	cellular component disassembly	10/221	492/17913	0.0846282	0.499955	0.458363	SPTB/WNT8B/ACTN2/SH3BP1/PADI2/PLEKHH2/PRKCB/KLK7/DPP4/CLN3	10
BP	GO:1901379	regulation of potassium ion transmembrane transport	3/221	84/17913	0.085525	0.504262	0.462312	ACTN2/CAB39/KEL	3
BP	GO:0006694	steroid biosynthetic process	5/221	190/17913	0.0866779	0.509588	0.467195	APOB/HSD17B3/CYP39A1/FGF19/SDR42E1	5
BP	GO:0032924	activin receptor signaling pathway	2/221	40/17913	0.0871062	0.509588	0.467195	ACVR1B/NODAL	2
BP	GO:0071470	cellular response to osmotic stress	2/221	40/17913	0.0871062	0.509588	0.467195	CAB39/SLC2A4	2
BP	GO:2000273	positive regulation of signaling receptor activity	2/221	40/17913	0.0871062	0.509588	0.467195	CACNG4/GREM1	2
BP	GO:0045844	positive regulation of striated muscle tissue development	3/221	85/17913	0.0878856	0.510178	0.467735	TBX2/GREM1/DLL1	3
BP	GO:0048636	positive regulation of muscle organ development	3/221	85/17913	0.0878856	0.510178	0.467735	TBX2/GREM1/DLL1	3
BP	GO:1903901	negative regulation of viral life cycle	3/221	85/17913	0.0878856	0.510178	0.467735	TRIM32/OASL/ISG15	3
BP	GO:1904063	negative regulation of cation transmembrane transport	3/221	85/17913	0.0878856	0.510178	0.467735	ACTN2/CAB39/KEL	3
BP	GO:0001763	morphogenesis of a branching structure	5/221	192/17913	0.0896644	0.514507	0.471704	PAX2/FGF8/HOXD13/FRS2/GREM1	5
BP	GO:0002768	immune response-regulating cell surface receptor signaling pathway	9/221	434/17913	0.0898268	0.514507	0.471704	PAK3/FYB1/SLA2/CCR7/PRKCB/MUC17/C5AR1/NCR3/PVRIG	9
BP	GO:2000027	regulation of animal organ morphogenesis	6/221	250/17913	0.0899548	0.514507	0.471704	PAX2/FGF8/TBX2/HOXD13/FRS2/GREM1	6
BP	GO:0032602	chemokine production	3/221	86/17913	0.0902736	0.514507	0.471704	CD74/HMOX1/TRIM32	3
BP	GO:1901863	positive regulation of muscle tissue development	3/221	86/17913	0.0902736	0.514507	0.471704	TBX2/GREM1/DLL1	3
BP	GO:0009636	response to toxic substance	10/221	499/17913	0.090816	0.514507	0.471704	PAX2/ADCYAP1R1/RGS17/HMOX1/MYB/DDC/NUPR1/SLC2A4/HBA2/HBA1	10
BP	GO:0043410	positive regulation of MAPK cascade	10/221	499/17913	0.090816	0.514507	0.471704	CD74/PAK3/FGF8/CCR7/NODAL/FGF19/FRS2/TMEM106A/C5AR1/ARHGAP8	10
BP	GO:0014002	astrocyte development	2/221	41/17913	0.0908557	0.514507	0.471704	C5AR1/DLL1	2
BP	GO:0050873	brown fat cell differentiation	2/221	41/17913	0.0908557	0.514507	0.471704	PRDM16/SLC2A4	2
BP	GO:0072210	metanephric nephron development	2/221	41/17913	0.0908557	0.514507	0.471704	PAX2/GREM1	2
BP	GO:0090184	positive regulation of kidney development	2/221	41/17913	0.0908557	0.514507	0.471704	PAX2/GREM1	2
BP	GO:0098760	response to interleukin-7	2/221	41/17913	0.0908557	0.514507	0.471704	HIST1H3F/HIST1H3C	2
BP	GO:0098761	cellular response to interleukin-7	2/221	41/17913	0.0908557	0.514507	0.471704	HIST1H3F/HIST1H3C	2
BP	GO:0097164	ammonium ion metabolic process	5/221	193/17913	0.0911776	0.515359	0.472485	PCYT1B/DDC/TACR3/ENPP7/CLN3	5
BP	GO:0002700	regulation of production of molecular mediator of immune response	4/221	138/17913	0.0916046	0.515527	0.472639	CD74/HMOX1/KLK7/C17orf99	4
BP	GO:0044344	cellular response to fibroblast growth factor stimulus	4/221	138/17913	0.0916046	0.515527	0.472639	ANOS1/FGF8/FGF19/FRS2	4
BP	GO:1901615	organic hydroxy compound metabolic process	10/221	500/17913	0.0917216	0.515527	0.472639	ADCYAP1R1/APOB/HSD17B3/DDC/BCO1/CYP39A1/FGF19/PLD4/PTAFR/TACR3	10
BP	GO:0007215	glutamate receptor signaling pathway	3/221	87/17913	0.0926885	0.515865	0.472949	CACNG4/ACTN2/CLN3	3
BP	GO:0043648	dicarboxylic acid metabolic process	3/221	87/17913	0.0926885	0.515865	0.472949	SLC1A3/KMO/ALDH1L2	3
BP	GO:0060021	roof of mouth development	3/221	87/17913	0.0926885	0.515865	0.472949	TBX2/LRRC32/PRDM16	3
BP	GO:0061564	axon development	9/221	438/17913	0.0937364	0.515865	0.472949	ANOS1/SPTB/PAX2/PAK3/FGF8/TRIM32/EPHA5/FRS2/KEL	9
BP	GO:0006874	cellular calcium ion homeostasis	8/221	375/17913	0.0938555	0.515865	0.472949	GIPR/ADCYAP1R1/SLC8A2/CCR7/PRKCB/CXCL11/KEL/CLN3	8
BP	GO:0007249	I-kappaB kinase/NF-kappaB signaling	6/221	253/17913	0.0939124	0.515865	0.472949	CD74/HMOX1/TRIM32/CCR7/PRKCB/TMEM106A	6
BP	GO:0009069	serine family amino acid metabolic process	2/221	42/17913	0.0946518	0.515865	0.472949	SDSL/AGXT	2
BP	GO:0014047	glutamate secretion	2/221	42/17913	0.0946518	0.515865	0.472949	SLC1A3/KMO	2
BP	GO:0017001	antibiotic catabolic process	2/221	42/17913	0.0946518	0.515865	0.472949	HBA2/HBA1	2
BP	GO:0034080	CENP-A containing nucleosome assembly	2/221	42/17913	0.0946518	0.515865	0.472949	HIST1H4A/HIST1H4B	2
BP	GO:0048247	lymphocyte chemotaxis	2/221	42/17913	0.0946518	0.515865	0.472949	PADI2/CXCL11	2
BP	GO:0051489	regulation of filopodium assembly	2/221	42/17913	0.0946518	0.515865	0.472949	RIPOR2/CCR7	2
BP	GO:0061641	CENP-A containing chromatin organization	2/221	42/17913	0.0946518	0.515865	0.472949	HIST1H4A/HIST1H4B	2
BP	GO:0031058	positive regulation of histone modification	3/221	88/17913	0.09513	0.515865	0.472949	MYB/TET1/HIST1H1B	3
BP	GO:0072073	kidney epithelium development	4/221	140/17913	0.0953271	0.515865	0.472949	PAX2/FGF8/GREM1/DLL1	4
BP	GO:0032103	positive regulation of response to external stimulus	7/221	315/17913	0.0960272	0.515865	0.472949	CD74/RIPOR2/CCR7/KLK7/NUPR1/C5AR1/C2CD4A	7
BP	GO:0051053	negative regulation of DNA metabolic process	4/221	141/17913	0.0972148	0.515865	0.472949	TET1/ENPP7/PINX1/DACH1	4
BP	GO:0009953	dorsal/ventral pattern formation	3/221	89/17913	0.0975978	0.515865	0.472949	WNT8B/FGF8/GREM1	3
BP	GO:0006775	fat-soluble vitamin metabolic process	2/221	43/17913	0.0984928	0.515865	0.472949	BCO1/CYP4F11	2
BP	GO:0031018	endocrine pancreas development	2/221	43/17913	0.0984928	0.515865	0.472949	GIPR/DLL1	2
BP	GO:0043300	regulation of leukocyte degranulation	2/221	43/17913	0.0984928	0.515865	0.472949	HMOX1/PTAFR	2
BP	GO:0097028	dendritic cell differentiation	2/221	43/17913	0.0984928	0.515865	0.472949	CCR7/PRTN3	2
BP	GO:0072006	nephron development	4/221	142/17913	0.0991201	0.515865	0.472949	PAX2/FGF8/GREM1/DLL1	4
BP	GO:0051091	positive regulation of DNA-binding transcription factor activity	6/221	257/17913	0.099333	0.515865	0.472949	TRIM32/EPHA5/NODAL/PRKCB/GREM1/RHEBL1	6
BP	GO:0034333	adherens junction assembly	3/221	90/17913	0.100091	0.515865	0.472949	ACTN2/HIPK1/GREM1	3
BP	GO:0098661	inorganic anion transmembrane transport	3/221	90/17913	0.100091	0.515865	0.472949	SLC1A3/PTAFR/SLC26A9	3
BP	GO:0051251	positive regulation of lymphocyte activation	6/221	258/17913	0.100714	0.515865	0.472949	CD74/PAK3/MYB/CD70/CCR7/DPP4	6
BP	GO:0060485	mesenchyme development	6/221	258/17913	0.100714	0.515865	0.472949	PAX2/FGF8/TBX2/NODAL/GREM1/MDM4	6
BP	GO:0050867	positive regulation of cell activation	7/221	319/17913	0.100903	0.515865	0.472949	CD74/PAK3/MYB/CD70/CCR7/PTAFR/DPP4	7
BP	GO:0001667	ameboidal-type cell migration	9/221	446/17913	0.101851	0.515865	0.472949	PAK3/SH3BP1/HMOX1/FGF8/ACVR1B/ITGB7/NODAL/GREM1/DPP4	9
BP	GO:0030225	macrophage differentiation	2/221	44/17913	0.102377	0.515865	0.472949	ID2/NKX2-3	2
BP	GO:0030850	prostate gland development	2/221	44/17913	0.102377	0.515865	0.472949	HOXD13/FRS2	2
BP	GO:0034383	low-density lipoprotein particle clearance	2/221	44/17913	0.102377	0.515865	0.472949	APOB/HMOX1	2
BP	GO:0035850	epithelial cell differentiation involved in kidney development	2/221	44/17913	0.102377	0.515865	0.472949	PAX2/GREM1	2
BP	GO:0042398	cellular modified amino acid biosynthetic process	2/221	44/17913	0.102377	0.515865	0.472949	CHAC1/GATM	2
BP	GO:0000041	transition metal ion transport	3/221	91/17913	0.10261	0.515865	0.472949	CP/TCN1/ATP6V0E2	3
BP	GO:0045765	regulation of angiogenesis	8/221	383/17913	0.102696	0.515865	0.472949	AGO1/HMOX1/NODAL/HIPK1/PRKCB/GREM1/C5AR1/DLL1	8
BP	GO:0035148	tube formation	4/221	144/17913	0.102982	0.515865	0.472949	PAX2/FGF8/NODAL/GREM1	4
BP	GO:0002573	myeloid leukocyte differentiation	5/221	201/17913	0.103753	0.515865	0.472949	CD74/ID2/NKX2-3/CCR7/PRTN3	5
BP	GO:0002262	myeloid cell homeostasis	4/221	145/17913	0.104939	0.515865	0.472949	HMOX1/ID2/ACVR1B/ISG15	4
BP	GO:0030041	actin filament polymerization	4/221	145/17913	0.104939	0.515865	0.472949	SPTB/PAK3/CCR7/CDC42EP5	4
BP	GO:0050806	positive regulation of synaptic transmission	4/221	145/17913	0.104939	0.515865	0.472949	SLC1A3/KMO/SLC8A2/RAPSN	4
BP	GO:0071774	response to fibroblast growth factor	4/221	145/17913	0.104939	0.515865	0.472949	ANOS1/FGF8/FGF19/FRS2	4
BP	GO:0006821	chloride transport	3/221	92/17913	0.105155	0.515865	0.472949	SLC1A3/PTAFR/SLC26A9	3
BP	GO:0045638	negative regulation of myeloid cell differentiation	3/221	92/17913	0.105155	0.515865	0.472949	DLL1/HIST1H4A/HIST1H4B	3
BP	GO:0001974	blood vessel remodeling	2/221	45/17913	0.106303	0.515865	0.472949	FGF8/BGN	2
BP	GO:0002067	glandular epithelial cell differentiation	2/221	45/17913	0.106303	0.515865	0.472949	FGF8/DLL1	2
BP	GO:0032007	negative regulation of TOR signaling	2/221	45/17913	0.106303	0.515865	0.472949	DEPTOR/RNF152	2
BP	GO:0045058	T cell selection	2/221	45/17913	0.106303	0.515865	0.472949	CD74/CCR7	2
BP	GO:0050922	negative regulation of chemotaxis	2/221	45/17913	0.106303	0.515865	0.472949	PADI2/GREM1	2
BP	GO:0061756	leukocyte adhesion to vascular endothelial cell	2/221	45/17913	0.106303	0.515865	0.472949	ITGB7/PTAFR	2
BP	GO:0071675	regulation of mononuclear cell migration	2/221	45/17913	0.106303	0.515865	0.472949	GREM1/C5AR1	2
BP	GO:1903018	regulation of glycoprotein metabolic process	2/221	45/17913	0.106303	0.515865	0.472949	FKTN/CCR7	2
BP	GO:0016331	morphogenesis of embryonic epithelium	4/221	146/17913	0.106913	0.515865	0.472949	PAX2/FGF8/NODAL/GREM1	4
BP	GO:0035107	appendage morphogenesis	4/221	146/17913	0.106913	0.515865	0.472949	FGF8/TBX2/HOXD13/GREM1	4
BP	GO:0035108	limb morphogenesis	4/221	146/17913	0.106913	0.515865	0.472949	FGF8/TBX2/HOXD13/GREM1	4
BP	GO:0043524	negative regulation of neuron apoptotic process	4/221	146/17913	0.106913	0.515865	0.472949	HMOX1/FGF8/C5AR1/CLN3	4
BP	GO:0001655	urogenital system development	7/221	324/17913	0.107186	0.515865	0.472949	PAX2/FGF8/ID2/HOXD13/FRS2/GREM1/DLL1	7
BP	GO:0019058	viral life cycle	7/221	324/17913	0.107186	0.515865	0.472949	CD74/TRIM32/OASL/ITGB7/IFI27/ISG15/DPP4	7
BP	GO:0002702	positive regulation of production of molecular mediator of immune response	3/221	93/17913	0.107723	0.515865	0.472949	CD74/KLK7/C17orf99	3
BP	GO:0045785	positive regulation of cell adhesion	8/221	388/17913	0.108451	0.515865	0.472949	CD74/PAK3/MYB/CD70/CCR7/NODAL/PTAFR/DPP4	8
BP	GO:0055074	calcium ion homeostasis	8/221	388/17913	0.108451	0.515865	0.472949	GIPR/ADCYAP1R1/SLC8A2/CCR7/PRKCB/CXCL11/KEL/CLN3	8
BP	GO:0050792	regulation of viral process	5/221	204/17913	0.10868	0.515865	0.472949	CD74/TRIM32/OASL/IFI27/ISG15	5
BP	GO:0000187	activation of MAPK activity	4/221	147/17913	0.108904	0.515865	0.472949	CD74/PAK3/FRS2/C5AR1	4
BP	GO:0009948	anterior/posterior axis specification	2/221	46/17913	0.110269	0.515865	0.472949	NODAL/FRS2	2
BP	GO:0021695	cerebellar cortex development	2/221	46/17913	0.110269	0.515865	0.472949	LHX5/DLL1	2
BP	GO:0031055	chromatin remodeling at centromere	2/221	46/17913	0.110269	0.515865	0.472949	HIST1H4A/HIST1H4B	2
BP	GO:1904036	negative regulation of epithelial cell apoptotic process	2/221	46/17913	0.110269	0.515865	0.472949	HMOX1/NUPR1	2
BP	GO:2000107	negative regulation of leukocyte apoptotic process	2/221	46/17913	0.110269	0.515865	0.472949	CD74/CCR7	2
BP	GO:0060191	regulation of lipase activity	3/221	94/17913	0.110317	0.515865	0.472949	ADCYAP1R1/PTAFR/C5AR1	3
BP	GO:0070838	divalent metal ion transport	9/221	454/17913	0.110357	0.515865	0.472949	TRPM5/CACNG4/ADCYAP1R1/PKD2L2/SLC8A2/CCR7/PKD1L2/PRKCB/CXCL11	9
BP	GO:0043270	positive regulation of ion transport	6/221	266/17913	0.112121	0.515865	0.472949	CACNG4/ACTN2/ADCYAP1R1/KMO/CXCL11/PTAFR	6
BP	GO:0045927	positive regulation of growth	6/221	266/17913	0.112121	0.515865	0.472949	FGF8/TRIM32/TBX2/CDKN2AIP/HIST1H1B/DLL1	6
BP	GO:0042472	inner ear morphogenesis	3/221	95/17913	0.112934	0.515865	0.472949	PAX2/FGF8/RIPOR2	3
BP	GO:0045069	regulation of viral genome replication	3/221	95/17913	0.112934	0.515865	0.472949	OASL/IFI27/ISG15	3
BP	GO:0060993	kidney morphogenesis	3/221	95/17913	0.112934	0.515865	0.472949	PAX2/FGF8/GREM1	3
BP	GO:0120034	positive regulation of plasma membrane bounded cell projection assembly	3/221	95/17913	0.112934	0.515865	0.472949	RIPOR2/CCR7/CDC42EP5	3
BP	GO:0051092	positive regulation of NF-kappaB transcription factor activity	4/221	149/17913	0.112935	0.515865	0.472949	TRIM32/PRKCB/GREM1/RHEBL1	4
BP	GO:0072503	cellular divalent inorganic cation homeostasis	8/221	392/17913	0.11318	0.515865	0.472949	GIPR/ADCYAP1R1/SLC8A2/CCR7/PRKCB/CXCL11/KEL/CLN3	8
BP	GO:0001961	positive regulation of cytokine-mediated signaling pathway	2/221	47/17913	0.114273	0.515865	0.472949	CD74/TRIM32	2
BP	GO:0008206	bile acid metabolic process	2/221	47/17913	0.114273	0.515865	0.472949	CYP39A1/FGF19	2
BP	GO:0042743	hydrogen peroxide metabolic process	2/221	47/17913	0.114273	0.515865	0.472949	HBA2/HBA1	2
BP	GO:0045815	positive regulation of gene expression, epigenetic	2/221	47/17913	0.114273	0.515865	0.472949	PADI2/TET1	2
BP	GO:0060042	retina morphogenesis in camera-type eye	2/221	47/17913	0.114273	0.515865	0.472949	HIPK1/DLL1	2
BP	GO:0007409	axonogenesis	8/221	393/17913	0.11438	0.515865	0.472949	ANOS1/SPTB/PAX2/PAK3/FGF8/EPHA5/FRS2/KEL	8
BP	GO:0042116	macrophage activation	3/221	96/17913	0.115575	0.515865	0.472949	CD74/TMEM106A/C5AR1	3
BP	GO:0097327	response to antineoplastic agent	3/221	96/17913	0.115575	0.515865	0.472949	HMOX1/FBXO32/PTAFR	3
BP	GO:0072593	reactive oxygen species metabolic process	6/221	269/17913	0.116563	0.515865	0.472949	PAX2/NCF2/IFI6/TMEM106A/HBA2/HBA1	6
BP	GO:0001574	ganglioside biosynthetic process	1/221	10/17913	0.116773	0.515865	0.472949	ST8SIA3	1
BP	GO:0001840	neural plate development	1/221	10/17913	0.116773	0.515865	0.472949	FGF8	1
BP	GO:0002887	negative regulation of myeloid leukocyte mediated immunity	1/221	10/17913	0.116773	0.515865	0.472949	HMOX1	1
BP	GO:0003149	membranous septum morphogenesis	1/221	10/17913	0.116773	0.515865	0.472949	ID2	1
BP	GO:0006971	hypotonic response	1/221	10/17913	0.116773	0.515865	0.472949	CAB39	1
BP	GO:0010944	negative regulation of transcription by competitive promoter binding	1/221	10/17913	0.116773	0.515865	0.472949	DACH1	1
BP	GO:0014049	positive regulation of glutamate secretion	1/221	10/17913	0.116773	0.515865	0.472949	KMO	1
BP	GO:0014877	response to muscle inactivity involved in regulation of muscle adaptation	1/221	10/17913	0.116773	0.515865	0.472949	FBXO32	1
BP	GO:0014894	response to denervation involved in regulation of muscle adaptation	1/221	10/17913	0.116773	0.515865	0.472949	FBXO32	1
BP	GO:0016102	diterpenoid biosynthetic process	1/221	10/17913	0.116773	0.515865	0.472949	BCO1	1
BP	GO:0018242	protein O-linked glycosylation via serine	1/221	10/17913	0.116773	0.515865	0.472949	GALNT13	1
BP	GO:0021562	vestibulocochlear nerve development	1/221	10/17913	0.116773	0.515865	0.472949	PAX2	1
BP	GO:0021936	regulation of cerebellar granule cell precursor proliferation	1/221	10/17913	0.116773	0.515865	0.472949	LHX5	1
BP	GO:0034350	regulation of glial cell apoptotic process	1/221	10/17913	0.116773	0.515865	0.472949	DLL1	1
BP	GO:0034378	chylomicron assembly	1/221	10/17913	0.116773	0.515865	0.472949	APOB	1
BP	GO:0034447	very-low-density lipoprotein particle clearance	1/221	10/17913	0.116773	0.515865	0.472949	APOB	1
BP	GO:0045080	positive regulation of chemokine biosynthetic process	1/221	10/17913	0.116773	0.515865	0.472949	HMOX1	1
BP	GO:0045657	positive regulation of monocyte differentiation	1/221	10/17913	0.116773	0.515865	0.472949	CD74	1
BP	GO:0045792	negative regulation of cell size	1/221	10/17913	0.116773	0.515865	0.472949	DEPTOR	1
BP	GO:0046950	cellular ketone body metabolic process	1/221	10/17913	0.116773	0.515865	0.472949	HMGCLL1	1
BP	GO:0060088	auditory receptor cell stereocilium organization	1/221	10/17913	0.116773	0.515865	0.472949	RIPOR2	1
BP	GO:0060346	bone trabecula formation	1/221	10/17913	0.116773	0.515865	0.472949	GREM1	1
BP	GO:0070099	regulation of chemokine-mediated signaling pathway	1/221	10/17913	0.116773	0.515865	0.472949	PADI2	1
BP	GO:0070472	regulation of uterine smooth muscle contraction	1/221	10/17913	0.116773	0.515865	0.472949	TACR3	1
BP	GO:0071281	cellular response to iron ion	1/221	10/17913	0.116773	0.515865	0.472949	HMOX1	1
BP	GO:0071600	otic vesicle morphogenesis	1/221	10/17913	0.116773	0.515865	0.472949	FGF8	1
BP	GO:0090336	positive regulation of brown fat cell differentiation	1/221	10/17913	0.116773	0.515865	0.472949	PRDM16	1
BP	GO:1900426	positive regulation of defense response to bacterium	1/221	10/17913	0.116773	0.515865	0.472949	KLK7	1
BP	GO:1903265	positive regulation of tumor necrosis factor-mediated signaling pathway	1/221	10/17913	0.116773	0.515865	0.472949	TRIM32	1
BP	GO:2001054	negative regulation of mesenchymal cell apoptotic process	1/221	10/17913	0.116773	0.515865	0.472949	PAX2	1
BP	GO:2001135	regulation of endocytic recycling	1/221	10/17913	0.116773	0.515865	0.472949	ACTN2	1
BP	GO:2001225	regulation of chloride transport	1/221	10/17913	0.116773	0.515865	0.472949	PTAFR	1
BP	GO:0030856	regulation of epithelial cell differentiation	4/221	151/17913	0.117031	0.515865	0.472949	PAX2/NODAL/DLL1/CDSN	4
BP	GO:0009410	response to xenobiotic stimulus	6/221	270/17913	0.118063	0.515865	0.472949	CACNG4/RGS17/FBXO32/PTAFR/TACR3/CYP2B6	6
BP	GO:0034766	negative regulation of ion transmembrane transport	3/221	97/17913	0.118239	0.515865	0.472949	ACTN2/CAB39/KEL	3
BP	GO:0042220	response to cocaine	2/221	48/17913	0.118314	0.515865	0.472949	CACNG4/TACR3	2
BP	GO:0044273	sulfur compound catabolic process	2/221	48/17913	0.118314	0.515865	0.472949	AGXT/BGN	2
BP	GO:0045933	positive regulation of muscle contraction	2/221	48/17913	0.118314	0.515865	0.472949	PTAFR/TACR3	2
BP	GO:0051452	intracellular pH reduction	2/221	48/17913	0.118314	0.515865	0.472949	ATP6V0E2/CLN3	2
BP	GO:0051972	regulation of telomerase activity	2/221	48/17913	0.118314	0.515865	0.472949	GREM1/PINX1	2
BP	GO:0007411	axon guidance	5/221	210/17913	0.11887	0.515865	0.472949	ANOS1/SPTB/FGF8/EPHA5/FRS2	5
BP	GO:0034767	positive regulation of ion transmembrane transport	4/221	152/17913	0.119103	0.515865	0.472949	CACNG4/ACTN2/CXCL11/PTAFR	4
BP	GO:0001657	ureteric bud development	3/221	98/17913	0.120925	0.515865	0.472949	PAX2/FGF8/GREM1	3
BP	GO:0007631	feeding behavior	3/221	98/17913	0.120925	0.515865	0.472949	TACR3/NPW/DACH1	3
BP	GO:0042136	neurotransmitter biosynthetic process	3/221	98/17913	0.120925	0.515865	0.472949	SLC1A3/DDC/AGXT	3
BP	GO:0043266	regulation of potassium ion transport	3/221	98/17913	0.120925	0.515865	0.472949	ACTN2/CAB39/KEL	3
BP	GO:0010001	glial cell differentiation	5/221	212/17913	0.122365	0.515865	0.472949	PAX2/ID2/POU3F1/C5AR1/DLL1	5
BP	GO:0097485	neuron projection guidance	5/221	212/17913	0.122365	0.515865	0.472949	ANOS1/SPTB/FGF8/EPHA5/FRS2	5
BP	GO:0031529	ruffle organization	2/221	49/17913	0.122391	0.515865	0.472949	SH3BP1/CCR7	2
BP	GO:0043949	regulation of cAMP-mediated signaling	2/221	49/17913	0.122391	0.515865	0.472949	GIPR/ADCYAP1R1	2
BP	GO:1903793	positive regulation of anion transport	2/221	49/17913	0.122391	0.515865	0.472949	KMO/PTAFR	2
BP	GO:0032386	regulation of intracellular transport	8/221	400/17913	0.122971	0.515865	0.472949	ACTN2/HMOX1/TNNT2/IFI27/PRKCB/SLC2A4/SLC35D3/LEPROT	8
BP	GO:0001824	blastocyst development	3/221	99/17913	0.123635	0.515865	0.472949	MFNG/TET1/NODAL	3
BP	GO:0008593	regulation of Notch signaling pathway	3/221	99/17913	0.123635	0.515865	0.472949	MFNG/CHAC1/DLL1	3
BP	GO:0048525	negative regulation of viral process	3/221	99/17913	0.123635	0.515865	0.472949	TRIM32/OASL/ISG15	3
BP	GO:0072163	mesonephric epithelium development	3/221	99/17913	0.123635	0.515865	0.472949	PAX2/FGF8/GREM1	3
BP	GO:0072164	mesonephric tubule development	3/221	99/17913	0.123635	0.515865	0.472949	PAX2/FGF8/GREM1	3
BP	GO:0032414	positive regulation of ion transmembrane transporter activity	3/221	100/17913	0.126366	0.515865	0.472949	CACNG4/ACTN2/PTAFR	3
BP	GO:0060840	artery development	3/221	100/17913	0.126366	0.515865	0.472949	APOB/FGF8/TBX2	3
BP	GO:0000731	DNA synthesis involved in DNA repair	2/221	50/17913	0.126502	0.515865	0.472949	TEX12/ISG15	2
BP	GO:0045661	regulation of myoblast differentiation	2/221	50/17913	0.126502	0.515865	0.472949	RIPOR2/DLL1	2
BP	GO:0045851	pH reduction	2/221	50/17913	0.126502	0.515865	0.472949	ATP6V0E2/CLN3	2
BP	GO:0060425	lung morphogenesis	2/221	50/17913	0.126502	0.515865	0.472949	FGF8/NODAL	2
BP	GO:0006338	chromatin remodeling	4/221	156/17913	0.12755	0.515865	0.472949	PADI2/MYB/HIST1H4A/HIST1H4B	4
BP	GO:0007519	skeletal muscle tissue development	4/221	156/17913	0.12755	0.515865	0.472949	RIPOR2/NUPR1/KEL/DLL1	4
BP	GO:0003161	cardiac conduction system development	1/221	11/17913	0.127676	0.515865	0.472949	ID2	1
BP	GO:0006044	N-acetylglucosamine metabolic process	1/221	11/17913	0.127676	0.515865	0.472949	CHST5	1
BP	GO:0006681	galactosylceramide metabolic process	1/221	11/17913	0.127676	0.515865	0.472949	CLN3	1
BP	GO:0006702	androgen biosynthetic process	1/221	11/17913	0.127676	0.515865	0.472949	HSD17B3	1
BP	GO:0006707	cholesterol catabolic process	1/221	11/17913	0.127676	0.515865	0.472949	CYP39A1	1
BP	GO:0009071	serine family amino acid catabolic process	1/221	11/17913	0.127676	0.515865	0.472949	AGXT	1
BP	GO:0009629	response to gravity	1/221	11/17913	0.127676	0.515865	0.472949	PTAFR	1
BP	GO:0014831	gastro-intestinal system smooth muscle contraction	1/221	11/17913	0.127676	0.515865	0.472949	PTAFR	1
BP	GO:0014870	response to muscle inactivity	1/221	11/17913	0.127676	0.515865	0.472949	FBXO32	1
BP	GO:0015802	basic amino acid transport	1/221	11/17913	0.127676	0.515865	0.472949	CLN3	1
BP	GO:0016127	sterol catabolic process	1/221	11/17913	0.127676	0.515865	0.472949	CYP39A1	1
BP	GO:0018095	protein polyglutamylation	1/221	11/17913	0.127676	0.515865	0.472949	TTLL6	1
BP	GO:0019471	4-hydroxyproline metabolic process	1/221	11/17913	0.127676	0.515865	0.472949	EGLN3	1
BP	GO:0019755	one-carbon compound transport	1/221	11/17913	0.127676	0.515865	0.472949	SLC14A1	1
BP	GO:0021534	cell proliferation in hindbrain	1/221	11/17913	0.127676	0.515865	0.472949	C5AR1	1
BP	GO:0021604	cranial nerve structural organization	1/221	11/17913	0.127676	0.515865	0.472949	PAX2	1
BP	GO:0021903	rostrocaudal neural tube patterning	1/221	11/17913	0.127676	0.515865	0.472949	FGF8	1
BP	GO:0032494	response to peptidoglycan	1/221	11/17913	0.127676	0.515865	0.472949	C5AR1	1
BP	GO:0032957	inositol trisphosphate metabolic process	1/221	11/17913	0.127676	0.515865	0.472949	PTAFR	1
BP	GO:0033632	regulation of cell-cell adhesion mediated by integrin	1/221	11/17913	0.127676	0.515865	0.472949	DPP4	1
BP	GO:0034379	very-low-density lipoprotein particle assembly	1/221	11/17913	0.127676	0.515865	0.472949	APOB	1
BP	GO:0043619	regulation of transcription from RNA polymerase II promoter in response to oxidative stress	1/221	11/17913	0.127676	0.515865	0.472949	HMOX1	1
BP	GO:0045059	positive thymic T cell selection	1/221	11/17913	0.127676	0.515865	0.472949	CD74	1
BP	GO:0045217	cell-cell junction maintenance	1/221	11/17913	0.127676	0.515865	0.472949	PRTN3	1
BP	GO:0046007	negative regulation of activated T cell proliferation	1/221	11/17913	0.127676	0.515865	0.472949	LRRC32	1
BP	GO:0048853	forebrain morphogenesis	1/221	11/17913	0.127676	0.515865	0.472949	FGF8	1
BP	GO:0051013	microtubule severing	1/221	11/17913	0.127676	0.515865	0.472949	TTLL6	1
BP	GO:0051974	negative regulation of telomerase activity	1/221	11/17913	0.127676	0.515865	0.472949	PINX1	1
BP	GO:0060837	blood vessel endothelial cell differentiation	1/221	11/17913	0.127676	0.515865	0.472949	DLL1	1
BP	GO:0070471	uterine smooth muscle contraction	1/221	11/17913	0.127676	0.515865	0.472949	TACR3	1
BP	GO:0070857	regulation of bile acid biosynthetic process	1/221	11/17913	0.127676	0.515865	0.472949	FGF19	1
BP	GO:0072017	distal tubule development	1/221	11/17913	0.127676	0.515865	0.472949	PAX2	1
BP	GO:0072070	loop of Henle development	1/221	11/17913	0.127676	0.515865	0.472949	DLL1	1
BP	GO:0072173	metanephric tubule morphogenesis	1/221	11/17913	0.127676	0.515865	0.472949	PAX2	1
BP	GO:0072537	fibroblast activation	1/221	11/17913	0.127676	0.515865	0.472949	MYB	1
BP	GO:0072610	interleukin-12 secretion	1/221	11/17913	0.127676	0.515865	0.472949	CCR7	1
BP	GO:0090193	positive regulation of glomerulus development	1/221	11/17913	0.127676	0.515865	0.472949	PAX2	1
BP	GO:0097048	dendritic cell apoptotic process	1/221	11/17913	0.127676	0.515865	0.472949	CCR7	1
BP	GO:1902093	positive regulation of flagellated sperm motility	1/221	11/17913	0.127676	0.515865	0.472949	TACR3	1
BP	GO:1902224	ketone body metabolic process	1/221	11/17913	0.127676	0.515865	0.472949	HMGCLL1	1
BP	GO:1904424	regulation of GTP binding	1/221	11/17913	0.127676	0.515865	0.472949	RIPOR2	1
BP	GO:2000668	regulation of dendritic cell apoptotic process	1/221	11/17913	0.127676	0.515865	0.472949	CCR7	1
BP	GO:0034330	cell junction organization	6/221	277/17913	0.128831	0.515865	0.472949	ACTN2/SH3BP1/HIPK1/GREM1/CADM2/PRTN3	6
BP	GO:0018107	peptidyl-threonine phosphorylation	3/221	101/17913	0.129119	0.515865	0.472949	ACVR1B/CAB39/PRKCB	3
BP	GO:1905269	positive regulation of chromatin organization	3/221	101/17913	0.129119	0.515865	0.472949	MYB/TET1/HIST1H1B	3
BP	GO:0030203	glycosaminoglycan metabolic process	4/221	157/17913	0.129701	0.515865	0.472949	HS3ST3B1/CHST5/NDST2/BGN	4
BP	GO:0006584	catecholamine metabolic process	2/221	51/17913	0.130645	0.515865	0.472949	DDC/TACR3	2
BP	GO:0009712	catechol-containing compound metabolic process	2/221	51/17913	0.130645	0.515865	0.472949	DDC/TACR3	2
BP	GO:0021545	cranial nerve development	2/221	51/17913	0.130645	0.515865	0.472949	PAX2/SLC1A3	2
BP	GO:0032613	interleukin-10 production	2/221	51/17913	0.130645	0.515865	0.472949	ISG15/DLL1	2
BP	GO:0045620	negative regulation of lymphocyte differentiation	2/221	51/17913	0.130645	0.515865	0.472949	CD74/ID2	2
BP	GO:0045668	negative regulation of osteoblast differentiation	2/221	51/17913	0.130645	0.515865	0.472949	ID2/GREM1	2
BP	GO:0050702	interleukin-1 beta secretion	2/221	51/17913	0.130645	0.515865	0.472949	CCR7/TMEM106A	2
BP	GO:0050885	neuromuscular process controlling balance	2/221	51/17913	0.130645	0.515865	0.472949	SLC1A3/CLN3	2
BP	GO:0051058	negative regulation of small GTPase mediated signal transduction	2/221	51/17913	0.130645	0.515865	0.472949	SH3BP1/RIPOR2	2
BP	GO:0097366	response to bronchodilator	2/221	51/17913	0.130645	0.515865	0.472949	RGS17/CCR7	2
BP	GO:0150077	regulation of neuroinflammatory response	2/221	51/17913	0.130645	0.515865	0.472949	NUPR1/C5AR1	2
BP	GO:0071103	DNA conformation change	6/221	279/17913	0.131992	0.515865	0.472949	TSPYL6/HIST1H1B/HIST1H3F/HIST1H3C/HIST1H4A/HIST1H4B	6
BP	GO:0001823	mesonephros development	3/221	103/17913	0.134688	0.515865	0.472949	PAX2/FGF8/GREM1	3
BP	GO:0032526	response to retinoic acid	3/221	103/17913	0.134688	0.515865	0.472949	WNT8B/PAX2/MYB	3
BP	GO:0002886	regulation of myeloid leukocyte mediated immunity	2/221	52/17913	0.134819	0.515865	0.472949	HMOX1/PTAFR	2
BP	GO:0007566	embryo implantation	2/221	52/17913	0.134819	0.515865	0.472949	ACVR1B/NODAL	2
BP	GO:0021879	forebrain neuron differentiation	2/221	52/17913	0.134819	0.515865	0.472949	LHX5/FGF8	2
BP	GO:0048747	muscle fiber development	2/221	52/17913	0.134819	0.515865	0.472949	RIPOR2/KEL	2
BP	GO:0046661	male sex differentiation	4/221	160/17913	0.136241	0.515865	0.472949	FGF8/HOXD13/HSD17B3/NUPR1	4
BP	GO:0050868	negative regulation of T cell activation	3/221	104/17913	0.137503	0.515865	0.472949	CD74/RIPOR2/LRRC32	3
BP	GO:0000098	sulfur amino acid catabolic process	1/221	12/17913	0.138444	0.515865	0.472949	AGXT	1
BP	GO:0002093	auditory receptor cell morphogenesis	1/221	12/17913	0.138444	0.515865	0.472949	RIPOR2	1
BP	GO:0002863	positive regulation of inflammatory response to antigenic stimulus	1/221	12/17913	0.138444	0.515865	0.472949	CCR7	1
BP	GO:0002903	negative regulation of B cell apoptotic process	1/221	12/17913	0.138444	0.515865	0.472949	CD74	1
BP	GO:0003207	cardiac chamber formation	1/221	12/17913	0.138444	0.515865	0.472949	TBX2	1
BP	GO:0003334	keratinocyte development	1/221	12/17913	0.138444	0.515865	0.472949	CDSN	1
BP	GO:0006491	N-glycan processing	1/221	12/17913	0.138444	0.515865	0.472949	ST8SIA3	1
BP	GO:0007077	mitotic nuclear envelope disassembly	1/221	12/17913	0.138444	0.515865	0.472949	PRKCB	1
BP	GO:0009111	vitamin catabolic process	1/221	12/17913	0.138444	0.515865	0.472949	CYP4F11	1
BP	GO:0009886	post-embryonic animal morphogenesis	1/221	12/17913	0.138444	0.515865	0.472949	NKX2-3	1
BP	GO:0010960	magnesium ion homeostasis	1/221	12/17913	0.138444	0.515865	0.472949	KEL	1
BP	GO:0014889	muscle atrophy	1/221	12/17913	0.138444	0.515865	0.472949	GATM	1
BP	GO:0019374	galactolipid metabolic process	1/221	12/17913	0.138444	0.515865	0.472949	CLN3	1
BP	GO:0030208	dermatan sulfate biosynthetic process	1/221	12/17913	0.138444	0.515865	0.472949	BGN	1
BP	GO:0031115	negative regulation of microtubule polymerization	1/221	12/17913	0.138444	0.515865	0.472949	TUBB4A	1
BP	GO:0033004	negative regulation of mast cell activation	1/221	12/17913	0.138444	0.515865	0.472949	HMOX1	1
BP	GO:0035641	locomotory exploration behavior	1/221	12/17913	0.138444	0.515865	0.472949	DPP4	1
BP	GO:0035751	regulation of lysosomal lumen pH	1/221	12/17913	0.138444	0.515865	0.472949	CLN3	1
BP	GO:0042159	lipoprotein catabolic process	1/221	12/17913	0.138444	0.515865	0.472949	APOB	1
BP	GO:0042416	dopamine biosynthetic process	1/221	12/17913	0.138444	0.515865	0.472949	DDC	1
BP	GO:0042487	regulation of odontogenesis of dentin-containing tooth	1/221	12/17913	0.138444	0.515865	0.472949	FGF8	1
BP	GO:0042738	exogenous drug catabolic process	1/221	12/17913	0.138444	0.515865	0.472949	CYP2B6	1
BP	GO:0043301	negative regulation of leukocyte degranulation	1/221	12/17913	0.138444	0.515865	0.472949	HMOX1	1
BP	GO:0045346	regulation of MHC class II biosynthetic process	1/221	12/17913	0.138444	0.515865	0.472949	TMEM106A	1
BP	GO:0045410	positive regulation of interleukin-6 biosynthetic process	1/221	12/17913	0.138444	0.515865	0.472949	PTAFR	1
BP	GO:0046689	response to mercury ion	1/221	12/17913	0.138444	0.515865	0.472949	PGAM2	1
BP	GO:0048172	regulation of short-term neuronal synaptic plasticity	1/221	12/17913	0.138444	0.515865	0.472949	SLC8A2	1
BP	GO:0060081	membrane hyperpolarization	1/221	12/17913	0.138444	0.515865	0.472949	KCNQ3	1
BP	GO:0060391	positive regulation of SMAD protein signal transduction	1/221	12/17913	0.138444	0.515865	0.472949	NODAL	1
BP	GO:0060394	negative regulation of pathway-restricted SMAD protein phosphorylation	1/221	12/17913	0.138444	0.515865	0.472949	GREM1	1
BP	GO:0070307	lens fiber cell development	1/221	12/17913	0.138444	0.515865	0.472949	FRS2	1
BP	GO:0070986	left/right axis specification	1/221	12/17913	0.138444	0.515865	0.472949	DLL1	1
BP	GO:0072044	collecting duct development	1/221	12/17913	0.138444	0.515865	0.472949	PAX2	1
BP	GO:0072178	nephric duct morphogenesis	1/221	12/17913	0.138444	0.515865	0.472949	PAX2	1
BP	GO:0098712	L-glutamate import across plasma membrane	1/221	12/17913	0.138444	0.515865	0.472949	SLC1A3	1
BP	GO:0098962	regulation of postsynaptic neurotransmitter receptor activity	1/221	12/17913	0.138444	0.515865	0.472949	CACNG4	1
BP	GO:1902337	regulation of apoptotic process involved in morphogenesis	1/221	12/17913	0.138444	0.515865	0.472949	PAX2	1
BP	GO:1902563	regulation of neutrophil activation	1/221	12/17913	0.138444	0.515865	0.472949	PTAFR	1
BP	GO:1902947	regulation of tau-protein kinase activity	1/221	12/17913	0.138444	0.515865	0.472949	C5AR1	1
BP	GO:2000341	regulation of chemokine (C-X-C motif) ligand 2 production	1/221	12/17913	0.138444	0.515865	0.472949	CD74	1
BP	GO:2001053	regulation of mesenchymal cell apoptotic process	1/221	12/17913	0.138444	0.515865	0.472949	PAX2	1
BP	GO:0003018	vascular process in circulatory system	4/221	161/17913	0.138451	0.515865	0.472949	HMOX1/PTAFR/KEL/C2CD4A	4
BP	GO:0006022	aminoglycan metabolic process	4/221	161/17913	0.138451	0.515865	0.472949	HS3ST3B1/CHST5/NDST2/BGN	4
BP	GO:0072507	divalent inorganic cation homeostasis	8/221	412/17913	0.138466	0.515865	0.472949	GIPR/ADCYAP1R1/SLC8A2/CCR7/PRKCB/CXCL11/KEL/CLN3	8
BP	GO:0006336	DNA replication-independent nucleosome assembly	2/221	53/17913	0.139022	0.515865	0.472949	HIST1H4A/HIST1H4B	2
BP	GO:0006968	cellular defense response	2/221	53/17913	0.139022	0.515865	0.472949	NCF2/C5AR1	2
BP	GO:0016233	telomere capping	2/221	53/17913	0.139022	0.515865	0.472949	HIST1H4A/HIST1H4B	2
BP	GO:0030166	proteoglycan biosynthetic process	2/221	53/17913	0.139022	0.515865	0.472949	HS3ST3B1/BGN	2
BP	GO:0034724	DNA replication-independent nucleosome organization	2/221	53/17913	0.139022	0.515865	0.472949	HIST1H4A/HIST1H4B	2
BP	GO:0043551	regulation of phosphatidylinositol 3-kinase activity	2/221	53/17913	0.139022	0.515865	0.472949	SLA2/CCR7	2
BP	GO:0045747	positive regulation of Notch signaling pathway	2/221	53/17913	0.139022	0.515865	0.472949	MFNG/DLL1	2
BP	GO:0060113	inner ear receptor cell differentiation	2/221	53/17913	0.139022	0.515865	0.472949	RIPOR2/DLL1	2
BP	GO:0045444	fat cell differentiation	5/221	222/17913	0.140536	0.515865	0.472949	ID2/TRIM32/PRDM16/BSCL2/SLC2A4	5
BP	GO:0060627	regulation of vesicle-mediated transport	9/221	480/17913	0.140642	0.515865	0.472949	ACTN2/HMOX1/PRKCB/GREM1/LGI3/PTAFR/SLC2A4/PRTN3/DLL1	9
BP	GO:0042063	gliogenesis	6/221	285/17913	0.141697	0.515865	0.472949	PAX2/ID2/MYB/POU3F1/C5AR1/DLL1	6
BP	GO:0098542	defense response to other organism	9/221	481/17913	0.141885	0.515865	0.472949	IFI6/OASL/RTP4/IFI44L/IFI27/KLK7/IFNE/ISG15/C5AR1	9
BP	GO:0043279	response to alkaloid	3/221	106/17913	0.143193	0.515865	0.472949	CACNG4/DDC/TACR3	3
BP	GO:0002763	positive regulation of myeloid leukocyte differentiation	2/221	54/17913	0.143255	0.515865	0.472949	CD74/ID2	2
BP	GO:0010524	positive regulation of calcium ion transport into cytosol	2/221	54/17913	0.143255	0.515865	0.472949	ADCYAP1R1/CXCL11	2
BP	GO:0034508	centromere complex assembly	2/221	54/17913	0.143255	0.515865	0.472949	HIST1H4A/HIST1H4B	2
BP	GO:0046173	polyol biosynthetic process	2/221	54/17913	0.143255	0.515865	0.472949	ADCYAP1R1/PTAFR	2
BP	GO:0060760	positive regulation of response to cytokine stimulus	2/221	54/17913	0.143255	0.515865	0.472949	CD74/TRIM32	2
BP	GO:0061005	cell differentiation involved in kidney development	2/221	54/17913	0.143255	0.515865	0.472949	PAX2/GREM1	2
BP	GO:0070206	protein trimerization	2/221	54/17913	0.143255	0.515865	0.472949	CD74/C1QTNF6	2
BP	GO:0097755	positive regulation of blood vessel diameter	2/221	54/17913	0.143255	0.515865	0.472949	HMOX1/PTAFR	2
BP	GO:0099132	ATP hydrolysis coupled cation transmembrane transport	2/221	54/17913	0.143255	0.515865	0.472949	ATP6V0E2/ATP6AP1L	2
BP	GO:0009743	response to carbohydrate	5/221	224/17913	0.144306	0.515865	0.472949	GIPR/PAX2/APOB/EPHA5/PRKCB	5
BP	GO:0044706	multi-multicellular organism process	5/221	225/17913	0.146207	0.515865	0.472949	TLE6/ACVR1B/NODAL/PTAFR/PSG1	5
BP	GO:0060538	skeletal muscle organ development	4/221	165/17913	0.147432	0.515865	0.472949	RIPOR2/NUPR1/KEL/DLL1	4
BP	GO:1902275	regulation of chromatin organization	4/221	165/17913	0.147432	0.515865	0.472949	PADI2/MYB/TET1/HIST1H1B	4
BP	GO:0002066	columnar/cuboidal epithelial cell development	2/221	55/17913	0.147514	0.515865	0.472949	RIPOR2/DLL1	2
BP	GO:0003229	ventricular cardiac muscle tissue development	2/221	55/17913	0.147514	0.515865	0.472949	ID2/TNNT2	2
BP	GO:0009435	NAD biosynthetic process	2/221	55/17913	0.147514	0.515865	0.472949	KMO/PGAM2	2
BP	GO:0043486	histone exchange	2/221	55/17913	0.147514	0.515865	0.472949	HIST1H4A/HIST1H4B	2
BP	GO:0070936	protein K48-linked ubiquitination	2/221	55/17913	0.147514	0.515865	0.472949	IFI27/RNF152	2
BP	GO:0006664	glycolipid metabolic process	3/221	108/17913	0.148961	0.515865	0.472949	ST8SIA3/ENPP7/CLN3	3
BP	GO:0032411	positive regulation of transporter activity	3/221	108/17913	0.148961	0.515865	0.472949	CACNG4/ACTN2/PTAFR	3
BP	GO:0001967	suckling behavior	1/221	13/17913	0.149081	0.515865	0.472949	DACH1	1
BP	GO:0002864	regulation of acute inflammatory response to antigenic stimulus	1/221	13/17913	0.149081	0.515865	0.472949	CCR7	1
BP	GO:0003352	regulation of cilium movement	1/221	13/17913	0.149081	0.515865	0.472949	TTLL6	1
BP	GO:0009084	glutamine family amino acid biosynthetic process	1/221	13/17913	0.149081	0.515865	0.472949	SLC1A3	1
BP	GO:0010763	positive regulation of fibroblast migration	1/221	13/17913	0.149081	0.515865	0.472949	PAK3	1
BP	GO:0016114	terpenoid biosynthetic process	1/221	13/17913	0.149081	0.515865	0.472949	BCO1	1
BP	GO:0021554	optic nerve development	1/221	13/17913	0.149081	0.515865	0.472949	PAX2	1
BP	GO:0021984	adenohypophysis development	1/221	13/17913	0.149081	0.515865	0.472949	FGF8	1
BP	GO:0030205	dermatan sulfate metabolic process	1/221	13/17913	0.149081	0.515865	0.472949	BGN	1
BP	GO:0030836	positive regulation of actin filament depolymerization	1/221	13/17913	0.149081	0.515865	0.472949	ACTN2	1
BP	GO:0031054	pre-miRNA processing	1/221	13/17913	0.149081	0.515865	0.472949	AGO1	1
BP	GO:0031223	auditory behavior	1/221	13/17913	0.149081	0.515865	0.472949	SLC1A3	1
BP	GO:0032536	regulation of cell projection size	1/221	13/17913	0.149081	0.515865	0.472949	KEL	1
BP	GO:0034331	cell junction maintenance	1/221	13/17913	0.149081	0.515865	0.472949	PRTN3	1
BP	GO:0034370	triglyceride-rich lipoprotein particle remodeling	1/221	13/17913	0.149081	0.515865	0.472949	APOB	1
BP	GO:0034374	low-density lipoprotein particle remodeling	1/221	13/17913	0.149081	0.515865	0.472949	APOB	1
BP	GO:0042538	hyperosmotic salinity response	1/221	13/17913	0.149081	0.515865	0.472949	TACR3	1
BP	GO:0042574	retinal metabolic process	1/221	13/17913	0.149081	0.515865	0.472949	BCO1	1
BP	GO:0045073	regulation of chemokine biosynthetic process	1/221	13/17913	0.149081	0.515865	0.472949	HMOX1	1
BP	GO:0045342	MHC class II biosynthetic process	1/221	13/17913	0.149081	0.515865	0.472949	TMEM106A	1
BP	GO:0045820	negative regulation of glycolytic process	1/221	13/17913	0.149081	0.515865	0.472949	NUPR1	1
BP	GO:0048715	negative regulation of oligodendrocyte differentiation	1/221	13/17913	0.149081	0.515865	0.472949	ID2	1
BP	GO:0050872	white fat cell differentiation	1/221	13/17913	0.149081	0.515865	0.472949	PRDM16	1
BP	GO:0051085	chaperone cofactor-dependent protein refolding	1/221	13/17913	0.149081	0.515865	0.472949	CD74	1
BP	GO:0051938	L-glutamate import	1/221	13/17913	0.149081	0.515865	0.472949	SLC1A3	1
BP	GO:0061430	bone trabecula morphogenesis	1/221	13/17913	0.149081	0.515865	0.472949	GREM1	1
BP	GO:0061469	regulation of type B pancreatic cell proliferation	1/221	13/17913	0.149081	0.515865	0.472949	NUPR1	1
BP	GO:0061888	regulation of astrocyte activation	1/221	13/17913	0.149081	0.515865	0.472949	C5AR1	1
BP	GO:0070208	protein heterotrimerization	1/221	13/17913	0.149081	0.515865	0.472949	C1QTNF6	1
BP	GO:0070863	positive regulation of protein exit from endoplasmic reticulum	1/221	13/17913	0.149081	0.515865	0.472949	SLC35D3	1
BP	GO:0071285	cellular response to lithium ion	1/221	13/17913	0.149081	0.515865	0.472949	ID2	1
BP	GO:0072182	regulation of nephron tubule epithelial cell differentiation	1/221	13/17913	0.149081	0.515865	0.472949	PAX2	1
BP	GO:0090308	regulation of methylation-dependent chromatin silencing	1/221	13/17913	0.149081	0.515865	0.472949	TET1	1
BP	GO:0090594	inflammatory response to wounding	1/221	13/17913	0.149081	0.515865	0.472949	HMOX1	1
BP	GO:0097152	mesenchymal cell apoptotic process	1/221	13/17913	0.149081	0.515865	0.472949	PAX2	1
BP	GO:1902902	negative regulation of autophagosome assembly	1/221	13/17913	0.149081	0.515865	0.472949	NUPR1	1
BP	GO:1904251	regulation of bile acid metabolic process	1/221	13/17913	0.149081	0.515865	0.472949	FGF19	1
BP	GO:2000194	regulation of female gonad development	1/221	13/17913	0.149081	0.515865	0.472949	NUPR1	1
BP	GO:0071398	cellular response to fatty acid	2/221	56/17913	0.151798	0.520082	0.476815	APOB/PTAFR	2
BP	GO:1900449	regulation of glutamate receptor signaling pathway	2/221	56/17913	0.151798	0.520082	0.476815	CACNG4/ACTN2	2
BP	GO:1901880	negative regulation of protein depolymerization	2/221	56/17913	0.151798	0.520082	0.476815	SPTB/PLEKHH2	2
BP	GO:0034968	histone lysine methylation	3/221	109/17913	0.151873	0.520082	0.476815	MYB/PRDM16/HIST1H1B	3
BP	GO:1903509	liposaccharide metabolic process	3/221	109/17913	0.151873	0.520082	0.476815	ST8SIA3/ENPP7/CLN3	3
BP	GO:1903522	regulation of blood circulation	6/221	292/17913	0.153424	0.520082	0.476815	CACNG4/SLC8A2/TNNT2/TBX2/PTAFR/TACR3	6
BP	GO:0035725	sodium ion transmembrane transport	3/221	110/17913	0.154803	0.520082	0.476815	TRPM5/SLC8A2/SLC24A2	3
BP	GO:0050864	regulation of B cell activation	3/221	110/17913	0.154803	0.520082	0.476815	CD74/SLA2/ID2	3
BP	GO:0015849	organic acid transport	6/221	293/17913	0.155134	0.520082	0.476815	SLC1A3/KMO/SLC16A7/AGXT/SLC26A9/CLN3	6
BP	GO:0046942	carboxylic acid transport	6/221	293/17913	0.155134	0.520082	0.476815	SLC1A3/KMO/SLC16A7/AGXT/SLC26A9/CLN3	6
BP	GO:0006879	cellular iron ion homeostasis	2/221	57/17913	0.156107	0.520082	0.476815	CP/HMOX1	2
BP	GO:0035904	aorta development	2/221	57/17913	0.156107	0.520082	0.476815	FGF8/TBX2	2
BP	GO:0045604	regulation of epidermal cell differentiation	2/221	57/17913	0.156107	0.520082	0.476815	DLL1/CDSN	2
BP	GO:0046686	response to cadmium ion	2/221	57/17913	0.156107	0.520082	0.476815	HMOX1/MT1F	2
BP	GO:0050909	sensory perception of taste	2/221	57/17913	0.156107	0.520082	0.476815	TRPM5/RTP4	2
BP	GO:0090183	regulation of kidney development	2/221	57/17913	0.156107	0.520082	0.476815	PAX2/GREM1	2
BP	GO:1901342	regulation of vasculature development	8/221	425/17913	0.156308	0.520082	0.476815	AGO1/HMOX1/NODAL/HIPK1/PRKCB/GREM1/C5AR1/DLL1	8
BP	GO:0006479	protein methylation	4/221	169/17913	0.156633	0.520082	0.476815	MYB/TET1/PRDM16/HIST1H1B	4
BP	GO:0008213	protein alkylation	4/221	169/17913	0.156633	0.520082	0.476815	MYB/TET1/PRDM16/HIST1H1B	4
BP	GO:0022408	negative regulation of cell-cell adhesion	4/221	169/17913	0.156633	0.520082	0.476815	CD74/RIPOR2/LRRC32/CDSN	4
BP	GO:1904019	epithelial cell apoptotic process	3/221	111/17913	0.15775	0.520082	0.476815	HMOX1/HIPK1/NUPR1	3
BP	GO:0043010	camera-type eye development	6/221	295/17913	0.158579	0.520082	0.476815	PAX2/TBX2/HIPK1/FRS2/LCTL/DLL1	6
BP	GO:0001959	regulation of cytokine-mediated signaling pathway	4/221	170/17913	0.158967	0.520082	0.476815	CD74/PADI2/TRIM32/HIPK1	4
BP	GO:0001771	immunological synapse formation	1/221	14/17913	0.159587	0.520082	0.476815	CCR7	1
BP	GO:0006825	copper ion transport	1/221	14/17913	0.159587	0.520082	0.476815	CP	1
BP	GO:0010885	regulation of cholesterol storage	1/221	14/17913	0.159587	0.520082	0.476815	APOB	1
BP	GO:0010935	regulation of macrophage cytokine production	1/221	14/17913	0.159587	0.520082	0.476815	CD74	1
BP	GO:0014048	regulation of glutamate secretion	1/221	14/17913	0.159587	0.520082	0.476815	KMO	1
BP	GO:0014854	response to inactivity	1/221	14/17913	0.159587	0.520082	0.476815	FBXO32	1
BP	GO:0019883	antigen processing and presentation of endogenous antigen	1/221	14/17913	0.159587	0.520082	0.476815	CD74	1
BP	GO:0021527	spinal cord association neuron differentiation	1/221	14/17913	0.159587	0.520082	0.476815	LHX5	1
BP	GO:0030207	chondroitin sulfate catabolic process	1/221	14/17913	0.159587	0.520082	0.476815	BGN	1
BP	GO:0032780	negative regulation of ATPase activity	1/221	14/17913	0.159587	0.520082	0.476815	TNNT2	1
BP	GO:0035589	G protein-coupled purinergic nucleotide receptor signaling pathway	1/221	14/17913	0.159587	0.520082	0.476815	PTAFR	1
BP	GO:0038166	angiotensin-activated signaling pathway	1/221	14/17913	0.159587	0.520082	0.476815	ACTN2	1
BP	GO:0042033	chemokine biosynthetic process	1/221	14/17913	0.159587	0.520082	0.476815	HMOX1	1
BP	GO:0045198	establishment of epithelial cell apical/basal polarity	1/221	14/17913	0.159587	0.520082	0.476815	SH3BP1	1
BP	GO:0045651	positive regulation of macrophage differentiation	1/221	14/17913	0.159587	0.520082	0.476815	ID2	1
BP	GO:0046459	short-chain fatty acid metabolic process	1/221	14/17913	0.159587	0.520082	0.476815	MMAA	1
BP	GO:0046851	negative regulation of bone remodeling	1/221	14/17913	0.159587	0.520082	0.476815	GREM1	1
BP	GO:0048368	lateral mesoderm development	1/221	14/17913	0.159587	0.520082	0.476815	NODAL	1
BP	GO:0050755	chemokine metabolic process	1/221	14/17913	0.159587	0.520082	0.476815	HMOX1	1
BP	GO:0050862	positive regulation of T cell receptor signaling pathway	1/221	14/17913	0.159587	0.520082	0.476815	CCR7	1
BP	GO:0060049	regulation of protein glycosylation	1/221	14/17913	0.159587	0.520082	0.476815	FKTN	1
BP	GO:0060261	positive regulation of transcription initiation from RNA polymerase II promoter	1/221	14/17913	0.159587	0.520082	0.476815	HNF1A	1
BP	GO:0072216	positive regulation of metanephros development	1/221	14/17913	0.159587	0.520082	0.476815	PAX2	1
BP	GO:0072567	chemokine (C-X-C motif) ligand 2 production	1/221	14/17913	0.159587	0.520082	0.476815	CD74	1
BP	GO:0099171	presynaptic modulation of chemical synaptic transmission	1/221	14/17913	0.159587	0.520082	0.476815	PRKCB	1
BP	GO:1901626	regulation of postsynaptic membrane organization	1/221	14/17913	0.159587	0.520082	0.476815	RAPSN	1
BP	GO:1902570	protein localization to nucleolus	1/221	14/17913	0.159587	0.520082	0.476815	PINX1	1
BP	GO:1903054	negative regulation of extracellular matrix organization	1/221	14/17913	0.159587	0.520082	0.476815	DPP4	1
BP	GO:1903540	establishment of protein localization to postsynaptic membrane	1/221	14/17913	0.159587	0.520082	0.476815	RAPSN	1
BP	GO:1904748	regulation of apoptotic process involved in development	1/221	14/17913	0.159587	0.520082	0.476815	PAX2	1
BP	GO:0043903	regulation of symbiosis, encompassing mutualism through parasitism	5/221	232/17913	0.159812	0.520082	0.476815	CD74/TRIM32/OASL/IFI27/ISG15	5
BP	GO:0051258	protein polymerization	5/221	232/17913	0.159812	0.520082	0.476815	SPTB/PAK3/TUBB4A/CCR7/CDC42EP5	5
BP	GO:0042490	mechanoreceptor differentiation	2/221	58/17913	0.160439	0.520766	0.477443	RIPOR2/DLL1	2
BP	GO:0030218	erythrocyte differentiation	3/221	112/17913	0.160715	0.520766	0.477443	ID2/ACVR1B/ISG15	3
BP	GO:1903510	mucopolysaccharide metabolic process	3/221	112/17913	0.160715	0.520766	0.477443	CHST5/NDST2/BGN	3
BP	GO:1903828	negative regulation of cellular protein localization	3/221	112/17913	0.160715	0.520766	0.477443	ACTN2/RIPOR2/LEPROT	3
BP	GO:0043433	negative regulation of DNA-binding transcription factor activity	4/221	171/17913	0.161313	0.52151	0.478125	HMOX1/ID2/MXI1/NUPR1	4
BP	GO:0071375	cellular response to peptide hormone stimulus	6/221	297/17913	0.162057	0.52151	0.478125	ACTN2/TSHR/PRKCB/ATP6V0E2/SLC2A4/LEPROT	6
BP	GO:0015711	organic anion transport	8/221	430/17913	0.163451	0.52151	0.478125	SLC1A3/KMO/SLC16A7/AGXT/SLC26A9/HBA2/HBA1/CLN3	8
BP	GO:0048660	regulation of smooth muscle cell proliferation	4/221	172/17913	0.163672	0.52151	0.478125	HMOX1/ID2/MYB/PTAFR	4
BP	GO:0046717	acid secretion	3/221	113/17913	0.163697	0.52151	0.478125	SLC1A3/KMO/AGXT	3
BP	GO:0032984	protein-containing complex disassembly	6/221	298/17913	0.163809	0.52151	0.478125	SPTB/WNT8B/ACTN2/SH3BP1/PLEKHH2/CLN3	6
BP	GO:0010656	negative regulation of muscle cell apoptotic process	2/221	59/17913	0.164794	0.52151	0.478125	HMOX1/NUPR1	2
BP	GO:0032272	negative regulation of protein polymerization	2/221	59/17913	0.164794	0.52151	0.478125	SPTB/TUBB4A	2
BP	GO:0034394	protein localization to cell surface	2/221	59/17913	0.164794	0.52151	0.478125	ACTN2/LEPROT	2
BP	GO:0045071	negative regulation of viral genome replication	2/221	59/17913	0.164794	0.52151	0.478125	OASL/ISG15	2
BP	GO:0051897	positive regulation of protein kinase B signaling	4/221	173/17913	0.166043	0.52151	0.478125	FGF8/CCR7/FGF19/FRS2	4
BP	GO:0042866	pyruvate biosynthetic process	3/221	114/17913	0.166696	0.52151	0.478125	PGAM2/AGXT/NUPR1	3
BP	GO:0016042	lipid catabolic process	6/221	300/17913	0.167336	0.52151	0.478125	APOB/CYP39A1/MMAA/PLD4/BSCL2/ENPP7	6
BP	GO:0023061	signal release	8/221	433/17913	0.167809	0.52151	0.478125	GIPR/KMO/MYB/HNF1A/ILDR1/EPHA5/PRKCB/DPP4	8
BP	GO:0048659	smooth muscle cell proliferation	4/221	174/17913	0.168427	0.52151	0.478125	HMOX1/ID2/MYB/PTAFR	4
BP	GO:0006898	receptor-mediated endocytosis	6/221	301/17913	0.169112	0.52151	0.478125	APOB/GREM1/HBA2/DLL1/HBA1/CLN3	6
BP	GO:0046879	hormone secretion	6/221	301/17913	0.169112	0.52151	0.478125	GIPR/MYB/HNF1A/ILDR1/EPHA5/DPP4	6
BP	GO:0006940	regulation of smooth muscle contraction	2/221	60/17913	0.169169	0.52151	0.478125	PTAFR/TACR3	2
BP	GO:0010676	positive regulation of cellular carbohydrate metabolic process	2/221	60/17913	0.169169	0.52151	0.478125	ADCYAP1R1/PTAFR	2
BP	GO:0016266	O-glycan processing	2/221	60/17913	0.169169	0.52151	0.478125	GALNT13/MUC17	2
BP	GO:0050701	interleukin-1 secretion	2/221	60/17913	0.169169	0.52151	0.478125	CCR7/TMEM106A	2
BP	GO:2000401	regulation of lymphocyte migration	2/221	60/17913	0.169169	0.52151	0.478125	RIPOR2/PADI2	2
BP	GO:0019751	polyol metabolic process	3/221	115/17913	0.16971	0.52151	0.478125	ADCYAP1R1/PLD4/PTAFR	3
BP	GO:0042471	ear morphogenesis	3/221	115/17913	0.16971	0.52151	0.478125	PAX2/FGF8/RIPOR2	3
BP	GO:0072329	monocarboxylic acid catabolic process	3/221	115/17913	0.16971	0.52151	0.478125	CYP39A1/MMAA/AGXT	3
BP	GO:0001829	trophectodermal cell differentiation	1/221	15/17913	0.169963	0.52151	0.478125	NODAL	1
BP	GO:0006534	cysteine metabolic process	1/221	15/17913	0.169963	0.52151	0.478125	AGXT	1
BP	GO:0007351	tripartite regional subdivision	1/221	15/17913	0.169963	0.52151	0.478125	FRS2	1
BP	GO:0007638	mechanosensory behavior	1/221	15/17913	0.169963	0.52151	0.478125	SLC1A3	1
BP	GO:0008595	anterior/posterior axis specification, embryo	1/221	15/17913	0.169963	0.52151	0.478125	FRS2	1
BP	GO:0009070	serine family amino acid biosynthetic process	1/221	15/17913	0.169963	0.52151	0.478125	AGXT	1
BP	GO:0010759	positive regulation of macrophage chemotaxis	1/221	15/17913	0.169963	0.52151	0.478125	C5AR1	1
BP	GO:0014874	response to stimulus involved in regulation of muscle adaptation	1/221	15/17913	0.169963	0.52151	0.478125	FBXO32	1
BP	GO:0030812	negative regulation of nucleotide catabolic process	1/221	15/17913	0.169963	0.52151	0.478125	NUPR1	1
BP	GO:0033689	negative regulation of osteoblast proliferation	1/221	15/17913	0.169963	0.52151	0.478125	GREM1	1
BP	GO:0034349	glial cell apoptotic process	1/221	15/17913	0.169963	0.52151	0.478125	DLL1	1
BP	GO:0042362	fat-soluble vitamin biosynthetic process	1/221	15/17913	0.169963	0.52151	0.478125	BCO1	1
BP	GO:0042994	cytoplasmic sequestering of transcription factor	1/221	15/17913	0.169963	0.52151	0.478125	MXI1	1
BP	GO:0043518	negative regulation of DNA damage response, signal transduction by p53 class mediator	1/221	15/17913	0.169963	0.52151	0.478125	CD74	1
BP	GO:0043931	ossification involved in bone maturation	1/221	15/17913	0.169963	0.52151	0.478125	GREM1	1
BP	GO:0045475	locomotor rhythm	1/221	15/17913	0.169963	0.52151	0.478125	ID2	1
BP	GO:0050651	dermatan sulfate proteoglycan biosynthetic process	1/221	15/17913	0.169963	0.52151	0.478125	BGN	1
BP	GO:0051198	negative regulation of coenzyme metabolic process	1/221	15/17913	0.169963	0.52151	0.478125	NUPR1	1
BP	GO:0060766	negative regulation of androgen receptor signaling pathway	1/221	15/17913	0.169963	0.52151	0.478125	NODAL	1
BP	GO:0071599	otic vesicle development	1/221	15/17913	0.169963	0.52151	0.478125	FGF8	1
BP	GO:0072075	metanephric mesenchyme development	1/221	15/17913	0.169963	0.52151	0.478125	PAX2	1
BP	GO:0072160	nephron tubule epithelial cell differentiation	1/221	15/17913	0.169963	0.52151	0.478125	PAX2	1
BP	GO:0090192	regulation of glomerulus development	1/221	15/17913	0.169963	0.52151	0.478125	PAX2	1
BP	GO:1900451	positive regulation of glutamate receptor signaling pathway	1/221	15/17913	0.169963	0.52151	0.478125	CACNG4	1
BP	GO:1901741	positive regulation of myoblast fusion	1/221	15/17913	0.169963	0.52151	0.478125	RIPOR2	1
BP	GO:1902187	negative regulation of viral release from host cell	1/221	15/17913	0.169963	0.52151	0.478125	TRIM32	1
BP	GO:1904262	negative regulation of TORC1 signaling	1/221	15/17913	0.169963	0.52151	0.478125	RNF152	1
BP	GO:0015893	drug transport	4/221	175/17913	0.170823	0.523613	0.480053	SLC1A3/TCN1/HBA2/HBA1	4
BP	GO:0031929	TOR signaling	3/221	116/17913	0.172741	0.528243	0.484297	DEPTOR/RHEBL1/RNF152	3
BP	GO:0048736	appendage development	4/221	176/17913	0.173231	0.528243	0.484297	FGF8/TBX2/HOXD13/GREM1	4
BP	GO:0060173	limb development	4/221	176/17913	0.173231	0.528243	0.484297	FGF8/TBX2/HOXD13/GREM1	4
BP	GO:0010803	regulation of tumor necrosis factor-mediated signaling pathway	2/221	61/17913	0.173563	0.528243	0.484297	TRIM32/HIPK1	2
BP	GO:0042733	embryonic digit morphogenesis	2/221	61/17913	0.173563	0.528243	0.484297	TBX2/HOXD13	2
BP	GO:0051453	regulation of intracellular pH	2/221	61/17913	0.173563	0.528243	0.484297	ATP6V0E2/CLN3	2
BP	GO:2000243	positive regulation of reproductive process	2/221	61/17913	0.173563	0.528243	0.484297	ACVR1B/PTAFR	2
BP	GO:0002705	positive regulation of leukocyte mediated immunity	3/221	117/17913	0.175786	0.531795	0.487554	PTAFR/C17orf99/NCR3	3
BP	GO:0015800	acidic amino acid transport	2/221	62/17913	0.177976	0.531795	0.487554	SLC1A3/KMO	2
BP	GO:0043550	regulation of lipid kinase activity	2/221	62/17913	0.177976	0.531795	0.487554	SLA2/CCR7	2
BP	GO:1901016	regulation of potassium ion transmembrane transporter activity	2/221	62/17913	0.177976	0.531795	0.487554	ACTN2/CAB39	2
BP	GO:0030072	peptide hormone secretion	5/221	241/17913	0.178026	0.531795	0.487554	GIPR/HNF1A/ILDR1/EPHA5/DPP4	5
BP	GO:0097237	cellular response to toxic substance	5/221	241/17913	0.178026	0.531795	0.487554	PAX2/HMOX1/MYB/HBA2/HBA1	5
BP	GO:0002697	regulation of immune effector process	8/221	441/17913	0.179687	0.531795	0.487554	CD74/HMOX1/MYB/KLK7/PTAFR/C17orf99/C5AR1/NCR3	8
BP	GO:0002830	positive regulation of type 2 immune response	1/221	16/17913	0.180212	0.531795	0.487554	CD74	1
BP	GO:0010878	cholesterol storage	1/221	16/17913	0.180212	0.531795	0.487554	APOB	1
BP	GO:0010934	macrophage cytokine production	1/221	16/17913	0.180212	0.531795	0.487554	CD74	1
BP	GO:0030397	membrane disassembly	1/221	16/17913	0.180212	0.531795	0.487554	PRKCB	1
BP	GO:0033262	regulation of nuclear cell cycle DNA replication	1/221	16/17913	0.180212	0.531795	0.487554	DACH1	1
BP	GO:0033631	cell-cell adhesion mediated by integrin	1/221	16/17913	0.180212	0.531795	0.487554	DPP4	1
BP	GO:0043649	dicarboxylic acid catabolic process	1/221	16/17913	0.180212	0.531795	0.487554	ALDH1L2	1
BP	GO:0050655	dermatan sulfate proteoglycan metabolic process	1/221	16/17913	0.180212	0.531795	0.487554	BGN	1
BP	GO:0051081	nuclear envelope disassembly	1/221	16/17913	0.180212	0.531795	0.487554	PRKCB	1
BP	GO:0051571	positive regulation of histone H3-K4 methylation	1/221	16/17913	0.180212	0.531795	0.487554	MYB	1
BP	GO:0060117	auditory receptor cell development	1/221	16/17913	0.180212	0.531795	0.487554	RIPOR2	1
BP	GO:0070293	renal absorption	1/221	16/17913	0.180212	0.531795	0.487554	HNF1A	1
BP	GO:0072148	epithelial cell fate commitment	1/221	16/17913	0.180212	0.531795	0.487554	DLL1	1
BP	GO:0072176	nephric duct development	1/221	16/17913	0.180212	0.531795	0.487554	PAX2	1
BP	GO:0072189	ureter development	1/221	16/17913	0.180212	0.531795	0.487554	PAX2	1
BP	GO:0072224	metanephric glomerulus development	1/221	16/17913	0.180212	0.531795	0.487554	PAX2	1
BP	GO:0090335	regulation of brown fat cell differentiation	1/221	16/17913	0.180212	0.531795	0.487554	PRDM16	1
BP	GO:0090493	catecholamine uptake	1/221	16/17913	0.180212	0.531795	0.487554	SLC6A2	1
BP	GO:1900221	regulation of amyloid-beta clearance	1/221	16/17913	0.180212	0.531795	0.487554	C5AR1	1
BP	GO:1900242	regulation of synaptic vesicle endocytosis	1/221	16/17913	0.180212	0.531795	0.487554	SLC2A4	1
BP	GO:1901317	regulation of flagellated sperm motility	1/221	16/17913	0.180212	0.531795	0.487554	TACR3	1
BP	GO:1902166	negative regulation of intrinsic apoptotic signaling pathway in response to DNA damage by p53 class mediator	1/221	16/17913	0.180212	0.531795	0.487554	CD74	1
BP	GO:1902358	sulfate transmembrane transport	1/221	16/17913	0.180212	0.531795	0.487554	SLC26A9	1
BP	GO:2001170	negative regulation of ATP biosynthetic process	1/221	16/17913	0.180212	0.531795	0.487554	NUPR1	1
BP	GO:0006575	cellular modified amino acid metabolic process	4/221	179/17913	0.180524	0.532192	0.487918	CHAC1/EGLN3/ALDH1L2/GATM	4
BP	GO:0006979	response to oxidative stress	8/221	442/17913	0.181197	0.533037	0.488693	PAX2/HMOX1/FGF8/NCF2/MYB/CCR7/HBA2/HBA1	8
BP	GO:0033002	muscle cell proliferation	5/221	243/17913	0.182177	0.533037	0.488693	HMOX1/ID2/MYB/TBX2/PTAFR	5
BP	GO:0071383	cellular response to steroid hormone stimulus	5/221	243/17913	0.182177	0.533037	0.488693	RHOXF1/PADI2/NODAL/FBXO32/PAQR8	5
BP	GO:0048545	response to steroid hormone	7/221	375/17913	0.182381	0.533037	0.488693	RHOXF1/PADI2/NODAL/FBXO32/PTAFR/PAQR8/AGXT	7
BP	GO:0021872	forebrain generation of neurons	2/221	63/17913	0.182406	0.533037	0.488693	LHX5/FGF8	2
BP	GO:0042108	positive regulation of cytokine biosynthetic process	2/221	63/17913	0.182406	0.533037	0.488693	HMOX1/PTAFR	2
BP	GO:0043242	negative regulation of protein complex disassembly	2/221	63/17913	0.182406	0.533037	0.488693	SPTB/PLEKHH2	2
BP	GO:0045600	positive regulation of fat cell differentiation	2/221	63/17913	0.182406	0.533037	0.488693	ID2/PRDM16	2
BP	GO:0055025	positive regulation of cardiac muscle tissue development	2/221	63/17913	0.182406	0.533037	0.488693	TBX2/GREM1	2
BP	GO:0043902	positive regulation of multi-organism process	4/221	180/17913	0.182978	0.533671	0.489274	CD74/ACVR1B/KLK7/PTAFR	4
BP	GO:0050852	T cell receptor signaling pathway	4/221	180/17913	0.182978	0.533671	0.489274	PAK3/FYB1/CCR7/PVRIG	4
BP	GO:0001838	embryonic epithelial tube formation	3/221	120/17913	0.185012	0.536597	0.491956	PAX2/NODAL/GREM1	3
BP	GO:0019079	viral genome replication	3/221	120/17913	0.185012	0.536597	0.491956	OASL/IFI27/ISG15	3
BP	GO:0043401	steroid hormone mediated signaling pathway	4/221	181/17913	0.185443	0.536597	0.491956	RHOXF1/PADI2/NODAL/PAQR8	4
BP	GO:1905330	regulation of morphogenesis of an epithelium	4/221	181/17913	0.185443	0.536597	0.491956	PAX2/TBX2/HOXD13/GREM1	4
BP	GO:0040013	negative regulation of locomotion	7/221	377/17913	0.185705	0.536597	0.491956	HMOX1/RIPOR2/PADI2/TRIM32/NODAL/GREM1/DACH1	7
BP	GO:0019915	lipid storage	2/221	64/17913	0.186853	0.536597	0.491956	APOB/BSCL2	2
BP	GO:0046622	positive regulation of organ growth	2/221	64/17913	0.186853	0.536597	0.491956	FGF8/TBX2	2
BP	GO:0048663	neuron fate commitment	2/221	64/17913	0.186853	0.536597	0.491956	ID2/DLL1	2
BP	GO:0001819	positive regulation of cytokine production	8/221	446/17913	0.187295	0.536597	0.491956	CD74/HMOX1/MYB/TRIM32/CCR7/NODAL/PTAFR/C5AR1	8
BP	GO:0009914	hormone transport	6/221	311/17913	0.187296	0.536597	0.491956	GIPR/MYB/HNF1A/ILDR1/EPHA5/DPP4	6
BP	GO:0043901	negative regulation of multi-organism process	4/221	182/17913	0.187919	0.536597	0.491956	TRIM32/OASL/NODAL/ISG15	4
BP	GO:0046718	viral entry into host cell	3/221	121/17913	0.188116	0.536597	0.491956	CD74/ITGB7/DPP4	3
BP	GO:1903038	negative regulation of leukocyte cell-cell adhesion	3/221	121/17913	0.188116	0.536597	0.491956	CD74/RIPOR2/LRRC32	3
BP	GO:0001573	ganglioside metabolic process	1/221	17/17913	0.190336	0.536597	0.491956	ST8SIA3	1
BP	GO:0002902	regulation of B cell apoptotic process	1/221	17/17913	0.190336	0.536597	0.491956	CD74	1
BP	GO:0003198	epithelial to mesenchymal transition involved in endocardial cushion formation	1/221	17/17913	0.190336	0.536597	0.491956	FGF8	1
BP	GO:0006750	glutathione biosynthetic process	1/221	17/17913	0.190336	0.536597	0.491956	CHAC1	1
BP	GO:0007379	segment specification	1/221	17/17913	0.190336	0.536597	0.491956	DLL1	1
BP	GO:0008272	sulfate transport	1/221	17/17913	0.190336	0.536597	0.491956	SLC26A9	1
BP	GO:0010715	regulation of extracellular matrix disassembly	1/221	17/17913	0.190336	0.536597	0.491956	DPP4	1
BP	GO:0010744	positive regulation of macrophage derived foam cell differentiation	1/221	17/17913	0.190336	0.536597	0.491956	APOB	1
BP	GO:0017085	response to insecticide	1/221	17/17913	0.190336	0.536597	0.491956	DDC	1
BP	GO:0030502	negative regulation of bone mineralization	1/221	17/17913	0.190336	0.536597	0.491956	GREM1	1
BP	GO:0042268	regulation of cytolysis	1/221	17/17913	0.190336	0.536597	0.491956	PAX2	1
BP	GO:0042401	cellular biogenic amine biosynthetic process	1/221	17/17913	0.190336	0.536597	0.491956	DDC	1
BP	GO:0045056	transcytosis	1/221	17/17913	0.190336	0.536597	0.491956	PTAFR	1
BP	GO:0048535	lymph node development	1/221	17/17913	0.190336	0.536597	0.491956	NKX2-3	1
BP	GO:0048711	positive regulation of astrocyte differentiation	1/221	17/17913	0.190336	0.536597	0.491956	ID2	1
BP	GO:0051957	positive regulation of amino acid transport	1/221	17/17913	0.190336	0.536597	0.491956	KMO	1
BP	GO:0060644	mammary gland epithelial cell differentiation	1/221	17/17913	0.190336	0.536597	0.491956	ID2	1
BP	GO:0090185	negative regulation of kidney development	1/221	17/17913	0.190336	0.536597	0.491956	PAX2	1
BP	GO:1901071	glucosamine-containing compound metabolic process	1/221	17/17913	0.190336	0.536597	0.491956	CHST5	1
BP	GO:1904996	positive regulation of leukocyte adhesion to vascular endothelial cell	1/221	17/17913	0.190336	0.536597	0.491956	PTAFR	1
BP	GO:1905331	negative regulation of morphogenesis of an epithelium	1/221	17/17913	0.190336	0.536597	0.491956	TBX2	1
BP	GO:2000811	negative regulation of anoikis	1/221	17/17913	0.190336	0.536597	0.491956	CEACAM5	1
BP	GO:0060759	regulation of response to cytokine stimulus	4/221	183/17913	0.190405	0.536597	0.491956	CD74/PADI2/TRIM32/HIPK1	4
BP	GO:0060562	epithelial tube morphogenesis	6/221	313/17913	0.191023	0.536644	0.491999	PAX2/FGF8/TBX2/NODAL/GREM1/DLL1	6
BP	GO:0018022	peptidyl-lysine methylation	3/221	122/17913	0.191233	0.536644	0.491999	MYB/PRDM16/HIST1H1B	3
BP	GO:0035270	endocrine system development	3/221	122/17913	0.191233	0.536644	0.491999	GIPR/FGF8/DLL1	3
BP	GO:1902904	negative regulation of supramolecular fiber organization	3/221	122/17913	0.191233	0.536644	0.491999	SPTB/TUBB4A/PLEKHH2	3
BP	GO:0030641	regulation of cellular pH	2/221	65/17913	0.191314	0.536644	0.491999	ATP6V0E2/CLN3	2
BP	GO:0008016	regulation of heart contraction	5/221	249/17913	0.194842	0.543592	0.498369	CACNG4/SLC8A2/TNNT2/TBX2/TACR3	5
BP	GO:0002703	regulation of leukocyte mediated immunity	4/221	185/17913	0.19541	0.543592	0.498369	HMOX1/PTAFR/C17orf99/NCR3	4
BP	GO:0048839	inner ear development	4/221	185/17913	0.19541	0.543592	0.498369	PAX2/FGF8/RIPOR2/DLL1	4
BP	GO:0007218	neuropeptide signaling pathway	2/221	66/17913	0.19579	0.543592	0.498369	SORCS1/NPW	2
BP	GO:0043030	regulation of macrophage activation	2/221	66/17913	0.19579	0.543592	0.498369	CD74/C5AR1	2
BP	GO:1903672	positive regulation of sprouting angiogenesis	2/221	66/17913	0.19579	0.543592	0.498369	HMOX1/DLL1	2
BP	GO:2000573	positive regulation of DNA biosynthetic process	2/221	66/17913	0.19579	0.543592	0.498369	PAK3/GREM1	2
BP	GO:0008544	epidermis development	8/221	452/17913	0.196604	0.543592	0.498369	RIPOR2/ACVR1B/KLK7/KRT13/POU3F1/HRNR/DLL1/CDSN	8
BP	GO:0099601	regulation of neurotransmitter receptor activity	2/221	67/17913	0.200279	0.543592	0.498369	CACNG4/ACTN2	2
BP	GO:0006346	methylation-dependent chromatin silencing	1/221	18/17913	0.200334	0.543592	0.498369	TET1	1
BP	GO:0007271	synaptic transmission, cholinergic	1/221	18/17913	0.200334	0.543592	0.498369	RAPSN	1
BP	GO:0007274	neuromuscular synaptic transmission	1/221	18/17913	0.200334	0.543592	0.498369	RAPSN	1
BP	GO:0009309	amine biosynthetic process	1/221	18/17913	0.200334	0.543592	0.498369	DDC	1
BP	GO:0010832	negative regulation of myotube differentiation	1/221	18/17913	0.200334	0.543592	0.498369	CEACAM5	1
BP	GO:0021533	cell differentiation in hindbrain	1/221	18/17913	0.200334	0.543592	0.498369	LHX5	1
BP	GO:0030809	negative regulation of nucleotide biosynthetic process	1/221	18/17913	0.200334	0.543592	0.498369	NUPR1	1
BP	GO:0032693	negative regulation of interleukin-10 production	1/221	18/17913	0.200334	0.543592	0.498369	DLL1	1
BP	GO:0032793	positive regulation of CREB transcription factor activity	1/221	18/17913	0.200334	0.543592	0.498369	EPHA5	1
BP	GO:0035089	establishment of apical/basal cell polarity	1/221	18/17913	0.200334	0.543592	0.498369	SH3BP1	1
BP	GO:0035269	protein O-linked mannosylation	1/221	18/17913	0.200334	0.543592	0.498369	FKTN	1
BP	GO:0038083	peptidyl-tyrosine autophosphorylation	1/221	18/17913	0.200334	0.543592	0.498369	GREM1	1
BP	GO:0042789	mRNA transcription by RNA polymerase II	1/221	18/17913	0.200334	0.543592	0.498369	C5AR1	1
BP	GO:0044827	modulation by host of viral genome replication	1/221	18/17913	0.200334	0.543592	0.498369	IFI27	1
BP	GO:0048557	embryonic digestive tract morphogenesis	1/221	18/17913	0.200334	0.543592	0.498369	ID2	1
BP	GO:0051084	'de novo' posttranslational protein folding	1/221	18/17913	0.200334	0.543592	0.498369	CD74	1
BP	GO:0060749	mammary gland alveolus development	1/221	18/17913	0.200334	0.543592	0.498369	ID2	1
BP	GO:0061377	mammary gland lobule development	1/221	18/17913	0.200334	0.543592	0.498369	ID2	1
BP	GO:0070828	heterochromatin organization	1/221	18/17913	0.200334	0.543592	0.498369	PRDM16	1
BP	GO:0070977	bone maturation	1/221	18/17913	0.200334	0.543592	0.498369	GREM1	1
BP	GO:1900372	negative regulation of purine nucleotide biosynthetic process	1/221	18/17913	0.200334	0.543592	0.498369	NUPR1	1
BP	GO:1901739	regulation of myoblast fusion	1/221	18/17913	0.200334	0.543592	0.498369	RIPOR2	1
BP	GO:1902165	regulation of intrinsic apoptotic signaling pathway in response to DNA damage by p53 class mediator	1/221	18/17913	0.200334	0.543592	0.498369	CD74	1
BP	GO:2000311	regulation of AMPA receptor activity	1/221	18/17913	0.200334	0.543592	0.498369	CACNG4	1
BP	GO:0017157	regulation of exocytosis	4/221	187/17913	0.200455	0.543592	0.498369	HMOX1/PRKCB/LGI3/PTAFR	4
BP	GO:0007568	aging	6/221	318/17913	0.200462	0.543592	0.498369	PAX2/ID2/KMO/TBX2/DDC/TACR3	6
BP	GO:0035296	regulation of tube diameter	3/221	125/17913	0.200661	0.543592	0.498369	HMOX1/PTAFR/KEL	3
BP	GO:0046887	positive regulation of hormone secretion	3/221	125/17913	0.200661	0.543592	0.498369	GIPR/MYB/ILDR1	3
BP	GO:0097746	regulation of blood vessel diameter	3/221	125/17913	0.200661	0.543592	0.498369	HMOX1/PTAFR/KEL	3
BP	GO:0030010	establishment of cell polarity	3/221	126/17913	0.203828	0.545856	0.500445	SH3BP1/RIPOR2/CCR7	3
BP	GO:0060359	response to ammonium ion	3/221	126/17913	0.203828	0.545856	0.500445	CACNG4/PTAFR/TACR3	3
BP	GO:0071674	mononuclear cell migration	2/221	68/17913	0.20478	0.545856	0.500445	GREM1/C5AR1	2
BP	GO:1903524	positive regulation of blood circulation	2/221	68/17913	0.20478	0.545856	0.500445	PTAFR/TACR3	2
BP	GO:0006814	sodium ion transport	4/221	189/17913	0.205539	0.545856	0.500445	TRPM5/SLC8A2/SCN3A/SLC24A2	4
BP	GO:0046883	regulation of hormone secretion	5/221	254/17913	0.205626	0.545856	0.500445	GIPR/MYB/ILDR1/EPHA5/DPP4	5
BP	GO:0008202	steroid metabolic process	6/221	321/17913	0.206207	0.545856	0.500445	APOB/HSD17B3/CYP39A1/FGF19/SDR42E1/CYP2B6	6
BP	GO:0044272	sulfur compound biosynthetic process	4/221	190/17913	0.208095	0.545856	0.500445	CHAC1/CHST5/NDST2/BGN	4
BP	GO:0031110	regulation of microtubule polymerization or depolymerization	2/221	69/17913	0.209292	0.545856	0.500445	TUBB4A/SKA1	2
BP	GO:0033077	T cell differentiation in thymus	2/221	69/17913	0.209292	0.545856	0.500445	CD74/CCR7	2
BP	GO:2001259	positive regulation of cation channel activity	2/221	69/17913	0.209292	0.545856	0.500445	CACNG4/ACTN2	2
BP	GO:0007178	transmembrane receptor protein serine/threonine kinase signaling pathway	6/221	323/17913	0.210071	0.545856	0.500445	FGF8/ACVR1B/LRRC32/PRDM16/NODAL/GREM1	6
BP	GO:0007498	mesoderm development	3/221	128/17913	0.210197	0.545856	0.500445	PAX2/FGF8/NODAL	3
BP	GO:0014013	regulation of gliogenesis	3/221	128/17913	0.210197	0.545856	0.500445	ID2/MYB/C5AR1	3
BP	GO:0045995	regulation of embryonic development	3/221	128/17913	0.210197	0.545856	0.500445	TBX2/NODAL/DLL1	3
BP	GO:0051494	negative regulation of cytoskeleton organization	3/221	128/17913	0.210197	0.545856	0.500445	SPTB/TUBB4A/PLEKHH2	3
BP	GO:0002029	desensitization of G protein-coupled receptor signaling pathway	1/221	19/17913	0.21021	0.545856	0.500445	GIPR	1
BP	GO:0006677	glycosylceramide metabolic process	1/221	19/17913	0.21021	0.545856	0.500445	CLN3	1
BP	GO:0006833	water transport	1/221	19/17913	0.21021	0.545856	0.500445	SLC14A1	1
BP	GO:0007350	blastoderm segmentation	1/221	19/17913	0.21021	0.545856	0.500445	FRS2	1
BP	GO:0009713	catechol-containing compound biosynthetic process	1/221	19/17913	0.21021	0.545856	0.500445	DDC	1
BP	GO:0018195	peptidyl-arginine modification	1/221	19/17913	0.21021	0.545856	0.500445	PADI2	1
BP	GO:0019184	nonribosomal peptide biosynthetic process	1/221	19/17913	0.21021	0.545856	0.500445	CHAC1	1
BP	GO:0022401	negative adaptation of signaling pathway	1/221	19/17913	0.21021	0.545856	0.500445	GIPR	1
BP	GO:0023019	signal transduction involved in regulation of gene expression	1/221	19/17913	0.21021	0.545856	0.500445	FGF8	1
BP	GO:0030859	polarized epithelial cell differentiation	1/221	19/17913	0.21021	0.545856	0.500445	SH3BP1	1
BP	GO:0030949	positive regulation of vascular endothelial growth factor receptor signaling pathway	1/221	19/17913	0.21021	0.545856	0.500445	PRKCB	1
BP	GO:0032331	negative regulation of chondrocyte differentiation	1/221	19/17913	0.21021	0.545856	0.500445	GREM1	1
BP	GO:0034104	negative regulation of tissue remodeling	1/221	19/17913	0.21021	0.545856	0.500445	GREM1	1
BP	GO:0034389	lipid droplet organization	1/221	19/17913	0.21021	0.545856	0.500445	BSCL2	1
BP	GO:0035268	protein mannosylation	1/221	19/17913	0.21021	0.545856	0.500445	FKTN	1
BP	GO:0042423	catecholamine biosynthetic process	1/221	19/17913	0.21021	0.545856	0.500445	DDC	1
BP	GO:0042693	muscle cell fate commitment	1/221	19/17913	0.21021	0.545856	0.500445	TBX2	1
BP	GO:0043153	entrainment of circadian clock by photoperiod	1/221	19/17913	0.21021	0.545856	0.500445	ID2	1
BP	GO:0045663	positive regulation of myoblast differentiation	1/221	19/17913	0.21021	0.545856	0.500445	RIPOR2	1
BP	GO:0046653	tetrahydrofolate metabolic process	1/221	19/17913	0.21021	0.545856	0.500445	ALDH1L2	1
BP	GO:0046655	folic acid metabolic process	1/221	19/17913	0.21021	0.545856	0.500445	ALDH1L2	1
BP	GO:0050860	negative regulation of T cell receptor signaling pathway	1/221	19/17913	0.21021	0.545856	0.500445	PVRIG	1
BP	GO:0060252	positive regulation of glial cell proliferation	1/221	19/17913	0.21021	0.545856	0.500445	MYB	1
BP	GO:0061081	positive regulation of myeloid leukocyte cytokine production involved in immune response	1/221	19/17913	0.21021	0.545856	0.500445	CD74	1
BP	GO:0071243	cellular response to arsenic-containing substance	1/221	19/17913	0.21021	0.545856	0.500445	HMOX1	1
BP	GO:0071294	cellular response to zinc ion	1/221	19/17913	0.21021	0.545856	0.500445	MT1F	1
BP	GO:0071731	response to nitric oxide	1/221	19/17913	0.21021	0.545856	0.500445	CCR7	1
BP	GO:0072074	kidney mesenchyme development	1/221	19/17913	0.21021	0.545856	0.500445	PAX2	1
BP	GO:0089718	amino acid import across plasma membrane	1/221	19/17913	0.21021	0.545856	0.500445	SLC1A3	1
BP	GO:1901881	positive regulation of protein depolymerization	1/221	19/17913	0.21021	0.545856	0.500445	ACTN2	1
BP	GO:1905939	regulation of gonad development	1/221	19/17913	0.21021	0.545856	0.500445	NUPR1	1
BP	GO:2000696	regulation of epithelial cell differentiation involved in kidney development	1/221	19/17913	0.21021	0.545856	0.500445	PAX2	1
BP	GO:0002440	production of molecular mediator of immune response	4/221	191/17913	0.21066	0.546082	0.500652	CD74/HMOX1/KLK7/C17orf99	4
BP	GO:1901654	response to ketone	4/221	191/17913	0.21066	0.546082	0.500652	CCR7/HOXD13/FBXO32/PTAFR	4
BP	GO:0030518	intracellular steroid hormone receptor signaling pathway	3/221	129/17913	0.213398	0.552353	0.506401	RHOXF1/PADI2/NODAL	3
BP	GO:0034381	plasma lipoprotein particle clearance	2/221	70/17913	0.213814	0.552353	0.506401	APOB/HMOX1	2
BP	GO:0090502	RNA phosphodiester bond hydrolysis, endonucleolytic	2/221	70/17913	0.213814	0.552353	0.506401	AGO1/RPPH1	2
BP	GO:1902476	chloride transmembrane transport	2/221	70/17913	0.213814	0.552353	0.506401	SLC1A3/SLC26A9	2
BP	GO:0007565	female pregnancy	4/221	193/17913	0.215818	0.553964	0.507878	TLE6/ACVR1B/NODAL/PSG1	4
BP	GO:0001889	liver development	3/221	130/17913	0.21661	0.553964	0.507878	HMOX1/HNF1A/NODAL	3
BP	GO:0001707	mesoderm formation	2/221	71/17913	0.218345	0.553964	0.507878	PAX2/NODAL	2
BP	GO:0019674	NAD metabolic process	2/221	71/17913	0.218345	0.553964	0.507878	KMO/PGAM2	2
BP	GO:0030500	regulation of bone mineralization	2/221	71/17913	0.218345	0.553964	0.507878	GREM1/ISG15	2
BP	GO:0042310	vasoconstriction	2/221	71/17913	0.218345	0.553964	0.507878	PTAFR/KEL	2
BP	GO:0070664	negative regulation of leukocyte proliferation	2/221	71/17913	0.218345	0.553964	0.507878	LRRC32/GREM1	2
BP	GO:0002438	acute inflammatory response to antigenic stimulus	1/221	20/17913	0.219964	0.553964	0.507878	CCR7	1
BP	GO:0003323	type B pancreatic cell development	1/221	20/17913	0.219964	0.553964	0.507878	DLL1	1
BP	GO:0010560	positive regulation of glycoprotein biosynthetic process	1/221	20/17913	0.219964	0.553964	0.507878	CCR7	1
BP	GO:0015012	heparan sulfate proteoglycan biosynthetic process	1/221	20/17913	0.219964	0.553964	0.507878	HS3ST3B1	1
BP	GO:0015874	norepinephrine transport	1/221	20/17913	0.219964	0.553964	0.507878	SLC6A2	1
BP	GO:0030878	thyroid gland development	1/221	20/17913	0.219964	0.553964	0.507878	FGF8	1
BP	GO:0031498	chromatin disassembly	1/221	20/17913	0.219964	0.553964	0.507878	PADI2	1
BP	GO:0032211	negative regulation of telomere maintenance via telomerase	1/221	20/17913	0.219964	0.553964	0.507878	PINX1	1
BP	GO:0042053	regulation of dopamine metabolic process	1/221	20/17913	0.219964	0.553964	0.507878	TACR3	1
BP	GO:0042069	regulation of catecholamine metabolic process	1/221	20/17913	0.219964	0.553964	0.507878	TACR3	1
BP	GO:0043586	tongue development	1/221	20/17913	0.219964	0.553964	0.507878	PRDM16	1
BP	GO:0045655	regulation of monocyte differentiation	1/221	20/17913	0.219964	0.553964	0.507878	CD74	1
BP	GO:0060216	definitive hemopoiesis	1/221	20/17913	0.219964	0.553964	0.507878	HIPK1	1
BP	GO:0060602	branch elongation of an epithelium	1/221	20/17913	0.219964	0.553964	0.507878	HOXD13	1
BP	GO:0060972	left/right pattern formation	1/221	20/17913	0.219964	0.553964	0.507878	DLL1	1
BP	GO:0061003	positive regulation of dendritic spine morphogenesis	1/221	20/17913	0.219964	0.553964	0.507878	PAK3	1
BP	GO:0061162	establishment of monopolar cell polarity	1/221	20/17913	0.219964	0.553964	0.507878	SH3BP1	1
BP	GO:0071636	positive regulation of transforming growth factor beta production	1/221	20/17913	0.219964	0.553964	0.507878	MYB	1
BP	GO:0072234	metanephric nephron tubule development	1/221	20/17913	0.219964	0.553964	0.507878	PAX2	1
BP	GO:0097503	sialylation	1/221	20/17913	0.219964	0.553964	0.507878	ST8SIA3	1
BP	GO:1900424	regulation of defense response to bacterium	1/221	20/17913	0.219964	0.553964	0.507878	KLK7	1
BP	GO:1905523	positive regulation of macrophage migration	1/221	20/17913	0.219964	0.553964	0.507878	C5AR1	1
BP	GO:2000380	regulation of mesoderm development	1/221	20/17913	0.219964	0.553964	0.507878	NODAL	1
BP	GO:0043624	cellular protein complex disassembly	4/221	195/17913	0.22101	0.556131	0.509865	SPTB/ACTN2/SH3BP1/PLEKHH2	4
BP	GO:0006081	cellular aldehyde metabolic process	2/221	72/17913	0.222885	0.558979	0.512476	BCO1/AGXT	2
BP	GO:0032413	negative regulation of ion transmembrane transporter activity	2/221	72/17913	0.222885	0.558979	0.512476	ACTN2/CAB39	2
BP	GO:0035019	somatic stem cell population maintenance	2/221	72/17913	0.222885	0.558979	0.512476	PAX2/PRDM16	2
BP	GO:0072347	response to anesthetic	2/221	72/17913	0.222885	0.558979	0.512476	CACNG4/TACR3	2
BP	GO:0043281	regulation of cysteine-type endopeptidase activity involved in apoptotic process	4/221	196/17913	0.223618	0.56035	0.513734	PAX2/IFI6/EGLN3/NODAL	4
BP	GO:0050880	regulation of blood vessel size	3/221	133/17913	0.226304	0.560392	0.513772	HMOX1/PTAFR/KEL	3
BP	GO:0061008	hepaticobiliary system development	3/221	133/17913	0.226304	0.560392	0.513772	HMOX1/HNF1A/NODAL	3
BP	GO:0007492	endoderm development	2/221	73/17913	0.227432	0.560392	0.513772	FGF8/NODAL	2
BP	GO:0048332	mesoderm morphogenesis	2/221	73/17913	0.227432	0.560392	0.513772	PAX2/NODAL	2
BP	GO:0030336	negative regulation of cell migration	6/221	332/17913	0.227763	0.560392	0.513772	HMOX1/RIPOR2/PADI2/NODAL/GREM1/DACH1	6
BP	GO:0006865	amino acid transport	3/221	134/17913	0.229555	0.560392	0.513772	SLC1A3/KMO/CLN3	3
BP	GO:0030260	entry into host cell	3/221	134/17913	0.229555	0.560392	0.513772	CD74/ITGB7/DPP4	3
BP	GO:0035150	regulation of tube size	3/221	134/17913	0.229555	0.560392	0.513772	HMOX1/PTAFR/KEL	3
BP	GO:0044409	entry into host	3/221	134/17913	0.229555	0.560392	0.513772	CD74/ITGB7/DPP4	3
BP	GO:0051806	entry into cell of other organism involved in symbiotic interaction	3/221	134/17913	0.229555	0.560392	0.513772	CD74/ITGB7/DPP4	3
BP	GO:0051828	entry into other organism involved in symbiotic interaction	3/221	134/17913	0.229555	0.560392	0.513772	CD74/ITGB7/DPP4	3
BP	GO:0001956	positive regulation of neurotransmitter secretion	1/221	21/17913	0.229599	0.560392	0.513772	KMO	1
BP	GO:0003283	atrial septum development	1/221	21/17913	0.229599	0.560392	0.513772	MDM4	1
BP	GO:0008045	motor neuron axon guidance	1/221	21/17913	0.229599	0.560392	0.513772	FGF8	1
BP	GO:0010829	negative regulation of glucose transmembrane transport	1/221	21/17913	0.229599	0.560392	0.513772	PRKCB	1
BP	GO:0010884	positive regulation of lipid storage	1/221	21/17913	0.229599	0.560392	0.513772	APOB	1
BP	GO:0015813	L-glutamate transmembrane transport	1/221	21/17913	0.229599	0.560392	0.513772	SLC1A3	1
BP	GO:0023058	adaptation of signaling pathway	1/221	21/17913	0.229599	0.560392	0.513772	GIPR	1
BP	GO:0031935	regulation of chromatin silencing	1/221	21/17913	0.229599	0.560392	0.513772	TET1	1
BP	GO:0035024	negative regulation of Rho protein signal transduction	1/221	21/17913	0.229599	0.560392	0.513772	RIPOR2	1
BP	GO:0042219	cellular modified amino acid catabolic process	1/221	21/17913	0.229599	0.560392	0.513772	ALDH1L2	1
BP	GO:0043090	amino acid import	1/221	21/17913	0.229599	0.560392	0.513772	SLC1A3	1
BP	GO:0050765	negative regulation of phagocytosis	1/221	21/17913	0.229599	0.560392	0.513772	PRTN3	1
BP	GO:0051900	regulation of mitochondrial depolarization	1/221	21/17913	0.229599	0.560392	0.513772	IFI6	1
BP	GO:0060260	regulation of transcription initiation from RNA polymerase II promoter	1/221	21/17913	0.229599	0.560392	0.513772	HNF1A	1
BP	GO:0060396	growth hormone receptor signaling pathway	1/221	21/17913	0.229599	0.560392	0.513772	LEPROT	1
BP	GO:0061339	establishment or maintenance of monopolar cell polarity	1/221	21/17913	0.229599	0.560392	0.513772	SH3BP1	1
BP	GO:0071379	cellular response to prostaglandin stimulus	1/221	21/17913	0.229599	0.560392	0.513772	APOB	1
BP	GO:1903010	regulation of bone development	1/221	21/17913	0.229599	0.560392	0.513772	GREM1	1
BP	GO:1904886	beta-catenin destruction complex disassembly	1/221	21/17913	0.229599	0.560392	0.513772	WNT8B	1
BP	GO:2000114	regulation of establishment of cell polarity	1/221	21/17913	0.229599	0.560392	0.513772	RIPOR2	1
BP	GO:2000144	positive regulation of DNA-templated transcription, initiation	1/221	21/17913	0.229599	0.560392	0.513772	HNF1A	1
BP	GO:0002064	epithelial cell development	4/221	199/17913	0.231492	0.563475	0.516598	RIPOR2/FRS2/DLL1/CDSN	4
BP	GO:0050679	positive regulation of epithelial cell proliferation	4/221	199/17913	0.231492	0.563475	0.516598	PAX2/HMOX1/NODAL/C5AR1	4
BP	GO:0090276	regulation of peptide hormone secretion	4/221	199/17913	0.231492	0.563475	0.516598	GIPR/ILDR1/EPHA5/DPP4	4
BP	GO:0021675	nerve development	2/221	74/17913	0.231986	0.563475	0.516598	PAX2/SLC1A3	2
BP	GO:0043367	CD4-positive, alpha-beta T cell differentiation	2/221	74/17913	0.231986	0.563475	0.516598	MYB/NKX2-3	2
BP	GO:0055072	iron ion homeostasis	2/221	74/17913	0.231986	0.563475	0.516598	CP/HMOX1	2
BP	GO:0071356	cellular response to tumor necrosis factor	5/221	266/17913	0.232272	0.563715	0.516818	APOB/TRIM32/CD70/HIPK1/SLC2A4	5
BP	GO:0002920	regulation of humoral immune response	3/221	135/17913	0.232814	0.564573	0.517605	CCR7/KLK7/C5AR1	3
BP	GO:0010038	response to metal ion	6/221	335/17913	0.233766	0.566155	0.519056	GIPR/HMOX1/ID2/TNNT2/PGAM2/MT1F	6
BP	GO:0007254	JNK cascade	4/221	200/17913	0.234132	0.566155	0.519056	FKTN/CCR7/FGF19/CDC42EP5	4
BP	GO:0030073	insulin secretion	4/221	200/17913	0.234132	0.566155	0.519056	GIPR/HNF1A/EPHA5/DPP4	4
BP	GO:0060041	retina development in camera-type eye	3/221	136/17913	0.236081	0.566155	0.519056	PAX2/HIPK1/DLL1	3
BP	GO:1903305	regulation of regulated secretory pathway	3/221	136/17913	0.236081	0.566155	0.519056	HMOX1/PRKCB/PTAFR	3
BP	GO:0031100	animal organ regeneration	2/221	75/17913	0.236545	0.566155	0.519056	HMOX1/C5AR1	2
BP	GO:1901224	positive regulation of NIK/NF-kappaB signaling	2/221	75/17913	0.236545	0.566155	0.519056	AGO1/GREM1	2
BP	GO:0043491	protein kinase B signaling	5/221	268/17913	0.236808	0.566155	0.519056	PAX2/FGF8/CCR7/FGF19/FRS2	5
BP	GO:0008299	isoprenoid biosynthetic process	1/221	22/17913	0.239115	0.566155	0.519056	BCO1	1
BP	GO:0009068	aspartate family amino acid catabolic process	1/221	22/17913	0.239115	0.566155	0.519056	SDSL	1
BP	GO:0010226	response to lithium ion	1/221	22/17913	0.239115	0.566155	0.519056	ID2	1
BP	GO:0010842	retina layer formation	1/221	22/17913	0.239115	0.566155	0.519056	HIPK1	1
BP	GO:0015740	C4-dicarboxylate transport	1/221	22/17913	0.239115	0.566155	0.519056	SLC1A3	1
BP	GO:0018126	protein hydroxylation	1/221	22/17913	0.239115	0.566155	0.519056	EGLN3	1
BP	GO:0021516	dorsal spinal cord development	1/221	22/17913	0.239115	0.566155	0.519056	LHX5	1
BP	GO:0034695	response to prostaglandin E	1/221	22/17913	0.239115	0.566155	0.519056	CCR7	1
BP	GO:0035590	purinergic nucleotide receptor signaling pathway	1/221	22/17913	0.239115	0.566155	0.519056	PTAFR	1
BP	GO:0043302	positive regulation of leukocyte degranulation	1/221	22/17913	0.239115	0.566155	0.519056	PTAFR	1
BP	GO:0044342	type B pancreatic cell proliferation	1/221	22/17913	0.239115	0.566155	0.519056	NUPR1	1
BP	GO:0045624	positive regulation of T-helper cell differentiation	1/221	22/17913	0.239115	0.566155	0.519056	MYB	1
BP	GO:0045649	regulation of macrophage differentiation	1/221	22/17913	0.239115	0.566155	0.519056	ID2	1
BP	GO:0046716	muscle cell cellular homeostasis	1/221	22/17913	0.239115	0.566155	0.519056	TRIM32	1
BP	GO:0050995	negative regulation of lipid catabolic process	1/221	22/17913	0.239115	0.566155	0.519056	BSCL2	1
BP	GO:0051195	negative regulation of cofactor metabolic process	1/221	22/17913	0.239115	0.566155	0.519056	NUPR1	1
BP	GO:0051220	cytoplasmic sequestering of protein	1/221	22/17913	0.239115	0.566155	0.519056	MXI1	1
BP	GO:0060390	regulation of SMAD protein signal transduction	1/221	22/17913	0.239115	0.566155	0.519056	NODAL	1
BP	GO:0071378	cellular response to growth hormone stimulus	1/221	22/17913	0.239115	0.566155	0.519056	LEPROT	1
BP	GO:0072643	interferon-gamma secretion	1/221	22/17913	0.239115	0.566155	0.519056	ISG15	1
BP	GO:0080111	DNA demethylation	1/221	22/17913	0.239115	0.566155	0.519056	TET1	1
BP	GO:1903306	negative regulation of regulated secretory pathway	1/221	22/17913	0.239115	0.566155	0.519056	HMOX1	1
BP	GO:0006885	regulation of pH	2/221	76/17913	0.24111	0.568195	0.520926	ATP6V0E2/CLN3	2
BP	GO:0014015	positive regulation of gliogenesis	2/221	76/17913	0.24111	0.568195	0.520926	ID2/MYB	2
BP	GO:0015837	amine transport	2/221	76/17913	0.24111	0.568195	0.520926	KMO/DDC	2
BP	GO:0031397	negative regulation of protein ubiquitination	2/221	76/17913	0.24111	0.568195	0.520926	ISG15/PINX1	2
BP	GO:0150076	neuroinflammatory response	2/221	76/17913	0.24111	0.568195	0.520926	NUPR1/C5AR1	2
BP	GO:1902803	regulation of synaptic vesicle transport	2/221	76/17913	0.24111	0.568195	0.520926	PRKCB/SLC2A4	2
BP	GO:0006066	alcohol metabolic process	6/221	339/17913	0.241847	0.569486	0.522109	ADCYAP1R1/APOB/BCO1/CYP39A1/PLD4/PTAFR	6
BP	GO:0010675	regulation of cellular carbohydrate metabolic process	3/221	138/17913	0.24264	0.570461	0.523003	ADCYAP1R1/PTAFR/NUPR1	3
BP	GO:0031056	regulation of histone modification	3/221	138/17913	0.24264	0.570461	0.523003	MYB/TET1/HIST1H1B	3
BP	GO:0030279	negative regulation of ossification	2/221	77/17913	0.245678	0.570878	0.523386	ID2/GREM1	2
BP	GO:0043044	ATP-dependent chromatin remodeling	2/221	77/17913	0.245678	0.570878	0.523386	HIST1H4A/HIST1H4B	2
BP	GO:0045685	regulation of glial cell differentiation	2/221	77/17913	0.245678	0.570878	0.523386	ID2/C5AR1	2
BP	GO:0090398	cellular senescence	2/221	77/17913	0.245678	0.570878	0.523386	ID2/TBX2	2
BP	GO:0051384	response to glucocorticoid	3/221	139/17913	0.245931	0.570878	0.523386	FBXO32/PTAFR/AGXT	3
BP	GO:0071322	cellular response to carbohydrate stimulus	3/221	139/17913	0.245931	0.570878	0.523386	PAX2/EPHA5/PRKCB	3
BP	GO:0043588	skin development	7/221	412/17913	0.247574	0.570878	0.523386	ACVR1B/KRT13/POU3F1/HRNR/DLL1/CDSN/ASPRV1	7
BP	GO:0001654	eye development	6/221	342/17913	0.247962	0.570878	0.523386	PAX2/TBX2/HIPK1/FRS2/LCTL/DLL1	6
BP	GO:0001783	B cell apoptotic process	1/221	23/17913	0.248513	0.570878	0.523386	CD74	1
BP	GO:0006458	'de novo' protein folding	1/221	23/17913	0.248513	0.570878	0.523386	CD74	1
BP	GO:0009404	toxin metabolic process	1/221	23/17913	0.248513	0.570878	0.523386	DDC	1
BP	GO:0009648	photoperiodism	1/221	23/17913	0.248513	0.570878	0.523386	ID2	1
BP	GO:0010758	regulation of macrophage chemotaxis	1/221	23/17913	0.248513	0.570878	0.523386	C5AR1	1
BP	GO:0032878	regulation of establishment or maintenance of cell polarity	1/221	23/17913	0.248513	0.570878	0.523386	RIPOR2	1
BP	GO:0035588	G protein-coupled purinergic receptor signaling pathway	1/221	23/17913	0.248513	0.570878	0.523386	PTAFR	1
BP	GO:0048240	sperm capacitation	1/221	23/17913	0.248513	0.570878	0.523386	CATSPERZ	1
BP	GO:0051882	mitochondrial depolarization	1/221	23/17913	0.248513	0.570878	0.523386	IFI6	1
BP	GO:0051968	positive regulation of synaptic transmission, glutamatergic	1/221	23/17913	0.248513	0.570878	0.523386	KMO	1
BP	GO:0060143	positive regulation of syncytium formation by plasma membrane fusion	1/221	23/17913	0.248513	0.570878	0.523386	RIPOR2	1
BP	GO:0060445	branching involved in salivary gland morphogenesis	1/221	23/17913	0.248513	0.570878	0.523386	FGF8	1
BP	GO:0061436	establishment of skin barrier	1/221	23/17913	0.248513	0.570878	0.523386	HRNR	1
BP	GO:0071157	negative regulation of cell cycle arrest	1/221	23/17913	0.248513	0.570878	0.523386	MDM4	1
BP	GO:0071526	semaphorin-plexin signaling pathway	1/221	23/17913	0.248513	0.570878	0.523386	SH3BP1	1
BP	GO:0072170	metanephric tubule development	1/221	23/17913	0.248513	0.570878	0.523386	PAX2	1
BP	GO:0072215	regulation of metanephros development	1/221	23/17913	0.248513	0.570878	0.523386	PAX2	1
BP	GO:0072243	metanephric nephron epithelium development	1/221	23/17913	0.248513	0.570878	0.523386	PAX2	1
BP	GO:0097150	neuronal stem cell population maintenance	1/221	23/17913	0.248513	0.570878	0.523386	DLL1	1
BP	GO:1900746	regulation of vascular endothelial growth factor signaling pathway	1/221	23/17913	0.248513	0.570878	0.523386	DLL1	1
BP	GO:1902254	negative regulation of intrinsic apoptotic signaling pathway by p53 class mediator	1/221	23/17913	0.248513	0.570878	0.523386	CD74	1
BP	GO:1903589	positive regulation of blood vessel endothelial cell proliferation involved in sprouting angiogenesis	1/221	23/17913	0.248513	0.570878	0.523386	HMOX1	1
BP	GO:1904064	positive regulation of cation transmembrane transport	3/221	140/17913	0.249229	0.571256	0.523732	CACNG4/ACTN2/CXCL11	3
BP	GO:0010827	regulation of glucose transmembrane transport	2/221	78/17913	0.25025	0.571256	0.523732	FGF19/PRKCB	2
BP	GO:0022617	extracellular matrix disassembly	2/221	78/17913	0.25025	0.571256	0.523732	KLK7/DPP4	2
BP	GO:0045913	positive regulation of carbohydrate metabolic process	2/221	78/17913	0.25025	0.571256	0.523732	ADCYAP1R1/PTAFR	2
BP	GO:1905954	positive regulation of lipid localization	2/221	78/17913	0.25025	0.571256	0.523732	APOB/MYB	2
BP	GO:0043312	neutrophil degranulation	8/221	485/17913	0.250933	0.571256	0.523732	PADI2/TCN1/CAB39/PTAFR/METTL7A/PRTN3/C5AR1/HRNR	8
BP	GO:1901215	negative regulation of neuron death	4/221	207/17913	0.252808	0.571256	0.523732	HMOX1/FGF8/C5AR1/CLN3	4
BP	GO:0060047	heart contraction	5/221	275/17913	0.252874	0.571256	0.523732	CACNG4/SLC8A2/TNNT2/TBX2/TACR3	5
BP	GO:0006029	proteoglycan metabolic process	2/221	79/17913	0.254824	0.571256	0.523732	HS3ST3B1/BGN	2
BP	GO:0021766	hippocampus development	2/221	79/17913	0.254824	0.571256	0.523732	LHX5/EPHA5	2
BP	GO:0043154	negative regulation of cysteine-type endopeptidase activity involved in apoptotic process	2/221	79/17913	0.254824	0.571256	0.523732	PAX2/IFI6	2
BP	GO:0097756	negative regulation of blood vessel diameter	2/221	79/17913	0.254824	0.571256	0.523732	PTAFR/KEL	2
BP	GO:2001021	negative regulation of response to DNA damage stimulus	2/221	79/17913	0.254824	0.571256	0.523732	CD74/TRIM32	2
BP	GO:0001822	kidney development	5/221	276/17913	0.255191	0.571256	0.523732	PAX2/FGF8/ID2/GREM1/DLL1	5
BP	GO:0007612	learning	3/221	142/17913	0.255845	0.571256	0.523732	SLC8A2/SLC24A2/CLN3	3
BP	GO:0019359	nicotinamide nucleotide biosynthetic process	3/221	142/17913	0.255845	0.571256	0.523732	KMO/PGAM2/NUPR1	3
BP	GO:0019363	pyridine nucleotide biosynthetic process	3/221	142/17913	0.255845	0.571256	0.523732	KMO/PGAM2/NUPR1	3
BP	GO:0002283	neutrophil activation involved in immune response	8/221	488/17913	0.256103	0.571256	0.523732	PADI2/TCN1/CAB39/PTAFR/METTL7A/PRTN3/C5AR1/HRNR	8
BP	GO:0009913	epidermal cell differentiation	6/221	346/17913	0.256184	0.571256	0.523732	RIPOR2/KRT13/POU3F1/HRNR/DLL1/CDSN	6
BP	GO:0150063	visual system development	6/221	346/17913	0.256184	0.571256	0.523732	PAX2/TBX2/HIPK1/FRS2/LCTL/DLL1	6
BP	GO:0002082	regulation of oxidative phosphorylation	1/221	24/17913	0.257797	0.571256	0.523732	NUPR1	1
BP	GO:0002092	positive regulation of receptor internalization	1/221	24/17913	0.257797	0.571256	0.523732	GREM1	1
BP	GO:0002407	dendritic cell chemotaxis	1/221	24/17913	0.257797	0.571256	0.523732	CCR7	1
BP	GO:0002861	regulation of inflammatory response to antigenic stimulus	1/221	24/17913	0.257797	0.571256	0.523732	CCR7	1
BP	GO:0003181	atrioventricular valve morphogenesis	1/221	24/17913	0.257797	0.571256	0.523732	MDM4	1
BP	GO:0003272	endocardial cushion formation	1/221	24/17913	0.257797	0.571256	0.523732	FGF8	1
BP	GO:0006688	glycosphingolipid biosynthetic process	1/221	24/17913	0.257797	0.571256	0.523732	ST8SIA3	1
BP	GO:0009299	mRNA transcription	1/221	24/17913	0.257797	0.571256	0.523732	C5AR1	1
BP	GO:0021871	forebrain regionalization	1/221	24/17913	0.257797	0.571256	0.523732	FGF8	1
BP	GO:0031954	positive regulation of protein autophosphorylation	1/221	24/17913	0.257797	0.571256	0.523732	GREM1	1
BP	GO:0032897	negative regulation of viral transcription	1/221	24/17913	0.257797	0.571256	0.523732	TRIM32	1
BP	GO:0034035	purine ribonucleoside bisphosphate metabolic process	1/221	24/17913	0.257797	0.571256	0.523732	ABHD14B	1
BP	GO:0042481	regulation of odontogenesis	1/221	24/17913	0.257797	0.571256	0.523732	FGF8	1
BP	GO:0045954	positive regulation of natural killer cell mediated cytotoxicity	1/221	24/17913	0.257797	0.571256	0.523732	NCR3	1
BP	GO:0048143	astrocyte activation	1/221	24/17913	0.257797	0.571256	0.523732	C5AR1	1
BP	GO:0048643	positive regulation of skeletal muscle tissue development	1/221	24/17913	0.257797	0.571256	0.523732	DLL1	1
BP	GO:0050427	3'-phosphoadenosine 5'-phosphosulfate metabolic process	1/221	24/17913	0.257797	0.571256	0.523732	ABHD14B	1
BP	GO:0060259	regulation of feeding behavior	1/221	24/17913	0.257797	0.571256	0.523732	TACR3	1
BP	GO:0060343	trabecula formation	1/221	24/17913	0.257797	0.571256	0.523732	GREM1	1
BP	GO:0062009	secondary palate development	1/221	24/17913	0.257797	0.571256	0.523732	LRRC32	1
BP	GO:0070199	establishment of protein localization to chromosome	1/221	24/17913	0.257797	0.571256	0.523732	HIST1H1B	1
BP	GO:0090103	cochlea morphogenesis	1/221	24/17913	0.257797	0.571256	0.523732	PAX2	1
BP	GO:0150078	positive regulation of neuroinflammatory response	1/221	24/17913	0.257797	0.571256	0.523732	NUPR1	1
BP	GO:1902547	regulation of cellular response to vascular endothelial growth factor stimulus	1/221	24/17913	0.257797	0.571256	0.523732	DLL1	1
BP	GO:1903020	positive regulation of glycoprotein metabolic process	1/221	24/17913	0.257797	0.571256	0.523732	CCR7	1
BP	GO:1903421	regulation of synaptic vesicle recycling	1/221	24/17913	0.257797	0.571256	0.523732	SLC2A4	1
BP	GO:2000178	negative regulation of neural precursor cell proliferation	1/221	24/17913	0.257797	0.571256	0.523732	ID2	1
BP	GO:2000209	regulation of anoikis	1/221	24/17913	0.257797	0.571256	0.523732	CEACAM5	1
BP	GO:2000146	negative regulation of cell motility	6/221	347/17913	0.258252	0.571843	0.52427	HMOX1/RIPOR2/PADI2/NODAL/GREM1/DACH1	6
BP	GO:0062013	positive regulation of small molecule metabolic process	3/221	143/17913	0.259162	0.572699	0.525055	ADCYAP1R1/PTAFR/NUPR1	3
BP	GO:1902107	positive regulation of leukocyte differentiation	3/221	143/17913	0.259162	0.572699	0.525055	CD74/ID2/MYB	3
BP	GO:0003151	outflow tract morphogenesis	2/221	80/17913	0.2594	0.572699	0.525055	FGF8/TBX2	2
BP	GO:0030004	cellular monovalent inorganic cation homeostasis	2/221	80/17913	0.2594	0.572699	0.525055	ATP6V0E2/CLN3	2
BP	GO:0071456	cellular response to hypoxia	4/221	210/17913	0.260907	0.574636	0.526831	HMOX1/EGLN3/SLC2A4/MDM4	4
BP	GO:0006665	sphingolipid metabolic process	3/221	144/17913	0.262485	0.574636	0.526831	ST8SIA3/ENPP7/CLN3	3
BP	GO:0043271	negative regulation of ion transport	3/221	144/17913	0.262485	0.574636	0.526831	ACTN2/CAB39/KEL	3
BP	GO:0051701	interaction with host	4/221	211/17913	0.263618	0.574636	0.526831	CD74/TRIM32/ITGB7/DPP4	4
BP	GO:0006303	double-strand break repair via nonhomologous end joining	2/221	81/17913	0.263977	0.574636	0.526831	HIST1H4A/HIST1H4B	2
BP	GO:0007045	cell-substrate adherens junction assembly	2/221	81/17913	0.263977	0.574636	0.526831	ACTN2/GREM1	2
BP	GO:0045682	regulation of epidermis development	2/221	81/17913	0.263977	0.574636	0.526831	DLL1/CDSN	2
BP	GO:0048041	focal adhesion assembly	2/221	81/17913	0.263977	0.574636	0.526831	ACTN2/GREM1	2
BP	GO:0051899	membrane depolarization	2/221	81/17913	0.263977	0.574636	0.526831	CACNG4/IFI6	2
BP	GO:0046165	alcohol biosynthetic process	3/221	145/17913	0.265813	0.574636	0.526831	ADCYAP1R1/APOB/PTAFR	3
BP	GO:0055002	striated muscle cell development	3/221	145/17913	0.265813	0.574636	0.526831	ACTN2/RIPOR2/KEL	3
BP	GO:0060402	calcium ion transport into cytosol	3/221	145/17913	0.265813	0.574636	0.526831	ADCYAP1R1/CCR7/CXCL11	3
BP	GO:0072525	pyridine-containing compound biosynthetic process	3/221	145/17913	0.265813	0.574636	0.526831	KMO/PGAM2/NUPR1	3
BP	GO:0043583	ear development	4/221	212/17913	0.266334	0.574636	0.526831	PAX2/FGF8/RIPOR2/DLL1	4
BP	GO:0048880	sensory system development	6/221	351/17913	0.266566	0.574636	0.526831	PAX2/TBX2/HIPK1/FRS2/LCTL/DLL1	6
BP	GO:0002068	glandular epithelial cell development	1/221	25/17913	0.266966	0.574636	0.526831	DLL1	1
BP	GO:0002719	negative regulation of cytokine production involved in immune response	1/221	25/17913	0.266966	0.574636	0.526831	HMOX1	1
BP	GO:0003309	type B pancreatic cell differentiation	1/221	25/17913	0.266966	0.574636	0.526831	DLL1	1
BP	GO:0006706	steroid catabolic process	1/221	25/17913	0.266966	0.574636	0.526831	CYP39A1	1
BP	GO:0006730	one-carbon metabolic process	1/221	25/17913	0.266966	0.574636	0.526831	ALDH1L2	1
BP	GO:0009649	entrainment of circadian clock	1/221	25/17913	0.266966	0.574636	0.526831	ID2	1
BP	GO:0010460	positive regulation of heart rate	1/221	25/17913	0.266966	0.574636	0.526831	TACR3	1
BP	GO:0010818	T cell chemotaxis	1/221	25/17913	0.266966	0.574636	0.526831	CXCL11	1
BP	GO:0021544	subpallium development	1/221	25/17913	0.266966	0.574636	0.526831	FGF8	1
BP	GO:0035235	ionotropic glutamate receptor signaling pathway	1/221	25/17913	0.266966	0.574636	0.526831	CLN3	1
BP	GO:0035640	exploration behavior	1/221	25/17913	0.266966	0.574636	0.526831	DPP4	1
BP	GO:0045408	regulation of interleukin-6 biosynthetic process	1/221	25/17913	0.266966	0.574636	0.526831	PTAFR	1
BP	GO:0045662	negative regulation of myoblast differentiation	1/221	25/17913	0.266966	0.574636	0.526831	DLL1	1
BP	GO:0045948	positive regulation of translational initiation	1/221	25/17913	0.266966	0.574636	0.526831	YTHDF3	1
BP	GO:0046426	negative regulation of JAK-STAT cascade	1/221	25/17913	0.266966	0.574636	0.526831	LEPROT	1
BP	GO:0060561	apoptotic process involved in morphogenesis	1/221	25/17913	0.266966	0.574636	0.526831	PAX2	1
BP	GO:0070861	regulation of protein exit from endoplasmic reticulum	1/221	25/17913	0.266966	0.574636	0.526831	SLC35D3	1
BP	GO:0090025	regulation of monocyte chemotaxis	1/221	25/17913	0.266966	0.574636	0.526831	GREM1	1
BP	GO:1901623	regulation of lymphocyte chemotaxis	1/221	25/17913	0.266966	0.574636	0.526831	PADI2	1
BP	GO:1904385	cellular response to angiotensin	1/221	25/17913	0.266966	0.574636	0.526831	ACTN2	1
BP	GO:0034502	protein localization to chromosome	2/221	82/17913	0.268554	0.57519	0.527339	HIST1H1B/PINX1	2
BP	GO:0071158	positive regulation of cell cycle arrest	2/221	82/17913	0.268554	0.57519	0.527339	ID2/MDM4	2
BP	GO:2000106	regulation of leukocyte apoptotic process	2/221	82/17913	0.268554	0.57519	0.527339	CD74/CCR7	2
BP	GO:0010639	negative regulation of organelle organization	6/221	352/17913	0.268655	0.57519	0.527339	SPTB/TUBB4A/TET1/PLEKHH2/NUPR1/PINX1	6
BP	GO:0048754	branching morphogenesis of an epithelial tube	3/221	146/17913	0.269147	0.57519	0.527339	PAX2/FGF8/GREM1	3
BP	GO:0007160	cell-matrix adhesion	4/221	214/17913	0.271782	0.57519	0.527339	ACTN2/CCR7/ITGB7/GREM1	4
BP	GO:0034329	cell junction assembly	4/221	214/17913	0.271782	0.57519	0.527339	ACTN2/SH3BP1/HIPK1/GREM1	4
BP	GO:0070663	regulation of leukocyte proliferation	4/221	214/17913	0.271782	0.57519	0.527339	CD74/CD70/LRRC32/GREM1	4
BP	GO:0050673	epithelial cell proliferation	7/221	425/17913	0.272052	0.57519	0.527339	PAX2/HMOX1/ID2/NODAL/FRS2/NUPR1/C5AR1	7
BP	GO:0006090	pyruvate metabolic process	3/221	147/17913	0.272485	0.57519	0.527339	PGAM2/AGXT/NUPR1	3
BP	GO:0001666	response to hypoxia	6/221	354/17913	0.272846	0.57519	0.527339	HMOX1/MYB/EGLN3/SLC2A4/DPP4/MDM4	6
BP	GO:0002718	regulation of cytokine production involved in immune response	2/221	83/17913	0.273131	0.57519	0.527339	CD74/HMOX1	2
BP	GO:0006672	ceramide metabolic process	2/221	83/17913	0.273131	0.57519	0.527339	ST8SIA3/CLN3	2
BP	GO:0010507	negative regulation of autophagy	2/221	83/17913	0.273131	0.57519	0.527339	HMOX1/NUPR1	2
BP	GO:0032410	negative regulation of transporter activity	2/221	83/17913	0.273131	0.57519	0.527339	ACTN2/CAB39	2
BP	GO:0045582	positive regulation of T cell differentiation	2/221	83/17913	0.273131	0.57519	0.527339	CD74/MYB	2
BP	GO:0046916	cellular transition metal ion homeostasis	2/221	83/17913	0.273131	0.57519	0.527339	CP/HMOX1	2
BP	GO:0003015	heart process	5/221	284/17913	0.273912	0.57519	0.527339	CACNG4/SLC8A2/TNNT2/TBX2/TACR3	5
BP	GO:0034612	response to tumor necrosis factor	5/221	284/17913	0.273912	0.57519	0.527339	APOB/TRIM32/CD70/HIPK1/SLC2A4	5
BP	GO:0048608	reproductive structure development	7/221	426/17913	0.273962	0.57519	0.527339	PCYT1B/FGF8/HOXD13/HSD17B3/NODAL/FRS2/NUPR1	7
BP	GO:0090092	regulation of transmembrane receptor protein serine/threonine kinase signaling pathway	4/221	215/17913	0.274514	0.57519	0.527339	ACVR1B/PRDM16/NODAL/GREM1	4
BP	GO:0002446	neutrophil mediated immunity	8/221	499/17913	0.275337	0.57519	0.527339	PADI2/TCN1/CAB39/PTAFR/METTL7A/PRTN3/C5AR1/HRNR	8
BP	GO:0042119	neutrophil activation	8/221	499/17913	0.275337	0.57519	0.527339	PADI2/TCN1/CAB39/PTAFR/METTL7A/PRTN3/C5AR1/HRNR	8
BP	GO:1902600	proton transmembrane transport	3/221	148/17913	0.275828	0.57519	0.527339	C15orf48/ATP6V0E2/ATP6AP1L	3
BP	GO:0003171	atrioventricular valve development	1/221	26/17913	0.276022	0.57519	0.527339	MDM4	1
BP	GO:0010996	response to auditory stimulus	1/221	26/17913	0.276022	0.57519	0.527339	SLC1A3	1
BP	GO:0022011	myelination in peripheral nervous system	1/221	26/17913	0.276022	0.57519	0.527339	POU3F1	1
BP	GO:0030149	sphingolipid catabolic process	1/221	26/17913	0.276022	0.57519	0.527339	ENPP7	1
BP	GO:0030201	heparan sulfate proteoglycan metabolic process	1/221	26/17913	0.276022	0.57519	0.527339	HS3ST3B1	1
BP	GO:0030206	chondroitin sulfate biosynthetic process	1/221	26/17913	0.276022	0.57519	0.527339	BGN	1
BP	GO:0032292	peripheral nervous system axon ensheathment	1/221	26/17913	0.276022	0.57519	0.527339	POU3F1	1
BP	GO:0032967	positive regulation of collagen biosynthetic process	1/221	26/17913	0.276022	0.57519	0.527339	MYB	1
BP	GO:0033561	regulation of water loss via skin	1/221	26/17913	0.276022	0.57519	0.527339	HRNR	1
BP	GO:0033598	mammary gland epithelial cell proliferation	1/221	26/17913	0.276022	0.57519	0.527339	ID2	1
BP	GO:0034377	plasma lipoprotein particle assembly	1/221	26/17913	0.276022	0.57519	0.527339	APOB	1
BP	GO:0042044	fluid transport	1/221	26/17913	0.276022	0.57519	0.527339	SLC14A1	1
BP	GO:0045992	negative regulation of embryonic development	1/221	26/17913	0.276022	0.57519	0.527339	TBX2	1
BP	GO:0060037	pharyngeal system development	1/221	26/17913	0.276022	0.57519	0.527339	FGF8	1
BP	GO:0060142	regulation of syncytium formation by plasma membrane fusion	1/221	26/17913	0.276022	0.57519	0.527339	RIPOR2	1
BP	GO:0060632	regulation of microtubule-based movement	1/221	26/17913	0.276022	0.57519	0.527339	TTLL6	1
BP	GO:0060969	negative regulation of gene silencing	1/221	26/17913	0.276022	0.57519	0.527339	TET1	1
BP	GO:0061037	negative regulation of cartilage development	1/221	26/17913	0.276022	0.57519	0.527339	GREM1	1
BP	GO:0070168	negative regulation of biomineral tissue development	1/221	26/17913	0.276022	0.57519	0.527339	GREM1	1
BP	GO:1901018	positive regulation of potassium ion transmembrane transporter activity	1/221	26/17913	0.276022	0.57519	0.527339	ACTN2	1
BP	GO:1903579	negative regulation of ATP metabolic process	1/221	26/17913	0.276022	0.57519	0.527339	NUPR1	1
BP	GO:1903959	regulation of anion transmembrane transport	1/221	26/17913	0.276022	0.57519	0.527339	PTAFR	1
BP	GO:0009755	hormone-mediated signaling pathway	4/221	216/17913	0.27725	0.576702	0.528725	RHOXF1/PADI2/NODAL/PAQR8	4
BP	GO:0001776	leukocyte homeostasis	2/221	84/17913	0.277707	0.576702	0.528725	CD74/NKX2-3	2
BP	GO:0030838	positive regulation of actin filament polymerization	2/221	84/17913	0.277707	0.576702	0.528725	CCR7/CDC42EP5	2
BP	GO:0051781	positive regulation of cell division	2/221	84/17913	0.277707	0.576702	0.528725	FGF8/PDGFC	2
BP	GO:0090100	positive regulation of transmembrane receptor protein serine/threonine kinase signaling pathway	2/221	84/17913	0.277707	0.576702	0.528725	ACVR1B/NODAL	2
BP	GO:0050890	cognition	5/221	286/17913	0.278638	0.577838	0.529767	SLC8A2/SLC24A2/GATM/C5AR1/CLN3	5
BP	GO:0051235	maintenance of location	5/221	286/17913	0.278638	0.577838	0.529767	APOB/MXI1/CCR7/BSCL2/CXCL11	5
BP	GO:0061458	reproductive system development	7/221	429/17913	0.279713	0.579667	0.531443	PCYT1B/FGF8/HOXD13/HSD17B3/NODAL/FRS2/NUPR1	7
BP	GO:0042475	odontogenesis of dentin-containing tooth	2/221	85/17913	0.282281	0.580553	0.532256	FGF8/NKX2-3	2
BP	GO:0015698	inorganic anion transport	3/221	150/17913	0.282526	0.580553	0.532256	SLC1A3/PTAFR/SLC26A9	3
BP	GO:0030902	hindbrain development	3/221	150/17913	0.282526	0.580553	0.532256	LHX5/C5AR1/DLL1	3
BP	GO:0009895	negative regulation of catabolic process	5/221	288/17913	0.283381	0.580553	0.532256	HMOX1/AZIN2/BSCL2/NUPR1/MDM4	5
BP	GO:0001782	B cell homeostasis	1/221	27/17913	0.284967	0.580553	0.532256	CD74	1
BP	GO:0006735	NADH regeneration	1/221	27/17913	0.284967	0.580553	0.532256	PGAM2	1
BP	GO:0006760	folic acid-containing compound metabolic process	1/221	27/17913	0.284967	0.580553	0.532256	ALDH1L2	1
BP	GO:0010714	positive regulation of collagen metabolic process	1/221	27/17913	0.284967	0.580553	0.532256	MYB	1
BP	GO:0018200	peptidyl-glutamic acid modification	1/221	27/17913	0.284967	0.580553	0.532256	TTLL6	1
BP	GO:0035116	embryonic hindlimb morphogenesis	1/221	27/17913	0.284967	0.580553	0.532256	FGF8	1
BP	GO:0035883	enteroendocrine cell differentiation	1/221	27/17913	0.284967	0.580553	0.532256	DLL1	1
BP	GO:0036336	dendritic cell migration	1/221	27/17913	0.284967	0.580553	0.532256	CCR7	1
BP	GO:0042226	interleukin-6 biosynthetic process	1/221	27/17913	0.284967	0.580553	0.532256	PTAFR	1
BP	GO:0043304	regulation of mast cell degranulation	1/221	27/17913	0.284967	0.580553	0.532256	HMOX1	1
BP	GO:0044788	modulation by host of viral process	1/221	27/17913	0.284967	0.580553	0.532256	IFI27	1
BP	GO:0045686	negative regulation of glial cell differentiation	1/221	27/17913	0.284967	0.580553	0.532256	ID2	1
BP	GO:0045907	positive regulation of vasoconstriction	1/221	27/17913	0.284967	0.580553	0.532256	PTAFR	1
BP	GO:0050858	negative regulation of antigen receptor-mediated signaling pathway	1/221	27/17913	0.284967	0.580553	0.532256	PVRIG	1
BP	GO:0051569	regulation of histone H3-K4 methylation	1/221	27/17913	0.284967	0.580553	0.532256	MYB	1
BP	GO:0060122	inner ear receptor cell stereocilium organization	1/221	27/17913	0.284967	0.580553	0.532256	RIPOR2	1
BP	GO:0061621	canonical glycolysis	1/221	27/17913	0.284967	0.580553	0.532256	PGAM2	1
BP	GO:0061718	glucose catabolic process to pyruvate	1/221	27/17913	0.284967	0.580553	0.532256	PGAM2	1
BP	GO:0072207	metanephric epithelium development	1/221	27/17913	0.284967	0.580553	0.532256	PAX2	1
BP	GO:1901661	quinone metabolic process	1/221	27/17913	0.284967	0.580553	0.532256	CYP4F11	1
BP	GO:1904357	negative regulation of telomere maintenance via telomere lengthening	1/221	27/17913	0.284967	0.580553	0.532256	PINX1	1
BP	GO:0019932	second-messenger-mediated signaling	6/221	360/17913	0.285513	0.581226	0.532873	GIPR/ADCYAP1R1/SLA2/EPHA5/TSHR/CXCL11	6
BP	GO:0051480	regulation of cytosolic calcium ion concentration	5/221	289/17913	0.285759	0.581226	0.532873	GIPR/ADCYAP1R1/CCR7/CXCL11/CLN3	5
BP	GO:2001236	regulation of extrinsic apoptotic signaling pathway	3/221	151/17913	0.285881	0.581226	0.532873	HMOX1/IFI6/DEPTOR	3
BP	GO:0034446	substrate adhesion-dependent cell spreading	2/221	86/17913	0.286852	0.581226	0.532873	ITGB7/RADIL	2
BP	GO:0048013	ephrin receptor signaling pathway	2/221	86/17913	0.286852	0.581226	0.532873	PAK3/EPHA5	2
BP	GO:1903321	negative regulation of protein modification by small protein conjugation or removal	2/221	86/17913	0.286852	0.581226	0.532873	ISG15/PINX1	2
BP	GO:1903725	regulation of phospholipid metabolic process	2/221	86/17913	0.286852	0.581226	0.532873	SLA2/CCR7	2
BP	GO:2000177	regulation of neural precursor cell proliferation	2/221	86/17913	0.286852	0.581226	0.532873	LHX5/ID2	2
BP	GO:0002526	acute inflammatory response	4/221	220/17913	0.288238	0.581226	0.532873	CCR7/NUPR1/C5AR1/C2CD4A	4
BP	GO:0036294	cellular response to decreased oxygen levels	4/221	220/17913	0.288238	0.581226	0.532873	HMOX1/EGLN3/SLC2A4/MDM4	4
BP	GO:0035690	cellular response to drug	6/221	362/17913	0.289764	0.581226	0.532873	PAX2/HMOX1/MYB/DDC/FBXO32/PTAFR	6
BP	GO:0072001	renal system development	5/221	291/17913	0.290525	0.581226	0.532873	PAX2/FGF8/ID2/GREM1/DLL1	5
BP	GO:0098773	skin epidermis development	2/221	87/17913	0.291421	0.581226	0.532873	ACVR1B/DLL1	2
BP	GO:2000117	negative regulation of cysteine-type endopeptidase activity	2/221	87/17913	0.291421	0.581226	0.532873	PAX2/IFI6	2
BP	GO:0050729	positive regulation of inflammatory response	3/221	153/17913	0.2926	0.581226	0.532873	CCR7/NUPR1/C2CD4A	3
BP	GO:2000116	regulation of cysteine-type endopeptidase activity	4/221	222/17913	0.293756	0.581226	0.532873	PAX2/IFI6/EGLN3/NODAL	4
BP	GO:0001516	prostaglandin biosynthetic process	1/221	28/17913	0.293802	0.581226	0.532873	CD74	1
BP	GO:0002717	positive regulation of natural killer cell mediated immunity	1/221	28/17913	0.293802	0.581226	0.532873	NCR3	1
BP	GO:0006972	hyperosmotic response	1/221	28/17913	0.293802	0.581226	0.532873	TACR3	1
BP	GO:0008209	androgen metabolic process	1/221	28/17913	0.293802	0.581226	0.532873	HSD17B3	1
BP	GO:0010894	negative regulation of steroid biosynthetic process	1/221	28/17913	0.293802	0.581226	0.532873	FGF19	1
BP	GO:0016339	calcium-dependent cell-cell adhesion via plasma membrane cell adhesion molecules	1/221	28/17913	0.293802	0.581226	0.532873	CDH16	1
BP	GO:0018146	keratan sulfate biosynthetic process	1/221	28/17913	0.293802	0.581226	0.532873	CHST5	1
BP	GO:0021884	forebrain neuron development	1/221	28/17913	0.293802	0.581226	0.532873	FGF8	1
BP	GO:0033688	regulation of osteoblast proliferation	1/221	28/17913	0.293802	0.581226	0.532873	GREM1	1
BP	GO:0034367	protein-containing complex remodeling	1/221	28/17913	0.293802	0.581226	0.532873	APOB	1
BP	GO:0034368	protein-lipid complex remodeling	1/221	28/17913	0.293802	0.581226	0.532873	APOB	1
BP	GO:0034369	plasma lipoprotein particle remodeling	1/221	28/17913	0.293802	0.581226	0.532873	APOB	1
BP	GO:0035510	DNA dealkylation	1/221	28/17913	0.293802	0.581226	0.532873	TET1	1
BP	GO:0045577	regulation of B cell differentiation	1/221	28/17913	0.293802	0.581226	0.532873	ID2	1
BP	GO:0046457	prostanoid biosynthetic process	1/221	28/17913	0.293802	0.581226	0.532873	CD74	1
BP	GO:0048265	response to pain	1/221	28/17913	0.293802	0.581226	0.532873	SLC6A2	1
BP	GO:0050855	regulation of B cell receptor signaling pathway	1/221	28/17913	0.293802	0.581226	0.532873	PRKCB	1
BP	GO:0060765	regulation of androgen receptor signaling pathway	1/221	28/17913	0.293802	0.581226	0.532873	NODAL	1
BP	GO:0061157	mRNA destabilization	1/221	28/17913	0.293802	0.581226	0.532873	YTHDF3	1
BP	GO:0061615	glycolytic process through fructose-6-phosphate	1/221	28/17913	0.293802	0.581226	0.532873	PGAM2	1
BP	GO:0061620	glycolytic process through glucose-6-phosphate	1/221	28/17913	0.293802	0.581226	0.532873	PGAM2	1
BP	GO:0070198	protein localization to chromosome, telomeric region	1/221	28/17913	0.293802	0.581226	0.532873	PINX1	1
BP	GO:0070229	negative regulation of lymphocyte apoptotic process	1/221	28/17913	0.293802	0.581226	0.532873	CD74	1
BP	GO:0070306	lens fiber cell differentiation	1/221	28/17913	0.293802	0.581226	0.532873	FRS2	1
BP	GO:0071168	protein localization to chromatin	1/221	28/17913	0.293802	0.581226	0.532873	HIST1H1B	1
BP	GO:0090383	phagosome acidification	1/221	28/17913	0.293802	0.581226	0.532873	ATP6V0E2	1
BP	GO:1900543	negative regulation of purine nucleotide metabolic process	1/221	28/17913	0.293802	0.581226	0.532873	NUPR1	1
BP	GO:1990776	response to angiotensin	1/221	28/17913	0.293802	0.581226	0.532873	ACTN2	1
BP	GO:1901653	cellular response to peptide	6/221	364/17913	0.294029	0.581292	0.532933	ACTN2/TSHR/PRKCB/ATP6V0E2/SLC2A4/LEPROT	6
BP	GO:0000723	telomere maintenance	3/221	154/17913	0.295964	0.583216	0.534697	PINX1/HIST1H4A/HIST1H4B	3
BP	GO:0009791	post-embryonic development	2/221	88/17913	0.295986	0.583216	0.534697	APOB/NKX2-3	2
BP	GO:0070167	regulation of biomineral tissue development	2/221	88/17913	0.295986	0.583216	0.534697	GREM1/ISG15	2
BP	GO:1904035	regulation of epithelial cell apoptotic process	2/221	88/17913	0.295986	0.583216	0.534697	HMOX1/NUPR1	2
BP	GO:0036293	response to decreased oxygen levels	6/221	365/17913	0.296166	0.583216	0.534697	HMOX1/MYB/EGLN3/SLC2A4/DPP4/MDM4	6
BP	GO:0051271	negative regulation of cellular component movement	6/221	365/17913	0.296166	0.583216	0.534697	HMOX1/RIPOR2/PADI2/NODAL/GREM1/DACH1	6
BP	GO:2001234	negative regulation of apoptotic signaling pathway	4/221	223/17913	0.29652	0.583532	0.534987	CD74/HMOX1/TRIM32/IFI6	4
BP	GO:0098656	anion transmembrane transport	4/221	224/17913	0.299288	0.586527	0.537733	SLC1A3/SLC16A7/PTAFR/SLC26A9	4
BP	GO:0021915	neural tube development	3/221	155/17913	0.29933	0.586527	0.537733	PAX2/FGF8/NODAL	3
BP	GO:0031960	response to corticosteroid	3/221	155/17913	0.29933	0.586527	0.537733	FBXO32/PTAFR/AGXT	3
BP	GO:0032496	response to lipopolysaccharide	5/221	295/17913	0.300099	0.586527	0.537733	APOB/KMO/CCR7/PTAFR/C5AR1	5
BP	GO:0000726	non-recombinational repair	2/221	89/17913	0.300546	0.586527	0.537733	HIST1H4A/HIST1H4B	2
BP	GO:0000083	regulation of transcription involved in G1/S transition of mitotic cell cycle	1/221	29/17913	0.302529	0.586527	0.537733	ID2	1
BP	GO:0001580	detection of chemical stimulus involved in sensory perception of bitter taste	1/221	29/17913	0.302529	0.586527	0.537733	RTP4	1
BP	GO:0002888	positive regulation of myeloid leukocyte mediated immunity	1/221	29/17913	0.302529	0.586527	0.537733	PTAFR	1
BP	GO:0003401	axis elongation	1/221	29/17913	0.302529	0.586527	0.537733	HOXD13	1
BP	GO:0010800	positive regulation of peptidyl-threonine phosphorylation	1/221	29/17913	0.302529	0.586527	0.537733	CAB39	1
BP	GO:0014044	Schwann cell development	1/221	29/17913	0.302529	0.586527	0.537733	POU3F1	1
BP	GO:0021602	cranial nerve morphogenesis	1/221	29/17913	0.302529	0.586527	0.537733	PAX2	1
BP	GO:0033006	regulation of mast cell activation involved in immune response	1/221	29/17913	0.302529	0.586527	0.537733	HMOX1	1
BP	GO:0033014	tetrapyrrole biosynthetic process	1/221	29/17913	0.302529	0.586527	0.537733	MMAA	1
BP	GO:0043457	regulation of cellular respiration	1/221	29/17913	0.302529	0.586527	0.537733	PRDM16	1
BP	GO:0045980	negative regulation of nucleotide metabolic process	1/221	29/17913	0.302529	0.586527	0.537733	NUPR1	1
BP	GO:0046627	negative regulation of insulin receptor signaling pathway	1/221	29/17913	0.302529	0.586527	0.537733	PRKCB	1
BP	GO:0050650	chondroitin sulfate proteoglycan biosynthetic process	1/221	29/17913	0.302529	0.586527	0.537733	BGN	1
BP	GO:0071549	cellular response to dexamethasone stimulus	1/221	29/17913	0.302529	0.586527	0.537733	FBXO32	1
BP	GO:0090162	establishment of epithelial cell polarity	1/221	29/17913	0.302529	0.586527	0.537733	SH3BP1	1
BP	GO:1903539	protein localization to postsynaptic membrane	1/221	29/17913	0.302529	0.586527	0.537733	RAPSN	1
BP	GO:1904994	regulation of leukocyte adhesion to vascular endothelial cell	1/221	29/17913	0.302529	0.586527	0.537733	PTAFR	1
BP	GO:2000727	positive regulation of cardiac muscle cell differentiation	1/221	29/17913	0.302529	0.586527	0.537733	GREM1	1
BP	GO:0050678	regulation of epithelial cell proliferation	6/221	369/17913	0.304745	0.590444	0.541324	PAX2/HMOX1/NODAL/FRS2/NUPR1/C5AR1	6
BP	GO:0035710	CD4-positive, alpha-beta T cell activation	2/221	90/17913	0.305102	0.590755	0.541609	MYB/NKX2-3	2
BP	GO:0060401	cytosolic calcium ion transport	3/221	157/17913	0.306068	0.592165	0.542902	ADCYAP1R1/CCR7/CXCL11	3
BP	GO:0042593	glucose homeostasis	4/221	227/17913	0.307609	0.592165	0.542902	PAX2/HNF1A/EPHA5/SLC2A4	4
BP	GO:0030900	forebrain development	6/221	371/17913	0.309052	0.592165	0.542902	LHX5/FGF8/ID2/EPHA5/FRS2/POU3F1	6
BP	GO:0001523	retinoid metabolic process	2/221	91/17913	0.309653	0.592165	0.542902	APOB/BCO1	2
BP	GO:0002708	positive regulation of lymphocyte mediated immunity	2/221	91/17913	0.309653	0.592165	0.542902	C17orf99/NCR3	2
BP	GO:0042632	cholesterol homeostasis	2/221	91/17913	0.309653	0.592165	0.542902	APOB/MALL	2
BP	GO:0045833	negative regulation of lipid metabolic process	2/221	91/17913	0.309653	0.592165	0.542902	FGF19/BSCL2	2
BP	GO:0060333	interferon-gamma-mediated signaling pathway	2/221	91/17913	0.309653	0.592165	0.542902	OASL/PTAFR	2
BP	GO:0090277	positive regulation of peptide hormone secretion	2/221	91/17913	0.309653	0.592165	0.542902	GIPR/ILDR1	2
BP	GO:0015850	organic hydroxy compound transport	4/221	228/17913	0.310388	0.592165	0.542902	APOB/SLC6A2/MYB/SLC16A7	4
BP	GO:0033500	carbohydrate homeostasis	4/221	228/17913	0.310388	0.592165	0.542902	PAX2/HNF1A/EPHA5/SLC2A4	4
BP	GO:0001569	branching involved in blood vessel morphogenesis	1/221	30/17913	0.311147	0.592165	0.542902	FGF8	1
BP	GO:0002828	regulation of type 2 immune response	1/221	30/17913	0.311147	0.592165	0.542902	CD74	1
BP	GO:0010586	miRNA metabolic process	1/221	30/17913	0.311147	0.592165	0.542902	AGO1	1
BP	GO:0010743	regulation of macrophage derived foam cell differentiation	1/221	30/17913	0.311147	0.592165	0.542902	APOB	1
BP	GO:0019433	triglyceride catabolic process	1/221	30/17913	0.311147	0.592165	0.542902	APOB	1
BP	GO:0021772	olfactory bulb development	1/221	30/17913	0.311147	0.592165	0.542902	ID2	1
BP	GO:0042168	heme metabolic process	1/221	30/17913	0.311147	0.592165	0.542902	HMOX1	1
BP	GO:0043372	positive regulation of CD4-positive, alpha-beta T cell differentiation	1/221	30/17913	0.311147	0.592165	0.542902	MYB	1
BP	GO:0045197	establishment or maintenance of epithelial cell apical/basal polarity	1/221	30/17913	0.311147	0.592165	0.542902	SH3BP1	1
BP	GO:0045939	negative regulation of steroid metabolic process	1/221	30/17913	0.311147	0.592165	0.542902	FGF19	1
BP	GO:0046596	regulation of viral entry into host cell	1/221	30/17913	0.311147	0.592165	0.542902	CD74	1
BP	GO:0050779	RNA destabilization	1/221	30/17913	0.311147	0.592165	0.542902	YTHDF3	1
BP	GO:0065005	protein-lipid complex assembly	1/221	30/17913	0.311147	0.592165	0.542902	APOB	1
BP	GO:0070050	neuron cellular homeostasis	1/221	30/17913	0.311147	0.592165	0.542902	SLC6A2	1
BP	GO:0071108	protein K48-linked deubiquitination	1/221	30/17913	0.311147	0.592165	0.542902	MINDY4B	1
BP	GO:2000142	regulation of DNA-templated transcription, initiation	1/221	30/17913	0.311147	0.592165	0.542902	HNF1A	1
BP	GO:0055001	muscle cell development	3/221	159/17913	0.312813	0.594957	0.545462	ACTN2/RIPOR2/KEL	3
BP	GO:0014020	primary neural tube formation	2/221	92/17913	0.314197	0.596835	0.547184	PAX2/NODAL	2
BP	GO:0055092	sterol homeostasis	2/221	92/17913	0.314197	0.596835	0.547184	APOB/MALL	2
BP	GO:0050663	cytokine secretion	4/221	230/17913	0.315953	0.597401	0.547702	CCR7/LRRC32/TMEM106A/ISG15	4
BP	GO:0002673	regulation of acute inflammatory response	3/221	160/17913	0.316186	0.597401	0.547702	CCR7/C5AR1/C2CD4A	3
BP	GO:0003012	muscle system process	7/221	448/17913	0.316783	0.597401	0.547702	ACTN2/HMOX1/TNNT2/PGAM2/PTAFR/TACR3/GATM	7
BP	GO:0032611	interleukin-1 beta production	2/221	93/17913	0.318735	0.597401	0.547702	CCR7/TMEM106A	2
BP	GO:0032649	regulation of interferon-gamma production	2/221	93/17913	0.318735	0.597401	0.547702	CCR7/ISG15	2
BP	GO:0035282	segmentation	2/221	93/17913	0.318735	0.597401	0.547702	FRS2/DLL1	2
BP	GO:0044070	regulation of anion transport	2/221	93/17913	0.318735	0.597401	0.547702	KMO/PTAFR	2
BP	GO:0045621	positive regulation of lymphocyte differentiation	2/221	93/17913	0.318735	0.597401	0.547702	CD74/MYB	2
BP	GO:0048010	vascular endothelial growth factor receptor signaling pathway	2/221	93/17913	0.318735	0.597401	0.547702	NCF2/PRKCB	2
BP	GO:0051591	response to cAMP	2/221	93/17913	0.318735	0.597401	0.547702	PTAFR/AGXT	2
BP	GO:0006536	glutamate metabolic process	1/221	31/17913	0.31966	0.597401	0.547702	SLC1A3	1
BP	GO:0015695	organic cation transport	1/221	31/17913	0.31966	0.597401	0.547702	AZIN2	1
BP	GO:0021988	olfactory lobe development	1/221	31/17913	0.31966	0.597401	0.547702	ID2	1
BP	GO:0033687	osteoblast proliferation	1/221	31/17913	0.31966	0.597401	0.547702	GREM1	1
BP	GO:0035587	purinergic receptor signaling pathway	1/221	31/17913	0.31966	0.597401	0.547702	PTAFR	1
BP	GO:0042572	retinol metabolic process	1/221	31/17913	0.31966	0.597401	0.547702	BCO1	1
BP	GO:0045920	negative regulation of exocytosis	1/221	31/17913	0.31966	0.597401	0.547702	HMOX1	1
BP	GO:0046466	membrane lipid catabolic process	1/221	31/17913	0.31966	0.597401	0.547702	ENPP7	1
BP	GO:0051955	regulation of amino acid transport	1/221	31/17913	0.31966	0.597401	0.547702	KMO	1
BP	GO:0097502	mannosylation	1/221	31/17913	0.31966	0.597401	0.547702	FKTN	1
BP	GO:1900077	negative regulation of cellular response to insulin stimulus	1/221	31/17913	0.31966	0.597401	0.547702	PRKCB	1
BP	GO:1902186	regulation of viral release from host cell	1/221	31/17913	0.31966	0.597401	0.547702	TRIM32	1
BP	GO:1902253	regulation of intrinsic apoptotic signaling pathway by p53 class mediator	1/221	31/17913	0.31966	0.597401	0.547702	CD74	1
BP	GO:1903432	regulation of TORC1 signaling	1/221	31/17913	0.31966	0.597401	0.547702	RNF152	1
BP	GO:1903978	regulation of microglial cell activation	1/221	31/17913	0.31966	0.597401	0.547702	C5AR1	1
BP	GO:1904893	negative regulation of STAT cascade	1/221	31/17913	0.31966	0.597401	0.547702	LEPROT	1
BP	GO:0051302	regulation of cell division	3/221	162/17913	0.322936	0.600779	0.550799	FGF8/PDGFC/DLL1	3
BP	GO:0099504	synaptic vesicle cycle	3/221	162/17913	0.322936	0.600779	0.550799	DDC/PRKCB/SLC2A4	3
BP	GO:0007189	adenylate cyclase-activating G protein-coupled receptor signaling pathway	2/221	94/17913	0.323266	0.600779	0.550799	TSHR/CXCL11	2
BP	GO:0007229	integrin-mediated signaling pathway	2/221	94/17913	0.323266	0.600779	0.550799	ITGB7/ISG15	2
BP	GO:0031109	microtubule polymerization or depolymerization	2/221	94/17913	0.323266	0.600779	0.550799	TUBB4A/SKA1	2
BP	GO:0043255	regulation of carbohydrate biosynthetic process	2/221	94/17913	0.323266	0.600779	0.550799	ADCYAP1R1/PTAFR	2
BP	GO:1990823	response to leukemia inhibitory factor	2/221	94/17913	0.323266	0.600779	0.550799	PADI2/ILDR1	2
BP	GO:1990830	cellular response to leukemia inhibitory factor	2/221	94/17913	0.323266	0.600779	0.550799	PADI2/ILDR1	2
BP	GO:2001243	negative regulation of intrinsic apoptotic signaling pathway	2/221	94/17913	0.323266	0.600779	0.550799	CD74/TRIM32	2
BP	GO:2001242	regulation of intrinsic apoptotic signaling pathway	3/221	163/17913	0.326312	0.60226	0.552157	CD74/TRIM32/NUPR1	3
BP	GO:0030217	T cell differentiation	4/221	234/17913	0.32711	0.60226	0.552157	CD74/MYB/NKX2-3/CCR7	4
BP	GO:0032412	regulation of ion transmembrane transporter activity	4/221	234/17913	0.32711	0.60226	0.552157	CACNG4/ACTN2/CAB39/PTAFR	4
BP	GO:0006641	triglyceride metabolic process	2/221	95/17913	0.327789	0.60226	0.552157	APOB/NKX2-3	2
BP	GO:0008585	female gonad development	2/221	95/17913	0.327789	0.60226	0.552157	PCYT1B/NUPR1	2
BP	GO:0050810	regulation of steroid biosynthetic process	2/221	95/17913	0.327789	0.60226	0.552157	APOB/FGF19	2
BP	GO:0001975	response to amphetamine	1/221	32/17913	0.328069	0.60226	0.552157	RGS17	1
BP	GO:0007190	activation of adenylate cyclase activity	1/221	32/17913	0.328069	0.60226	0.552157	GIPR	1
BP	GO:0031111	negative regulation of microtubule polymerization or depolymerization	1/221	32/17913	0.328069	0.60226	0.552157	TUBB4A	1
BP	GO:0043368	positive T cell selection	1/221	32/17913	0.328069	0.60226	0.552157	CD74	1
BP	GO:0043552	positive regulation of phosphatidylinositol 3-kinase activity	1/221	32/17913	0.328069	0.60226	0.552157	CCR7	1
BP	GO:0045745	positive regulation of G protein-coupled receptor signaling pathway	1/221	32/17913	0.328069	0.60226	0.552157	FGF8	1
BP	GO:0046685	response to arsenic-containing substance	1/221	32/17913	0.328069	0.60226	0.552157	HMOX1	1
BP	GO:0051693	actin filament capping	1/221	32/17913	0.328069	0.60226	0.552157	SPTB	1
BP	GO:0060317	cardiac epithelial to mesenchymal transition	1/221	32/17913	0.328069	0.60226	0.552157	FGF8	1
BP	GO:0097421	liver regeneration	1/221	32/17913	0.328069	0.60226	0.552157	HMOX1	1
BP	GO:1901099	negative regulation of signal transduction in absence of ligand	1/221	32/17913	0.328069	0.60226	0.552157	IFI6	1
BP	GO:1903955	positive regulation of protein targeting to mitochondrion	1/221	32/17913	0.328069	0.60226	0.552157	LEPROT	1
BP	GO:1990774	tumor necrosis factor secretion	1/221	32/17913	0.328069	0.60226	0.552157	TMEM106A	1
BP	GO:2001240	negative regulation of extrinsic apoptotic signaling pathway in absence of ligand	1/221	32/17913	0.328069	0.60226	0.552157	IFI6	1
BP	GO:0006937	regulation of muscle contraction	3/221	164/17913	0.329687	0.604494	0.554205	TNNT2/PTAFR/TACR3	3
BP	GO:0045619	regulation of lymphocyte differentiation	3/221	164/17913	0.329687	0.604494	0.554205	CD74/ID2/MYB	3
BP	GO:0007044	cell-substrate junction assembly	2/221	96/17913	0.332304	0.606151	0.555724	ACTN2/GREM1	2
BP	GO:0010660	regulation of muscle cell apoptotic process	2/221	96/17913	0.332304	0.606151	0.555724	HMOX1/NUPR1	2
BP	GO:0018958	phenol-containing compound metabolic process	2/221	96/17913	0.332304	0.606151	0.555724	DDC/TACR3	2
BP	GO:0046928	regulation of neurotransmitter secretion	2/221	96/17913	0.332304	0.606151	0.555724	KMO/PRKCB	2
BP	GO:1901570	fatty acid derivative biosynthetic process	2/221	96/17913	0.332304	0.606151	0.555724	CD74/HMGCLL1	2
BP	GO:0002237	response to molecule of bacterial origin	5/221	309/17913	0.333963	0.606151	0.555724	APOB/KMO/CCR7/PTAFR/C5AR1	5
BP	GO:0048863	stem cell differentiation	4/221	237/17913	0.335494	0.606151	0.555724	PAX2/MYB/TBX2/GREM1	4
BP	GO:0071453	cellular response to oxygen levels	4/221	237/17913	0.335494	0.606151	0.555724	HMOX1/EGLN3/SLC2A4/MDM4	4
BP	GO:0002385	mucosal immune response	1/221	33/17913	0.336373	0.606151	0.555724	C17orf99	1
BP	GO:0006040	amino sugar metabolic process	1/221	33/17913	0.336373	0.606151	0.555724	CHST5	1
BP	GO:0010039	response to iron ion	1/221	33/17913	0.336373	0.606151	0.555724	HMOX1	1
BP	GO:0030947	regulation of vascular endothelial growth factor receptor signaling pathway	1/221	33/17913	0.336373	0.606151	0.555724	PRKCB	1
BP	GO:0032892	positive regulation of organic acid transport	1/221	33/17913	0.336373	0.606151	0.555724	KMO	1
BP	GO:0042339	keratan sulfate metabolic process	1/221	33/17913	0.336373	0.606151	0.555724	CHST5	1
BP	GO:0042554	superoxide anion generation	1/221	33/17913	0.336373	0.606151	0.555724	NCF2	1
BP	GO:0042558	pteridine-containing compound metabolic process	1/221	33/17913	0.336373	0.606151	0.555724	ALDH1L2	1
BP	GO:0043516	regulation of DNA damage response, signal transduction by p53 class mediator	1/221	33/17913	0.336373	0.606151	0.555724	CD74	1
BP	GO:0048011	neurotrophin TRK receptor signaling pathway	1/221	33/17913	0.336373	0.606151	0.555724	FRS2	1
BP	GO:0048665	neuron fate specification	1/221	33/17913	0.336373	0.606151	0.555724	DLL1	1
BP	GO:0051954	positive regulation of amine transport	1/221	33/17913	0.336373	0.606151	0.555724	KMO	1
BP	GO:0097242	amyloid-beta clearance	1/221	33/17913	0.336373	0.606151	0.555724	C5AR1	1
BP	GO:1901797	negative regulation of signal transduction by p53 class mediator	1/221	33/17913	0.336373	0.606151	0.555724	CD74	1
BP	GO:1902742	apoptotic process involved in development	1/221	33/17913	0.336373	0.606151	0.555724	PAX2	1
BP	GO:2000785	regulation of autophagosome assembly	1/221	33/17913	0.336373	0.606151	0.555724	NUPR1	1
BP	GO:0051188	cofactor biosynthetic process	5/221	310/17913	0.336398	0.606151	0.555724	KMO/CHAC1/MMAA/PGAM2/NUPR1	5
BP	GO:0016241	regulation of macroautophagy	3/221	166/17913	0.336437	0.606151	0.555724	HMOX1/ATP6V0E2/NUPR1	3
BP	GO:0021543	pallium development	3/221	166/17913	0.336437	0.606151	0.555724	LHX5/FGF8/EPHA5	3
BP	GO:0030307	positive regulation of cell growth	3/221	166/17913	0.336437	0.606151	0.555724	TRIM32/CDKN2AIP/HIST1H1B	3
BP	GO:0120032	regulation of plasma membrane bounded cell projection assembly	3/221	166/17913	0.336437	0.606151	0.555724	RIPOR2/CCR7/CDC42EP5	3
BP	GO:0016101	diterpenoid metabolic process	2/221	97/17913	0.336811	0.606461	0.556009	APOB/BCO1	2
BP	GO:0033044	regulation of chromosome organization	5/221	311/17913	0.338834	0.609739	0.559013	PADI2/MYB/TET1/HIST1H1B/PINX1	5
BP	GO:0030308	negative regulation of cell growth	3/221	167/17913	0.339811	0.610401	0.55962	ACVR1B/GREM1/CDKN2AIP	3
BP	GO:0033209	tumor necrosis factor-mediated signaling pathway	3/221	167/17913	0.339811	0.610401	0.55962	TRIM32/CD70/HIPK1	3
BP	GO:0071248	cellular response to metal ion	3/221	167/17913	0.339811	0.610401	0.55962	HMOX1/ID2/MT1F	3
BP	GO:1904062	regulation of cation transmembrane transport	5/221	312/17913	0.341272	0.610931	0.560107	CACNG4/ACTN2/CAB39/CXCL11/KEL	5
BP	GO:0010522	regulation of calcium ion transport into cytosol	2/221	98/17913	0.341308	0.610931	0.560107	ADCYAP1R1/CXCL11	2
BP	GO:0021549	cerebellum development	2/221	98/17913	0.341308	0.610931	0.560107	LHX5/DLL1	2
BP	GO:0032006	regulation of TOR signaling	2/221	98/17913	0.341308	0.610931	0.560107	DEPTOR/RNF152	2
BP	GO:0099175	regulation of postsynapse organization	2/221	98/17913	0.341308	0.610931	0.560107	PAK3/RAPSN	2
BP	GO:0060491	regulation of cell projection assembly	3/221	168/17913	0.343183	0.610931	0.560107	RIPOR2/CCR7/CDC42EP5	3
BP	GO:0043062	extracellular structure organization	6/221	387/17913	0.343841	0.610931	0.560107	APOB/ITGB7/GREM1/KLK7/BGN/DPP4	6
BP	GO:0007435	salivary gland morphogenesis	1/221	34/17913	0.344576	0.610931	0.560107	FGF8	1
BP	GO:0010259	multicellular organism aging	1/221	34/17913	0.344576	0.610931	0.560107	DDC	1
BP	GO:0014072	response to isoquinoline alkaloid	1/221	34/17913	0.344576	0.610931	0.560107	TACR3	1
BP	GO:0032735	positive regulation of interleukin-12 production	1/221	34/17913	0.344576	0.610931	0.560107	CCR7	1
BP	GO:0035088	establishment or maintenance of apical/basal cell polarity	1/221	34/17913	0.344576	0.610931	0.560107	SH3BP1	1
BP	GO:0043276	anoikis	1/221	34/17913	0.344576	0.610931	0.560107	CEACAM5	1
BP	GO:0043278	response to morphine	1/221	34/17913	0.344576	0.610931	0.560107	TACR3	1
BP	GO:0045730	respiratory burst	1/221	34/17913	0.344576	0.610931	0.560107	NCF2	1
BP	GO:0048536	spleen development	1/221	34/17913	0.344576	0.610931	0.560107	NKX2-3	1
BP	GO:0048566	embryonic digestive tract development	1/221	34/17913	0.344576	0.610931	0.560107	ID2	1
BP	GO:0050849	negative regulation of calcium-mediated signaling	1/221	34/17913	0.344576	0.610931	0.560107	SLA2	1
BP	GO:0050913	sensory perception of bitter taste	1/221	34/17913	0.344576	0.610931	0.560107	RTP4	1
BP	GO:0051180	vitamin transport	1/221	34/17913	0.344576	0.610931	0.560107	TCN1	1
BP	GO:0061245	establishment or maintenance of bipolar cell polarity	1/221	34/17913	0.344576	0.610931	0.560107	SH3BP1	1
BP	GO:0097352	autophagosome maturation	1/221	34/17913	0.344576	0.610931	0.560107	CLN3	1
BP	GO:0046632	alpha-beta T cell differentiation	2/221	99/17913	0.345797	0.61124	0.56039	MYB/NKX2-3	2
BP	GO:0070301	cellular response to hydrogen peroxide	2/221	99/17913	0.345797	0.61124	0.56039	PAX2/MYB	2
BP	GO:0098869	cellular oxidant detoxification	2/221	99/17913	0.345797	0.61124	0.56039	HBA2/HBA1	2
BP	GO:1902106	negative regulation of leukocyte differentiation	2/221	99/17913	0.345797	0.61124	0.56039	CD74/ID2	2
BP	GO:0046328	regulation of JNK cascade	3/221	169/17913	0.346555	0.61124	0.56039	FKTN/CCR7/FGF19	3
BP	GO:0050796	regulation of insulin secretion	3/221	169/17913	0.346555	0.61124	0.56039	GIPR/EPHA5/DPP4	3
BP	GO:2001252	positive regulation of chromosome organization	3/221	169/17913	0.346555	0.61124	0.56039	MYB/TET1/HIST1H1B	3
BP	GO:0006836	neurotransmitter transport	4/221	241/17913	0.346687	0.61124	0.56039	SLC1A3/KMO/DDC/PRKCB	4
BP	GO:0051896	regulation of protein kinase B signaling	4/221	241/17913	0.346687	0.61124	0.56039	FGF8/CCR7/FGF19/FRS2	4
BP	GO:0070482	response to oxygen levels	6/221	389/17913	0.348221	0.61124	0.56039	HMOX1/MYB/EGLN3/SLC2A4/DPP4/MDM4	6
BP	GO:0022898	regulation of transmembrane transporter activity	4/221	242/17913	0.349486	0.61124	0.56039	CACNG4/ACTN2/CAB39/PTAFR	4
BP	GO:0048771	tissue remodeling	3/221	170/17913	0.349925	0.61124	0.56039	FGF8/GREM1/BGN	3
BP	GO:0001841	neural tube formation	2/221	100/17913	0.350275	0.61124	0.56039	PAX2/NODAL	2
BP	GO:0010657	muscle cell apoptotic process	2/221	100/17913	0.350275	0.61124	0.56039	HMOX1/NUPR1	2
BP	GO:2001237	negative regulation of extrinsic apoptotic signaling pathway	2/221	100/17913	0.350275	0.61124	0.56039	HMOX1/IFI6	2
BP	GO:0001893	maternal placenta development	1/221	35/17913	0.352677	0.61124	0.56039	NODAL	1
BP	GO:0002701	negative regulation of production of molecular mediator of immune response	1/221	35/17913	0.352677	0.61124	0.56039	HMOX1	1
BP	GO:0003230	cardiac atrium development	1/221	35/17913	0.352677	0.61124	0.56039	MDM4	1
BP	GO:0007157	heterophilic cell-cell adhesion via plasma membrane cell adhesion molecules	1/221	35/17913	0.352677	0.61124	0.56039	CEACAM5	1
BP	GO:0009395	phospholipid catabolic process	1/221	35/17913	0.352677	0.61124	0.56039	ENPP7	1
BP	GO:0010762	regulation of fibroblast migration	1/221	35/17913	0.352677	0.61124	0.56039	PAK3	1
BP	GO:0019076	viral release from host cell	1/221	35/17913	0.352677	0.61124	0.56039	TRIM32	1
BP	GO:0030224	monocyte differentiation	1/221	35/17913	0.352677	0.61124	0.56039	CD74	1
BP	GO:0035137	hindlimb morphogenesis	1/221	35/17913	0.352677	0.61124	0.56039	FGF8	1
BP	GO:0035890	exit from host	1/221	35/17913	0.352677	0.61124	0.56039	TRIM32	1
BP	GO:0035891	exit from host cell	1/221	35/17913	0.352677	0.61124	0.56039	TRIM32	1
BP	GO:0042092	type 2 immune response	1/221	35/17913	0.352677	0.61124	0.56039	CD74	1
BP	GO:0045622	regulation of T-helper cell differentiation	1/221	35/17913	0.352677	0.61124	0.56039	MYB	1
BP	GO:0048246	macrophage chemotaxis	1/221	35/17913	0.352677	0.61124	0.56039	C5AR1	1
BP	GO:0050775	positive regulation of dendrite morphogenesis	1/221	35/17913	0.352677	0.61124	0.56039	PAK3	1
BP	GO:0050912	detection of chemical stimulus involved in sensory perception of taste	1/221	35/17913	0.352677	0.61124	0.56039	RTP4	1
BP	GO:0052126	movement in host environment	1/221	35/17913	0.352677	0.61124	0.56039	TRIM32	1
BP	GO:0052192	movement in environment of other organism involved in symbiotic interaction	1/221	35/17913	0.352677	0.61124	0.56039	TRIM32	1
BP	GO:0060416	response to growth hormone	1/221	35/17913	0.352677	0.61124	0.56039	LEPROT	1
BP	GO:0061077	chaperone-mediated protein folding	1/221	35/17913	0.352677	0.61124	0.56039	CD74	1
BP	GO:0071312	cellular response to alkaloid	1/221	35/17913	0.352677	0.61124	0.56039	DDC	1
BP	GO:0071542	dopaminergic neuron differentiation	1/221	35/17913	0.352677	0.61124	0.56039	FGF8	1
BP	GO:1903131	mononuclear cell differentiation	1/221	35/17913	0.352677	0.61124	0.56039	CD74	1
BP	GO:2000310	regulation of NMDA receptor activity	1/221	35/17913	0.352677	0.61124	0.56039	ACTN2	1
BP	GO:0002042	cell migration involved in sprouting angiogenesis	2/221	101/17913	0.354743	0.612761	0.561785	HMOX1/GREM1	2
BP	GO:0002367	cytokine production involved in immune response	2/221	101/17913	0.354743	0.612761	0.561785	CD74/HMOX1	2
BP	GO:0045926	negative regulation of growth	4/221	244/17913	0.355087	0.612761	0.561785	ACVR1B/GREM1/CDKN2AIP/MT1F	4
BP	GO:0007163	establishment or maintenance of cell polarity	3/221	172/17913	0.356659	0.612761	0.561785	SH3BP1/RIPOR2/CCR7	3
BP	GO:0050804	modulation of chemical synaptic transmission	6/221	393/17913	0.356998	0.612761	0.561785	CACNG4/SLC1A3/KMO/SLC8A2/RAPSN/PRKCB	6
BP	GO:0042742	defense response to bacterium	4/221	245/17913	0.357887	0.612761	0.561785	KLK7/IFNE/ISG15/C5AR1	4
BP	GO:0050730	regulation of peptidyl-tyrosine phosphorylation	4/221	245/17913	0.357887	0.612761	0.561785	CD74/FGF8/PDGFC/GREM1	4
BP	GO:0099177	regulation of trans-synaptic signaling	6/221	394/17913	0.359195	0.612761	0.561785	CACNG4/SLC1A3/KMO/SLC8A2/RAPSN/PRKCB	6
BP	GO:0006275	regulation of DNA replication	2/221	102/17913	0.3592	0.612761	0.561785	ENPP7/DACH1	2
BP	GO:0021510	spinal cord development	2/221	102/17913	0.3592	0.612761	0.561785	LHX5/DLL1	2
BP	GO:0032963	collagen metabolic process	2/221	102/17913	0.3592	0.612761	0.561785	MYB/PRTN3	2
BP	GO:0097006	regulation of plasma lipoprotein particle levels	2/221	102/17913	0.3592	0.612761	0.561785	APOB/HMOX1	2
BP	GO:0019724	B cell mediated immunity	3/221	173/17913	0.360022	0.612761	0.561785	CD74/SLA2/C17orf99	3
BP	GO:0000578	embryonic axis specification	1/221	36/17913	0.360679	0.612761	0.561785	FRS2	1
BP	GO:0002251	organ or tissue specific immune response	1/221	36/17913	0.360679	0.612761	0.561785	C17orf99	1
BP	GO:0006007	glucose catabolic process	1/221	36/17913	0.360679	0.612761	0.561785	PGAM2	1
BP	GO:0006734	NADH metabolic process	1/221	36/17913	0.360679	0.612761	0.561785	PGAM2	1
BP	GO:0008156	negative regulation of DNA replication	1/221	36/17913	0.360679	0.612761	0.561785	ENPP7	1
BP	GO:0010742	macrophage derived foam cell differentiation	1/221	36/17913	0.360679	0.612761	0.561785	APOB	1
BP	GO:0015682	ferric iron transport	1/221	36/17913	0.360679	0.612761	0.561785	ATP6V0E2	1
BP	GO:0032205	negative regulation of telomere maintenance	1/221	36/17913	0.360679	0.612761	0.561785	PINX1	1
BP	GO:0033144	negative regulation of intracellular steroid hormone receptor signaling pathway	1/221	36/17913	0.360679	0.612761	0.561785	NODAL	1
BP	GO:0033572	transferrin transport	1/221	36/17913	0.360679	0.612761	0.561785	ATP6V0E2	1
BP	GO:0043114	regulation of vascular permeability	1/221	36/17913	0.360679	0.612761	0.561785	C2CD4A	1
BP	GO:0043243	positive regulation of protein complex disassembly	1/221	36/17913	0.360679	0.612761	0.561785	ACTN2	1
BP	GO:0045776	negative regulation of blood pressure	1/221	36/17913	0.360679	0.612761	0.561785	PTAFR	1
BP	GO:0046825	regulation of protein export from nucleus	1/221	36/17913	0.360679	0.612761	0.561785	IFI27	1
BP	GO:0051973	positive regulation of telomerase activity	1/221	36/17913	0.360679	0.612761	0.561785	GREM1	1
BP	GO:0060251	regulation of glial cell proliferation	1/221	36/17913	0.360679	0.612761	0.561785	MYB	1
BP	GO:0072512	trivalent inorganic cation transport	1/221	36/17913	0.360679	0.612761	0.561785	ATP6V0E2	1
BP	GO:0090077	foam cell differentiation	1/221	36/17913	0.360679	0.612761	0.561785	APOB	1
BP	GO:0090218	positive regulation of lipid kinase activity	1/221	36/17913	0.360679	0.612761	0.561785	CCR7	1
BP	GO:1905521	regulation of macrophage migration	1/221	36/17913	0.360679	0.612761	0.561785	C5AR1	1
BP	GO:2000516	positive regulation of CD4-positive, alpha-beta T cell activation	1/221	36/17913	0.360679	0.612761	0.561785	MYB	1
BP	GO:0021537	telencephalon development	4/221	246/17913	0.360688	0.612761	0.561785	LHX5/FGF8/ID2/EPHA5	4
BP	GO:0007611	learning or memory	4/221	247/17913	0.363488	0.617089	0.565752	SLC8A2/SLC24A2/GATM/CLN3	4
BP	GO:0071887	leukocyte apoptotic process	2/221	103/17913	0.363645	0.617089	0.565752	CD74/CCR7	2
BP	GO:0031589	cell-substrate adhesion	5/221	322/17913	0.365707	0.617109	0.565771	ACTN2/CCR7/ITGB7/RADIL/GREM1	5
BP	GO:0071902	positive regulation of protein serine/threonine kinase activity	5/221	322/17913	0.365707	0.617109	0.565771	CD74/PAK3/CAB39/FRS2/C5AR1	5
BP	GO:2001233	regulation of apoptotic signaling pathway	6/221	397/17913	0.365791	0.617109	0.565771	CD74/HMOX1/TRIM32/IFI6/DEPTOR/NUPR1	6
BP	GO:0001662	behavioral fear response	1/221	37/17913	0.368583	0.617109	0.565771	DPP4	1
BP	GO:0001941	postsynaptic membrane organization	1/221	37/17913	0.368583	0.617109	0.565771	RAPSN	1
BP	GO:0002714	positive regulation of B cell mediated immunity	1/221	37/17913	0.368583	0.617109	0.565771	C17orf99	1
BP	GO:0002891	positive regulation of immunoglobulin mediated immune response	1/221	37/17913	0.368583	0.617109	0.565771	C17orf99	1
BP	GO:0006778	porphyrin-containing compound metabolic process	1/221	37/17913	0.368583	0.617109	0.565771	HMOX1	1
BP	GO:0010955	negative regulation of protein processing	1/221	37/17913	0.368583	0.617109	0.565771	CHAC1	1
BP	GO:0014037	Schwann cell differentiation	1/221	37/17913	0.368583	0.617109	0.565771	POU3F1	1
BP	GO:0030574	collagen catabolic process	1/221	37/17913	0.368583	0.617109	0.565771	PRTN3	1
BP	GO:0042181	ketone biosynthetic process	1/221	37/17913	0.368583	0.617109	0.565771	HSD17B3	1
BP	GO:0045214	sarcomere organization	1/221	37/17913	0.368583	0.617109	0.565771	ACTN2	1
BP	GO:0046006	regulation of activated T cell proliferation	1/221	37/17913	0.368583	0.617109	0.565771	LRRC32	1
BP	GO:0046326	positive regulation of glucose import	1/221	37/17913	0.368583	0.617109	0.565771	FGF19	1
BP	GO:0046461	neutral lipid catabolic process	1/221	37/17913	0.368583	0.617109	0.565771	APOB	1
BP	GO:0046464	acylglycerol catabolic process	1/221	37/17913	0.368583	0.617109	0.565771	APOB	1
BP	GO:0048488	synaptic vesicle endocytosis	1/221	37/17913	0.368583	0.617109	0.565771	SLC2A4	1
BP	GO:0051590	positive regulation of neurotransmitter transport	1/221	37/17913	0.368583	0.617109	0.565771	KMO	1
BP	GO:0051930	regulation of sensory perception of pain	1/221	37/17913	0.368583	0.617109	0.565771	PTAFR	1
BP	GO:0097120	receptor localization to synapse	1/221	37/17913	0.368583	0.617109	0.565771	ANKS1B	1
BP	GO:0140238	presynaptic endocytosis	1/221	37/17913	0.368583	0.617109	0.565771	SLC2A4	1
BP	GO:1901381	positive regulation of potassium ion transmembrane transport	1/221	37/17913	0.368583	0.617109	0.565771	ACTN2	1
BP	GO:1903318	negative regulation of protein maturation	1/221	37/17913	0.368583	0.617109	0.565771	CHAC1	1
BP	GO:0045861	negative regulation of proteolysis	5/221	324/17913	0.370601	0.620144	0.568553	ANOS1/PAX2/IFI6/CHAC1/CLN3	5
BP	GO:0043406	positive regulation of MAP kinase activity	4/221	250/17913	0.371885	0.621367	0.569674	CD74/PAK3/FRS2/C5AR1	4
BP	GO:0006939	smooth muscle contraction	2/221	105/17913	0.372502	0.621367	0.569674	PTAFR/TACR3	2
BP	GO:0032609	interferon-gamma production	2/221	105/17913	0.372502	0.621367	0.569674	CCR7/ISG15	2
BP	GO:0055076	transition metal ion homeostasis	2/221	105/17913	0.372502	0.621367	0.569674	CP/HMOX1	2
BP	GO:0090257	regulation of muscle system process	4/221	251/17913	0.374682	0.621367	0.569674	TNNT2/FBXO32/PTAFR/TACR3	4
BP	GO:0002209	behavioral defense response	1/221	38/17913	0.376389	0.621367	0.569674	DPP4	1
BP	GO:0006656	phosphatidylcholine biosynthetic process	1/221	38/17913	0.376389	0.621367	0.569674	PCYT1B	1
BP	GO:0007223	Wnt signaling pathway, calcium modulating pathway	1/221	38/17913	0.376389	0.621367	0.569674	AGO1	1
BP	GO:0007431	salivary gland development	1/221	38/17913	0.376389	0.621367	0.569674	FGF8	1
BP	GO:0007520	myoblast fusion	1/221	38/17913	0.376389	0.621367	0.569674	RIPOR2	1
BP	GO:0010667	negative regulation of cardiac muscle cell apoptotic process	1/221	38/17913	0.376389	0.621367	0.569674	NUPR1	1
BP	GO:0016572	histone phosphorylation	1/221	38/17913	0.376389	0.621367	0.569674	PRKCB	1
BP	GO:0038202	TORC1 signaling	1/221	38/17913	0.376389	0.621367	0.569674	RNF152	1
BP	GO:0044088	regulation of vacuole organization	1/221	38/17913	0.376389	0.621367	0.569674	NUPR1	1
BP	GO:0046329	negative regulation of JNK cascade	1/221	38/17913	0.376389	0.621367	0.569674	FKTN	1
BP	GO:0047496	vesicle transport along microtubule	1/221	38/17913	0.376389	0.621367	0.569674	CLN3	1
BP	GO:0051931	regulation of sensory perception	1/221	38/17913	0.376389	0.621367	0.569674	PTAFR	1
BP	GO:0072583	clathrin-dependent endocytosis	1/221	38/17913	0.376389	0.621367	0.569674	DLL1	1
BP	GO:0090050	positive regulation of cell migration involved in sprouting angiogenesis	1/221	38/17913	0.376389	0.621367	0.569674	HMOX1	1
BP	GO:0097178	ruffle assembly	1/221	38/17913	0.376389	0.621367	0.569674	SH3BP1	1
BP	GO:1902042	negative regulation of extrinsic apoptotic signaling pathway via death domain receptors	1/221	38/17913	0.376389	0.621367	0.569674	HMOX1	1
BP	GO:0019216	regulation of lipid metabolic process	6/221	402/17913	0.376798	0.621367	0.569674	APOB/SLA2/ID2/CCR7/FGF19/BSCL2	6
BP	GO:0006721	terpenoid metabolic process	2/221	106/17913	0.376911	0.621367	0.569674	APOB/BCO1	2
BP	GO:0019730	antimicrobial humoral response	2/221	106/17913	0.376911	0.621367	0.569674	KLK7/PRTN3	2
BP	GO:0021761	limbic system development	2/221	106/17913	0.376911	0.621367	0.569674	LHX5/EPHA5	2
BP	GO:0030330	DNA damage response, signal transduction by p53 class mediator	2/221	106/17913	0.376911	0.621367	0.569674	CD74/MDM4	2
BP	GO:0098693	regulation of synaptic vesicle cycle	2/221	106/17913	0.376911	0.621367	0.569674	PRKCB/SLC2A4	2
BP	GO:0051052	regulation of DNA metabolic process	6/221	403/17913	0.379	0.623643	0.571761	PAK3/TET1/GREM1/ENPP7/PINX1/DACH1	6
BP	GO:0019362	pyridine nucleotide metabolic process	3/221	179/17913	0.380145	0.623643	0.571761	KMO/PGAM2/NUPR1	3
BP	GO:0035265	organ growth	3/221	179/17913	0.380145	0.623643	0.571761	FGF8/TBX2/DLL1	3
BP	GO:0046496	nicotinamide nucleotide metabolic process	3/221	179/17913	0.380145	0.623643	0.571761	KMO/PGAM2/NUPR1	3
BP	GO:1901796	regulation of signal transduction by p53 class mediator	3/221	179/17913	0.380145	0.623643	0.571761	CD74/HIPK1/MDM4	3
BP	GO:0043434	response to peptide hormone	6/221	404/17913	0.381203	0.623643	0.571761	ACTN2/TSHR/PRKCB/ATP6V0E2/SLC2A4/LEPROT	6
BP	GO:0022037	metencephalon development	2/221	107/17913	0.381308	0.623643	0.571761	LHX5/DLL1	2
BP	GO:0050905	neuromuscular process	2/221	107/17913	0.381308	0.623643	0.571761	SLC1A3/CLN3	2
BP	GO:0062014	negative regulation of small molecule metabolic process	2/221	107/17913	0.381308	0.623643	0.571761	FGF19/NUPR1	2
BP	GO:1990748	cellular detoxification	2/221	107/17913	0.381308	0.623643	0.571761	HBA2/HBA1	2
BP	GO:0000096	sulfur amino acid metabolic process	1/221	39/17913	0.384099	0.623643	0.571761	AGXT	1
BP	GO:0001504	neurotransmitter uptake	1/221	39/17913	0.384099	0.623643	0.571761	SLC1A3	1
BP	GO:0021532	neural tube patterning	1/221	39/17913	0.384099	0.623643	0.571761	FGF8	1
BP	GO:0030204	chondroitin sulfate metabolic process	1/221	39/17913	0.384099	0.623643	0.571761	BGN	1
BP	GO:0030501	positive regulation of bone mineralization	1/221	39/17913	0.384099	0.623643	0.571761	ISG15	1
BP	GO:0030890	positive regulation of B cell proliferation	1/221	39/17913	0.384099	0.623643	0.571761	CD74	1
BP	GO:0033003	regulation of mast cell activation	1/221	39/17913	0.384099	0.623643	0.571761	HMOX1	1
BP	GO:0038179	neurotrophin signaling pathway	1/221	39/17913	0.384099	0.623643	0.571761	FRS2	1
BP	GO:0042269	regulation of natural killer cell mediated cytotoxicity	1/221	39/17913	0.384099	0.623643	0.571761	NCR3	1
BP	GO:0042596	fear response	1/221	39/17913	0.384099	0.623643	0.571761	DPP4	1
BP	GO:0045616	regulation of keratinocyte differentiation	1/221	39/17913	0.384099	0.623643	0.571761	CDSN	1
BP	GO:0045746	negative regulation of Notch signaling pathway	1/221	39/17913	0.384099	0.623643	0.571761	CHAC1	1
BP	GO:0045823	positive regulation of heart contraction	1/221	39/17913	0.384099	0.623643	0.571761	TACR3	1
BP	GO:0048713	regulation of oligodendrocyte differentiation	1/221	39/17913	0.384099	0.623643	0.571761	ID2	1
BP	GO:0060045	positive regulation of cardiac muscle cell proliferation	1/221	39/17913	0.384099	0.623643	0.571761	TBX2	1
BP	GO:0060119	inner ear receptor cell development	1/221	39/17913	0.384099	0.623643	0.571761	RIPOR2	1
BP	GO:1902116	negative regulation of organelle assembly	1/221	39/17913	0.384099	0.623643	0.571761	NUPR1	1
BP	GO:2000826	regulation of heart morphogenesis	1/221	39/17913	0.384099	0.623643	0.571761	TBX2	1
BP	GO:0030282	bone mineralization	2/221	108/17913	0.385692	0.625155	0.573147	GREM1/ISG15	2
BP	GO:0032612	interleukin-1 production	2/221	108/17913	0.385692	0.625155	0.573147	CCR7/TMEM106A	2
BP	GO:0071156	regulation of cell cycle arrest	2/221	108/17913	0.385692	0.625155	0.573147	ID2/MDM4	2
BP	GO:0007204	positive regulation of cytosolic calcium ion concentration	4/221	255/17913	0.385862	0.625155	0.573147	GIPR/ADCYAP1R1/CCR7/CXCL11	4
BP	GO:0002040	sprouting angiogenesis	3/221	181/17913	0.386825	0.625882	0.573814	HMOX1/GREM1/DLL1	3
BP	GO:0051099	positive regulation of binding	3/221	181/17913	0.386825	0.625882	0.573814	MFNG/RIPOR2/PINX1	3
BP	GO:0002791	regulation of peptide secretion	7/221	483/17913	0.386935	0.625882	0.573814	GIPR/CD74/CCR7/LRRC32/ILDR1/EPHA5/DPP4	7
BP	GO:0007596	blood coagulation	5/221	331/17913	0.387732	0.626834	0.574686	PRKCB/CYP4F11/PRTN3/HIST1H3F/HIST1H3C	5
BP	GO:0043618	regulation of transcription from RNA polymerase II promoter in response to stress	2/221	109/17913	0.390063	0.628876	0.576559	HMOX1/EGLN3	2
BP	GO:0043534	blood vessel endothelial cell migration	3/221	182/17913	0.390159	0.628876	0.576559	SH3BP1/HMOX1/GREM1	3
BP	GO:0032409	regulation of transporter activity	4/221	257/17913	0.391443	0.628876	0.576559	CACNG4/ACTN2/CAB39/PTAFR	4
BP	GO:0001912	positive regulation of leukocyte mediated cytotoxicity	1/221	40/17913	0.391714	0.628876	0.576559	NCR3	1
BP	GO:0006509	membrane protein ectodomain proteolysis	1/221	40/17913	0.391714	0.628876	0.576559	PRTN3	1
BP	GO:0019835	cytolysis	1/221	40/17913	0.391714	0.628876	0.576559	PAX2	1
BP	GO:0019985	translesion synthesis	1/221	40/17913	0.391714	0.628876	0.576559	ISG15	1
BP	GO:0031952	regulation of protein autophosphorylation	1/221	40/17913	0.391714	0.628876	0.576559	GREM1	1
BP	GO:0033574	response to testosterone	1/221	40/17913	0.391714	0.628876	0.576559	HOXD13	1
BP	GO:0038084	vascular endothelial growth factor signaling pathway	1/221	40/17913	0.391714	0.628876	0.576559	DLL1	1
BP	GO:0042987	amyloid precursor protein catabolic process	1/221	40/17913	0.391714	0.628876	0.576559	CLN3	1
BP	GO:0051281	positive regulation of release of sequestered calcium ion into cytosol	1/221	40/17913	0.391714	0.628876	0.576559	CXCL11	1
BP	GO:0072348	sulfur compound transport	1/221	40/17913	0.391714	0.628876	0.576559	SLC26A9	1
BP	GO:0043254	regulation of protein complex assembly	6/221	409/17913	0.39222	0.629352	0.576995	SPTB/PAK3/TUBB4A/CCR7/HNF1A/CDC42EP5	6
BP	GO:0048639	positive regulation of developmental growth	3/221	183/17913	0.393488	0.63105	0.578551	FGF8/TBX2/DLL1	3
BP	GO:0006096	glycolytic process	2/221	110/17913	0.394419	0.631539	0.579	PGAM2/NUPR1	2
BP	GO:0042035	regulation of cytokine biosynthetic process	2/221	110/17913	0.394419	0.631539	0.579	HMOX1/PTAFR	2
BP	GO:0043087	regulation of GTPase activity	6/221	410/17913	0.394423	0.631539	0.579	RGS17/SH3BP1/CCR7/EPHA5/PRTN3/ARHGAP8	6
BP	GO:0030198	extracellular matrix organization	5/221	334/17913	0.395068	0.631843	0.579279	ITGB7/GREM1/KLK7/BGN/DPP4	5
BP	GO:0007179	transforming growth factor beta receptor signaling pathway	3/221	184/17913	0.396813	0.631843	0.579279	LRRC32/PRDM16/NODAL	3
BP	GO:0050731	positive regulation of peptidyl-tyrosine phosphorylation	3/221	184/17913	0.396813	0.631843	0.579279	CD74/FGF8/GREM1	3
BP	GO:0072524	pyridine-containing compound metabolic process	3/221	184/17913	0.396813	0.631843	0.579279	KMO/PGAM2/NUPR1	3
BP	GO:0006757	ATP generation from ADP	2/221	111/17913	0.398762	0.631843	0.579279	PGAM2/NUPR1	2
BP	GO:0046620	regulation of organ growth	2/221	111/17913	0.398762	0.631843	0.579279	FGF8/TBX2	2
BP	GO:0000381	regulation of alternative mRNA splicing, via spliceosome	1/221	41/17913	0.399236	0.631843	0.579279	CELF6	1
BP	GO:0002639	positive regulation of immunoglobulin production	1/221	41/17913	0.399236	0.631843	0.579279	C17orf99	1
BP	GO:0006692	prostanoid metabolic process	1/221	41/17913	0.399236	0.631843	0.579279	CD74	1
BP	GO:0006693	prostaglandin metabolic process	1/221	41/17913	0.399236	0.631843	0.579279	CD74	1
BP	GO:0006911	phagocytosis, engulfment	1/221	41/17913	0.399236	0.631843	0.579279	SH3BP1	1
BP	GO:0007080	mitotic metaphase plate congression	1/221	41/17913	0.399236	0.631843	0.579279	PINX1	1
BP	GO:0010664	negative regulation of striated muscle cell apoptotic process	1/221	41/17913	0.399236	0.631843	0.579279	NUPR1	1
BP	GO:0010677	negative regulation of cellular carbohydrate metabolic process	1/221	41/17913	0.399236	0.631843	0.579279	NUPR1	1
BP	GO:0014003	oligodendrocyte development	1/221	41/17913	0.399236	0.631843	0.579279	ID2	1
BP	GO:0050798	activated T cell proliferation	1/221	41/17913	0.399236	0.631843	0.579279	LRRC32	1
BP	GO:0060612	adipose tissue development	1/221	41/17913	0.399236	0.631843	0.579279	ID2	1
BP	GO:1903053	regulation of extracellular matrix organization	1/221	41/17913	0.399236	0.631843	0.579279	DPP4	1
BP	GO:1903580	positive regulation of ATP metabolic process	1/221	41/17913	0.399236	0.631843	0.579279	NUPR1	1
BP	GO:1904706	negative regulation of vascular smooth muscle cell proliferation	1/221	41/17913	0.399236	0.631843	0.579279	HMOX1	1
BP	GO:1905209	positive regulation of cardiocyte differentiation	1/221	41/17913	0.399236	0.631843	0.579279	GREM1	1
BP	GO:2000404	regulation of T cell migration	1/221	41/17913	0.399236	0.631843	0.579279	RIPOR2	1
BP	GO:0007599	hemostasis	5/221	336/17913	0.399955	0.632264	0.579665	PRKCB/CYP4F11/PRTN3/HIST1H3F/HIST1H3C	5
BP	GO:0032259	methylation	5/221	336/17913	0.399955	0.632264	0.579665	MYB/TET1/PRDM16/HIST1H1B/METTL7A	5
BP	GO:1902905	positive regulation of supramolecular fiber organization	3/221	185/17913	0.400132	0.632264	0.579665	ACTN2/CCR7/CDC42EP5	3
BP	GO:0050817	coagulation	5/221	337/17913	0.402398	0.635268	0.582419	PRKCB/CYP4F11/PRTN3/HIST1H3F/HIST1H3C	5
BP	GO:0007613	memory	2/221	112/17913	0.40309	0.635268	0.582419	SLC8A2/SLC24A2	2
BP	GO:0051209	release of sequestered calcium ion into cytosol	2/221	112/17913	0.40309	0.635268	0.582419	CCR7/CXCL11	2
BP	GO:0051283	negative regulation of sequestering of calcium ion	2/221	112/17913	0.40309	0.635268	0.582419	CCR7/CXCL11	2
BP	GO:0070268	cornification	2/221	112/17913	0.40309	0.635268	0.582419	KRT13/CDSN	2
BP	GO:0021700	developmental maturation	4/221	262/17913	0.405364	0.635735	0.582847	PAX2/ID2/GREM1/CATSPERZ	4
BP	GO:0030100	regulation of endocytosis	4/221	262/17913	0.405364	0.635735	0.582847	GREM1/SLC2A4/PRTN3/DLL1	4
BP	GO:0002715	regulation of natural killer cell mediated immunity	1/221	42/17913	0.406665	0.635735	0.582847	NCR3	1
BP	GO:0009311	oligosaccharide metabolic process	1/221	42/17913	0.406665	0.635735	0.582847	ST8SIA3	1
BP	GO:0021983	pituitary gland development	1/221	42/17913	0.406665	0.635735	0.582847	FGF8	1
BP	GO:0032456	endocytic recycling	1/221	42/17913	0.406665	0.635735	0.582847	ACTN2	1
BP	GO:0046189	phenol-containing compound biosynthetic process	1/221	42/17913	0.406665	0.635735	0.582847	DDC	1
BP	GO:0050654	chondroitin sulfate proteoglycan metabolic process	1/221	42/17913	0.406665	0.635735	0.582847	BGN	1
BP	GO:0051181	cofactor transport	1/221	42/17913	0.406665	0.635735	0.582847	TCN1	1
BP	GO:0060999	positive regulation of dendritic spine development	1/221	42/17913	0.406665	0.635735	0.582847	PAK3	1
BP	GO:0061001	regulation of dendritic spine morphogenesis	1/221	42/17913	0.406665	0.635735	0.582847	PAK3	1
BP	GO:0090382	phagosome maturation	1/221	42/17913	0.406665	0.635735	0.582847	ATP6V0E2	1
BP	GO:0043547	positive regulation of GTPase activity	5/221	339/17913	0.407279	0.635735	0.582847	RGS17/SH3BP1/CCR7/PRTN3/ARHGAP8	5
BP	GO:0002223	stimulatory C-type lectin receptor signaling pathway	2/221	113/17913	0.407403	0.635735	0.582847	PAK3/MUC17	2
BP	GO:0006639	acylglycerol metabolic process	2/221	113/17913	0.407403	0.635735	0.582847	APOB/NKX2-3	2
BP	GO:0010508	positive regulation of autophagy	2/221	113/17913	0.407403	0.635735	0.582847	HMOX1/RNF152	2
BP	GO:0098754	detoxification	2/221	113/17913	0.407403	0.635735	0.582847	HBA2/HBA1	2
BP	GO:1903825	organic acid transmembrane transport	2/221	113/17913	0.407403	0.635735	0.582847	SLC1A3/SLC16A7	2
BP	GO:1905039	carboxylic acid transmembrane transport	2/221	113/17913	0.407403	0.635735	0.582847	SLC1A3/SLC16A7	2
BP	GO:0072331	signal transduction by p53 class mediator	4/221	264/17913	0.410917	0.639725	0.586505	CD74/HIPK1/NUPR1/MDM4	4
BP	GO:0006638	neutral lipid metabolic process	2/221	114/17913	0.411702	0.639725	0.586505	APOB/NKX2-3	2
BP	GO:0051282	regulation of sequestering of calcium ion	2/221	114/17913	0.411702	0.639725	0.586505	CCR7/CXCL11	2
BP	GO:1901222	regulation of NIK/NF-kappaB signaling	2/221	114/17913	0.411702	0.639725	0.586505	AGO1/GREM1	2
BP	GO:0044242	cellular lipid catabolic process	3/221	189/17913	0.41336	0.639725	0.586505	APOB/MMAA/ENPP7	3
BP	GO:0060348	bone development	3/221	189/17913	0.41336	0.639725	0.586505	FGF8/PDGFC/GREM1	3
BP	GO:0010470	regulation of gastrulation	1/221	43/17913	0.414002	0.639725	0.586505	NODAL	1
BP	GO:0010761	fibroblast migration	1/221	43/17913	0.414002	0.639725	0.586505	PAK3	1
BP	GO:0010828	positive regulation of glucose transmembrane transport	1/221	43/17913	0.414002	0.639725	0.586505	FGF19	1
BP	GO:0010883	regulation of lipid storage	1/221	43/17913	0.414002	0.639725	0.586505	APOB	1
BP	GO:0021762	substantia nigra development	1/221	43/17913	0.414002	0.639725	0.586505	PADI2	1
BP	GO:0034198	cellular response to amino acid starvation	1/221	43/17913	0.414002	0.639725	0.586505	RNF152	1
BP	GO:0035094	response to nicotine	1/221	43/17913	0.414002	0.639725	0.586505	HMOX1	1
BP	GO:0043303	mast cell degranulation	1/221	43/17913	0.414002	0.639725	0.586505	HMOX1	1
BP	GO:0060443	mammary gland morphogenesis	1/221	43/17913	0.414002	0.639725	0.586505	TBX2	1
BP	GO:0071364	cellular response to epidermal growth factor stimulus	1/221	43/17913	0.414002	0.639725	0.586505	PAX2	1
BP	GO:0099518	vesicle cytoskeletal trafficking	1/221	43/17913	0.414002	0.639725	0.586505	CLN3	1
BP	GO:1904407	positive regulation of nitric oxide metabolic process	1/221	43/17913	0.414002	0.639725	0.586505	TMEM106A	1
BP	GO:2001239	regulation of extrinsic apoptotic signaling pathway in absence of ligand	1/221	43/17913	0.414002	0.639725	0.586505	IFI6	1
BP	GO:0001701	in utero embryonic development	5/221	342/17913	0.414591	0.640306	0.587038	APOB/MFNG/ACVR1B/TET1/NODAL	5
BP	GO:0043620	regulation of DNA-templated transcription in response to stress	2/221	115/17913	0.415985	0.641799	0.588407	HMOX1/EGLN3	2
BP	GO:0070252	actin-mediated cell contraction	2/221	115/17913	0.415985	0.641799	0.588407	ACTN2/TNNT2	2
BP	GO:0016570	histone modification	6/221	420/17913	0.416433	0.642161	0.588739	PADI2/MYB/TET1/PRDM16/PRKCB/HIST1H1B	6
BP	GO:0009749	response to glucose	3/221	190/17913	0.416653	0.642171	0.588747	GIPR/PAX2/EPHA5	3
BP	GO:0006936	muscle contraction	5/221	343/17913	0.417026	0.642416	0.588972	ACTN2/TNNT2/PGAM2/PTAFR/TACR3	5
BP	GO:0006643	membrane lipid metabolic process	3/221	191/17913	0.41994	0.642667	0.589202	ST8SIA3/ENPP7/CLN3	3
BP	GO:0002220	innate immune response activating cell surface receptor signaling pathway	2/221	116/17913	0.420252	0.642667	0.589202	PAK3/MUC17	2
BP	GO:0007569	cell aging	2/221	116/17913	0.420252	0.642667	0.589202	ID2/TBX2	2
BP	GO:0032273	positive regulation of protein polymerization	2/221	116/17913	0.420252	0.642667	0.589202	CCR7/CDC42EP5	2
BP	GO:0002437	inflammatory response to antigenic stimulus	1/221	44/17913	0.421249	0.642667	0.589202	CCR7	1
BP	GO:0002548	monocyte chemotaxis	1/221	44/17913	0.421249	0.642667	0.589202	GREM1	1
BP	GO:0007140	male meiotic nuclear division	1/221	44/17913	0.421249	0.642667	0.589202	CATSPERZ	1
BP	GO:0010043	response to zinc ion	1/221	44/17913	0.421249	0.642667	0.589202	MT1F	1
BP	GO:0019731	antibacterial humoral response	1/221	44/17913	0.421249	0.642667	0.589202	KLK7	1
BP	GO:0032527	protein exit from endoplasmic reticulum	1/221	44/17913	0.421249	0.642667	0.589202	SLC35D3	1
BP	GO:0032965	regulation of collagen biosynthetic process	1/221	44/17913	0.421249	0.642667	0.589202	MYB	1
BP	GO:0035196	production of miRNAs involved in gene silencing by miRNA	1/221	44/17913	0.421249	0.642667	0.589202	AGO1	1
BP	GO:0043268	positive regulation of potassium ion transport	1/221	44/17913	0.421249	0.642667	0.589202	ACTN2	1
BP	GO:0046164	alcohol catabolic process	1/221	44/17913	0.421249	0.642667	0.589202	CYP39A1	1
BP	GO:0048701	embryonic cranial skeleton morphogenesis	1/221	44/17913	0.421249	0.642667	0.589202	NODAL	1
BP	GO:0050706	regulation of interleukin-1 beta secretion	1/221	44/17913	0.421249	0.642667	0.589202	CCR7	1
BP	GO:0061014	positive regulation of mRNA catabolic process	1/221	44/17913	0.421249	0.642667	0.589202	YTHDF3	1
BP	GO:0071827	plasma lipoprotein particle organization	1/221	44/17913	0.421249	0.642667	0.589202	APOB	1
BP	GO:1903214	regulation of protein targeting to mitochondrion	1/221	44/17913	0.421249	0.642667	0.589202	LEPROT	1
BP	GO:0006733	oxidoreduction coenzyme metabolic process	3/221	192/17913	0.423221	0.644689	0.591056	KMO/PGAM2/NUPR1	3
BP	GO:0018108	peptidyl-tyrosine phosphorylation	5/221	346/17913	0.42432	0.644689	0.591056	CD74/FGF8/EPHA5/PDGFC/GREM1	5
BP	GO:0001704	formation of primary germ layer	2/221	117/17913	0.424504	0.644689	0.591056	PAX2/NODAL	2
BP	GO:0001952	regulation of cell-matrix adhesion	2/221	117/17913	0.424504	0.644689	0.591056	CCR7/GREM1	2
BP	GO:0002761	regulation of myeloid leukocyte differentiation	2/221	117/17913	0.424504	0.644689	0.591056	CD74/ID2	2
BP	GO:0034754	cellular hormone metabolic process	2/221	117/17913	0.424504	0.644689	0.591056	HSD17B3/BCO1	2
BP	GO:0045727	positive regulation of translation	2/221	117/17913	0.424504	0.644689	0.591056	PTAFR/YTHDF3	2
BP	GO:0048706	embryonic skeletal system development	2/221	117/17913	0.424504	0.644689	0.591056	NODAL/HOXC5	2
BP	GO:0051208	sequestering of calcium ion	2/221	117/17913	0.424504	0.644689	0.591056	CCR7/CXCL11	2
BP	GO:0070661	leukocyte proliferation	4/221	270/17913	0.427509	0.645401	0.591709	CD74/CD70/LRRC32/GREM1	4
BP	GO:0002279	mast cell activation involved in immune response	1/221	45/17913	0.428407	0.645401	0.591709	HMOX1	1
BP	GO:0002448	mast cell mediated immunity	1/221	45/17913	0.428407	0.645401	0.591709	HMOX1	1
BP	GO:0002833	positive regulation of response to biotic stimulus	1/221	45/17913	0.428407	0.645401	0.591709	KLK7	1
BP	GO:0006998	nuclear envelope organization	1/221	45/17913	0.428407	0.645401	0.591709	PRKCB	1
BP	GO:0014014	negative regulation of gliogenesis	1/221	45/17913	0.428407	0.645401	0.591709	ID2	1
BP	GO:0018208	peptidyl-proline modification	1/221	45/17913	0.428407	0.645401	0.591709	EGLN3	1
BP	GO:0030199	collagen fibril organization	1/221	45/17913	0.428407	0.645401	0.591709	GREM1	1
BP	GO:0033628	regulation of cell adhesion mediated by integrin	1/221	45/17913	0.428407	0.645401	0.591709	DPP4	1
BP	GO:0035987	endodermal cell differentiation	1/221	45/17913	0.428407	0.645401	0.591709	NODAL	1
BP	GO:0045581	negative regulation of T cell differentiation	1/221	45/17913	0.428407	0.645401	0.591709	CD74	1
BP	GO:0046580	negative regulation of Ras protein signal transduction	1/221	45/17913	0.428407	0.645401	0.591709	RIPOR2	1
BP	GO:0046850	regulation of bone remodeling	1/221	45/17913	0.428407	0.645401	0.591709	GREM1	1
BP	GO:0060412	ventricular septum morphogenesis	1/221	45/17913	0.428407	0.645401	0.591709	ID2	1
BP	GO:0072604	interleukin-6 secretion	1/221	45/17913	0.428407	0.645401	0.591709	TMEM106A	1
BP	GO:0099172	presynapse organization	1/221	45/17913	0.428407	0.645401	0.591709	C5AR1	1
[truncated: 1,011 more rows]

## Sheet: CC
ONTOLOGY	ID	Description	GeneRatio	BgRatio	pvalue	p.adjust	qvalue	geneID	Count
CC	GO:0000788	nuclear nucleosome	4/233	38/18678	0.00124878	0.158833	0.153993	HIST1H3F/HIST1H3C/HIST1H4A/HIST1H4B	4
CC	GO:0071682	endocytic vesicle lumen	3/233	20/18678	0.00186745	0.158833	0.153993	APOB/HBA2/HBA1	3
CC	GO:0000786	nucleosome	6/233	106/18678	0.00213611	0.158833	0.153993	HIST1H1B/HIST1H3F/HIST1H3C/HIST1H2AB/HIST1H4A/HIST1H4B	6
CC	GO:0032993	protein-DNA complex	8/233	187/18678	0.00245444	0.158833	0.153993	PAX2/NUPR1/HIST1H1B/HIST1H3F/HIST1H3C/HIST1H2AB/HIST1H4A/HIST1H4B	8
CC	GO:0044815	DNA packaging complex	6/233	113/18678	0.00294448	0.158833	0.153993	HIST1H1B/HIST1H3F/HIST1H3C/HIST1H2AB/HIST1H4A/HIST1H4B	6
CC	GO:0060205	cytoplasmic vesicle lumen	11/233	338/18678	0.00357698	0.158833	0.153993	ACTN2/APOB/SCG3/PADI2/TCN1/CAB39/PRSS57/HBA2/PRTN3/HRNR/HBA1	11
CC	GO:0031983	vesicle lumen	11/233	339/18678	0.00365734	0.158833	0.153993	ACTN2/APOB/SCG3/PADI2/TCN1/CAB39/PRSS57/HBA2/PRTN3/HRNR/HBA1	11
CC	GO:0005775	vacuolar lumen	7/233	171/18678	0.00573035	0.217753	0.211118	CD74/APOB/PADI2/BGN/PRSS57/PRTN3/HRNR	7
CC	GO:0016323	basolateral plasma membrane	7/233	201/18678	0.0132719	0.408695	0.396242	CEACAM5/SLC8A2/SLC14A1/KCNJ16/TSHR/CDH16/C5AR1	7
CC	GO:0031228	intrinsic component of Golgi membrane	3/233	40/18678	0.0134828	0.408695	0.396242	MFNG/FKTN/CHST5	3
CC	GO:0045121	membrane raft	9/233	309/18678	0.0158302	0.408695	0.396242	ADCYAP1R1/HMOX1/SLC6A2/MALL/SLC2A4/PRTN3/DPP4/DLL1/CLN3	9
CC	GO:0098857	membrane microdomain	9/233	310/18678	0.0161327	0.408695	0.396242	ADCYAP1R1/HMOX1/SLC6A2/MALL/SLC2A4/PRTN3/DPP4/DLL1/CLN3	9
CC	GO:0098589	membrane region	9/233	321/18678	0.0197464	0.461762	0.447692	ADCYAP1R1/HMOX1/SLC6A2/MALL/SLC2A4/PRTN3/DPP4/DLL1/CLN3	9
CC	GO:0036379	myofilament	2/233	19/18678	0.0230444	0.500394	0.485146	TNNT2/TRIM32	2
CC	GO:0035578	azurophil granule lumen	4/233	91/18678	0.0271534	0.518562	0.502761	PADI2/PRSS57/PRTN3/HRNR	4
CC	GO:0033176	proton-transporting V-type ATPase complex	2/233	21/18678	0.0278436	0.518562	0.502761	ATP6V0E2/ATP6AP1L	2
CC	GO:0030139	endocytic vesicle	8/233	289/18678	0.0289985	0.518562	0.502761	CD74/CACNG4/APOB/NCF2/ATP6V0E2/HBA2/DPP4/HBA1	8
CC	GO:0030864	cortical actin cytoskeleton	3/233	57/18678	0.034251	0.578462	0.560836	SPTB/ACTN2/PLEKHH2	3
CC	GO:0072562	blood microparticle	5/233	147/18678	0.03724	0.592047	0.574007	CP/CFHR3/HBA2/ZNF177/HBA1	5
CC	GO:0009897	external side of plasma membrane	6/233	199/18678	0.0389504	0.592047	0.574007	CD74/CEACAM5/FGF8/EPHA5/MUC17/SLC2A4	6
CC	GO:0044853	plasma membrane raft	4/233	106/18678	0.0437851	0.617348	0.598537	ADCYAP1R1/HMOX1/PRTN3/CLN3	4
CC	GO:1902555	endoribonuclease complex	2/233	28/18678	0.0473579	0.617348	0.598537	AGO1/RPPH1	2
CC	GO:1905348	endonuclease complex	2/233	28/18678	0.0473579	0.617348	0.598537	AGO1/RPPH1	2
CC	GO:0034774	secretory granule lumen	8/233	321/18678	0.048738	0.617348	0.598537	ACTN2/SCG3/PADI2/TCN1/CAB39/PRSS57/PRTN3/HRNR	8
CC	GO:0030173	integral component of Golgi membrane	2/233	35/18678	0.0704689	0.687034	0.666099	MFNG/FKTN	2
CC	GO:0030133	transport vesicle	8/233	349/18678	0.0718841	0.687034	0.666099	CD74/SCG3/DDC/AZIN2/LGI3/SLC2A4/BGN/CLN3	8
CC	GO:0005901	caveola	3/233	79/18678	0.0760996	0.687034	0.666099	ADCYAP1R1/HMOX1/CLN3	3
CC	GO:0044448	cell cortex part	4/233	128/18678	0.0764862	0.687034	0.666099	SPTB/ACTN2/SH3BP1/PLEKHH2	4
CC	GO:0005891	voltage-gated calcium channel complex	2/233	37/18678	0.0776269	0.687034	0.666099	CACNG4/CATSPERZ	2
CC	GO:0030863	cortical cytoskeleton	3/233	81/18678	0.0806684	0.687034	0.666099	SPTB/ACTN2/PLEKHH2	3
CC	GO:0098552	side of membrane	8/233	359/18678	0.0815375	0.687034	0.666099	CD74/SPTB/CEACAM5/FGF8/PTPN7/EPHA5/MUC17/SLC2A4	8
CC	GO:0016324	apical plasma membrane	7/233	300/18678	0.0826556	0.687034	0.666099	CEACAM5/RIPOR2/UPK1B/MUC17/SLC26A9/DPP4/DLL1	7
CC	GO:0005801	cis-Golgi network	2/233	39/18678	0.0850018	0.687034	0.666099	FKTN/AZIN2	2
CC	GO:0022627	cytosolic small ribosomal subunit	2/233	39/18678	0.0850018	0.687034	0.666099	HBA2/HBA1	2
CC	GO:0045177	apical part of cell	8/233	365/18678	0.0876823	0.687034	0.666099	CEACAM5/RIPOR2/UPK1B/MUC17/SLC26A9/C5AR1/DPP4/DLL1	8
CC	GO:0030669	clathrin-coated endocytic vesicle membrane	2/233	40/18678	0.088766	0.687034	0.666099	CD74/APOB	2
CC	GO:0005771	multivesicular body	2/233	41/18678	0.0925788	0.687034	0.666099	CD74/SLC2A4	2
CC	GO:0099634	postsynaptic specialization membrane	3/233	86/18678	0.0925923	0.687034	0.666099	CACNG4/ACTN2/RAPSN	3
CC	GO:0032589	neuron projection membrane	2/233	43/18678	0.100343	0.687034	0.666099	RIPOR2/TACR3	2
CC	GO:0001533	cornified envelope	2/233	44/18678	0.104292	0.687034	0.666099	HRNR/CDSN	2
CC	GO:0016469	proton-transporting two-sector ATPase complex	2/233	44/18678	0.104292	0.687034	0.666099	ATP6V0E2/ATP6AP1L	2
CC	GO:0043202	lysosomal lumen	3/233	94/18678	0.113065	0.687034	0.666099	CD74/APOB/BGN	3
CC	GO:0043025	neuronal cell body	9/233	454/18678	0.116054	0.687034	0.666099	TRPM5/SLC1A3/APOB/TUBB4A/SLC8A2/DDC/AZIN2/EPHA5/TACR3	9
CC	GO:0000145	exocyst	1/233	10/18678	0.117998	0.687034	0.666099	SH3BP1	1
CC	GO:0016442	RISC complex	1/233	10/18678	0.117998	0.687034	0.666099	AGO1	1
CC	GO:0033179	proton-transporting V-type ATPase, V0 domain	1/233	10/18678	0.117998	0.687034	0.666099	ATP6V0E2	1
CC	GO:0036128	CatSper complex	1/233	10/18678	0.117998	0.687034	0.666099	CATSPERZ	1
CC	GO:0031332	RNAi effector complex	1/233	11/18678	0.129006	0.687034	0.666099	AGO1	1
CC	GO:0005766	primary lysosome	4/233	155/18678	0.129134	0.687034	0.666099	PADI2/PRSS57/PRTN3/HRNR	4
CC	GO:0042582	azurophil granule	4/233	155/18678	0.129134	0.687034	0.666099	PADI2/PRSS57/PRTN3/HRNR	4
CC	GO:0030315	T-tubule	2/233	51/18678	0.133008	0.687034	0.666099	CACNG4/SLC2A4	2
CC	GO:0000940	condensed chromosome outer kinetochore	1/233	12/18678	0.139878	0.687034	0.666099	SKA1	1
CC	GO:0042627	chylomicron	1/233	12/18678	0.139878	0.687034	0.666099	APOB	1
CC	GO:1990454	L-type voltage-gated calcium channel complex	1/233	12/18678	0.139878	0.687034	0.666099	CACNG4	1
CC	GO:0030666	endocytic vesicle membrane	4/233	161/18678	0.142472	0.687034	0.666099	CD74/CACNG4/APOB/ATP6V0E2	4
CC	GO:1904724	tertiary granule lumen	2/233	55/18678	0.150132	0.687034	0.666099	TCN1/METTL7A	2
CC	GO:0099523	presynaptic cytosol	1/233	13/18678	0.150615	0.687034	0.666099	PRKCB	1
CC	GO:0043235	receptor complex	6/233	292/18678	0.159075	0.687034	0.666099	CD74/CACNG4/ADCYAP1R1/ACVR1B/ITGB7/TSHR	6
CC	GO:0005767	secondary lysosome	1/233	14/18678	0.161218	0.687034	0.666099	NCF2	1
CC	GO:0030677	ribonuclease P complex	1/233	14/18678	0.161218	0.687034	0.666099	RPPH1	1
CC	GO:0033178	proton-transporting two-sector ATPase complex, catalytic domain	1/233	14/18678	0.161218	0.687034	0.666099	ATP6AP1L	1
CC	GO:0034362	low-density lipoprotein particle	1/233	14/18678	0.161218	0.687034	0.666099	APOB	1
CC	GO:0034704	calcium channel complex	2/233	59/18678	0.167663	0.687034	0.666099	CACNG4/CATSPERZ	2
CC	GO:0045334	clathrin-coated endocytic vesicle	2/233	59/18678	0.167663	0.687034	0.666099	CD74/APOB	2
CC	GO:0098839	postsynaptic density membrane	2/233	59/18678	0.167663	0.687034	0.666099	CACNG4/ACTN2	2
CC	GO:0033268	node of Ranvier	1/233	15/18678	0.171689	0.687034	0.666099	KCNQ3	1
CC	GO:0043194	axon initial segment	1/233	15/18678	0.171689	0.687034	0.666099	KCNQ3	1
CC	GO:0030017	sarcomere	4/233	174/18678	0.173103	0.687034	0.666099	ACTN2/TNNT2/TRIM32/FBXO32	4
CC	GO:0005865	striated muscle thin filament	1/233	16/18678	0.18203	0.687034	0.666099	TNNT2	1
CC	GO:0033177	proton-transporting two-sector ATPase complex, proton-transporting domain	1/233	16/18678	0.18203	0.687034	0.666099	ATP6V0E2	1
CC	GO:0042613	MHC class II protein complex	1/233	16/18678	0.18203	0.687034	0.666099	CD74	1
CC	GO:0070971	endoplasmic reticulum exit site	1/233	16/18678	0.18203	0.687034	0.666099	APOB	1
CC	GO:0071437	invadopodium	1/233	16/18678	0.18203	0.687034	0.666099	DPP4	1
CC	GO:0031143	pseudopodium	1/233	17/18678	0.192243	0.687034	0.666099	ACTN2	1
CC	GO:0042599	lamellar body	1/233	17/18678	0.192243	0.687034	0.666099	KLK7	1
CC	GO:0000784	nuclear chromosome, telomeric region	3/233	121/18678	0.192325	0.687034	0.666099	PINX1/HIST1H4A/HIST1H4B	3
CC	GO:0030136	clathrin-coated vesicle	4/233	182/18678	0.192991	0.687034	0.666099	CD74/APOB/MALL/SLC2A4	4
CC	GO:0034703	cation channel complex	4/233	182/18678	0.192991	0.687034	0.666099	CACNG4/KCNJ16/KCNQ3/CATSPERZ	4
CC	GO:0044304	main axon	2/233	65/18678	0.194549	0.687034	0.666099	TUBB4A/KCNQ3	2
CC	GO:1902554	serine/threonine protein kinase complex	2/233	65/18678	0.194549	0.687034	0.666099	ACVR1B/CAB39	2
CC	GO:0070160	tight junction	3/233	123/18678	0.198677	0.687034	0.666099	ADCYAP1R1/SH3BP1/ILDR1	3
CC	GO:0005859	muscle myosin complex	1/233	18/18678	0.202328	0.687034	0.666099	TRIM32	1
CC	GO:0099092	postsynaptic density, intracellular component	1/233	18/18678	0.202328	0.687034	0.666099	ACTN2	1
CC	GO:0098797	plasma membrane protein complex	8/233	451/18678	0.203045	0.687034	0.666099	CD74/CACNG4/NCF2/ACVR1B/ITGB7/KCNJ16/KCNQ3/CATSPERZ	8
CC	GO:0015935	small ribosomal subunit	2/233	67/18678	0.203632	0.687034	0.666099	HBA2/HBA1	2
CC	GO:0030176	integral component of endoplasmic reticulum membrane	3/233	125/18678	0.205079	0.687034	0.666099	CD74/BSCL2/CLN3	3
CC	GO:0042383	sarcolemma	3/233	125/18678	0.205079	0.687034	0.666099	CACNG4/SLC2A4/BGN	3
CC	GO:0031300	intrinsic component of organelle membrane	4/233	188/18678	0.208354	0.687034	0.666099	MFNG/FKTN/CHST5/RNF152	4
CC	GO:0031233	intrinsic component of external side of plasma membrane	1/233	19/18678	0.212288	0.687034	0.666099	CEACAM5	1
CC	GO:0044449	contractile fiber part	4/233	192/18678	0.218787	0.687034	0.666099	ACTN2/TNNT2/TRIM32/FBXO32	4
CC	GO:0034361	very-low-density lipoprotein particle	1/233	20/18678	0.222125	0.687034	0.666099	APOB	1
CC	GO:0034385	triglyceride-rich plasma lipoprotein particle	1/233	20/18678	0.222125	0.687034	0.666099	APOB	1
CC	GO:0031227	intrinsic component of endoplasmic reticulum membrane	3/233	131/18678	0.224554	0.687034	0.666099	CD74/BSCL2/CLN3	3
CC	GO:0005802	trans-Golgi network	4/233	196/18678	0.229357	0.687034	0.666099	CD74/CHAC1/AZIN2/CLN3	4
CC	GO:0031012	extracellular matrix	8/233	468/18678	0.23105	0.687034	0.666099	ANOS1/LAD1/TGM4/GREM1/MUC17/BGN/PRTN3/HRNR	8
CC	GO:0097228	sperm principal piece	1/233	21/18678	0.231839	0.687034	0.666099	CATSPERZ	1
CC	GO:0099091	postsynaptic specialization, intracellular component	1/233	21/18678	0.231839	0.687034	0.666099	ACTN2	1
CC	GO:0062023	collagen-containing extracellular matrix	7/233	399/18678	0.231927	0.687034	0.666099	LAD1/TGM4/GREM1/MUC17/BGN/PRTN3/HRNR	7
CC	GO:0030016	myofibril	4/233	197/18678	0.23202	0.687034	0.666099	ACTN2/TNNT2/TRIM32/FBXO32	4
CC	GO:0005791	rough endoplasmic reticulum	2/233	74/18678	0.235738	0.687034	0.666099	ADCYAP1R1/EPHA5	2
CC	GO:0016460	myosin II complex	1/233	22/18678	0.241432	0.687034	0.666099	TRIM32	1
CC	GO:0031258	lamellipodium membrane	1/233	22/18678	0.241432	0.687034	0.666099	DPP4	1
CC	GO:0032982	myosin filament	1/233	22/18678	0.241432	0.687034	0.666099	TRIM32	1
CC	GO:0035327	transcriptionally active chromatin	1/233	22/18678	0.241432	0.687034	0.666099	PADI2	1
CC	GO:0097225	sperm midpiece	1/233	22/18678	0.241432	0.687034	0.666099	TACR3	1
CC	GO:0008076	voltage-gated potassium channel complex	2/233	76/18678	0.244971	0.687034	0.666099	KCNJ16/KCNQ3	2
CC	GO:1902911	protein kinase complex	2/233	77/18678	0.249593	0.687034	0.666099	ACVR1B/CAB39	2
CC	GO:0032281	AMPA glutamate receptor complex	1/233	23/18678	0.250906	0.687034	0.666099	CACNG4	1
CC	GO:0032590	dendrite membrane	1/233	23/18678	0.250906	0.687034	0.666099	TACR3	1
CC	GO:0044305	calyx of Held	1/233	23/18678	0.250906	0.687034	0.666099	PRKCB	1
CC	GO:0005911	cell-cell junction	7/233	414/18678	0.259993	0.687034	0.666099	ADCYAP1R1/SH3BP1/ILDR1/PCDH1/FRS2/DPP4/CDSN	7
CC	GO:0032809	neuronal cell body membrane	1/233	24/18678	0.260262	0.687034	0.666099	TACR3	1
CC	GO:0099522	region of cytosol	1/233	24/18678	0.260262	0.687034	0.666099	PRKCB	1
CC	GO:0043197	dendritic spine	3/233	142/18678	0.261093	0.687034	0.666099	ACTN2/SLC8A2/ANKS1B	3
CC	GO:0034705	potassium channel complex	2/233	80/18678	0.263471	0.687034	0.666099	KCNJ16/KCNQ3	2
CC	GO:0043292	contractile fiber	4/233	209/18678	0.264517	0.687034	0.666099	ACTN2/TNNT2/TRIM32/FBXO32	4
CC	GO:0030057	desmosome	1/233	25/18678	0.269502	0.687034	0.666099	CDSN	1
CC	GO:0042611	MHC protein complex	1/233	25/18678	0.269502	0.687034	0.666099	CD74	1
CC	GO:0044298	cell body membrane	1/233	25/18678	0.269502	0.687034	0.666099	TACR3	1
CC	GO:0044309	neuron spine	3/233	145/18678	0.271198	0.687034	0.666099	ACTN2/SLC8A2/ANKS1B	3
CC	GO:0030140	trans-Golgi network transport vesicle	1/233	26/18678	0.278627	0.694283	0.673128	SLC2A4	1
CC	GO:0034364	high-density lipoprotein particle	1/233	26/18678	0.278627	0.694283	0.673128	APOB	1
CC	GO:0036126	sperm flagellum	2/233	84/18678	0.281978	0.696921	0.675685	TACR3/CATSPERZ	2
CC	GO:0001891	phagocytic cup	1/233	27/18678	0.287638	0.705178	0.68369	SH3BP1	1
CC	GO:0015629	actin cytoskeleton	7/233	432/18678	0.294868	0.707093	0.685548	SPTB/ACTN2/FYB1/TNNT2/TRIM32/PLEKHH2/LAD1	7
CC	GO:0031256	leading edge membrane	3/233	153/18678	0.298327	0.707093	0.685548	RIPOR2/TACR3/DPP4	3
CC	GO:0098802	plasma membrane receptor complex	3/233	153/18678	0.298327	0.707093	0.685548	CACNG4/ACVR1B/ITGB7	3
CC	GO:0097729	9+2 motile cilium	2/233	89/18678	0.305052	0.707093	0.685548	TACR3/CATSPERZ	2
CC	GO:0071556	integral component of lumenal side of endoplasmic reticulum membrane	1/233	29/18678	0.305326	0.707093	0.685548	CD74	1
CC	GO:0098553	lumenal side of endoplasmic reticulum membrane	1/233	29/18678	0.305326	0.707093	0.685548	CD74	1
CC	GO:0000781	chromosome, telomeric region	3/233	156/18678	0.308547	0.707093	0.685548	PINX1/HIST1H4A/HIST1H4B	3
CC	GO:0008021	synaptic vesicle	3/233	156/18678	0.308547	0.707093	0.685548	DDC/LGI3/CLN3	3
CC	GO:0005790	smooth endoplasmic reticulum	1/233	30/18678	0.314005	0.707093	0.685548	APOB	1
CC	GO:0008305	integrin complex	1/233	30/18678	0.314005	0.707093	0.685548	ITGB7	1
CC	GO:0034451	centriolar satellite	1/233	30/18678	0.314005	0.707093	0.685548	PAX2	1
CC	GO:0005938	cell cortex	4/233	229/18678	0.320271	0.7159	0.694086	SPTB/ACTN2/SH3BP1/PLEKHH2	4
CC	GO:0022626	cytosolic ribosome	2/233	95/18678	0.332553	0.723393	0.70135	HBA2/HBA1	2
CC	GO:0005788	endoplasmic reticulum lumen	5/233	306/18678	0.334956	0.723393	0.70135	CP/APOB/SCG3/PDGFC/ARSI	5
CC	GO:0070820	tertiary granule	3/233	164/18678	0.335839	0.723393	0.70135	TCN1/PTAFR/METTL7A	3
CC	GO:0005720	nuclear heterochromatin	1/233	33/18678	0.3394	0.723393	0.70135	HIST1H1B	1
CC	GO:0098636	protein complex involved in cell adhesion	1/233	33/18678	0.3394	0.723393	0.70135	ITGB7	1
CC	GO:0000790	nuclear chromatin	5/233	309/18678	0.342346	0.723393	0.70135	HIST1H1B/HIST1H3F/HIST1H3C/HIST1H4A/HIST1H4B	5
CC	GO:0031301	integral component of organelle membrane	3/233	166/18678	0.34266	0.723393	0.70135	MFNG/FKTN/RNF152	3
CC	GO:0070382	exocytic vesicle	3/233	166/18678	0.34266	0.723393	0.70135	DDC/LGI3/CLN3	3
CC	GO:0031904	endosome lumen	1/233	34/18678	0.347656	0.725944	0.703824	APOB	1
CC	GO:0030175	filopodium	2/233	99/18678	0.350719	0.725944	0.703824	ACTN2/RIPOR2	2
CC	GO:0005770	late endosome	4/233	240/18678	0.351359	0.725944	0.703824	CD74/SLA2/SLC2A4/CLN3	4
CC	GO:0000777	condensed chromosome kinetochore	2/233	100/18678	0.355235	0.725944	0.703824	SKA1/PINX1	2
CC	GO:0019005	SCF ubiquitin ligase complex	1/233	35/18678	0.355808	0.725944	0.703824	FBXO32	1
CC	GO:0099572	postsynaptic specialization	5/233	316/18678	0.359629	0.728848	0.706639	CACNG4/PAK3/ACTN2/RAPSN/ANKS1B	5
CC	GO:0005796	Golgi lumen	2/233	102/18678	0.364233	0.73329	0.710946	MUC17/BGN	2
CC	GO:0008328	ionotropic glutamate receptor complex	1/233	37/18678	0.37181	0.733963	0.711599	CACNG4	1
CC	GO:0034358	plasma lipoprotein particle	1/233	37/18678	0.37181	0.733963	0.711599	APOB	1
CC	GO:1990777	lipoprotein particle	1/233	37/18678	0.37181	0.733963	0.711599	APOB	1
CC	GO:0034702	ion channel complex	4/233	249/18678	0.376825	0.736091	0.713662	CACNG4/KCNJ16/KCNQ3/CATSPERZ	4
CC	GO:0016363	nuclear matrix	2/233	106/18678	0.382082	0.736091	0.713662	PHACTR3/MYB	2
CC	GO:0030018	Z disc	2/233	106/18678	0.382082	0.736091	0.713662	ACTN2/FBXO32	2
CC	GO:0097223	sperm part	3/233	179/18678	0.38678	0.736091	0.713662	NCF2/TACR3/CATSPERZ	3
CC	GO:0032994	protein-lipid complex	1/233	39/18678	0.387416	0.736091	0.713662	APOB	1
CC	GO:0098878	neurotransmitter receptor complex	1/233	39/18678	0.387416	0.736091	0.713662	CACNG4	1
CC	GO:0000779	condensed chromosome, centromeric region	2/233	110/18678	0.399717	0.750086	0.72723	SKA1/PINX1	2
CC	GO:0030665	clathrin-coated vesicle membrane	2/233	110/18678	0.399717	0.750086	0.72723	CD74/APOB	2
CC	GO:0016235	aggresome	1/233	42/18678	0.410105	0.761163	0.73797	PRDM16	1
CC	GO:0030135	coated vesicle	4/233	261/18678	0.410627	0.761163	0.73797	CD74/APOB/MALL/SLC2A4	4
CC	GO:0009898	cytoplasmic side of plasma membrane	2/233	114/18678	0.417114	0.764542	0.741246	SPTB/PTPN7	2
CC	GO:0005637	nuclear inner membrane	1/233	43/18678	0.41748	0.764542	0.741246	IFI27	1
CC	GO:0031674	I band	2/233	116/18678	0.425717	0.76666	0.743299	ACTN2/FBXO32	2
CC	GO:0030027	lamellipodium	3/233	191/18678	0.426879	0.76666	0.743299	SH3BP1/PLEKHH2/DPP4	3
CC	GO:0005765	lysosomal membrane	5/233	344/18678	0.428724	0.76666	0.743299	CD74/CP/RNF152/DPP4/CLN3	5
CC	GO:0098852	lytic vacuole membrane	5/233	344/18678	0.428724	0.76666	0.743299	CD74/CP/RNF152/DPP4/CLN3	5
CC	GO:0000785	chromatin	7/233	500/18678	0.432474	0.767093	0.743719	PADI2/HIST1H1B/HIST1H3F/HIST1H3C/HIST1H2AB/HIST1H4A/HIST1H4B	7
CC	GO:0005923	bicellular tight junction	2/233	118/18678	0.434255	0.767093	0.743719	ADCYAP1R1/SH3BP1	2
CC	GO:1902495	transmembrane transporter complex	4/233	271/18678	0.438513	0.767093	0.743719	CACNG4/KCNJ16/KCNQ3/CATSPERZ	4
CC	GO:0043209	myelin sheath	1/233	46/18678	0.43906	0.767093	0.743719	TUBB4A	1
CC	GO:1990351	transporter complex	4/233	276/18678	0.452319	0.781925	0.758099	CACNG4/KCNJ16/KCNQ3/CATSPERZ	4
CC	GO:0099061	integral component of postsynaptic density membrane	1/233	48/18678	0.453002	0.781925	0.758099	CACNG4	1
CC	GO:0098858	actin-based cell projection	3/233	200/18678	0.45635	0.781925	0.758099	ACTN2/RIPOR2/ENPP7	3
CC	GO:0005874	microtubule	5/233	357/18678	0.460391	0.781925	0.758099	TUBB4A/SKA1/RADIL/EML5/TTLL6	5
CC	GO:0034399	nuclear periphery	2/233	126/18678	0.467704	0.781925	0.758099	PHACTR3/MYB	2
CC	GO:0043204	perikaryon	2/233	127/18678	0.471803	0.781925	0.758099	SLC8A2/AZIN2	2
CC	GO:0005782	peroxisomal matrix	1/233	51/18678	0.473271	0.781925	0.758099	AGXT	1
CC	GO:0031907	microbody lumen	1/233	51/18678	0.473271	0.781925	0.758099	AGXT	1
CC	GO:0032420	stereocilium	1/233	51/18678	0.473271	0.781925	0.758099	RIPOR2	1
CC	GO:0099146	intrinsic component of postsynaptic density membrane	1/233	51/18678	0.473271	0.781925	0.758099	CACNG4	1
CC	GO:0045335	phagocytic vesicle	2/233	128/18678	0.475882	0.781991	0.758163	NCF2/ATP6V0E2	2
CC	GO:0044445	cytosolic part	3/233	207/18678	0.478828	0.782601	0.758754	PRKCB/HBA2/HBA1	3
CC	GO:0005876	spindle microtubule	1/233	53/18678	0.486366	0.785113	0.76119	SKA1	1
CC	GO:0000776	kinetochore	2/233	131/18678	0.488007	0.785113	0.76119	SKA1/PINX1	2
CC	GO:0014069	postsynaptic density	4/233	290/18678	0.490354	0.785113	0.76119	CACNG4/PAK3/ACTN2/ANKS1B	4
CC	GO:0032421	stereocilium bundle	1/233	54/18678	0.492792	0.785113	0.76119	RIPOR2	1
CC	GO:0012507	ER to Golgi transport vesicle membrane	1/233	55/18678	0.499137	0.785113	0.76119	CD74	1
CC	GO:0099023	tethering complex	1/233	55/18678	0.499137	0.785113	0.76119	SH3BP1	1
CC	GO:0043296	apical junction complex	2/233	134/18678	0.499956	0.785113	0.76119	ADCYAP1R1/SH3BP1	2
CC	GO:0032279	asymmetric synapse	4/233	294/18678	0.501026	0.785113	0.76119	CACNG4/PAK3/ACTN2/ANKS1B	4
CC	GO:0045211	postsynaptic membrane	4/233	299/18678	0.514229	0.799718	0.77535	CACNG4/ACTN2/RAPSN/ANKS1B	4
CC	GO:0098562	cytoplasmic side of membrane	2/233	138/18678	0.515608	0.799718	0.77535	SPTB/PTPN7	2
CC	GO:0005774	vacuolar membrane	5/233	382/18678	0.519718	0.802001	0.777563	CD74/CP/RNF152/DPP4/CLN3	5
CC	GO:0031252	cell leading edge	5/233	384/18678	0.52435	0.804718	0.780197	SH3BP1/RIPOR2/PLEKHH2/TACR3/DPP4	5
CC	GO:0005844	polysome	1/233	60/18678	0.529699	0.804718	0.780197	AGO1	1
CC	GO:0031594	neuromuscular junction	1/233	60/18678	0.529699	0.804718	0.780197	RAPSN	1
CC	GO:0044454	nuclear chromosome part	6/233	469/18678	0.532674	0.804718	0.780197	HIST1H1B/PINX1/HIST1H3F/HIST1H3C/HIST1H4A/HIST1H4B	6
CC	GO:0098862	cluster of actin-based cell projections	2/233	143/18678	0.534714	0.804718	0.780197	RIPOR2/LCTL	2
CC	GO:0035580	specific granule lumen	1/233	62/18678	0.541397	0.808	0.78338	TCN1	1
CC	GO:0005798	Golgi-associated vesicle	2/233	145/18678	0.542211	0.808	0.78338	CD74/SLC2A4	2
CC	GO:0000932	P-body	1/233	63/18678	0.547137	0.810877	0.786169	AGO1	1
CC	GO:0097060	synaptic membrane	5/233	395/18678	0.549476	0.810877	0.786169	CACNG4/ACTN2/RAPSN/ANKS1B/TMEM240	5
CC	GO:0098984	neuron to neuron synapse	4/233	315/18678	0.555355	0.815594	0.790743	CACNG4/PAK3/ACTN2/ANKS1B	4
CC	GO:0016459	myosin complex	1/233	65/18678	0.558403	0.816127	0.791259	TRIM32	1
CC	GO:0005905	clathrin-coated pit	1/233	66/18678	0.563931	0.816483	0.791604	SLC2A4	1
CC	GO:0099568	cytoplasmic region	5/233	402/18678	0.565132	0.816483	0.791604	SPTB/ACTN2/SH3BP1/TUBB4A/PLEKHH2	5
CC	GO:0016529	sarcoplasmic reticulum	1/233	67/18678	0.56939	0.816483	0.791604	SLC2A4	1
CC	GO:0031093	platelet alpha granule lumen	1/233	67/18678	0.56939	0.816483	0.791604	ACTN2	1
CC	GO:0030134	COPII-coated ER to Golgi transport vesicle	1/233	69/18678	0.580105	0.81876	0.793812	CD74	1
CC	GO:0031225	anchored component of membrane	2/233	156/18678	0.581936	0.81876	0.793812	CEACAM5/LY6D	2
CC	GO:0005811	lipid droplet	1/233	70/18678	0.585362	0.81876	0.793812	METTL7A	1
CC	GO:0033116	endoplasmic reticulum-Golgi intermediate compartment membrane	1/233	70/18678	0.585362	0.81876	0.793812	AZIN2	1
CC	GO:0099060	integral component of postsynaptic specialization membrane	1/233	71/18678	0.590554	0.81876	0.793812	CACNG4	1
CC	GO:0005758	mitochondrial intermembrane space	1/233	73/18678	0.600744	0.81876	0.793812	GATM	1
CC	GO:0070821	tertiary granule membrane	1/233	73/18678	0.600744	0.81876	0.793812	PTAFR	1
CC	GO:0031514	motile cilium	2/233	162/18678	0.602516	0.81876	0.793812	TACR3/CATSPERZ	2
CC	GO:0005884	actin filament	1/233	74/18678	0.605744	0.81876	0.793812	ACTN2	1
CC	GO:0030670	phagocytic vesicle membrane	1/233	74/18678	0.605744	0.81876	0.793812	ATP6V0E2	1
CC	GO:0098948	intrinsic component of postsynaptic specialization membrane	1/233	74/18678	0.605744	0.81876	0.793812	CACNG4	1
CC	GO:0098687	chromosomal region	4/233	337/18678	0.608742	0.81876	0.793812	SKA1/PINX1/HIST1H4A/HIST1H4B	4
CC	GO:0000792	heterochromatin	1/233	75/18678	0.610682	0.81876	0.793812	HIST1H1B	1
CC	GO:0015030	Cajal body	1/233	75/18678	0.610682	0.81876	0.793812	ANKS1B	1
CC	GO:0005840	ribosome	3/233	252/18678	0.611377	0.81876	0.793812	HBA2/HBA1/RNA5-8SN1	3
CC	GO:0016528	sarcoplasm	1/233	76/18678	0.615558	0.820744	0.795735	SLC2A4	1
CC	GO:0005741	mitochondrial outer membrane	2/233	168/18678	0.622326	0.823239	0.798154	KMO/IFI27	2
CC	GO:0017053	transcriptional repressor complex	1/233	78/18678	0.625129	0.823239	0.798154	PRDM16	1
CC	GO:0030662	coated vesicle membrane	2/233	169/18678	0.625553	0.823239	0.798154	CD74/APOB	2
CC	GO:0005913	cell-cell adherens junction	1/233	79/18678	0.629825	0.825288	0.80014	FRS2	1
CC	GO:0005902	microvillus	1/233	80/18678	0.634462	0.8255	0.800346	ENPP7	1
CC	GO:0044391	ribosomal subunit	2/233	173/18678	0.638248	0.8255	0.800346	HBA2/HBA1	2
CC	GO:0016234	inclusion body	1/233	81/18678	0.639042	0.8255	0.800346	PRDM16	1
CC	GO:0098793	presynapse	5/233	438/18678	0.640997	0.8255	0.800346	DDC/PRKCB/LGI3/SLC2A4/CLN3	5
CC	GO:0031970	organelle envelope lumen	1/233	82/18678	0.643564	0.8255	0.800346	GATM	1
CC	GO:0036464	cytoplasmic ribonucleoprotein granule	2/233	176/18678	0.647547	0.827118	0.801915	AGO1/TSTD1	2
CC	GO:0005776	autophagosome	1/233	85/18678	0.656796	0.828961	0.803702	CLN3	1
CC	GO:0032588	trans-Golgi network membrane	1/233	85/18678	0.656796	0.828961	0.803702	CD74	1
CC	GO:0005667	transcription factor complex	3/233	270/18678	0.65769	0.828961	0.803702	MXI1/TBX2/POU3F1	3
CC	GO:0005581	collagen trimer	1/233	86/18678	0.661097	0.828961	0.803702	C1QTNF6	1
CC	GO:0061695	transferase complex, transferring phosphorus-containing groups	2/233	181/18678	0.662624	0.828961	0.803702	ACVR1B/CAB39	2
CC	GO:0000775	chromosome, centromeric region	2/233	185/18678	0.67431	0.837053	0.811547	SKA1/PINX1	2
CC	GO:0005604	basement membrane	1/233	91/18678	0.681809	0.837053	0.811547	LAD1	1
CC	GO:0031091	platelet alpha granule	1/233	91/18678	0.681809	0.837053	0.811547	ACTN2	1
CC	GO:0030658	transport vesicle membrane	2/233	188/18678	0.682859	0.837053	0.811547	CD74/SCG3	2
CC	GO:0035770	ribonucleoprotein granule	2/233	188/18678	0.682859	0.837053	0.811547	AGO1/TSTD1	2
CC	GO:1990204	oxidoreductase complex	1/233	93/18678	0.689737	0.838072	0.812535	NCF2	1
CC	GO:0031968	organelle outer membrane	2/233	191/18678	0.691224	0.838072	0.812535	KMO/IFI27	2
CC	GO:0019867	outer membrane	2/233	193/18678	0.696699	0.838072	0.812535	KMO/IFI27	2
CC	GO:0005903	brush border	1/233	95/18678	0.697468	0.838072	0.812535	LCTL	1
CC	GO:0045095	keratin filament	1/233	97/18678	0.705007	0.838072	0.812535	KRT13	1
CC	GO:0044438	microbody part	1/233	98/18678	0.708706	0.838072	0.812535	AGXT	1
CC	GO:0044439	peroxisomal part	1/233	98/18678	0.708706	0.838072	0.812535	AGXT	1
CC	GO:0030667	secretory granule membrane	3/233	293/18678	0.710927	0.838072	0.812535	SCG3/PTAFR/C5AR1	3
CC	GO:0016605	PML body	1/233	99/18678	0.712359	0.838072	0.812535	HIPK1	1
CC	GO:0000793	condensed chromosome	2/233	199/18678	0.712647	0.838072	0.812535	SKA1/PINX1	2
CC	GO:0005930	axoneme	1/233	100/18678	0.715966	0.838072	0.812535	TUBB4A	1
CC	GO:0043679	axon terminus	1/233	101/18678	0.719529	0.838072	0.812535	PRKCB	1
CC	GO:0097014	ciliary plasm	1/233	101/18678	0.719529	0.838072	0.812535	TUBB4A	1
CC	GO:0030660	Golgi-associated vesicle membrane	1/233	102/18678	0.723046	0.838955	0.813391	CD74	1
CC	GO:0001669	acrosomal vesicle	1/233	103/18678	0.72652	0.83978	0.814191	NCF2	1
CC	GO:0005912	adherens junction	5/233	496/18678	0.74465	0.857476	0.831348	ACTN2/SH3BP1/FRS2/DPP4/DLL1	5
CC	GO:0036064	ciliary basal body	1/233	111/18678	0.752794	0.863582	0.837268	TTLL6	1
CC	GO:0031253	cell projection membrane	3/233	317/18678	0.759477	0.864503	0.838161	RIPOR2/TACR3/DPP4	3
CC	GO:0044441	ciliary part	4/233	415/18678	0.763902	0.864503	0.838161	TUBB4A/TACR3/TTLL6/CATSPERZ	4
CC	GO:0005793	endoplasmic reticulum-Golgi intermediate compartment	1/233	115/18678	0.764972	0.864503	0.838161	AZIN2	1
CC	GO:0099055	integral component of postsynaptic membrane	1/233	115/18678	0.764972	0.864503	0.838161	CACNG4	1
CC	GO:0044306	neuron projection terminus	1/233	120/18678	0.779358	0.873566	0.846948	PRKCB	1
CC	GO:0098936	intrinsic component of postsynaptic membrane	1/233	120/18678	0.779358	0.873566	0.846948	CACNG4	1
CC	GO:0005795	Golgi stack	1/233	124/18678	0.790233	0.873566	0.846948	CLN3	1
CC	GO:0031461	cullin-RING ubiquitin ligase complex	1/233	124/18678	0.790233	0.873566	0.846948	FBXO32	1
CC	GO:0090575	RNA polymerase II transcription factor complex	1/233	124/18678	0.790233	0.873566	0.846948	MXI1	1
CC	GO:1904813	ficolin-1-rich granule lumen	1/233	124/18678	0.790233	0.873566	0.846948	CAB39	1
CC	GO:0005769	early endosome	3/233	340/18678	0.799639	0.880762	0.853924	APOB/SLC35D3/CLN3	3
CC	GO:0005777	peroxisome	1/233	130/18678	0.805552	0.880892	0.85405	AGXT	1
CC	GO:0042579	microbody	1/233	130/18678	0.805552	0.880892	0.85405	AGXT	1
CC	GO:0098978	glutamatergic synapse	3/233	352/18678	0.818278	0.891601	0.864433	CACNG4/PAK3/ACTN2	3
CC	GO:0033267	axon part	3/233	354/18678	0.821238	0.89163	0.864461	TUBB4A/PRKCB/KCNQ3	3
CC	GO:0044798	nuclear transcription factor complex	1/233	140/18678	0.828648	0.896474	0.869157	MXI1	1
CC	GO:0010008	endosome membrane	4/233	464/18678	0.834047	0.899115	0.871718	APOB/SLA2/ATP6V0E2/LEPROT	4
CC	GO:0044452	nucleolar part	1/233	151/18678	0.85091	0.912841	0.885026	CDKN2AIP	1
CC	GO:0099699	integral component of synaptic membrane	1/233	152/18678	0.852785	0.912841	0.885026	CACNG4	1
CC	GO:0042581	specific granule	1/233	160/18678	0.866964	0.924762	0.896583	TCN1	1
CC	GO:0099240	intrinsic component of synaptic membrane	1/233	164/18678	0.873535	0.928513	0.90022	CACNG4	1
CC	GO:0044450	microtubule organizing center part	1/233	170/18678	0.88279	0.935081	0.906588	PAX2	1
CC	GO:0032838	plasma membrane bounded cell projection cytoplasm	1/233	181/18678	0.898041	0.947932	0.919048	TUBB4A	1
CC	GO:0101002	ficolin-1-rich granule	1/233	185/18678	0.903083	0.949956	0.92101	CAB39	1
CC	GO:0005819	spindle	2/233	326/18678	0.916377	0.960615	0.931345	SKA1/PINX1	2
CC	GO:0005759	mitochondrial matrix	3/233	448/18678	0.920758	0.961892	0.932582	ALDH1L2/MMAA/AGXT	3
CC	GO:0005882	intermediate filament	1/233	206/18678	0.925749	0.963794	0.934426	KRT13	1
CC	GO:0005813	centrosome	3/233	473/18678	0.936935	0.97211	0.942489	PAX2/HIPK1/RAPSN	3
CC	GO:0000151	ubiquitin ligase complex	1/233	224/18678	0.940923	0.972927	0.943281	FBXO32	1
CC	GO:0019866	organelle inner membrane	3/233	489/18678	0.945633	0.974483	0.94479	IFI6/IFI27/GATM	3
CC	GO:0045111	intermediate filament cytoskeleton	1/233	245/18678	0.954765	0.976413	0.946661	KRT13	1
CC	GO:0005925	focal adhesion	2/233	397/18678	0.960248	0.976413	0.946661	ACTN2/DPP4	2
CC	GO:0005924	cell-substrate adherens junction	2/233	399/18678	0.961088	0.976413	0.946661	ACTN2/DPP4	2
CC	GO:0030055	cell-substrate junction	2/233	404/18678	0.963115	0.976413	0.946661	ACTN2/DPP4	2
CC	GO:0150034	distal axon	1/233	262/18678	0.963565	0.976413	0.946661	PRKCB	1
CC	GO:0031965	nuclear membrane	1/233	281/18678	0.971398	0.98108	0.951185	IFI27	1
CC	GO:0005743	mitochondrial inner membrane	2/233	445/18678	0.976317	0.982782	0.952836	IFI6/GATM	2
CC	GO:0016607	nuclear speck	1/233	386/18678	0.992527	0.995169	0.964845	HIPK1	1
CC	GO:0005635	nuclear envelope	1/233	420/18678	0.995169	0.995169	0.964845	IFI27	1

## Sheet: MF
ONTOLOGY	ID	Description	GeneRatio	BgRatio	pvalue	p.adjust	qvalue	geneID	Count
MF	GO:0005506	iron ion binding	8/215	144/16969	0.000502543	0.140753	0.132546	EGLN3/TET1/CYP39A1/CYP4F11/CYP4X1/HBA2/CYP2B6/HBA1	8
MF	GO:0046906	tetrapyrrole binding	7/215	116/16969	0.000689968	0.140753	0.132546	HMOX1/TCN1/CYP39A1/CYP4F11/CYP4X1/IDO2/CYP2B6	7
MF	GO:0016705	oxidoreductase activity, acting on paired donors, with incorporation or reduction of molecular oxygen	7/215	137/16969	0.00182159	0.187665	0.176723	HMOX1/KMO/EGLN3/TET1/CYP39A1/CYP4F11/CYP4X1	7
MF	GO:0015077	monovalent inorganic cation transmembrane transporter activity	10/215	266/16969	0.00214523	0.187665	0.176723	TRPM5/SLC1A3/SLC6A2/SLC8A2/SCN3A/KCNJ16/SLC24A2/ATP6V0E2/KCNQ3/ATP6AP1L	10
MF	GO:0020037	heme binding	6/215	106/16969	0.00229982	0.187665	0.176723	HMOX1/CYP39A1/CYP4F11/CYP4X1/IDO2/CYP2B6	6
MF	GO:0005104	fibroblast growth factor receptor binding	3/215	25/16969	0.00375549	0.202434	0.19063	FGF8/FGF19/FRS2	3
MF	GO:0015081	sodium ion transmembrane transporter activity	6/215	117/16969	0.0037609	0.202434	0.19063	TRPM5/SLC1A3/SLC6A2/SLC8A2/SCN3A/SLC24A2	6
MF	GO:0048037	cofactor binding	13/215	438/16969	0.00396929	0.202434	0.19063	HMOX1/KMO/EGLN3/DDC/TCN1/SDSL/CYP39A1/PGAM2/CYP4F11/AGXT/CYP4X1/IDO2/CYP2B6	13
MF	GO:0004497	monooxygenase activity	5/215	86/16969	0.00472999	0.211057	0.19875	KMO/CYP39A1/CYP4F11/CYP4X1/CYP2B6	5
MF	GO:0019842	vitamin binding	6/215	128/16969	0.00581893	0.211057	0.19875	EGLN3/DDC/TCN1/SDSL/RBP7/AGXT	6
MF	GO:0030957	Tat protein binding	2/215	10/16969	0.00672484	0.211057	0.19875	TRIM32/DLL1	2
MF	GO:0036442	proton-exporting ATPase activity	2/215	10/16969	0.00672484	0.211057	0.19875	ATP6V0E2/ATP6AP1L	2
MF	GO:0046961	proton-transporting ATPase activity, rotational mechanism	2/215	10/16969	0.00672484	0.211057	0.19875	ATP6V0E2/ATP6AP1L	2
MF	GO:0099516	ion antiporter activity	3/215	37/16969	0.0113529	0.323661	0.304789	SLC8A2/SLC24A2/SLC26A9	3
MF	GO:0022804	active transmembrane transporter activity	8/215	241/16969	0.0118993	0.323661	0.304789	SLC1A3/SLC6A2/SLC8A2/SLC16A7/SLC24A2/ATP6V0E2/SLC26A9/ATP6AP1L	8
MF	GO:0044769	ATPase activity, coupled to transmembrane movement of ions, rotational mechanism	2/215	15/16969	0.0150521	0.333198	0.31377	ATP6V0E2/ATP6AP1L	2
MF	GO:0050664	oxidoreductase activity, acting on NAD(P)H, oxygen as acceptor	2/215	16/16969	0.0170603	0.333198	0.31377	NCF2/KMO	2
MF	GO:0008081	phosphoric diester hydrolase activity	4/215	78/16969	0.0172435	0.333198	0.31377	HMOX1/PLD4/GDPD4/ENPP7	4
MF	GO:0030170	pyridoxal phosphate binding	3/215	44/16969	0.0181439	0.333198	0.31377	DDC/SDSL/AGXT	3
MF	GO:0070851	growth factor receptor binding	5/215	121/16969	0.018973	0.333198	0.31377	FGF8/PDGFC/FGF19/FRS2/GREM1	5
MF	GO:0015491	cation:cation antiporter activity	2/215	17/16969	0.0191755	0.333198	0.31377	SLC8A2/SLC24A2	2
MF	GO:0070279	vitamin B6 binding	3/215	45/16969	0.0192623	0.333198	0.31377	DDC/SDSL/AGXT	3
MF	GO:0015291	secondary active transmembrane transporter activity	6/215	172/16969	0.0224584	0.333198	0.31377	SLC1A3/SLC6A2/SLC8A2/SLC16A7/SLC24A2/SLC26A9	6
MF	GO:0015297	antiporter activity	3/215	48/16969	0.0228417	0.333198	0.31377	SLC8A2/SLC24A2/SLC26A9	3
MF	GO:0051213	dioxygenase activity	4/215	85/16969	0.0228727	0.333198	0.31377	EGLN3/BCO1/TET1/IDO2	4
MF	GO:0016769	transferase activity, transferring nitrogenous groups	2/215	19/16969	0.0237149	0.333198	0.31377	GATM/AGXT	2
MF	GO:0016597	amino acid binding	3/215	49/16969	0.0241097	0.333198	0.31377	SLC1A3/DDC/AGXT	3
MF	GO:0016830	carbon-carbon lyase activity	3/215	49/16969	0.0241097	0.333198	0.31377	DDC/AZIN2/HMGCLL1	3
MF	GO:0031406	carboxylic acid binding	6/215	176/16969	0.0247968	0.333198	0.31377	SLC1A3/EGLN3/DDC/CYP4F11/AGXT/ST8SIA3	6
MF	GO:0043177	organic acid binding	6/215	178/16969	0.0260247	0.333198	0.31377	SLC1A3/EGLN3/DDC/CYP4F11/AGXT/ST8SIA3	6
MF	GO:0005328	neurotransmitter:sodium symporter activity	2/215	20/16969	0.0261332	0.333198	0.31377	SLC1A3/SLC6A2	2
MF	GO:0015298	solute:cation antiporter activity	2/215	20/16969	0.0261332	0.333198	0.31377	SLC8A2/SLC24A2	2
MF	GO:0004252	serine-type endopeptidase activity	5/215	133/16969	0.0272065	0.336371	0.316758	RHBDL3/KLK7/PRSS57/PRTN3/DPP4	5
MF	GO:0048018	receptor ligand activity	10/215	397/16969	0.0302946	0.363536	0.342339	WNT8B/CMTM1/FGF8/CD70/PDGFC/NODAL/FGF19/GREM1/CXCL11/C17orf99	10
MF	GO:0005112	Notch binding	2/215	22/16969	0.0312529	0.364319	0.343077	CHAC1/DLL1	2
MF	GO:0016702	oxidoreductase activity, acting on single donors with incorporation of molecular oxygen, incorporation of two atoms of oxygen	2/215	23/16969	0.0339487	0.384752	0.362319	BCO1/IDO2	2
MF	GO:0016701	oxidoreductase activity, acting on single donors with incorporation of molecular oxygen	2/215	24/16969	0.0367318	0.405042	0.381425	BCO1/IDO2	2
MF	GO:0019955	cytokine binding	4/215	100/16969	0.0383362	0.41161	0.38761	CD74/CCR7/LRRC32/GREM1	4
MF	GO:0035255	ionotropic glutamate receptor binding	2/215	26/16969	0.0425487	0.440667	0.414973	CACNG4/RAPSN	2
MF	GO:0030545	receptor regulator activity	10/215	425/16969	0.0447457	0.440667	0.414973	WNT8B/CMTM1/FGF8/CD70/PDGFC/NODAL/FGF19/GREM1/CXCL11/C17orf99	10
MF	GO:0008324	cation transmembrane transporter activity	11/215	484/16969	0.0447507	0.440667	0.414973	TRPM5/SLC1A3/SLC6A2/SLC8A2/AZIN2/SCN3A/KCNJ16/SLC24A2/ATP6V0E2/KCNQ3/ATP6AP1L	11
MF	GO:0016782	transferase activity, transferring sulfur-containing groups	3/215	63/16969	0.0457452	0.440667	0.414973	HS3ST3B1/CHST5/TSTD1	3
MF	GO:0005125	cytokine activity	5/215	154/16969	0.0464428	0.440667	0.414973	CMTM1/CD70/GREM1/CXCL11/C17orf99	5
MF	GO:0008236	serine-type peptidase activity	5/215	158/16969	0.0508328	0.460008	0.433186	RHBDL3/KLK7/PRSS57/PRTN3/DPP4	5
MF	GO:0015079	potassium ion transmembrane transporter activity	4/215	110/16969	0.0512891	0.460008	0.433186	TRPM5/KCNJ16/SLC24A2/KCNQ3	4
MF	GO:0033764	steroid dehydrogenase activity, acting on the CH-OH group of donors, NAD or NADP as acceptor	2/215	29/16969	0.0518637	0.460008	0.433186	HSD17B3/SDR42E1	2
MF	GO:0004175	endopeptidase activity	8/215	322/16969	0.0531055	0.460136	0.433307	RHBDL3/MMEL1/KLK7/PRSS57/PRTN3/DPP4/KEL/ASPRV1	8
MF	GO:0015293	symporter activity	4/215	112/16969	0.0541337	0.460136	0.433307	SLC1A3/SLC6A2/SLC16A7/SLC24A2	4
MF	GO:0017171	serine hydrolase activity	5/215	163/16969	0.0566515	0.464031	0.436975	RHBDL3/KLK7/PRSS57/PRTN3/DPP4	5
MF	GO:0022890	inorganic cation transmembrane transporter activity	10/215	444/16969	0.0568666	0.464031	0.436975	TRPM5/SLC1A3/SLC6A2/SLC8A2/SCN3A/KCNJ16/SLC24A2/ATP6V0E2/KCNQ3/ATP6AP1L	10
MF	GO:0016229	steroid dehydrogenase activity	2/215	31/16969	0.0584385	0.467508	0.440249	HSD17B3/SDR42E1	2
MF	GO:0016709	oxidoreductase activity, acting on paired donors, with incorporation or reduction of molecular oxygen, NAD(P)H as one donor, and incorporation of one atom of oxygen	2/215	33/16969	0.0652837	0.495958	0.46704	KMO/CYP4F11	2
MF	GO:0016831	carboxy-lyase activity	2/215	33/16969	0.0652837	0.495958	0.46704	DDC/AZIN2	2
MF	GO:0046873	metal ion transmembrane transporter activity	8/215	337/16969	0.0656415	0.495958	0.46704	TRPM5/SLC1A3/SLC6A2/SLC8A2/SCN3A/KCNJ16/SLC24A2/KCNQ3	8
MF	GO:1901618	organic hydroxy compound transmembrane transporter activity	2/215	36/16969	0.0760199	0.549256	0.51723	SLC6A2/SLC16A7	2
MF	GO:0004601	peroxidase activity	2/215	37/16969	0.0797152	0.549256	0.51723	HBA2/HBA1	2
MF	GO:0005272	sodium channel activity	2/215	37/16969	0.0797152	0.549256	0.51723	TRPM5/SCN3A	2
MF	GO:0005326	neurotransmitter transporter activity	2/215	37/16969	0.0797152	0.549256	0.51723	SLC1A3/SLC6A2	2
MF	GO:0019829	cation-transporting ATPase activity	2/215	37/16969	0.0797152	0.549256	0.51723	ATP6V0E2/ATP6AP1L	2
MF	GO:0022853	active ion transmembrane transporter activity	2/215	38/16969	0.0834653	0.549256	0.51723	ATP6V0E2/ATP6AP1L	2
MF	GO:0035254	glutamate receptor binding	2/215	38/16969	0.0834653	0.549256	0.51723	CACNG4/RAPSN	2
MF	GO:0042625	ATPase coupled ion transmembrane transporter activity	2/215	38/16969	0.0834653	0.549256	0.51723	ATP6V0E2/ATP6AP1L	2
MF	GO:0008047	enzyme activator activity	9/215	419/16969	0.0861927	0.550848	0.51873	RGS17/SH3BP1/NCF2/CAB39/AZIN2/FRS2/GREM1/NUPR1/ARHGAP8	9
MF	GO:0004620	phospholipase activity	3/215	83/16969	0.0884093	0.550848	0.51873	HMOX1/PLD4/ENPP7	3
MF	GO:0005246	calcium channel regulator activity	2/215	40/16969	0.0911223	0.550848	0.51873	CACNG4/PRKCB	2
MF	GO:0016684	oxidoreductase activity, acting on peroxide as acceptor	2/215	40/16969	0.0911223	0.550848	0.51873	HBA2/HBA1	2
MF	GO:0016706	oxidoreductase activity, acting on paired donors, with incorporation or reduction of molecular oxygen, 2-oxoglutarate as one donor, and incorporation of one atom each of oxygen into both donors	2/215	40/16969	0.0911223	0.550848	0.51873	EGLN3/TET1	2
MF	GO:0005539	glycosaminoglycan binding	5/215	199/16969	0.109224	0.550848	0.51873	ANOS1/APOB/CXCL11/BGN/PRSS57	5
MF	GO:0030374	nuclear receptor transcription coactivator activity	2/215	45/16969	0.111092	0.550848	0.51873	ACTN2/PRKCB	2
MF	GO:0008083	growth factor activity	4/215	147/16969	0.116903	0.550848	0.51873	FGF8/PDGFC/NODAL/FGF19	4
MF	GO:0008201	heparin binding	4/215	148/16969	0.119031	0.550848	0.51873	ANOS1/APOB/CXCL11/PRSS57	4
MF	GO:0005267	potassium channel activity	3/215	95/16969	0.119703	0.550848	0.51873	TRPM5/KCNJ16/KCNQ3	3
MF	GO:0005068	transmembrane receptor protein tyrosine kinase adaptor activity	1/215	10/16969	0.119746	0.550848	0.51873	FRS2	1
MF	GO:0005165	neurotrophin receptor binding	1/215	10/16969	0.119746	0.550848	0.51873	FRS2	1
MF	GO:0005313	L-glutamate transmembrane transporter activity	1/215	10/16969	0.119746	0.550848	0.51873	SLC1A3	1
MF	GO:0005372	water transmembrane transporter activity	1/215	10/16969	0.119746	0.550848	0.51873	SLC14A1	1
MF	GO:0015172	acidic amino acid transmembrane transporter activity	1/215	10/16969	0.119746	0.550848	0.51873	SLC1A3	1
MF	GO:0016595	glutamate binding	1/215	10/16969	0.119746	0.550848	0.51873	SLC1A3	1
MF	GO:0031419	cobalamin binding	1/215	10/16969	0.119746	0.550848	0.51873	TCN1	1
MF	GO:0033130	acetylcholine receptor binding	1/215	10/16969	0.119746	0.550848	0.51873	RAPSN	1
MF	GO:0045236	CXCR chemokine receptor binding	1/215	10/16969	0.119746	0.550848	0.51873	CXCL11	1
MF	GO:0046974	histone methyltransferase activity (H3-K9 specific)	1/215	10/16969	0.119746	0.550848	0.51873	PRDM16	1
MF	GO:0070696	transmembrane receptor protein serine/threonine kinase binding	1/215	10/16969	0.119746	0.550848	0.51873	NODAL	1
MF	GO:0008146	sulfotransferase activity	2/215	48/16969	0.123571	0.550848	0.51873	HS3ST3B1/CHST5	2
MF	GO:0005172	vascular endothelial growth factor receptor binding	1/215	11/16969	0.130906	0.550848	0.51873	GREM1	1
MF	GO:0008179	adenylate cyclase binding	1/215	11/16969	0.130906	0.550848	0.51873	ADCYAP1R1	1
MF	GO:0016840	carbon-nitrogen lyase activity	1/215	11/16969	0.130906	0.550848	0.51873	CHAC1	1
MF	GO:0019211	phosphatase activator activity	1/215	11/16969	0.130906	0.550848	0.51873	FRS2	1
MF	GO:0030546	receptor activator activity	1/215	11/16969	0.130906	0.550848	0.51873	GREM1	1
MF	GO:0036122	BMP binding	1/215	11/16969	0.130906	0.550848	0.51873	GREM1	1
MF	GO:0048185	activin binding	1/215	11/16969	0.130906	0.550848	0.51873	ACVR1B	1
MF	GO:0016298	lipase activity	3/215	100/16969	0.133797	0.550848	0.51873	HMOX1/PLD4/ENPP7	3
MF	GO:0005244	voltage-gated ion channel activity	4/215	158/16969	0.141204	0.550848	0.51873	TRPM5/SCN3A/KCNJ16/KCNQ3	4
MF	GO:0022832	voltage-gated channel activity	4/215	158/16969	0.141204	0.550848	0.51873	TRPM5/SCN3A/KCNJ16/KCNQ3	4
MF	GO:0004065	arylsulfatase activity	1/215	12/16969	0.141925	0.550848	0.51873	ARSI	1
MF	GO:0004526	ribonuclease P activity	1/215	12/16969	0.141925	0.550848	0.51873	RPPH1	1
MF	GO:0015296	anion:cation symporter activity	1/215	12/16969	0.141925	0.550848	0.51873	SLC6A2	1
MF	GO:0016500	protein-hormone receptor activity	1/215	12/16969	0.141925	0.550848	0.51873	TSHR	1
MF	GO:0016722	oxidoreductase activity, oxidizing metal ions	1/215	12/16969	0.141925	0.550848	0.51873	CP	1
MF	GO:0017049	GTP-Rho binding	1/215	12/16969	0.141925	0.550848	0.51873	CDC42EP5	1
MF	GO:0033691	sialic acid binding	1/215	12/16969	0.141925	0.550848	0.51873	ST8SIA3	1
MF	GO:0004708	MAP kinase kinase activity	1/215	13/16969	0.152804	0.550848	0.51873	PAK3	1
MF	GO:0005355	glucose transmembrane transporter activity	1/215	13/16969	0.152804	0.550848	0.51873	SLC2A4	1
MF	GO:0005521	lamin binding	1/215	13/16969	0.152804	0.550848	0.51873	IFI27	1
MF	GO:0008271	secondary active sulfate transmembrane transporter activity	1/215	13/16969	0.152804	0.550848	0.51873	SLC26A9	1
MF	GO:0015116	sulfate transmembrane transporter activity	1/215	13/16969	0.152804	0.550848	0.51873	SLC26A9	1
MF	GO:0015149	hexose transmembrane transporter activity	1/215	13/16969	0.152804	0.550848	0.51873	SLC2A4	1
MF	GO:0031432	titin binding	1/215	13/16969	0.152804	0.550848	0.51873	ACTN2	1
MF	GO:0003713	transcription coactivator activity	6/215	285/16969	0.154519	0.550848	0.51873	ACTN2/TRIM32/PRDM16/PRKCB/NUPR1/POU3F1	6
MF	GO:0003924	GTPase activity	5/215	224/16969	0.155889	0.550848	0.51873	RGS17/TUBB4A/MMAA/TUBA3E/RHEBL1	5
MF	GO:0015370	solute:sodium symporter activity	2/215	56/16969	0.158293	0.550848	0.51873	SLC1A3/SLC6A2	2
MF	GO:0043621	protein self-association	2/215	56/16969	0.158293	0.550848	0.51873	TRIM32/AGXT	2
MF	GO:0004549	tRNA-specific ribonuclease activity	1/215	14/16969	0.163547	0.550848	0.51873	RPPH1	1
MF	GO:0005161	platelet-derived growth factor receptor binding	1/215	14/16969	0.163547	0.550848	0.51873	PDGFC	1
MF	GO:0016881	acid-amino acid ligase activity	1/215	14/16969	0.163547	0.550848	0.51873	TTLL6	1
MF	GO:0019841	retinol binding	1/215	14/16969	0.163547	0.550848	0.51873	RBP7	1
MF	GO:0030228	lipoprotein particle receptor activity	1/215	14/16969	0.163547	0.550848	0.51873	ILDR1	1
MF	GO:0035173	histone kinase activity	1/215	14/16969	0.163547	0.550848	0.51873	PRKCB	1
MF	GO:0044183	protein binding involved in protein folding	1/215	14/16969	0.163547	0.550848	0.51873	CD74	1
MF	GO:0050998	nitric-oxide synthase binding	1/215	14/16969	0.163547	0.550848	0.51873	CD74	1
MF	GO:0016829	lyase activity	4/215	168/16969	0.164878	0.550848	0.51873	CHAC1/DDC/AZIN2/HMGCLL1	4
MF	GO:0008484	sulfuric ester hydrolase activity	1/215	15/16969	0.174153	0.550848	0.51873	ARSI	1
MF	GO:0015145	monosaccharide transmembrane transporter activity	1/215	15/16969	0.174153	0.550848	0.51873	SLC2A4	1
MF	GO:0004675	transmembrane receptor protein serine/threonine kinase activity	1/215	16/16969	0.184626	0.550848	0.51873	ACVR1B	1
MF	GO:0004697	protein kinase C activity	1/215	16/16969	0.184626	0.550848	0.51873	PRKCB	1
MF	GO:0005003	ephrin receptor activity	1/215	16/16969	0.184626	0.550848	0.51873	EPHA5	1
MF	GO:0005242	inward rectifier potassium channel activity	1/215	16/16969	0.184626	0.550848	0.51873	KCNJ16	1
MF	GO:0008157	protein phosphatase 1 binding	1/215	16/16969	0.184626	0.550848	0.51873	PHACTR3	1
MF	GO:0016918	retinal binding	1/215	16/16969	0.184626	0.550848	0.51873	RBP7	1
MF	GO:0023026	MHC class II protein complex binding	1/215	16/16969	0.184626	0.550848	0.51873	CD74	1
MF	GO:0033612	receptor serine/threonine kinase binding	1/215	16/16969	0.184626	0.550848	0.51873	NODAL	1
MF	GO:0003725	double-stranded RNA binding	2/215	62/16969	0.185376	0.550848	0.51873	AGO1/OASL	2
MF	GO:0005249	voltage-gated potassium channel activity	2/215	62/16969	0.185376	0.550848	0.51873	KCNJ16/KCNQ3	2
MF	GO:0042626	ATPase activity, coupled to transmembrane movement of substances	2/215	62/16969	0.185376	0.550848	0.51873	ATP6V0E2/ATP6AP1L	2
MF	GO:0033613	activating transcription factor binding	2/215	64/16969	0.194547	0.550848	0.51873	PRDM16/IFI27	2
MF	GO:0005248	voltage-gated sodium channel activity	1/215	17/16969	0.194967	0.550848	0.51873	SCN3A	1
MF	GO:0005343	organic acid:sodium symporter activity	1/215	17/16969	0.194967	0.550848	0.51873	SLC1A3	1
MF	GO:0008329	signaling pattern recognition receptor activity	1/215	17/16969	0.194967	0.550848	0.51873	PTAFR	1
MF	GO:0008483	transaminase activity	1/215	17/16969	0.194967	0.550848	0.51873	AGXT	1
MF	GO:0016755	transferase activity, transferring amino-acyl groups	1/215	17/16969	0.194967	0.550848	0.51873	TGM4	1
MF	GO:0034237	protein kinase A regulatory subunit binding	1/215	17/16969	0.194967	0.550848	0.51873	C2orf88	1
MF	GO:0051119	sugar transmembrane transporter activity	1/215	17/16969	0.194967	0.550848	0.51873	SLC2A4	1
MF	GO:0016209	antioxidant activity	2/215	65/16969	0.199155	0.550848	0.51873	HBA2/HBA1	2
MF	GO:0019199	transmembrane receptor protein kinase activity	2/215	65/16969	0.199155	0.550848	0.51873	ACVR1B/EPHA5	2
MF	GO:0038187	pattern recognition receptor activity	1/215	18/16969	0.205177	0.550848	0.51873	PTAFR	1
MF	GO:0003727	single-stranded RNA binding	2/215	68/16969	0.213051	0.550848	0.51873	AGO1/MSI1	2
MF	GO:0015399	primary active transmembrane transporter activity	2/215	68/16969	0.213051	0.550848	0.51873	ATP6V0E2/ATP6AP1L	2
MF	GO:0015405	P-P-bond-hydrolysis-driven transmembrane transporter activity	2/215	68/16969	0.213051	0.550848	0.51873	ATP6V0E2/ATP6AP1L	2
MF	GO:0030295	protein kinase activator activity	2/215	68/16969	0.213051	0.550848	0.51873	CAB39/GREM1	2
MF	GO:0004653	polypeptide N-acetylgalactosaminyltransferase activity	1/215	19/16969	0.215258	0.550848	0.51873	GALNT13	1
MF	GO:0008395	steroid hydroxylase activity	1/215	19/16969	0.215258	0.550848	0.51873	CYP39A1	1
MF	GO:0015301	anion:anion antiporter activity	1/215	19/16969	0.215258	0.550848	0.51873	SLC26A9	1
MF	GO:0017127	cholesterol transporter activity	1/215	19/16969	0.215258	0.550848	0.51873	APOB	1
MF	GO:0030296	protein tyrosine kinase activator activity	1/215	19/16969	0.215258	0.550848	0.51873	GREM1	1
MF	GO:0043492	ATPase activity, coupled to movement of substances	2/215	69/16969	0.217704	0.550848	0.51873	ATP6V0E2/ATP6AP1L	2
MF	GO:0015078	proton transmembrane transporter activity	2/215	70/16969	0.222366	0.550848	0.51873	ATP6V0E2/ATP6AP1L	2
MF	GO:0015294	solute:cation symporter activity	2/215	70/16969	0.222366	0.550848	0.51873	SLC1A3/SLC6A2	2
MF	GO:0001848	complement binding	1/215	20/16969	0.225212	0.550848	0.51873	C5AR1	1
MF	GO:0004190	aspartic-type endopeptidase activity	1/215	20/16969	0.225212	0.550848	0.51873	ASPRV1	1
MF	GO:0008266	poly(U) RNA binding	1/215	20/16969	0.225212	0.550848	0.51873	MSI1	1
MF	GO:0008373	sialyltransferase activity	1/215	20/16969	0.225212	0.550848	0.51873	ST8SIA3	1
MF	GO:0008519	ammonium transmembrane transporter activity	1/215	20/16969	0.225212	0.550848	0.51873	AZIN2	1
MF	GO:0015101	organic cation transmembrane transporter activity	1/215	20/16969	0.225212	0.550848	0.51873	AZIN2	1
MF	GO:0030506	ankyrin binding	1/215	20/16969	0.225212	0.550848	0.51873	SPTB	1
MF	GO:0031418	L-ascorbic acid binding	1/215	20/16969	0.225212	0.550848	0.51873	EGLN3	1
MF	GO:0050662	coenzyme binding	5/215	257/16969	0.227556	0.550848	0.51873	KMO/EGLN3/DDC/SDSL/AGXT	5
MF	GO:0046332	SMAD binding	2/215	72/16969	0.231713	0.550848	0.51873	ACVR1B/PRDM16	2
MF	GO:0016866	intramolecular transferase activity	1/215	21/16969	0.23504	0.550848	0.51873	PGAM2	1
MF	GO:0030021	extracellular matrix structural constituent conferring compression resistance	1/215	21/16969	0.23504	0.550848	0.51873	BGN	1
MF	GO:0050431	transforming growth factor beta binding	1/215	21/16969	0.23504	0.550848	0.51873	LRRC32	1
MF	GO:0050750	low-density lipoprotein particle receptor binding	1/215	21/16969	0.23504	0.550848	0.51873	APOB	1
MF	GO:0051861	glycolipid binding	1/215	21/16969	0.23504	0.550848	0.51873	CEACAM5	1
MF	GO:0070034	telomerase RNA binding	1/215	21/16969	0.23504	0.550848	0.51873	PINX1	1
MF	GO:0070330	aromatase activity	1/215	21/16969	0.23504	0.550848	0.51873	CYP4X1	1
MF	GO:0001618	virus receptor activity	2/215	74/16969	0.241085	0.550848	0.51873	ITGB7/DPP4	2
MF	GO:0019209	kinase activator activity	2/215	74/16969	0.241085	0.550848	0.51873	CAB39/GREM1	2
MF	GO:0104005	hijacked molecular function	2/215	74/16969	0.241085	0.550848	0.51873	ITGB7/DPP4	2
MF	GO:0008187	poly-pyrimidine tract binding	1/215	22/16969	0.244745	0.550848	0.51873	MSI1	1
MF	GO:0015248	sterol transporter activity	1/215	22/16969	0.244745	0.550848	0.51873	APOB	1
MF	GO:0051019	mitogen-activated protein kinase binding	1/215	22/16969	0.244745	0.550848	0.51873	PTAFR	1
MF	GO:0070001	aspartic-type peptidase activity	1/215	22/16969	0.244745	0.550848	0.51873	ASPRV1	1
MF	GO:0015108	chloride transmembrane transporter activity	2/215	75/16969	0.245777	0.550848	0.51873	SLC6A2/SLC26A9	2
MF	GO:0016741	transferase activity, transferring one-carbon groups	4/215	201/16969	0.251217	0.550848	0.51873	ALDH1L2/PRDM16/GATM/METTL7A	4
MF	GO:0005227	calcium activated cation channel activity	1/215	23/16969	0.254326	0.550848	0.51873	TRPM5	1
MF	GO:0005310	dicarboxylic acid transmembrane transporter activity	1/215	23/16969	0.254326	0.550848	0.51873	SLC1A3	1
MF	GO:0016712	oxidoreductase activity, acting on paired donors, with incorporation or reduction of molecular oxygen, reduced flavin or flavoprotein as one donor, and incorporation of one atom of oxygen	1/215	23/16969	0.254326	0.550848	0.51873	CYP4X1	1
MF	GO:0019956	chemokine binding	1/215	23/16969	0.254326	0.550848	0.51873	CCR7	1
MF	GO:0031369	translation initiation factor binding	1/215	23/16969	0.254326	0.550848	0.51873	TRIM32	1
MF	GO:0019208	phosphatase regulator activity	2/215	77/16969	0.255172	0.550848	0.51873	PHACTR3/FRS2	2
MF	GO:0022838	substrate-specific channel activity	6/215	338/16969	0.258437	0.55223	0.520031	TRPM5/SLC14A1/SCN3A/KCNJ16/SLC26A9/KCNQ3	6
MF	GO:0004896	cytokine receptor activity	2/215	78/16969	0.259873	0.55223	0.520031	CD74/CCR7	2
MF	GO:0035591	signaling adaptor activity	2/215	78/16969	0.259873	0.55223	0.520031	SLA2/FRS2	2
MF	GO:0001637	G protein-coupled chemoattractant receptor activity	1/215	25/16969	0.273128	0.565666	0.532684	CCR7	1
MF	GO:0004950	chemokine receptor activity	1/215	25/16969	0.273128	0.565666	0.532684	CCR7	1
MF	GO:0023023	MHC protein complex binding	1/215	25/16969	0.273128	0.565666	0.532684	CD74	1
MF	GO:0046875	ephrin receptor binding	1/215	25/16969	0.273128	0.565666	0.532684	ANKS1B	1
MF	GO:0071949	FAD binding	1/215	25/16969	0.273128	0.565666	0.532684	KMO	1
MF	GO:0005126	cytokine receptor binding	4/215	210/16969	0.276303	0.569352	0.536155	CD70/FRS2/GREM1/CXCL11	4
MF	GO:0008028	monocarboxylic acid transmembrane transporter activity	1/215	26/16969	0.282351	0.575996	0.542412	SLC16A7	1
MF	GO:0070325	lipoprotein particle receptor binding	1/215	26/16969	0.282351	0.575996	0.542412	APOB	1
MF	GO:0035257	nuclear hormone receptor binding	3/215	147/16969	0.285751	0.580032	0.546211	PADI2/OASL/PRKCB	3
MF	GO:0003712	transcription coregulator activity	8/215	494/16969	0.29009	0.580072	0.54625	ACTN2/TRIM32/MXI1/PRDM16/ZHX1/PRKCB/NUPR1/POU3F1	8
MF	GO:0043539	protein serine/threonine kinase activator activity	1/215	27/16969	0.291458	0.580072	0.54625	CAB39	1
MF	GO:0046966	thyroid hormone receptor binding	1/215	27/16969	0.291458	0.580072	0.54625	OASL	1
MF	GO:1901682	sulfur compound transmembrane transporter activity	1/215	27/16969	0.291458	0.580072	0.54625	SLC26A9	1
MF	GO:0005504	fatty acid binding	1/215	28/16969	0.30045	0.59219	0.557661	CYP4F11	1
MF	GO:0015144	carbohydrate transmembrane transporter activity	1/215	28/16969	0.30045	0.59219	0.557661	SLC2A4	1
MF	GO:0035258	steroid hormone receptor binding	2/215	88/16969	0.306812	0.598074	0.563202	PADI2/PRKCB	2
MF	GO:1901681	sulfur compound binding	4/215	221/16969	0.307482	0.598074	0.563202	ANOS1/APOB/CXCL11/PRSS57	4
MF	GO:0003779	actin binding	6/215	361/16969	0.308448	0.598074	0.563202	SPTB/ACTN2/PHACTR3/SLC6A2/TNNT2/PLEKHH2	6
MF	GO:0042056	chemoattractant activity	1/215	29/16969	0.309328	0.598074	0.563202	FGF8	1
MF	GO:0004222	metalloendopeptidase activity	2/215	89/16969	0.311483	0.598074	0.563202	MMEL1/KEL	2
MF	GO:0030674	protein binding, bridging	3/215	156/16969	0.316884	0.598074	0.563202	SLA2/TNNT2/FRS2	3
MF	GO:0001530	lipopolysaccharide binding	1/215	30/16969	0.318094	0.598074	0.563202	PTAFR	1
MF	GO:0005164	tumor necrosis factor receptor binding	1/215	30/16969	0.318094	0.598074	0.563202	CD70	1
MF	GO:0008009	chemokine activity	1/215	30/16969	0.318094	0.598074	0.563202	CXCL11	1
MF	GO:0071889	14-3-3 protein binding	1/215	30/16969	0.318094	0.598074	0.563202	RIPOR2	1
MF	GO:0005201	extracellular matrix structural constituent	3/215	158/16969	0.323818	0.602386	0.567263	ANOS1/MUC17/BGN	3
MF	GO:0015179	L-amino acid transmembrane transporter activity	1/215	31/16969	0.326749	0.602386	0.567263	SLC1A3	1
MF	GO:0016891	endoribonuclease activity, producing 5'-phosphomonoesters	1/215	31/16969	0.326749	0.602386	0.567263	RPPH1	1
MF	GO:0035198	miRNA binding	1/215	31/16969	0.326749	0.602386	0.567263	AGO1	1
MF	GO:0015267	channel activity	6/215	370/16969	0.328484	0.602386	0.567263	TRPM5/SLC14A1/SCN3A/KCNJ16/SLC26A9/KCNQ3	6
MF	GO:0004674	protein serine/threonine kinase activity	6/215	371/16969	0.330722	0.602386	0.567263	PAK3/ACVR1B/CAB39/TSSK3/HIPK1/PRKCB	6
MF	GO:0022803	passive transmembrane transporter activity	6/215	371/16969	0.330722	0.602386	0.567263	TRPM5/SLC14A1/SCN3A/KCNJ16/SLC26A9/KCNQ3	6
MF	GO:0008376	acetylgalactosaminyltransferase activity	1/215	32/16969	0.335295	0.60531	0.570016	GALNT13	1
MF	GO:0042887	amide transmembrane transporter activity	1/215	32/16969	0.335295	0.60531	0.570016	SLC14A1	1
MF	GO:0004864	protein phosphatase inhibitor activity	1/215	33/16969	0.343732	0.613336	0.577574	PHACTR3	1
MF	GO:0016651	oxidoreductase activity, acting on NAD(P)H	2/215	96/16969	0.343973	0.613336	0.577574	NCF2/KMO	2
MF	GO:0042578	phosphoric ester hydrolase activity	5/215	305/16969	0.34425	0.613336	0.577574	HMOX1/PTPN7/PLD4/GDPD4/ENPP7	5
MF	GO:0046943	carboxylic acid transmembrane transporter activity	2/215	98/16969	0.35317	0.626493	0.589964	SLC1A3/SLC16A7	2
MF	GO:0005342	organic acid transmembrane transporter activity	2/215	99/16969	0.357752	0.630893	0.594107	SLC1A3/SLC16A7	2
MF	GO:0005501	retinoid binding	1/215	35/16969	0.36029	0.630893	0.594107	RBP7	1
MF	GO:0043014	alpha-tubulin binding	1/215	35/16969	0.36029	0.630893	0.594107	SLC6A2	1
MF	GO:0008509	anion transmembrane transporter activity	4/215	240/16969	0.362014	0.631204	0.5944	SLC1A3/SLC6A2/SLC16A7/SLC26A9	4
MF	GO:0051427	hormone receptor binding	3/215	170/16969	0.365361	0.634227	0.597247	PADI2/OASL/PRKCB	3
MF	GO:0008307	structural constituent of muscle	1/215	36/16969	0.368412	0.634227	0.597247	ACTN2	1
MF	GO:0019840	isoprenoid binding	1/215	36/16969	0.368412	0.634227	0.597247	RBP7	1
MF	GO:0001102	RNA polymerase II activating transcription factor binding	1/215	37/16969	0.376431	0.638512	0.601282	IFI27	1
MF	GO:0061980	regulatory RNA binding	1/215	37/16969	0.376431	0.638512	0.601282	AGO1	1
MF	GO:0099106	ion channel regulator activity	2/215	104/16969	0.38048	0.638512	0.601282	CACNG4/PRKCB	2
MF	GO:0008188	neuropeptide receptor activity	1/215	38/16969	0.384349	0.638512	0.601282	SORCS1	1
MF	GO:0019212	phosphatase inhibitor activity	1/215	38/16969	0.384349	0.638512	0.601282	PHACTR3	1
MF	GO:0042287	MHC protein binding	1/215	38/16969	0.384349	0.638512	0.601282	CD74	1
MF	GO:0048487	beta-tubulin binding	1/215	38/16969	0.384349	0.638512	0.601282	SLC6A2	1
MF	GO:0008528	G protein-coupled peptide receptor activity	2/215	105/16969	0.384985	0.638512	0.601282	SORCS1/CCR7	2
MF	GO:0015085	calcium ion transmembrane transporter activity	2/215	105/16969	0.384985	0.638512	0.601282	SLC8A2/SLC24A2	2
MF	GO:0001653	peptide receptor activity	2/215	106/16969	0.389477	0.640752	0.603392	SORCS1/CCR7	2
MF	GO:0022843	voltage-gated cation channel activity	2/215	106/16969	0.389477	0.640752	0.603392	KCNJ16/KCNQ3	2
MF	GO:0016893	endonuclease activity, active with either ribo- or deoxyribonucleic acids and producing 5'-phosphomonoesters	1/215	39/16969	0.392167	0.642586	0.605119	RPPH1	1
MF	GO:0016616	oxidoreductase activity, acting on the CH-OH group of donors, NAD or NADP as acceptor	2/215	108/16969	0.398416	0.647434	0.609684	HSD17B3/SDR42E1	2
MF	GO:0004712	protein serine/threonine/tyrosine kinase activity	1/215	40/16969	0.399886	0.647434	0.609684	PAK3	1
MF	GO:0016879	ligase activity, forming carbon-nitrogen bonds	1/215	40/16969	0.399886	0.647434	0.609684	TTLL6	1
MF	GO:0005261	cation channel activity	4/215	254/16969	0.402186	0.648585	0.610767	TRPM5/SCN3A/KCNJ16/KCNQ3	4
MF	GO:0005216	ion channel activity	5/215	329/16969	0.404543	0.649465	0.611596	TRPM5/SCN3A/KCNJ16/SLC26A9/KCNQ3	5
MF	GO:0004177	aminopeptidase activity	1/215	41/16969	0.407507	0.649465	0.611596	DPP4	1
MF	GO:0030331	estrogen receptor binding	1/215	41/16969	0.407507	0.649465	0.611596	PADI2	1
MF	GO:0000993	RNA polymerase II complex binding	1/215	42/16969	0.415033	0.65633	0.618061	AGO1	1
MF	GO:0001047	core promoter binding	1/215	42/16969	0.415033	0.65633	0.618061	AGO1	1
MF	GO:0005178	integrin binding	2/215	113/16969	0.420493	0.660401	0.621895	ACTN2/ISG15	2
MF	GO:0018024	histone-lysine N-methyltransferase activity	1/215	43/16969	0.422463	0.660401	0.621895	PRDM16	1
MF	GO:0050840	extracellular matrix binding	1/215	43/16969	0.422463	0.660401	0.621895	BGN	1
MF	GO:0050681	androgen receptor binding	1/215	44/16969	0.429799	0.669305	0.630279	PRKCB	1
MF	GO:0044325	ion channel binding	2/215	116/16969	0.433541	0.67035	0.631264	ACTN2/ID2	2
MF	GO:0008375	acetylglucosaminyltransferase activity	1/215	45/16969	0.437042	0.67035	0.631264	MFNG	1
MF	GO:0032813	tumor necrosis factor receptor superfamily binding	1/215	45/16969	0.437042	0.67035	0.631264	CD70	1
MF	GO:0051018	protein kinase A binding	1/215	45/16969	0.437042	0.67035	0.631264	C2orf88	1
MF	GO:0022839	ion gated channel activity	4/215	267/16969	0.439088	0.670625	0.631522	TRPM5/SCN3A/KCNJ16/KCNQ3	4
MF	GO:0022836	gated channel activity	4/215	268/16969	0.441902	0.670625	0.631522	TRPM5/SCN3A/KCNJ16/KCNQ3	4
MF	GO:0015103	inorganic anion transmembrane transporter activity	2/215	118/16969	0.442152	0.670625	0.631522	SLC6A2/SLC26A9	2
MF	GO:0005080	protein kinase C binding	1/215	46/16969	0.444194	0.671226	0.632088	PRKCB	1
MF	GO:0016614	oxidoreductase activity, acting on CH-OH group of donors	2/215	120/16969	0.450691	0.674403	0.63508	HSD17B3/SDR42E1	2
MF	GO:0042379	chemokine receptor binding	1/215	47/16969	0.451255	0.674403	0.63508	CXCL11	1
MF	GO:0043022	ribosome binding	1/215	47/16969	0.451255	0.674403	0.63508	YTHDF3	1
MF	GO:0002020	protease binding	2/215	121/16969	0.454933	0.674955	0.6356	CD70/DPP4	2
MF	GO:0019838	growth factor binding	2/215	121/16969	0.454933	0.674955	0.6356	ACVR1B/LRRC32	2
MF	GO:0043175	RNA polymerase core enzyme binding	1/215	48/16969	0.458227	0.676302	0.636869	AGO1	1
MF	GO:0017124	SH3 domain binding	2/215	122/16969	0.459156	0.676302	0.636869	PAK3/SH3BP1	2
MF	GO:0004714	transmembrane receptor protein tyrosine kinase activity	1/215	49/16969	0.465111	0.682609	0.642807	EPHA5	1
MF	GO:0005096	GTPase activator activity	3/215	203/16969	0.476307	0.696535	0.655921	RGS17/SH3BP1/ARHGAP8	3
MF	GO:0048365	Rac GTPase binding	1/215	51/16969	0.478618	0.696916	0.65628	NCF2	1
MF	GO:0016247	channel regulator activity	2/215	127/16969	0.479984	0.696916	0.65628	CACNG4/PRKCB	2
MF	GO:0004521	endoribonuclease activity	1/215	52/16969	0.485244	0.697111	0.656465	RPPH1	1
MF	GO:0005070	SH3/SH2 adaptor activity	1/215	52/16969	0.485244	0.697111	0.656465	SLA2	1
MF	GO:0042054	histone methyltransferase activity	1/215	52/16969	0.485244	0.697111	0.656465	PRDM16	1
MF	GO:0005543	phospholipid binding	5/215	363/16969	0.488542	0.699387	0.658607	ACTN2/APOB/CEACAM5/SNX22/PTAFR	5
MF	GO:0005507	copper ion binding	1/215	53/16969	0.491786	0.701569	0.660663	CP	1
MF	GO:0050839	cell adhesion molecule binding	6/215	444/16969	0.494528	0.703023	0.662031	ACTN2/ITGB7/LAD1/ISG15/HIST1H3F/HIST1H3C	6
MF	GO:0043130	ubiquitin binding	1/215	54/16969	0.498246	0.705848	0.664692	TRIM32	1
MF	GO:0015171	amino acid transmembrane transporter activity	1/215	55/16969	0.504623	0.712409	0.67087	SLC1A3	1
MF	GO:0000987	proximal promoter sequence-specific DNA binding	6/215	452/16969	0.511922	0.715131	0.673433	PAX2/AGO1/MYB/TBX2/HOXD13/DACH1	6
MF	GO:0019887	protein kinase regulator activity	2/215	136/16969	0.516211	0.715131	0.673433	CAB39/GREM1	2
MF	GO:0016279	protein-lysine N-methyltransferase activity	1/215	57/16969	0.517137	0.715131	0.673433	PRDM16	1
MF	GO:0060090	molecular adaptor activity	3/215	216/16969	0.517609	0.715131	0.673433	SLA2/TNNT2/FRS2	3
MF	GO:0035091	phosphatidylinositol binding	3/215	217/16969	0.520714	0.715131	0.673433	ACTN2/CEACAM5/SNX22	3
MF	GO:0016278	lysine N-methyltransferase activity	1/215	58/16969	0.523276	0.715131	0.673433	PRDM16	1
MF	GO:0030971	receptor tyrosine kinase binding	1/215	58/16969	0.523276	0.715131	0.673433	FRS2	1
MF	GO:0097110	scaffold protein binding	1/215	58/16969	0.523276	0.715131	0.673433	DLL1	1
MF	GO:0008194	UDP-glycosyltransferase activity	2/215	138/16969	0.524033	0.715131	0.673433	MFNG/GALNT13	2
MF	GO:0008514	organic anion transmembrane transporter activity	2/215	139/16969	0.527912	0.715131	0.673433	SLC1A3/SLC16A7	2
MF	GO:0061630	ubiquitin protein ligase activity	2/215	139/16969	0.527912	0.715131	0.673433	TRIM32/RNF152	2
MF	GO:0015238	drug transmembrane transporter activity	1/215	59/16969	0.529337	0.715131	0.673433	SLC1A3	1
MF	GO:0033293	monocarboxylic acid binding	1/215	59/16969	0.529337	0.715131	0.673433	CYP4F11	1
MF	GO:0001098	basal transcription machinery binding	1/215	60/16969	0.535321	0.716102	0.674347	AGO1	1
MF	GO:0001099	basal RNA polymerase II transcription machinery binding	1/215	60/16969	0.535321	0.716102	0.674347	AGO1	1
MF	GO:0017022	myosin binding	1/215	60/16969	0.535321	0.716102	0.674347	TRIM32	1
MF	GO:0005254	chloride channel activity	1/215	61/16969	0.54123	0.719583	0.677626	SLC26A9	1
MF	GO:0001227	DNA-binding transcription repressor activity, RNA polymerase II-specific	3/215	224/16969	0.542145	0.719583	0.677626	MXI1/TBX2/DACH1	3
MF	GO:0051015	actin filament binding	2/215	143/16969	0.543215	0.719583	0.677626	SPTB/ACTN2	2
MF	GO:0048029	monosaccharide binding	1/215	62/16969	0.547063	0.722336	0.680218	EGLN3	1
MF	GO:0061659	ubiquitin-like protein ligase activity	2/215	145/16969	0.550736	0.72484	0.682576	TRIM32/RNF152	2
MF	GO:0070063	RNA polymerase binding	1/215	63/16969	0.552823	0.725069	0.682792	AGO1	1
MF	GO:0017048	Rho GTPase binding	2/215	146/16969	0.554465	0.725069	0.682792	NCF2/CDC42EP5	2
MF	GO:0002039	p53 binding	1/215	65/16969	0.564125	0.733003	0.690263	CDKN2AIP	1
MF	GO:0005546	phosphatidylinositol-4,5-bisphosphate binding	1/215	65/16969	0.564125	0.733003	0.690263	ACTN2	1
MF	GO:0019888	protein phosphatase regulator activity	1/215	66/16969	0.569669	0.737857	0.694834	PHACTR3	1
MF	GO:0030695	GTPase regulator activity	3/215	235/16969	0.574684	0.740246	0.697084	RGS17/SH3BP1/ARHGAP8	3
MF	GO:0050660	flavin adenine dinucleotide binding	1/215	67/16969	0.575142	0.740246	0.697084	KMO	1
MF	GO:0008237	metallopeptidase activity	2/215	153/16969	0.579949	0.744085	0.700699	MMEL1/KEL	2
MF	GO:0019207	kinase regulator activity	2/215	154/16969	0.583501	0.746296	0.702782	CAB39/GREM1	2
MF	GO:0032182	ubiquitin-like protein binding	1/215	70/16969	0.591151	0.753718	0.70977	TRIM32	1
MF	GO:0001540	amyloid-beta binding	1/215	71/16969	0.596353	0.755627	0.711568	CD74	1
MF	GO:0043178	alcohol binding	1/215	71/16969	0.596353	0.755627	0.711568	RBP7	1
MF	GO:0005253	anion channel activity	1/215	72/16969	0.601488	0.759775	0.715474	SLC26A9	1
MF	GO:0046982	protein heterodimerization activity	6/215	497/16969	0.604965	0.761465	0.717066	ZHX1/HIST1H3F/HIST1H3C/HIST1H2AB/HIST1H4A/HIST1H4B	6
MF	GO:0004867	serine-type endopeptidase inhibitor activity	1/215	73/16969	0.606559	0.761465	0.717066	ANOS1	1
MF	GO:0031267	small GTPase binding	4/215	333/16969	0.611784	0.765669	0.721024	ADCYAP1R1/NCF2/CDC42EP5/RNF152	4
MF	GO:0015631	tubulin binding	3/215	252/16969	0.62206	0.771882	0.726875	SLC6A2/SKA1/TTLL6	3
MF	GO:0030246	carbohydrate binding	3/215	252/16969	0.62206	0.771882	0.726875	EGLN3/GALNT13/PKD1L2	3
MF	GO:0005200	structural constituent of cytoskeleton	1/215	77/16969	0.626208	0.771882	0.726875	SPTB	1
MF	GO:0031490	chromatin DNA binding	1/215	77/16969	0.626208	0.771882	0.726875	HIST1H1B	1
MF	GO:0051117	ATPase binding	1/215	77/16969	0.626208	0.771882	0.726875	SLC26A9	1
MF	GO:0005516	calmodulin binding	2/215	168/16969	0.630918	0.775346	0.730137	SLC8A2/KCNQ3	2
MF	GO:0016757	transferase activity, transferring glycosyl groups	3/215	257/16969	0.635295	0.776498	0.731222	MFNG/GALNT13/ST8SIA3	3
MF	GO:0030165	PDZ domain binding	1/215	79/16969	0.635663	0.776498	0.731222	MUC17	1
MF	GO:0008276	protein methyltransferase activity	1/215	80/16969	0.640301	0.777508	0.732173	PRDM16	1
MF	GO:1990782	protein tyrosine kinase binding	1/215	80/16969	0.640301	0.777508	0.732173	FRS2	1
MF	GO:0000978	RNA polymerase II proximal promoter sequence-specific DNA binding	5/215	432/16969	0.642791	0.778216	0.73284	AGO1/MYB/TBX2/HOXD13/DACH1	5
MF	GO:0051082	unfolded protein binding	1/215	83/16969	0.653864	0.78928	0.743259	CLN3	1
MF	GO:0019902	phosphatase binding	2/215	177/16969	0.659128	0.792816	0.746588	PHACTR3/PVRIG	2
MF	GO:0060589	nucleoside-triphosphatase regulator activity	3/215	267/16969	0.660792	0.792816	0.746588	RGS17/SH3BP1/ARHGAP8	3
MF	GO:0038024	cargo receptor activity	1/215	85/16969	0.662623	0.792816	0.746588	ILDR1	1
MF	GO:0008170	N-methyltransferase activity	1/215	86/16969	0.666919	0.795623	0.749232	PRDM16	1
MF	GO:0051087	chaperone binding	1/215	91/16969	0.687596	0.815521	0.76797	CP	1
MF	GO:0099094	ligand-gated cation channel activity	1/215	91/16969	0.687596	0.815521	0.76797	KCNJ16	1
MF	GO:0004725	protein tyrosine phosphatase activity	1/215	92/16969	0.691576	0.817864	0.770176	PTPN7	1
MF	GO:0004540	ribonuclease activity	1/215	94/16969	0.699384	0.821466	0.773569	RPPH1	1
MF	GO:0008168	methyltransferase activity	2/215	191/16969	0.699556	0.821466	0.773569	PRDM16/METTL7A	2
MF	GO:1902936	phosphatidylinositol bisphosphate binding	1/215	96/16969	0.706996	0.821466	0.773569	ACTN2	1
MF	GO:0016758	transferase activity, transferring hexosyl groups	2/215	194/16969	0.707687	0.821466	0.773569	MFNG/GALNT13	2
MF	GO:0008238	exopeptidase activity	1/215	97/16969	0.710729	0.821466	0.773569	DPP4	1
MF	GO:0009055	electron transfer activity	1/215	97/16969	0.710729	0.821466	0.773569	NCF2	1
MF	GO:0016810	hydrolase activity, acting on carbon-nitrogen (but not peptide) bonds	1/215	97/16969	0.710729	0.821466	0.773569	PADI2	1
MF	GO:0019783	ubiquitin-like protein-specific protease activity	1/215	97/16969	0.710729	0.821466	0.773569	SENP8	1
MF	GO:0140101	catalytic activity, acting on a tRNA	1/215	99/16969	0.718055	0.827589	0.779334	RPPH1	1
MF	GO:0042826	histone deacetylase binding	1/215	102/16969	0.728699	0.836028	0.787281	HIST1H1B	1
MF	GO:0045296	cadherin binding	3/215	297/16969	0.729476	0.836028	0.787281	LAD1/HIST1H3F/HIST1H3C	3
MF	GO:0005319	lipid transporter activity	1/215	103/16969	0.732157	0.836395	0.787627	APOB	1
MF	GO:0001664	G protein-coupled receptor binding	2/215	205/16969	0.735945	0.836395	0.787627	CXCL11/NPW	2
MF	GO:0003714	transcription corepressor activity	2/215	205/16969	0.735945	0.836395	0.787627	MXI1/ZHX1	2
MF	GO:0004519	endonuclease activity	1/215	105/16969	0.738942	0.837468	0.788637	RPPH1	1
MF	GO:0001158	enhancer sequence-specific DNA binding	1/215	107/16969	0.745556	0.840296	0.7913	HOXD13	1
MF	GO:0043021	ribonucleoprotein complex binding	1/215	107/16969	0.745556	0.840296	0.7913	YTHDF3	1
MF	GO:0047485	protein N-terminus binding	1/215	109/16969	0.752004	0.845227	0.795944	SLA2	1
MF	GO:0042277	peptide binding	2/215	215/16969	0.759593	0.848529	0.799054	CD74/ADCYAP1R1	2
MF	GO:0005525	GTP binding	3/215	313/16969	0.761418	0.848529	0.799054	IFI44L/MMAA/RHEBL1	3
MF	GO:0001085	RNA polymerase II transcription factor binding	1/215	113/16969	0.764415	0.848529	0.799054	IFI27	1
MF	GO:0042623	ATPase activity, coupled	2/215	218/16969	0.766322	0.848529	0.799054	ATP6V0E2/ATP6AP1L	2
MF	GO:0015276	ligand-gated ion channel activity	1/215	114/16969	0.76742	0.848529	0.799054	KCNJ16	1
MF	GO:0022834	ligand-gated channel activity	1/215	114/16969	0.76742	0.848529	0.799054	KCNJ16	1
MF	GO:0032550	purine ribonucleoside binding	3/215	318/16969	0.770755	0.849914	0.800358	IFI44L/MMAA/RHEBL1	3
MF	GO:0001883	purine nucleoside binding	3/215	321/16969	0.776214	0.853301	0.803547	IFI44L/MMAA/RHEBL1	3
MF	GO:0032549	ribonucleoside binding	3/215	322/16969	0.77801	0.853301	0.803547	IFI44L/MMAA/RHEBL1	3
MF	GO:0004713	protein tyrosine kinase activity	1/215	120/16969	0.784665	0.853931	0.80414	EPHA5	1
MF	GO:0035326	enhancer binding	1/215	121/16969	0.787412	0.853931	0.80414	HOXD13	1
MF	GO:0016853	isomerase activity	1/215	122/16969	0.790125	0.853931	0.80414	PGAM2	1
MF	GO:0001882	nucleoside binding	3/215	329/16969	0.790254	0.853931	0.80414	IFI44L/MMAA/RHEBL1	3
MF	GO:0051020	GTPase binding	4/215	426/16969	0.791821	0.853931	0.80414	ADCYAP1R1/NCF2/CDC42EP5/RNF152	4
MF	GO:0019001	guanyl nucleotide binding	3/215	331/16969	0.793648	0.853931	0.80414	IFI44L/MMAA/RHEBL1	3
MF	GO:0032561	guanyl ribonucleotide binding	3/215	331/16969	0.793648	0.853931	0.80414	IFI44L/MMAA/RHEBL1	3
MF	GO:0004857	enzyme inhibitor activity	3/215	332/16969	0.795328	0.853931	0.80414	ANOS1/PHACTR3/PINX1	3
MF	GO:0003682	chromatin binding	4/215	437/16969	0.807908	0.865161	0.814716	HOXD13/PRKCB/NUPR1/HIST1H1B	4
MF	GO:0019903	protein phosphatase binding	1/215	132/16969	0.815429	0.870929	0.820147	PHACTR3	1
MF	GO:0016874	ligase activity	1/215	134/16969	0.820113	0.873645	0.822705	TTLL6	1
MF	GO:0008757	S-adenosylmethionine-dependent methyltransferase activity	1/215	136/16969	0.824678	0.87622	0.82513	PRDM16	1
MF	GO:1901981	phosphatidylinositol phosphate binding	1/215	143/16969	0.839768	0.889936	0.838046	ACTN2	1
MF	GO:0008234	cysteine-type peptidase activity	1/215	148/16969	0.849748	0.897646	0.845306	SENP8	1
MF	GO:0004866	endopeptidase inhibitor activity	1/215	149/16969	0.851668	0.897646	0.845306	ANOS1	1
MF	GO:0033218	amide binding	2/215	266/16969	0.853643	0.897646	0.845306	CD74/ADCYAP1R1	2
MF	GO:0061135	endopeptidase regulator activity	1/215	154/16969	0.86091	0.901532	0.848966	ANOS1	1
MF	GO:0003735	structural constituent of ribosome	1/215	157/16969	0.866178	0.901532	0.848966	RNA5-8SN1	1
MF	GO:0004721	phosphoprotein phosphatase activity	1/215	157/16969	0.866178	0.901532	0.848966	PTPN7	1
MF	GO:0030414	peptidase inhibitor activity	1/215	157/16969	0.866178	0.901532	0.848966	ANOS1	1
MF	GO:0016887	ATPase activity	2/215	280/16969	0.872858	0.905989	0.853163	ATP6V0E2/ATP6AP1L	2
MF	GO:0001228	DNA-binding transcription activator activity, RNA polymerase II-specific	3/215	390/16969	0.874901	0.905989	0.853163	MYB/HOXD13/HNF1A	3
MF	GO:0008017	microtubule binding	1/215	166/16969	0.880819	0.909808	0.856759	SKA1	1
MF	GO:0004518	nuclease activity	1/215	171/16969	0.888252	0.915169	0.861807	RPPH1	1
MF	GO:0042393	histone binding	1/215	174/16969	0.892488	0.917217	0.863736	PRKCB	1
MF	GO:0004842	ubiquitin-protein transferase activity	2/215	305/16969	0.901518	0.924169	0.870283	TRIM32/RNF152	2
MF	GO:0008022	protein C-terminus binding	1/215	186/16969	0.907894	0.928373	0.874242	NCF2	1
MF	GO:0061134	peptidase regulator activity	1/215	192/16969	0.914752	0.931691	0.877367	ANOS1	1
MF	GO:0017016	Ras GTPase binding	2/215	320/16969	0.915707	0.931691	0.877367	NCF2/CDC42EP5	2
MF	GO:0019787	ubiquitin-like protein transferase activity	2/215	329/16969	0.923278	0.937058	0.882421	TRIM32/RNF152	2
MF	GO:0000287	magnesium ion binding	1/215	209/16969	0.931544	0.943101	0.888111	TSSK3	1
MF	GO:0016746	transferase activity, transferring acyl groups	1/215	217/16969	0.938263	0.947553	0.892303	TGM4	1
MF	GO:0016791	phosphatase activity	1/215	224/16969	0.943601	0.950591	0.895164	PTPN7	1
MF	GO:0140098	catalytic activity, acting on RNA	1/215	268/16969	0.968084	0.971281	0.914648	RPPH1	1
MF	GO:0031625	ubiquitin protein ligase binding	1/215	270/16969	0.9689	0.971281	0.914648	ACVR1B	1
MF	GO:0044389	ubiquitin-like protein ligase binding	1/215	286/16969	0.974726	0.974726	0.917892	ACVR1B	1
