# Supplementary material for: Ox-LDL-mediated ILF3 overexpression in gastric cancer progression by activating the PI3K/AKT/mTOR signaling pathway
Source: Aging (Albany NY). 2022 May 4;14(9):3887–909. doi: 10.18632/aging.204051 (PMC9134943; doi:10.18632/aging.204051)
Supplement: Supplementary Table 3 [file aging-14-204051-s003.xlsx]

## Sheet: Sheet 1
Supplementary Table 3. The significant signaling pathways that ILF3 identified by KEGG pathway analysis.
EPMA Journal:Ox-LDL-mediated ILF3 overexpression in gastric cancer progression by activating the PI3K/AKT/mTOR signalling pathway: Potential for target therapy in the context of 3P medcine
Danping Sun, Mingxiang Zhang, Meng Wei,Zhaoyang Wang,Wen Qiao, Peng Liu, Xin Zhong,Yize Liang,Yuanyuan Chen,Yadi Huang,Wenbin Yu*
*Corresponding author: Wenbin Yu; Department of Gastrointestinal Surgery, General Surgery, Qilu Hospital, Cheeloo College of Medicine, Shandong University, 107 West Wen Hua Road,Jinan, 250012, China. email: wenbin_yu2003@163.com
ID	Description	GeneRatio	BgRatio	pvalue	p.adjust	qvalue	geneID	Count
hsa05143	African trypanosomiasis	4/107	37/8011	0.00141545	0.179501	0.175952	PRKCB/HBA2/IDO2/HBA1	4
hsa00260	Glycine, serine and threonine metabolism	4/107	40/8011	0.00189948	0.179501	0.175952	SDSL/PGAM2/GATM/AGXT	4
hsa04978	Mineral absorption	4/107	58/8011	0.0073418	0.462533	0.453388	HMOX1/SLC8A2/SLC26A9/MT1F	4
hsa00380	Tryptophan metabolism	3/107	42/8011	0.0182376	0.585908	0.574324	KMO/DDC/IDO2	3
hsa05412	Arrhythmogenic right ventricular cardiomyopathy (ARVC)	4/107	77/8011	0.0193275	0.585908	0.574324	CACNG4/ACTN2/SLC8A2/ITGB7	4
hsa04540	Gap junction	4/107	88/8011	0.0298222	0.585908	0.574324	TUBB4A/PDGFC/TUBA3E/PRKCB	4
hsa05410	Hypertrophic cardiomyopathy (HCM)	4/107	90/8011	0.0320302	0.585908	0.574324	CACNG4/SLC8A2/TNNT2/ITGB7	4
hsa05322	Systemic lupus erythematosus	5/107	133/8011	0.0323964	0.585908	0.574324	HIST1H3F/HIST1H3C/HIST1H2AB/HIST1H4A/HIST1H4B	5
hsa05034	Alcoholism	6/107	184/8011	0.036303	0.585908	0.574324	DDC/HIST1H3F/HIST1H3C/HIST1H2AB/HIST1H4A/HIST1H4B	6
hsa04350	TGF-beta signaling pathway	4/107	94/8011	0.0367283	0.585908	0.574324	ID2/ACVR1B/NODAL/GREM1	4
hsa04550	Signaling pathways regulating pluripotency of stem cells	5/107	140/8011	0.039102	0.585908	0.574324	WNT8B/LHX5/ID2/ACVR1B/NODAL	5
hsa05414	Dilated cardiomyopathy (DCM)	4/107	96/8011	0.0392189	0.585908	0.574324	CACNG4/SLC8A2/TNNT2/ITGB7	4
hsa00534	Glycosaminoglycan biosynthesis - heparan sulfate / heparin	2/107	24/8011	0.0403006	0.585908	0.574324	HS3ST3B1/NDST2	2
hsa04150	mTOR signaling pathway	5/107	153/8011	0.0536644	0.724469	0.710145	WNT8B/CAB39/DEPTOR/PRKCB/RNF152	5
hsa05218	Melanoma	3/107	72/8011	0.0713138	0.850525	0.833708	FGF8/PDGFC/FGF19	3
hsa04721	Synaptic vesicle cycle	3/107	78/8011	0.0860025	0.850525	0.833708	SLC1A3/SLC6A2/ATP6V0E2	3
hsa04060	Cytokine-cytokine receptor interaction	7/107	294/8011	0.097875	0.850525	0.833708	CCL22/CD70/CCR7/ACVR1B/NODAL/CXCL11/IFNE	7
hsa04216	Ferroptosis	2/107	40/8011	0.099399	0.850525	0.833708	CP/HMOX1	2
hsa05202	Transcriptional misregulation in cancer	5/107	186/8011	0.103005	0.850525	0.833708	ID2/ITGB7/NUPR1/HIST1H3F/HIST1H3C	5
hsa04260	Cardiac muscle contraction	3/107	86/8011	0.107393	0.850525	0.833708	CACNG4/SLC8A2/TNNT2	3
hsa04911	Insulin secretion	3/107	86/8011	0.107393	0.850525	0.833708	ADCYAP1R1/KCNN3/PRKCB	3
hsa00860	Porphyrin and chlorophyll metabolism	2/107	42/8011	0.107889	0.850525	0.833708	CP/HMOX1	2
hsa00514	Other types of O-glycan biosynthesis	2/107	46/8011	0.125411	0.850525	0.833708	MFNG/GALNT13	2
hsa00072	Synthesis and degradation of ketone bodies	1/107	10/8011	0.125884	0.850525	0.833708	HMGCLL1	1
hsa05224	Breast cancer	4/107	147/8011	0.133364	0.850525	0.833708	WNT8B/FGF8/FGF19/DLL1	4
hsa05150	Staphylococcus aureus infection	3/107	96/8011	0.136696	0.850525	0.833708	PTAFR/KRT13/C5AR1	3
hsa05231	Choline metabolism in cancer	3/107	98/8011	0.14286	0.850525	0.833708	PCYT1B/PDGFC/PRKCB	3
hsa00330	Arginine and proline metabolism	2/107	50/8011	0.143555	0.850525	0.833708	AZIN2/GATM	2
hsa05144	Malaria	2/107	50/8011	0.143555	0.850525	0.833708	HBA2/HBA1	2
hsa04145	Phagosome	4/107	152/8011	0.145429	0.850525	0.833708	TUBB4A/NCF2/TUBA3E/ATP6V0E2	4
hsa04061	Viral protein interaction with cytokine and cytokine receptor	3/107	100/8011	0.149115	0.850525	0.833708	CCL22/CCR7/CXCL11	3
hsa04015	Rap1 signaling pathway	5/107	210/8011	0.149298	0.850525	0.833708	FYB1/FGF8/PDGFC/FGF19/PRKCB	5
hsa04810	Regulation of actin cytoskeleton	5/107	213/8011	0.155631	0.850525	0.833708	PAK3/FGF8/ITGB7/PDGFC/FGF19	5
hsa04330	Notch signaling pathway	2/107	53/8011	0.157505	0.850525	0.833708	MFNG/DLL1	2
hsa04961	Endocrine and other factor-regulated calcium reabsorption	2/107	53/8011	0.157505	0.850525	0.833708	SLC8A2/PRKCB	2
hsa04080	Neuroactive ligand-receptor interaction	7/107	340/8011	0.168787	0.878069	0.860708	GIPR/ADCYAP1R1/TSHR/PTAFR/TACR3/NPW/C5AR1	7
hsa04066	HIF-1 signaling pathway	3/107	109/8011	0.178294	0.878069	0.860708	HMOX1/EGLN3/PRKCB	3
hsa04014	Ras signaling pathway	5/107	232/8011	0.19817	0.878069	0.860708	PAK3/FGF8/PDGFC/FGF19/PRKCB	5
hsa04726	Serotonergic synapse	3/107	115/8011	0.198558	0.878069	0.860708	DDC/PRKCB/CYP4X1	3
hsa04010	MAPK signaling pathway	6/107	295/8011	0.201341	0.878069	0.860708	CACNG4/FGF8/PTPN7/PDGFC/FGF19/PRKCB	6
hsa00120	Primary bile acid biosynthesis	1/107	17/8011	0.204531	0.878069	0.860708	CYP39A1	1
hsa00360	Phenylalanine metabolism	1/107	17/8011	0.204531	0.878069	0.860708	DDC	1
hsa01200	Carbon metabolism	3/107	117/8011	0.205435	0.878069	0.860708	SDSL/PGAM2/AGXT	3
hsa04929	GnRH secretion	2/107	64/8011	0.210438	0.878069	0.860708	KCNN3/PRKCB	2
hsa00830	Retinol metabolism	2/107	67/8011	0.225199	0.878069	0.860708	BCO1/CYP2B6	2
hsa05031	Amphetamine addiction	2/107	69/8011	0.235084	0.878069	0.860708	DDC/PRKCB	2
hsa05211	Renal cell carcinoma	2/107	69/8011	0.235084	0.878069	0.860708	PAK3/EGLN3	2
hsa00670	One carbon pool by folate	1/107	20/8011	0.236051	0.878069	0.860708	ALDH1L2	1
hsa04622	RIG-I-like receptor signaling pathway	2/107	70/8011	0.240037	0.878069	0.860708	IFNE/ISG15	2
hsa04062	Chemokine signaling pathway	4/107	189/8011	0.245681	0.878069	0.860708	CCL22/CCR7/PRKCB/CXCL11	4
hsa04020	Calcium signaling pathway	4/107	193/8011	0.257386	0.878069	0.860708	SLC8A2/PRKCB/PTAFR/TACR3	4
hsa04918	Thyroid hormone synthesis	2/107	74/8011	0.25989	0.878069	0.860708	TSHR/PRKCB	2
hsa01230	Biosynthesis of amino acids	2/107	75/8011	0.26486	0.878069	0.860708	SDSL/PGAM2	2
hsa04971	Gastric acid secretion	2/107	75/8011	0.26486	0.878069	0.860708	KCNJ16/PRKCB	2
hsa00515	Mannose type O-glycan biosynthesis	1/107	23/8011	0.266334	0.878069	0.860708	FKTN	1
hsa05140	Leishmaniasis	2/107	77/8011	0.274799	0.878069	0.860708	NCF2/PRKCB	2
hsa04510	Focal adhesion	4/107	199/8011	0.27515	0.878069	0.860708	PAK3/ITGB7/PDGFC/PRKCB	4
hsa04977	Vitamin digestion and absorption	1/107	24/8011	0.276161	0.878069	0.860708	APOB	1
hsa05165	Human papillomavirus infection	6/107	330/8011	0.278496	0.878069	0.860708	WNT8B/MFNG/OASL/ITGB7/ATP6V0E2/ISG15	6
hsa01521	EGFR tyrosine kinase inhibitor resistance	2/107	79/8011	0.284734	0.878069	0.860708	PDGFC/PRKCB	2
hsa04950	Maturity onset diabetes of the young	1/107	26/8011	0.295427	0.878069	0.860708	HNF1A	1
hsa04146	Peroxisome	2/107	83/8011	0.304562	0.878069	0.860708	HMGCLL1/AGXT	2
hsa04742	Taste transduction	2/107	83/8011	0.304562	0.878069	0.860708	TRPM5/SCN3A	2
hsa04966	Collecting duct acid secretion	1/107	27/8011	0.304868	0.878069	0.860708	ATP6V0E2	1
hsa00650	Butanoate metabolism	1/107	28/8011	0.314184	0.878069	0.860708	HMGCLL1	1
hsa04012	ErbB signaling pathway	2/107	85/8011	0.314443	0.878069	0.860708	PAK3/PRKCB	2
hsa04610	Complement and coagulation cascades	2/107	85/8011	0.314443	0.878069	0.860708	CFHR3/C5AR1	2
hsa04261	Adrenergic signaling in cardiomyocytes	3/107	149/8011	0.320565	0.878069	0.860708	CACNG4/SLC8A2/TNNT2	3
hsa05226	Gastric cancer	3/107	149/8011	0.320565	0.878069	0.860708	WNT8B/FGF8/FGF19	3
hsa00630	Glyoxylate and dicarboxylate metabolism	1/107	30/8011	0.332447	0.897606	0.879859	AGXT	1
hsa00512	Mucin type O-glycan biosynthesis	1/107	31/8011	0.341396	0.908788	0.89082	GALNT13	1
hsa04974	Protein digestion and absorption	2/107	95/8011	0.363301	0.92441	0.906133	SLC8A2/DPP4	2
hsa04713	Circadian entrainment	2/107	97/8011	0.37293	0.92441	0.906133	ADCYAP1R1/PRKCB	2
hsa00564	Glycerophospholipid metabolism	2/107	98/8011	0.377724	0.92441	0.906133	PCYT1B/PLD4	2
hsa00250	Alanine, aspartate and glutamate metabolism	1/107	36/8011	0.384393	0.92441	0.906133	AGXT	1
hsa00350	Tyrosine metabolism	1/107	36/8011	0.384393	0.92441	0.906133	DDC	1
hsa05225	Hepatocellular carcinoma	3/107	168/8011	0.390124	0.92441	0.906133	WNT8B/HMOX1/PRKCB	3
hsa04916	Melanogenesis	2/107	101/8011	0.392012	0.92441	0.906133	WNT8B/PRKCB	2
hsa04960	Aldosterone-regulated sodium reabsorption	1/107	37/8011	0.392653	0.92441	0.906133	PRKCB	1
hsa04975	Fat digestion and absorption	1/107	41/8011	0.424607	0.92441	0.906133	APOB	1
hsa04931	Insulin resistance	2/107	108/8011	0.424768	0.92441	0.906133	PRKCB/SLC2A4	2
hsa04670	Leukocyte transendothelial migration	2/107	112/8011	0.44308	0.92441	0.906133	NCF2/PRKCB	2
hsa04725	Cholinergic synapse	2/107	112/8011	0.44308	0.92441	0.906133	PRKCB/KCNQ3	2
hsa04724	Glutamatergic synapse	2/107	114/8011	0.452117	0.92441	0.906133	SLC1A3/PRKCB	2
hsa04930	Type II diabetes mellitus	1/107	46/8011	0.462217	0.92441	0.906133	SLC2A4	1
hsa00565	Ether lipid metabolism	1/107	47/8011	0.469442	0.92441	0.906133	PLD4	1
hsa00600	Sphingolipid metabolism	1/107	47/8011	0.469442	0.92441	0.906133	ENPP7	1
hsa04973	Carbohydrate digestion and absorption	1/107	47/8011	0.469442	0.92441	0.906133	PRKCB	1
hsa00280	Valine, leucine and isoleucine degradation	1/107	48/8011	0.47657	0.92441	0.906133	HMGCLL1	1
hsa04152	AMPK signaling pathway	2/107	120/8011	0.478726	0.92441	0.906133	CAB39/SLC2A4	2
hsa00270	Cysteine and methionine metabolism	1/107	49/8011	0.483604	0.92441	0.906133	SDSL	1
hsa04672	Intestinal immune network for IgA production	1/107	49/8011	0.483604	0.92441	0.906133	ITGB7	1
hsa05030	Cocaine addiction	1/107	49/8011	0.483604	0.92441	0.906133	DDC	1
hsa04979	Cholesterol metabolism	1/107	50/8011	0.490543	0.92441	0.906133	APOB	1
hsa05110	Vibrio cholerae infection	1/107	50/8011	0.490543	0.92441	0.906133	ATP6V0E2	1
hsa05130	Pathogenic Escherichia coli infection	3/107	202/8011	0.509204	0.92441	0.906133	PAK3/TUBB4A/TUBA3E	3
hsa05320	Autoimmune thyroid disease	1/107	53/8011	0.510813	0.92441	0.906133	TSHR	1
hsa04151	PI3K-Akt signaling pathway	5/107	354/8011	0.514504	0.92441	0.906133	FGF8/MYB/ITGB7/PDGFC/FGF19	5
hsa05205	Proteoglycans in cancer	3/107	204/8011	0.515856	0.92441	0.906133	WNT8B/FRS2/PRKCB	3
hsa04923	Regulation of lipolysis in adipocytes	1/107	55/8011	0.52388	0.92441	0.906133	TSHR	1
hsa04068	FoxO signaling pathway	2/107	131/8011	0.52543	0.92441	0.906133	FBXO32/SLC2A4	2
hsa04650	Natural killer cell mediated cytotoxicity	2/107	131/8011	0.52543	0.92441	0.906133	PRKCB/NCR3	2
hsa04728	Dopaminergic synapse	2/107	132/8011	0.529536	0.92441	0.906133	DDC/PRKCB	2
hsa00480	Glutathione metabolism	1/107	56/8011	0.530284	0.92441	0.906133	CHAC1	1
hsa04370	VEGF signaling pathway	1/107	59/8011	0.548986	0.92441	0.906133	PRKCB	1
hsa04024	cAMP signaling pathway	3/107	216/8011	0.55474	0.92441	0.906133	GIPR/ADCYAP1R1/TSHR	3
hsa00140	Steroid hormone biosynthesis	1/107	60/8011	0.555055	0.92441	0.906133	HSD17B3	1
hsa04730	Long-term depression	1/107	60/8011	0.555055	0.92441	0.906133	PRKCB	1
hsa05418	Fluid shear stress and atherosclerosis	2/107	139/8011	0.557609	0.92441	0.906133	HMOX1/NCF2	2
hsa00590	Arachidonic acid metabolism	1/107	63/8011	0.57278	0.92441	0.906133	CYP2B6	1
hsa05217	Basal cell carcinoma	1/107	63/8011	0.57278	0.92441	0.906133	WNT8B	1
hsa05223	Non-small cell lung cancer	1/107	66/8011	0.589805	0.92441	0.906133	PRKCB	1
hsa04720	Long-term potentiation	1/107	67/8011	0.595329	0.92441	0.906133	PRKCB	1
hsa00010	Glycolysis / Gluconeogenesis	1/107	68/8011	0.60078	0.92441	0.906133	PGAM2	1
hsa04920	Adipocytokine signaling pathway	1/107	69/8011	0.606158	0.92441	0.906133	SLC2A4	1
hsa04924	Renin secretion	1/107	69/8011	0.606158	0.92441	0.906133	ADCYAP1R1	1
hsa05230	Central carbon metabolism in cancer	1/107	69/8011	0.606158	0.92441	0.906133	PGAM2	1
hsa04921	Oxytocin signaling pathway	2/107	153/8011	0.610162	0.92441	0.906133	CACNG4/PRKCB	2
hsa05120	Epithelial cell signaling in Helicobacter pylori infection	1/107	70/8011	0.611464	0.92441	0.906133	ATP6V0E2	1
hsa04390	Hippo signaling pathway	2/107	154/8011	0.613731	0.92441	0.906133	WNT8B/ID2	2
hsa00982	Drug metabolism - cytochrome P450	1/107	72/8011	0.621865	0.92441	0.906133	CYP2B6	1
hsa04115	p53 signaling pathway	1/107	72/8011	0.621865	0.92441	0.906133	MDM4	1
hsa04310	Wnt signaling pathway	2/107	160/8011	0.634626	0.92441	0.906133	WNT8B/PRKCB	2
hsa05214	Glioma	1/107	75/8011	0.636951	0.92441	0.906133	PRKCB	1
hsa00980	Metabolism of xenobiotics by cytochrome P450	1/107	76/8011	0.641846	0.92441	0.906133	CYP2B6	1
hsa04612	Antigen processing and presentation	1/107	78/8011	0.65144	0.92441	0.906133	CD74	1
hsa04662	B cell receptor signaling pathway	1/107	82/8011	0.669872	0.92441	0.906133	PRKCB	1
hsa04512	ECM-receptor interaction	1/107	88/8011	0.695724	0.92441	0.906133	ITGB7	1
hsa04727	GABAergic synapse	1/107	89/8011	0.699833	0.92441	0.906133	PRKCB	1
hsa04360	Axon guidance	2/107	181/8011	0.700884	0.92441	0.906133	PAK3/EPHA5	2
hsa04970	Salivary secretion	1/107	90/8011	0.703888	0.92441	0.906133	PRKCB	1
hsa03015	mRNA surveillance pathway	1/107	91/8011	0.707888	0.92441	0.906133	MSI1	1
hsa05032	Morphine addiction	1/107	91/8011	0.707888	0.92441	0.906133	PRKCB	1
hsa04658	Th1 and Th2 cell differentiation	1/107	92/8011	0.711834	0.92441	0.906133	DLL1	1
hsa04666	Fc gamma R-mediated phagocytosis	1/107	93/8011	0.715728	0.92441	0.906133	PRKCB	1
hsa04912	GnRH signaling pathway	1/107	93/8011	0.715728	0.92441	0.906133	PRKCB	1
hsa05323	Rheumatoid arthritis	1/107	93/8011	0.715728	0.92441	0.906133	ATP6V0E2	1
hsa05215	Prostate cancer	1/107	97/8011	0.730788	0.92441	0.906133	PDGFC	1
hsa01522	Endocrine resistance	1/107	98/8011	0.734428	0.92441	0.906133	DLL1	1
hsa04925	Aldosterone synthesis and secretion	1/107	98/8011	0.734428	0.92441	0.906133	PRKCB	1
hsa05017	Spinocerebellar ataxia	1/107	98/8011	0.734428	0.92441	0.906133	PRKCB	1
hsa04070	Phosphatidylinositol signaling system	1/107	99/8011	0.738019	0.92441	0.906133	PRKCB	1
hsa04750	Inflammatory mediator regulation of TRP channels	1/107	100/8011	0.741562	0.92441	0.906133	PRKCB	1
hsa04933	AGE-RAGE signaling pathway in diabetic complications	1/107	100/8011	0.741562	0.92441	0.906133	PRKCB	1
hsa04064	NF-kappa B signaling pathway	1/107	102/8011	0.748506	0.92441	0.906133	PRKCB	1
hsa04972	Pancreatic secretion	1/107	102/8011	0.748506	0.92441	0.906133	PRKCB	1
hsa05146	Amoebiasis	1/107	102/8011	0.748506	0.92441	0.906133	PRKCB	1
hsa05203	Viral carcinogenesis	2/107	201/8011	0.754514	0.92441	0.906133	HIST1H4A/HIST1H4B	2
hsa04620	Toll-like receptor signaling pathway	1/107	104/8011	0.755265	0.92441	0.906133	CXCL11	1
hsa04625	C-type lectin receptor signaling pathway	1/107	104/8011	0.755265	0.92441	0.906133	CCL22	1
hsa04660	T cell receptor signaling pathway	1/107	104/8011	0.755265	0.92441	0.906133	PAK3	1
hsa04922	Glucagon signaling pathway	1/107	106/8011	0.761845	0.92441	0.906133	PGAM2	1
hsa04928	Parathyroid hormone synthesis, secretion and action	1/107	106/8011	0.761845	0.92441	0.906133	PRKCB	1
hsa05170	Human immunodeficiency virus 1 infection	2/107	212/8011	0.780366	0.92441	0.906133	PAK3/PRKCB	2
hsa05206	MicroRNAs in cancer	3/107	310/8011	0.789454	0.92441	0.906133	HMOX1/PRKCB/MDM4	3
hsa05168	Herpes simplex virus 1 infection	5/107	491/8011	0.793412	0.92441	0.906133	CD74/ZNF17/ZNF177/ZNF551/ZNF709	5
hsa04071	Sphingolipid signaling pathway	1/107	119/8011	0.800538	0.92441	0.906133	PRKCB	1
hsa04722	Neurotrophin signaling pathway	1/107	119/8011	0.800538	0.92441	0.906133	FRS2	1
hsa04919	Thyroid hormone signaling pathway	1/107	119/8011	0.800538	0.92441	0.906133	PRKCB	1
hsa04935	Growth hormone synthesis, secretion and action	1/107	119/8011	0.800538	0.92441	0.906133	PRKCB	1
hsa05135	Yersinia infection	1/107	120/8011	0.803243	0.92441	0.906133	FYB1	1
hsa04142	Lysosome	1/107	123/8011	0.81114	0.92441	0.906133	CLN3	1
hsa04714	Thermogenesis	2/107	231/8011	0.819479	0.92441	0.906133	PRDM16/FRS2	2
hsa04380	Osteoclast differentiation	1/107	128/8011	0.823609	0.92441	0.906133	NCF2	1
hsa05131	Shigellosis	2/107	236/8011	0.828691	0.92441	0.906133	HIST1H3F/HIST1H3C	2
hsa04270	Vascular smooth muscle contraction	1/107	132/8011	0.832995	0.92441	0.906133	PRKCB	1
hsa00190	Oxidative phosphorylation	1/107	133/8011	0.835263	0.92441	0.906133	ATP6V0E2	1
hsa04120	Ubiquitin mediated proteolysis	1/107	136/8011	0.841885	0.92441	0.906133	TRIM32	1
hsa04210	Apoptosis	1/107	136/8011	0.841885	0.92441	0.906133	TUBA3E	1
hsa04140	Autophagy - animal	1/107	137/8011	0.844034	0.92441	0.906133	DEPTOR	1
hsa04371	Apelin signaling pathway	1/107	137/8011	0.844034	0.92441	0.906133	SLC8A2	1
hsa04910	Insulin signaling pathway	1/107	137/8011	0.844034	0.92441	0.906133	SLC2A4	1
hsa04915	Estrogen signaling pathway	1/107	138/8011	0.846153	0.92441	0.906133	KRT13	1
hsa04514	Cell adhesion molecules (CAMs)	1/107	147/8011	0.863988	0.925272	0.906978	ITGB7	1
hsa04072	Phospholipase D signaling pathway	1/107	148/8011	0.865839	0.925272	0.906978	PDGFC	1
hsa04723	Retrograde endocannabinoid signaling	1/107	148/8011	0.865839	0.925272	0.906978	PRKCB	1
hsa04934	Cushing syndrome	1/107	155/8011	0.878113	0.925272	0.906978	WNT8B	1
hsa04218	Cellular senescence	1/107	160/8011	0.886193	0.925272	0.906978	HIPK1	1
hsa04217	Necroptosis	1/107	162/8011	0.889274	0.925272	0.906978	HIST1H2AB	1
hsa04630	JAK-STAT signaling pathway	1/107	162/8011	0.889274	0.925272	0.906978	IFNE	1
hsa05161	Hepatitis B	1/107	162/8011	0.889274	0.925272	0.906978	PRKCB	1
hsa04022	cGMP-PKG signaling pathway	1/107	167/8011	0.89662	0.925272	0.906978	SLC8A2	1
hsa04530	Tight junction	1/107	169/8011	0.899421	0.925272	0.906978	TUBA3E	1
hsa05164	Influenza A	1/107	170/8011	0.900794	0.925272	0.906978	PRKCB	1
hsa05152	Tuberculosis	1/107	180/8011	0.913537	0.933289	0.914836	CD74	1
hsa05169	Epstein-Barr virus infection	1/107	201/8011	0.935256	0.950341	0.931551	ISG15	1
hsa05132	Salmonella infection	1/107	214/8011	0.945893	0.95601	0.937108	PAK3	1
hsa05163	Human cytomegalovirus infection	1/107	225/8011	0.953528	0.9586	0.939646	PRKCB	1
hsa04740	Olfactory transduction	2/107	448/8011	0.984924	0.984924	0.96545	SLC8A2/OR8D1	2
